# Supplementary material for: Regulation of the ESC transcriptome by nuclear long noncoding RNAs
Source: HighWire-hosted journal article supplement (doi:10.1101/gr.189027.114), 2015-06-05
Supplement: Supp1_MappedReads.xlsx [file Supp1_MappedReads.xlsx]

## Sheet: Mapped_Reads_ESC_NPC
sample	uniquely mapped reads
AB22 ESC total	56385156
AB22 ESC nuclei	59568730
AB22 NPC total	63625092
AB22 NPC nuclei	61228068
Cast ESC clone 1	49968206
Cast ESC clone 2	67893488
Cast ESC clone 3	63414714
Cast ESC clone 4	59001050
Cast ESC clone 5	61064974
Cast ESC clone 6	53563814
Cast ESC clone 7	45525300
Cast NPC clone 1	48530168
Cast NPC clone 2	46652940
Cast NPC clone 3	53877118
Cast NPC clone 4	54410152
Cast NPC clone 5	54395690
Cast NPC clone 6	44323372
Cast NPC clone 7	46218286

## Sheet: Mapped_Reads_PAT14_kd
sample	uniquely mapped reads
Control ASO Rep1	65225438
Control ASO Rep2	73735284
Control ASO Rep3	59587952
Control ASO Rep4	64412396
PAT-14 ASO#2 Rep1	63508636
PAT-14 ASO#2 Rep2	58840136
PAT-14 ASO#2 Rep3	61854680
PAT-14 ASO#2 Rep4	55647958
PAT-14 ASO#3 Rep1	56442162
PAT-14 ASO#3 Rep2	51656470
PAT-14 ASO#3 Rep3	56260726
PAT-14 ASO#3 Rep4	56241132

## Sheet: Mapped_Reads_Firre_kd
sample	uniquely mapped reads
Control ASO Rep5	63313166
Control ASO Rep6	71476410
Control ASO Rep7	60933970
Control ASO Rep8	70561374
Firre ASO#2 Rep1	55217846
Firre ASO#2 Rep2	51439536
Firre ASO#2 Rep3	56029118
Firre ASO#2 Rep4	60772626
Firre ASO#5 Rep1	59145360
Firre ASO#5 Rep2	57390622
Firre ASO#5 Rep3	64269082
Firre ASO#5 Rep4	60182196
