# Supplementary material for: Regulation of the ESC transcriptome by nuclear long noncoding RNAs
Source: HighWire-hosted journal article supplement (doi:10.1101/gr.189027.114), 2015-06-05
Supplement: Supp2_LncrnaProfile.xlsx [file Supp2_LncrnaProfile.xlsx]

## Sheet: lncRNA_Profile
Gene short name	Gencode ID	Guttman lincRNA	Locus	Gene biotype	ESC FPKM (Cast)	NPC FPKM (Cast)	ESC FPKM (AB2.2)	NPC FPKM (AB2.2)	ESC log2 (nuc/tot)	NPC log2 (nuc/tot)	DESeq2 q-value	Significant	miRNA	snRNA	snoRNA	LTR	LINE	H3K4me3 (ESC)	H3K4me3 (NPC)	Oct4 (ESC)	Nanog (ESC)	Sox2 (NPC)	Brn2 (NPC)
H19	ENSMUSG00000000031.10	NA	chr7:142575528-142578143	lincRNA	71.209	0.198363	70.1438	183.995	-0.09	-0.51	7.33605e-18	TRUE	TRUE	FALSE	FALSE	FALSE	FALSE	FALSE	FALSE	FALSE	FALSE	FALSE	FALSE
Abhd1	ENSMUSG00000006638.9	NA	chr5:30950065-30955091	processed_transcript	0.469174	1.16075	0.64524	0.78367	-0.27	0.59	8.42448e-08	TRUE	FALSE	FALSE	FALSE	FALSE	FALSE	TRUE	TRUE	FALSE	FALSE	TRUE	FALSE
C4a	ENSMUSG00000015451.11	NA	chr17:34809091-34823464	processed_transcript	0.614661	0.556876	0.331714	0.305865	1.13	1.15	0.0164701	FALSE	FALSE	FALSE	FALSE	FALSE	FALSE	FALSE	FALSE	FALSE	FALSE	FALSE	FALSE
6330403K07Rik	ENSMUSG00000018451.6	NA	chr11:71031940-71033513	lincRNA	1.51127	8.01125	1.68143	16.8981	-0.27	-0.36	3.90492e-09	TRUE	FALSE	FALSE	FALSE	FALSE	FALSE	FALSE	TRUE	FALSE	FALSE	FALSE	FALSE
Meg3	ENSMUSG00000021268.12	NA	chr12:109541000-109571726	lincRNA	120.235	0.224071	127.946	26.506	0.56	0.47	NA	FALSE	TRUE	FALSE	FALSE	FALSE	FALSE	TRUE	FALSE	FALSE	FALSE	FALSE	FALSE
4933413J09Rik	ENSMUSG00000021874.7	NA	chr14:26356573-26400456	lincRNA	0.120636	0.0212841	0.145594	0.199859	0.89	0.95	0.0277054	FALSE	FALSE	FALSE	FALSE	FALSE	FALSE	FALSE	FALSE	FALSE	FALSE	FALSE	FALSE
5330426P16Rik	ENSMUSG00000022639.9	NA	chr16:50719293-50732773	lincRNA	0.449373	0.881271	0.891532	2.10961	-1.31	-0.9	0.0261457	FALSE	TRUE	FALSE	FALSE	FALSE	FALSE	TRUE	TRUE	FALSE	FALSE	TRUE	FALSE
Tmem134	ENSMUSG00000024845.12	NA	chr19:4125933-4132307	processed_transcript	21.8323	45.5276	10.742	14.4747	-0.5	-0.65	0.000735484	TRUE	FALSE	FALSE	FALSE	FALSE	FALSE	TRUE	TRUE	FALSE	FALSE	TRUE	FALSE
Gm9752	ENSMUSG00000025450.4	NA	chr13:119473803-119476761	processed_transcript	1.28023	0.374394	1.67796	1.21493	1.1	0.51	6.16265e-05	TRUE	FALSE	FALSE	FALSE	FALSE	FALSE	FALSE	FALSE	FALSE	FALSE	FALSE	FALSE
Gm7628	ENSMUSG00000025644.10	NA	chr9:109093843-109097796	processed_transcript	0.196009	0.1219	0.167881	0.155442	1.41	0.36	0.190305	FALSE	FALSE	FALSE	FALSE	FALSE	FALSE	FALSE	TRUE	FALSE	FALSE	FALSE	FALSE
Tctn2	ENSMUSG00000029386.10	NA	chr5:124598748-124627738	processed_transcript	4.23473	9.09331	6.38834	4.00535	-0.01	-0.08	7.73605e-08	TRUE	FALSE	FALSE	FALSE	FALSE	FALSE	FALSE	TRUE	FALSE	FALSE	TRUE	FALSE
Crnde	ENSMUSG00000031736.5	linc1399	chr8:92326037-92356120	lincRNA	3.28414	5.42466	1.3175	3.39074	0.29	-0.17	0.0949066	FALSE	FALSE	FALSE	FALSE	FALSE	FALSE	TRUE	TRUE	TRUE	FALSE	TRUE	FALSE
8430429K09Rik	ENSMUSG00000034587.8	NA	chr11:3452364-3479831	processed_transcript	0.988679	1.8347	2.05007	4.87394	0.75	-0.85	0.01491	FALSE	FALSE	FALSE	TRUE	FALSE	FALSE	TRUE	TRUE	TRUE	FALSE	FALSE	FALSE
1700006J14Rik	ENSMUSG00000034764.10	NA	chr10:120364156-120384336	processed_transcript	0.134184	0.213433	0.473888	1.15298	0.82	0.45	0.189991	FALSE	FALSE	FALSE	FALSE	FALSE	FALSE	FALSE	FALSE	FALSE	FALSE	FALSE	FALSE
1700021A07Rik	ENSMUSG00000037535.5	NA	chr10:21419357-21426565	lincRNA	0.0974294	0.0046855	0.574783	0	-1.88	NA	NA	FALSE	FALSE	FALSE	FALSE	TRUE	FALSE	FALSE	FALSE	FALSE	FALSE	FALSE	FALSE
2810032G03Rik	ENSMUSG00000037735.7	NA	chr12:5375869-5416631	lincRNA	0.0364614	0.116178	0.0365517	0.413612	-1.34	-0.63	NA	FALSE	FALSE	FALSE	FALSE	FALSE	FALSE	TRUE	TRUE	FALSE	FALSE	TRUE	FALSE
Gm9725	ENSMUSG00000037982.10	NA	chr8:81013575-81038584	lincRNA	4.59936	2.69451	3.35094	2.86452	-1.06	-0.47	0.637918	FALSE	FALSE	FALSE	FALSE	FALSE	FALSE	TRUE	TRUE	FALSE	FALSE	TRUE	FALSE
5033430I15Rik	ENSMUSG00000038152.4	NA	chr13:45965252-45966508	lincRNA	0.359521	0.269294	0.164635	0.248758	0.56	0.29	0.500908	FALSE	FALSE	FALSE	FALSE	FALSE	FALSE	TRUE	TRUE	FALSE	TRUE	FALSE	FALSE
Lhb	ENSMUSG00000038194.8	NA	chr7:45418352-45421854	processed_transcript	0.221425	0.00601097	0.165549	0.168533	1.33	0.05	4.99862e-09	TRUE	FALSE	FALSE	FALSE	FALSE	FALSE	FALSE	FALSE	FALSE	FALSE	FALSE	FALSE
3930402G23Rik	ENSMUSG00000038917.3	NA	chr8:10924426-10928457	lincRNA	0.11711	1.8677	0.0651096	0.329229	-0.55	0.53	5.80688e-19	TRUE	FALSE	FALSE	FALSE	FALSE	FALSE	FALSE	FALSE	FALSE	FALSE	FALSE	TRUE
4930591A17Rik	ENSMUSG00000039138.1	NA	chr2:179414935-179416882	lincRNA	0.164793	0	0.773512	0	-0.74	Inf	0.00121685	TRUE	FALSE	FALSE	FALSE	FALSE	FALSE	FALSE	FALSE	FALSE	FALSE	FALSE	FALSE
2210406O10Rik	ENSMUSG00000039563.6	NA	chr5:36447610-36464853	processed_transcript	0.122688	0.533812	0.125165	0.135894	0.01	1.03	0.000303433	TRUE	FALSE	FALSE	FALSE	FALSE	FALSE	TRUE	TRUE	FALSE	FALSE	TRUE	FALSE
BC006965	ENSMUSG00000041674.11	NA	chr11:112663926-112781976	processed_transcript	0.0230866	0.429279	0.000317606	0.666196	5.86	-0.35	1.09154e-09	TRUE	FALSE	FALSE	FALSE	FALSE	FALSE	TRUE	TRUE	FALSE	TRUE	FALSE	FALSE
4930433N12Rik	ENSMUSG00000042360.7	NA	chr9:3133846-3199799	lincRNA	0.568717	0.00173788	0.654307	0.000526366	-1.36	-Inf	4.73962e-09	TRUE	FALSE	FALSE	FALSE	FALSE	FALSE	FALSE	FALSE	FALSE	FALSE	FALSE	FALSE
Chd3os	ENSMUSG00000043419.10	NA	chr11:69340460-69342641	processed_transcript	2.08548	2.23736	1.0231	2.53686	-0.37	-0.62	0.739423	FALSE	FALSE	FALSE	FALSE	FALSE	FALSE	FALSE	TRUE	FALSE	FALSE	FALSE	FALSE
1520401A03Rik	ENSMUSG00000043747.7	NA	chr17:23704487-23722783	processed_transcript	0.543653	0.020467	0.189745	0.0481964	0.16	0.77	1.07275e-06	TRUE	FALSE	FALSE	FALSE	FALSE	FALSE	FALSE	FALSE	FALSE	FALSE	FALSE	FALSE
2900005J15Rik	ENSMUSG00000043833.6	NA	chr5:25100982-25110109	processed_transcript	0.0417032	0.241946	0.0934137	0.642748	-0.36	-0.43	0.000748814	TRUE	FALSE	FALSE	FALSE	FALSE	FALSE	TRUE	FALSE	FALSE	FALSE	FALSE	FALSE
2900052L18Rik	ENSMUSG00000043993.6	NA	chr11:120229801-120231585	processed_transcript	1.01477	4.31146	1.27869	2.27355	0.64	0.45	1.16898e-10	TRUE	FALSE	FALSE	FALSE	FALSE	FALSE	TRUE	TRUE	TRUE	TRUE	TRUE	TRUE
2410080I02Rik	ENSMUSG00000044387.5	NA	chr19:23134899-23135717	lincRNA	2.72134	0.0503351	0.8495	0	-0.69	Inf	3.76744e-14	TRUE	FALSE	FALSE	FALSE	FALSE	FALSE	TRUE	FALSE	TRUE	TRUE	FALSE	FALSE
Lincpint	ENSMUSG00000044471.6	NA	chr6:31093558-31218474	processed_transcript	0.370261	0.20308	0.404317	0.241295	1.11	-1.32	0.0328848	FALSE	FALSE	FALSE	FALSE	FALSE	FALSE	TRUE	TRUE	TRUE	FALSE	TRUE	FALSE
9930104L06Rik	ENSMUSG00000044730.10	NA	chr4:124937047-124944656	processed_transcript	6.15488	5.32696	8.54446	6.83184	-0.31	0.39	0.00320916	TRUE	FALSE	FALSE	FALSE	FALSE	FALSE	TRUE	TRUE	FALSE	FALSE	TRUE	FALSE
2810002D19Rik	ENSMUSG00000045464.5	NA	chr2:94406150-94411682	processed_transcript	1.49874	1.47411	1.12793	1.37878	-0.6	-0.02	0.865974	FALSE	FALSE	FALSE	FALSE	FALSE	FALSE	TRUE	TRUE	TRUE	FALSE	FALSE	FALSE
1700023L04Rik	ENSMUSG00000045709.10	NA	chr6:29985328-29993776	lincRNA	0.492871	0.0574507	0.129147	0	0.42	Inf	5.78048e-06	TRUE	TRUE	FALSE	FALSE	FALSE	FALSE	TRUE	FALSE	FALSE	FALSE	TRUE	FALSE
Irx3os	ENSMUSG00000046413.7	NA	chr8:91800414-91807539	lincRNA	0.105584	0.467944	0.116165	0.511517	0.61	-0.07	0.016885	FALSE	FALSE	FALSE	FALSE	FALSE	FALSE	TRUE	TRUE	FALSE	FALSE	FALSE	FALSE
B430212C06Rik	ENSMUSG00000046415.6	NA	chr18:67321208-67344103	processed_transcript	0.113731	0.373124	0.347594	0.590894	0.47	-0.18	0.000143424	TRUE	FALSE	FALSE	FALSE	TRUE	FALSE	FALSE	FALSE	TRUE	TRUE	TRUE	FALSE
5930403N24Rik	ENSMUSG00000046463.4	NA	chr10:37139401-37151315	processed_transcript	0.555667	2.51893	0.955322	3.16275	-1.13	-0.64	5.00182e-10	TRUE	FALSE	FALSE	FALSE	FALSE	FALSE	TRUE	TRUE	FALSE	FALSE	TRUE	FALSE
Atp10d	ENSMUSG00000046808.12	NA	chr5:72203328-72298775	processed_transcript	3.21702	1.40843	4.16464	2.08462	-0.17	-0.13	0.000110676	TRUE	FALSE	FALSE	FALSE	FALSE	FALSE	TRUE	TRUE	TRUE	TRUE	FALSE	FALSE
Mtag2	ENSMUSG00000049661.10	NA	chr7:45366162-45367948	processed_transcript	0.12941	0.338015	0.0315651	0.20835	2.4	-539.61	0.662494	FALSE	FALSE	FALSE	FALSE	FALSE	FALSE	TRUE	TRUE	FALSE	FALSE	TRUE	FALSE
C130071C03Rik	ENSMUSG00000050334.7	NA	chr13:83721380-83884194	lincRNA	0.729636	11.6334	0.565115	37.7984	-0.78	0.04	8.684e-27	TRUE	TRUE	FALSE	FALSE	FALSE	FALSE	FALSE	TRUE	TRUE	TRUE	TRUE	TRUE
4930412M03Rik	ENSMUSG00000051008.5	NA	chr11:60112218-60115230	lincRNA	0.328695	0.381813	1.63101	2.34221	0.29	0.01	0.949729	FALSE	FALSE	FALSE	FALSE	FALSE	FALSE	TRUE	TRUE	FALSE	FALSE	FALSE	FALSE
4930579K19Rik	ENSMUSG00000051074.3	NA	chr9:98562228-98563611	processed_transcript	0.21087	0.712466	0.11864	0.273102	1.47	0	0.00118894	TRUE	FALSE	FALSE	FALSE	FALSE	FALSE	TRUE	TRUE	FALSE	FALSE	TRUE	FALSE
C230029F24Rik	ENSMUSG00000051616.9	NA	chr1:49244615-49340443	lincRNA	0.121593	0.0558782	0.115029	0.124984	0.76	0.33	NA	FALSE	FALSE	FALSE	FALSE	FALSE	FALSE	FALSE	FALSE	FALSE	FALSE	FALSE	FALSE
E230016K23Rik	ENSMUSG00000051832.7	NA	chr11:83582055-83623693	processed_transcript	0.12494	0.00588376	0.124541	0.108595	-0.92	0.66	0.00083414	TRUE	FALSE	FALSE	FALSE	TRUE	TRUE	FALSE	FALSE	TRUE	FALSE	FALSE	FALSE
B230319C09Rik	ENSMUSG00000051844.8	NA	chr6:83441754-83448322	processed_transcript	0.138281	0.617072	0.204225	1.34253	0.97	0.35	2.48446e-05	TRUE	FALSE	FALSE	FALSE	FALSE	FALSE	FALSE	TRUE	FALSE	FALSE	TRUE	FALSE
F730043M19Rik	ENSMUSG00000052125.11	NA	chr12:33111710-33147597	processed_transcript	0.386759	0.270966	1.14267	1.93233	-0.77	-0.16	0.0898368	FALSE	FALSE	FALSE	FALSE	FALSE	FALSE	TRUE	TRUE	FALSE	FALSE	FALSE	FALSE
Gm9873	ENSMUSG00000052368.2	linc1515	chr2:169020024-169021385	lincRNA	1.02323	0.00563857	1.21245	0.555974	0.75	-0.05	2.3893e-13	TRUE	FALSE	FALSE	FALSE	FALSE	FALSE	FALSE	FALSE	FALSE	FALSE	FALSE	FALSE
Gm9885	ENSMUSG00000052629.5	NA	chr7:78578829-78581038	lincRNA	0.00561931	0.597078	0.0339769	0.299048	-Inf	-0.98	4.93817e-14	TRUE	FALSE	FALSE	FALSE	FALSE	FALSE	FALSE	TRUE	FALSE	FALSE	FALSE	FALSE
E330013P04Rik	ENSMUSG00000053117.5	NA	chr19:60144674-60162591	lincRNA	0.0461032	1.78427	0.0879821	0.469117	1.17	0.15	NA	FALSE	FALSE	FALSE	FALSE	FALSE	FALSE	FALSE	TRUE	FALSE	FALSE	FALSE	FALSE
Gm12592	ENSMUSG00000053263.3	NA	chr11:3305425-3331178	processed_transcript	1.94675	3.04689	3.2818	2.76419	-0.1	0.12	0.572631	FALSE	FALSE	FALSE	FALSE	FALSE	FALSE	TRUE	TRUE	TRUE	FALSE	TRUE	FALSE
AI854703	ENSMUSG00000053297.9	NA	chr6:48626763-48633689	lincRNA	0.142543	0.447853	0.893883	0.302965	0.2	0.21	6.93413e-05	TRUE	FALSE	FALSE	FALSE	FALSE	FALSE	TRUE	FALSE	FALSE	FALSE	FALSE	FALSE
Gas5	ENSMUSG00000053332.8	linc1425	chr1:161034421-161038539	processed_transcript	533.766	89.9678	79.2574	38.8851	0.6	0.7	4.12275e-21	TRUE	FALSE	FALSE	TRUE	FALSE	FALSE	TRUE	TRUE	FALSE	FALSE	FALSE	FALSE
4930563E22Rik	ENSMUSG00000053574.4	NA	chr11:72215137-72218450	processed_transcript	0.542637	1.37451	0.388003	0.927499	0.62	-0.07	0.0305133	FALSE	FALSE	FALSE	FALSE	FALSE	FALSE	TRUE	TRUE	TRUE	FALSE	TRUE	FALSE
Dancr	ENSMUSG00000053656.5	linc1538	chr5:74093059-74095405	processed_transcript	27.6127	3.01688	19.0122	7.80638	0.5	0.76	1.66156e-29	TRUE	FALSE	FALSE	TRUE	FALSE	FALSE	TRUE	TRUE	FALSE	FALSE	TRUE	FALSE
A430110L20Rik	ENSMUSG00000054135.2	NA	chr1:181225985-181228498	lincRNA	0.0653161	0.180412	0.0310472	0.511134	1.88	0.79	0.0195036	FALSE	FALSE	FALSE	FALSE	FALSE	FALSE	FALSE	FALSE	FALSE	FALSE	FALSE	FALSE
A930012O16Rik	ENSMUSG00000054181.6	NA	chr2:57236226-57238508	processed_transcript	0.365475	0.332315	0.13144	0.0456382	0.1	2.45	0.793407	FALSE	FALSE	FALSE	FALSE	FALSE	FALSE	TRUE	TRUE	TRUE	FALSE	FALSE	FALSE
4930517O19Rik	ENSMUSG00000054391.6	NA	chr14:100213141-100246280	processed_transcript	0.236185	0.16671	0.647223	0.8192	0.88	0.37	0.426798	FALSE	FALSE	FALSE	FALSE	TRUE	FALSE	FALSE	FALSE	FALSE	FALSE	FALSE	FALSE
2900041M22Rik	ENSMUSG00000054418.6	NA	chr11:117611246-117613857	processed_transcript	1.55002	0.00574521	2.00401	0.0132958	-0.63	-Inf	3.92321e-19	TRUE	FALSE	FALSE	FALSE	FALSE	FALSE	FALSE	FALSE	FALSE	FALSE	FALSE	FALSE
A930005H10Rik	ENSMUSG00000054426.6	NA	chr3:115881580-115888130	processed_transcript	0.77808	6.4352	2.32504	3.70559	-1.31	-0.49	5.91246e-15	TRUE	FALSE	FALSE	FALSE	FALSE	FALSE	TRUE	TRUE	FALSE	FALSE	FALSE	FALSE
D730045B01Rik	ENSMUSG00000054622.4	NA	chr5:151367719-151428210	lincRNA	0.10806	0.411646	0.148184	0.524855	-1.56	-0.2	2.48989e-10	TRUE	FALSE	FALSE	FALSE	FALSE	FALSE	TRUE	TRUE	TRUE	FALSE	TRUE	TRUE
5330416C01Rik	ENSMUSG00000054944.7	NA	chr13:97733497-97747411	lincRNA	0.0411637	0.344666	0.0115339	0.165049	-0.07	1.18	1.50879e-05	TRUE	FALSE	FALSE	FALSE	TRUE	FALSE	FALSE	FALSE	FALSE	FALSE	TRUE	FALSE
9130017K11Rik	ENSMUSG00000055134.5	NA	chr11:67921503-67947659	processed_transcript	0.283396	0.0108758	0.133938	0.0244992	-0.62	-0.02	7.27676e-06	TRUE	FALSE	FALSE	FALSE	FALSE	FALSE	TRUE	TRUE	TRUE	FALSE	FALSE	FALSE
Gm9968	ENSMUSG00000055370.3	NA	chr16:43345886-43363666	lincRNA	0.117131	0.107036	0.0927844	0.170672	0.76	0.64	0.696302	FALSE	FALSE	FALSE	FALSE	FALSE	FALSE	FALSE	FALSE	FALSE	FALSE	FALSE	FALSE
Gm14168	ENSMUSG00000055494.5	NA	chr2:156571791-156577457	lincRNA	0.1169	0.321969	0.0523025	0.277207	-0.24	1.06	0.00340916	TRUE	FALSE	FALSE	FALSE	FALSE	FALSE	FALSE	FALSE	FALSE	FALSE	FALSE	FALSE
AI504432	ENSMUSG00000056145.5	NA	chr3:107039503-107054347	lincRNA	0.140184	0.070409	0.22291	0.761779	0.14	-0.67	0.0843566	FALSE	FALSE	FALSE	FALSE	FALSE	FALSE	FALSE	FALSE	FALSE	FALSE	FALSE	FALSE
BC043934	ENSMUSG00000056418.3	NA	chr9:96435782-96438138	lincRNA	0.0112917	0.1995	0.022709	0.14735	-0.58	-0.06	0.000311284	TRUE	FALSE	FALSE	FALSE	FALSE	FALSE	FALSE	FALSE	FALSE	FALSE	TRUE	FALSE
Hoxaas2	ENSMUSG00000056445.8	NA	chr6:52165673-52169564	processed_transcript	0.014575	1.25627	0.0388038	1.4826	1.02	0.51	NA	FALSE	FALSE	FALSE	FALSE	FALSE	FALSE	FALSE	FALSE	FALSE	FALSE	TRUE	FALSE
Tug1	ENSMUSG00000056579.12	linc1256	chr11:3639784-3649042	processed_transcript	24.8693	7.8398	14.3979	15.3213	0.84	0.19	0.000540152	TRUE	FALSE	FALSE	FALSE	FALSE	FALSE	TRUE	TRUE	FALSE	FALSE	TRUE	FALSE
A930024E05Rik	ENSMUSG00000056735.5	NA	chr5:122989353-122998345	processed_transcript	1.61436	6.65743	0.861799	1.30729	-0.21	-0.19	5.23966e-06	TRUE	FALSE	FALSE	FALSE	FALSE	FALSE	TRUE	TRUE	FALSE	FALSE	TRUE	FALSE
A730036I17Rik	ENSMUSG00000056738.6	NA	chr2:129218968-129235604	lincRNA	0.830131	0.00644871	0.324695	0.0159172	-0.66	-Inf	1.72631e-15	TRUE	FALSE	FALSE	FALSE	FALSE	FALSE	FALSE	FALSE	TRUE	TRUE	FALSE	FALSE
1700028I16Rik	ENSMUSG00000056821.8	NA	chr10:82812122-82824242	lincRNA	1.45327	0.0164688	0.681576	0	-1.06	Inf	3.19563e-15	TRUE	FALSE	FALSE	FALSE	FALSE	FALSE	FALSE	FALSE	FALSE	FALSE	FALSE	FALSE
Gm15514	ENSMUSG00000057215.6	NA	chr7:107243021-107300396	lincRNA	0.491517	0.00209957	0.529122	0.000605062	0.6	-Inf	1.41514e-06	TRUE	FALSE	FALSE	FALSE	TRUE	FALSE	FALSE	FALSE	FALSE	FALSE	FALSE	FALSE
T2	ENSMUSG00000058159.8	NA	chr17:8372395-8422728	processed_transcript	0.189295	0.356288	0.148695	0.303166	-3.03	0.61	0.276372	FALSE	FALSE	FALSE	FALSE	FALSE	FALSE	FALSE	TRUE	FALSE	FALSE	TRUE	FALSE
9630013D21Rik	ENSMUSG00000059027.9	NA	chr4:109651528-109657853	processed_transcript	0.00474915	0.350436	0	0.662129	NA	0.2	1.04066e-07	TRUE	FALSE	FALSE	FALSE	FALSE	FALSE	TRUE	FALSE	FALSE	FALSE	FALSE	FALSE
R74862	ENSMUSG00000059277.7	NA	chr7:143021783-143053686	processed_transcript	0.906019	2.77968	1.11001	1.87152	-0.77	-0.43	1.79035e-30	TRUE	FALSE	FALSE	FALSE	FALSE	FALSE	TRUE	TRUE	FALSE	FALSE	TRUE	FALSE
Gm10069	ENSMUSG00000059659.5	linc1558	chr6:128438756-128475617	lincRNA	0.89304	0.0949062	0.931642	0.359698	0.01	0.54	1.45081e-28	TRUE	FALSE	FALSE	FALSE	FALSE	FALSE	TRUE	TRUE	FALSE	FALSE	TRUE	FALSE
A830035A12Rik	ENSMUSG00000059706.4	NA	chr11:107531756-107548373	processed_transcript	0.131461	0.0155811	0.1487	0.0041783	-0.11	-1.06	0.00355075	TRUE	FALSE	FALSE	FALSE	FALSE	FALSE	TRUE	TRUE	TRUE	FALSE	FALSE	FALSE
4930473A02Rik	ENSMUSG00000060029.8	NA	chr2:130543790-130563749	processed_transcript	0.246492	1.36876	0.368496	3.06962	0.52	0.07	0.305332	FALSE	FALSE	FALSE	FALSE	FALSE	FALSE	TRUE	TRUE	FALSE	FALSE	TRUE	FALSE
BC002059	ENSMUSG00000060149.6	NA	chr17:16951538-16974157	lincRNA	11.2715	1.03553	6.03084	2.96053	-0.04	0.21	4.07335e-08	TRUE	FALSE	FALSE	FALSE	FALSE	FALSE	FALSE	TRUE	FALSE	FALSE	FALSE	FALSE
C030014I23Rik	ENSMUSG00000060380.2	NA	chr9:44477923-44482180	lincRNA	0.17906	1.80811	0.207145	0.595143	0.02	-0.54	1.05368e-27	TRUE	FALSE	FALSE	FALSE	FALSE	FALSE	TRUE	TRUE	FALSE	FALSE	FALSE	FALSE
Pou3f3os	ENSMUSG00000060424.9	NA	chr1:42590781-42694842	lincRNA	0.0035611	54.3997	0.00432362	44.7209	0.52	-1.03	1.11765e-41	TRUE	FALSE	FALSE	FALSE	TRUE	FALSE	FALSE	TRUE	TRUE	FALSE	FALSE	TRUE
2010204K13Rik	ENSMUSG00000063018.6	linc1406	chrX:7411816-7445143	processed_transcript	44.8099	10.2857	28.8949	6.49765	-0.06	-0.45	1.09091e-05	TRUE	FALSE	FALSE	FALSE	FALSE	FALSE	FALSE	FALSE	TRUE	TRUE	FALSE	FALSE
Gm10125	ENSMUSG00000063087.9	NA	chr18:5491502-5593505	processed_transcript	0.0423733	0.918205	0.211668	0.252336	-1.72	0.56	3.5013e-17	TRUE	FALSE	FALSE	FALSE	FALSE	FALSE	TRUE	TRUE	TRUE	FALSE	FALSE	FALSE
Ptpmt1	ENSMUSG00000063235.11	NA	chr2:90908715-90918258	processed_transcript	14.998	29.2933	14.7944	15.3882	-0.23	-0.49	9.83963e-06	TRUE	FALSE	FALSE	FALSE	FALSE	FALSE	TRUE	TRUE	FALSE	FALSE	TRUE	FALSE
Gm13939	ENSMUSG00000063751.6	NA	chr2:109902395-109913319	processed_transcript	0.859295	0.0808706	0.90749	0.0554808	0.11	0.6	5.22574e-09	TRUE	FALSE	FALSE	FALSE	FALSE	TRUE	TRUE	FALSE	TRUE	TRUE	FALSE	FALSE
Trerf1	ENSMUSG00000064043.8	NA	chr17:47140874-47361958	processed_transcript	1.81436	2.91087	3.66067	3.58002	0.26	0.41	0.29315	FALSE	FALSE	FALSE	FALSE	FALSE	FALSE	TRUE	TRUE	TRUE	FALSE	FALSE	FALSE
Gm1631	ENSMUSG00000064263.6	NA	chr2:71719416-71730966	lincRNA	1.15429	0.0237712	2.09077	0.00601133	0.07	2.85	3.74029e-10	TRUE	FALSE	FALSE	FALSE	FALSE	FALSE	FALSE	FALSE	TRUE	TRUE	TRUE	FALSE
Gm1976	ENSMUSG00000066057.6	NA	chr17:94759943-94834799	lincRNA	2.07538	1.21402	4.37763	4.24726	0.2	0.01	0.0876964	FALSE	FALSE	FALSE	FALSE	FALSE	FALSE	TRUE	TRUE	FALSE	FALSE	TRUE	FALSE
E230001N04Rik	ENSMUSG00000066170.6	NA	chr17:28523256-28525347	lincRNA	0.288206	0.195888	0.520005	0.101351	-0.31	1.36	0.347791	FALSE	FALSE	FALSE	FALSE	FALSE	FALSE	TRUE	TRUE	FALSE	FALSE	TRUE	FALSE
Gm16551	ENSMUSG00000066477.8	NA	chr9:74847982-74860134	processed_transcript	0.110938	0.00490037	0.180599	0	1.13	NA	0.00106727	TRUE	FALSE	FALSE	FALSE	FALSE	FALSE	TRUE	FALSE	TRUE	TRUE	FALSE	FALSE
Gm14164	ENSMUSG00000068062.3	NA	chr2:152345668-152375324	processed_transcript	0.450108	0.259968	0.409216	0.0553467	-0.05	-1.33	6.28685e-06	TRUE	FALSE	FALSE	FALSE	FALSE	FALSE	TRUE	FALSE	TRUE	TRUE	FALSE	FALSE
4930581F22Rik	ENSMUSG00000070315.6	NA	chr9:35116727-35130922	processed_transcript	0.394411	0.471332	0.32475	0.950974	0.88	0.16	0.283814	FALSE	FALSE	FALSE	FALSE	FALSE	FALSE	TRUE	TRUE	TRUE	FALSE	TRUE	FALSE
Gm20634	ENSMUSG00000070392.4	NA	chr3:96245553-96248509	processed_transcript	0.0804217	0.854342	0.165446	0.221111	0.07	-1.58	NA	FALSE	FALSE	FALSE	FALSE	FALSE	FALSE	FALSE	TRUE	FALSE	FALSE	FALSE	FALSE
1700086L19Rik	ENSMUSG00000071265.4	NA	chr12:74284280-74295945	lincRNA	0.147821	0.216744	0.187873	0.358758	-2.06	-0.47	0.391709	FALSE	FALSE	FALSE	FALSE	FALSE	FALSE	FALSE	TRUE	TRUE	FALSE	FALSE	FALSE
A830039N20Rik	ENSMUSG00000071567.6	NA	chr14:23292290-23293643	lincRNA	0.00586207	0.95047	0	0.373474	Inf	0.9	NA	FALSE	FALSE	FALSE	FALSE	FALSE	FALSE	FALSE	FALSE	FALSE	FALSE	FALSE	FALSE
5930412G12Rik	ENSMUSG00000072591.5	NA	chr5:128579105-128600693	processed_transcript	0.565703	4.25738	0.172778	2.02954	0.42	0.02	0.000279894	TRUE	FALSE	FALSE	FALSE	FALSE	FALSE	TRUE	TRUE	TRUE	FALSE	TRUE	FALSE
Gm6712	ENSMUSG00000072761.5	NA	chr17:17294442-17319511	lincRNA	5.43363	0.367769	3.15636	1.16101	-0.07	-0.5	1.04244e-08	TRUE	FALSE	FALSE	FALSE	FALSE	FALSE	FALSE	TRUE	FALSE	FALSE	FALSE	FALSE
G530011O06Rik	ENSMUSG00000072844.6	NA	chrX:169975042-169978917	processed_transcript	2.37066	0.89144	0.0774056	0.421064	1.39	0.98	0.00213337	TRUE	FALSE	FALSE	FALSE	FALSE	FALSE	FALSE	FALSE	FALSE	FALSE	FALSE	FALSE
A530017D24Rik	ENSMUSG00000072847.4	NA	chr11:61864567-61868058	lincRNA	0.164556	0.130436	0.572256	0.297249	0.43	-1.55	0.953941	FALSE	FALSE	FALSE	FALSE	FALSE	FALSE	FALSE	FALSE	FALSE	FALSE	FALSE	FALSE
Gm10433	ENSMUSG00000072884.5	NA	chr12:100187967-100193540	processed_transcript	0.244514	0.170933	0.120192	0.0892973	0.99	-0.35	0.0720613	FALSE	FALSE	FALSE	FALSE	FALSE	FALSE	TRUE	TRUE	FALSE	FALSE	TRUE	FALSE
4933439C10Rik	ENSMUSG00000072893.7	NA	chr11:59505661-59513647	processed_transcript	4.38823	3.31375	2.93036	5.90459	0.72	0.61	0.0213609	FALSE	FALSE	FALSE	FALSE	FALSE	FALSE	TRUE	TRUE	TRUE	TRUE	TRUE	FALSE
9130019P16Rik	ENSMUSG00000073067.5	NA	chr6:54269680-54430221	lincRNA	0.0419701	1.07869	0.0338212	0.844491	-0.75	-0.97	2.74562e-06	TRUE	FALSE	FALSE	FALSE	FALSE	FALSE	TRUE	FALSE	FALSE	FALSE	FALSE	FALSE
Gm8098	ENSMUSG00000073073.4	NA	chr11:30267463-30280491	processed_transcript	0.0376631	0.111204	0.0287793	0.0971524	1.14	1.14	0.148353	FALSE	FALSE	FALSE	FALSE	FALSE	FALSE	TRUE	TRUE	FALSE	FALSE	TRUE	FALSE
5031425E22Rik	ENSMUSG00000073147.3	NA	chr5:23382307-23434269	lincRNA	7.26213	7.26033	6.12431	8.8221	0.34	-0.09	0.940839	FALSE	FALSE	FALSE	FALSE	FALSE	FALSE	TRUE	TRUE	TRUE	TRUE	TRUE	FALSE
1810058I24Rik	ENSMUSG00000073155.7	linc1545	chr6:35252653-35263496	lincRNA	33.6282	96.9615	33.2902	26.0432	-0.7	-0.93	2.01727e-10	TRUE	FALSE	FALSE	FALSE	FALSE	FALSE	TRUE	TRUE	TRUE	FALSE	TRUE	FALSE
2410018L13Rik	ENSMUSG00000073164.6	NA	chr12:22953996-23010284	lincRNA	4.48587	1.21927	0.422446	0.584608	0.05	-0.09	0.00017997	TRUE	FALSE	FALSE	FALSE	FALSE	FALSE	FALSE	FALSE	FALSE	FALSE	FALSE	FALSE
Gm10482	ENSMUSG00000073226.4	NA	chr5:10187865-10237890	lincRNA	0.886679	0.884036	2.62248	0.767797	-2.15	-2.28	0.980466	FALSE	FALSE	FALSE	FALSE	TRUE	FALSE	FALSE	FALSE	FALSE	FALSE	FALSE	FALSE
2500004C02Rik	ENSMUSG00000073236.4	NA	chr2:153341156-153346073	processed_transcript	2.07626	3.23607	0.747274	2.97564	1.04	-0.1	0.0206087	FALSE	FALSE	FALSE	FALSE	FALSE	FALSE	TRUE	TRUE	TRUE	TRUE	TRUE	FALSE
Gm14636	ENSMUSG00000073274.4	NA	chrX:19156980-19167241	processed_transcript	0.165472	0.0419735	0.166196	0.0925681	-0.05	0.39	0.00426669	TRUE	FALSE	FALSE	FALSE	FALSE	FALSE	FALSE	FALSE	FALSE	FALSE	FALSE	FALSE
C030034I22Rik	ENSMUSG00000073374.3	NA	chr17:69417401-69421632	lincRNA	0.515508	0.387589	0.236501	0.269781	0.57	-0.51	0.111892	FALSE	FALSE	FALSE	FALSE	FALSE	FALSE	TRUE	TRUE	FALSE	FALSE	TRUE	FALSE
D330041H03Rik	ENSMUSG00000073437.5	NA	chr17:24404648-24414542	processed_transcript	1.55437	6.0699	1.099	3.49633	0.22	-0.3	0.000406271	TRUE	FALSE	FALSE	FALSE	FALSE	FALSE	TRUE	TRUE	FALSE	FALSE	TRUE	FALSE
D730003I15Rik	ENSMUSG00000073478.5	linc1428	chr1:191224473-191225686	processed_transcript	1.34688	2.24103	1.07261	2.17325	-0.54	-0.17	0.0533116	FALSE	FALSE	FALSE	FALSE	FALSE	FALSE	TRUE	TRUE	FALSE	FALSE	TRUE	FALSE
F830208F22Rik	ENSMUSG00000073529.4	NA	chr18:77793258-77796743	processed_transcript	0.138838	0.00299529	0.366176	0	0.37	NA	8.58518e-14	TRUE	FALSE	FALSE	FALSE	FALSE	FALSE	FALSE	FALSE	FALSE	FALSE	FALSE	FALSE
E330020D12Rik	ENSMUSG00000073538.5	NA	chr1:153404826-153414233	processed_transcript	9.85827	0.0380773	3.11505	0.0547775	-0.06	0.95	1.88395e-44	TRUE	FALSE	FALSE	FALSE	TRUE	FALSE	FALSE	FALSE	FALSE	FALSE	FALSE	FALSE
C130036L24Rik	ENSMUSG00000073627.7	NA	chr1:86359573-86373791	processed_transcript	0.370025	0.461055	0.379662	0.489037	0.72	0.27	0.900075	FALSE	FALSE	FALSE	FALSE	FALSE	FALSE	TRUE	TRUE	FALSE	FALSE	TRUE	FALSE
Tmem51os1	ENSMUSG00000073728.5	NA	chr4:142083971-142088099	processed_transcript	0.448399	0.0805396	0.218777	0.17619	-0.08	-1.81	8.23951e-07	TRUE	FALSE	FALSE	FALSE	FALSE	FALSE	TRUE	TRUE	FALSE	FALSE	FALSE	FALSE
Gm10575	ENSMUSG00000073787.3	NA	chr7:141461480-141467771	processed_transcript	0.265904	0.208996	0.256273	0.281432	0.09	0.18	0.0333972	FALSE	FALSE	FALSE	FALSE	FALSE	FALSE	TRUE	TRUE	FALSE	FALSE	TRUE	FALSE
8030451A03Rik	ENSMUSG00000073821.6	NA	chr4:63979853-64149924	processed_transcript	0.336431	1.874	0.390907	7.04492	0.89	0.73	0.0268311	FALSE	FALSE	FALSE	FALSE	FALSE	FALSE	FALSE	FALSE	FALSE	FALSE	TRUE	TRUE
4930520O04Rik	ENSMUSG00000074039.5	NA	chr9:114368302-114377229	processed_transcript	0.181223	0.145892	0.2562	0.194807	0.76	0.36	0.000558354	TRUE	FALSE	FALSE	FALSE	FALSE	FALSE	FALSE	FALSE	FALSE	FALSE	FALSE	FALSE
Fam169b	ENSMUSG00000074071.4	NA	chr7:68273838-68363089	lincRNA	3.20026	0.00539368	0.317445	0.163016	-0.9	0.5	1.96518e-34	TRUE	FALSE	FALSE	FALSE	TRUE	TRUE	FALSE	FALSE	TRUE	TRUE	FALSE	FALSE
4930513N10Rik	ENSMUSG00000074136.3	NA	chr8:95806829-95821728	processed_transcript	0.787393	0.487959	1.2785	0.387304	-0.2	-0.14	0.0142172	FALSE	FALSE	FALSE	FALSE	FALSE	FALSE	TRUE	TRUE	FALSE	FALSE	TRUE	FALSE
D930028M14Rik	ENSMUSG00000074274.2	NA	chr7:25152456-25156627	lincRNA	0.440976	0.297668	0.576916	0.126659	-1.61	-0.52	0.182789	FALSE	FALSE	FALSE	FALSE	FALSE	FALSE	FALSE	FALSE	TRUE	FALSE	FALSE	FALSE
Gm12522	ENSMUSG00000074281.3	NA	chr3:108379276-108383741	processed_transcript	0.130548	0.122203	0.190666	0.348184	0.74	-1.06	0.915488	FALSE	FALSE	FALSE	FALSE	FALSE	FALSE	TRUE	TRUE	TRUE	FALSE	FALSE	FALSE
Gm10658	ENSMUSG00000074284.6	NA	chr9:57056629-57071966	processed_transcript	1.12431	2.3293	1.24107	3.09639	-0.38	-0.01	0.00775532	TRUE	FALSE	FALSE	FALSE	FALSE	FALSE	TRUE	TRUE	TRUE	FALSE	FALSE	FALSE
Gm15441	ENSMUSG00000074398.5	NA	chr3:96555764-96566801	processed_transcript	0.79172	0.0826935	1.03568	0.159699	-1.99	0.09	2.92599e-09	TRUE	FALSE	FALSE	FALSE	TRUE	FALSE	TRUE	FALSE	TRUE	TRUE	TRUE	FALSE
2610203C20Rik	ENSMUSG00000074415.5	NA	chr9:41376396-41617772	processed_transcript	1.01691	4.75789	1.88463	34.5793	1.24	0.69	0.00226818	TRUE	TRUE	FALSE	FALSE	FALSE	FALSE	FALSE	TRUE	FALSE	TRUE	TRUE	FALSE
Gm10710	ENSMUSG00000074517.2	NA	chr3:83125275-83129246	lincRNA	0.00464745	0.161896	0	0.681894	Inf	-0.41	3.46702e-08	TRUE	FALSE	FALSE	FALSE	FALSE	FALSE	FALSE	TRUE	FALSE	FALSE	FALSE	FALSE
BC029722	ENSMUSG00000074649.6	NA	chr2:155817729-155819426	processed_transcript	2.17744	6.45873	4.61992	4.75053	-0.69	-0.35	1.66232e-06	TRUE	FALSE	FALSE	FALSE	FALSE	FALSE	TRUE	TRUE	FALSE	FALSE	TRUE	FALSE
5830428H23Rik	ENSMUSG00000074733.9	NA	chr19:61053839-61140840	processed_transcript	3.37895	2.48844	3.37704	7.88481	0.22	0.23	0.428583	FALSE	FALSE	FALSE	FALSE	TRUE	FALSE	TRUE	TRUE	FALSE	FALSE	FALSE	FALSE
Gm14005	ENSMUSG00000074813.7	NA	chr2:128195992-128429349	processed_transcript	3.42552	3.8554	1.98124	1.85299	0.7	0.19	0.970085	FALSE	FALSE	FALSE	FALSE	FALSE	FALSE	FALSE	FALSE	TRUE	TRUE	FALSE	FALSE
Gm5665	ENSMUSG00000074863.4	NA	chr13:62699405-62726689	lincRNA	6.03628	0.145352	3.15633	1.03024	0.58	0.12	4.05109e-47	TRUE	FALSE	FALSE	FALSE	TRUE	FALSE	FALSE	FALSE	FALSE	FALSE	FALSE	FALSE
Spata5l1	ENSMUSG00000074876.5	NA	chr2:122630624-122632930	processed_transcript	3.98063	3.1232	2.05527	2.25285	-0.72	-0.49	0.19508	FALSE	FALSE	FALSE	FALSE	FALSE	FALSE	TRUE	TRUE	FALSE	FALSE	FALSE	FALSE
Gm14207	ENSMUSG00000074912.5	NA	chr2:119321186-119326194	processed_transcript	0.12514	0.0568149	0.143332	0.0767542	-0.07	-0.72	0.189414	FALSE	FALSE	FALSE	FALSE	FALSE	FALSE	TRUE	TRUE	TRUE	FALSE	FALSE	FALSE
E530001K10Rik	ENSMUSG00000075020.5	NA	chr2:94251878-94264758	lincRNA	0.0473048	0.930591	0.270479	1.89636	-2.08	-0.38	6.07018e-05	TRUE	TRUE	FALSE	FALSE	FALSE	FALSE	FALSE	TRUE	FALSE	TRUE	TRUE	TRUE
4631405J19Rik	ENSMUSG00000075027.4	NA	chr2:93027955-93044732	processed_transcript	0.0423067	0.242974	0.0829478	0.253183	1.12	0.65	0.010374	FALSE	FALSE	FALSE	FALSE	FALSE	FALSE	FALSE	TRUE	FALSE	FALSE	TRUE	FALSE
2810410L24Rik	ENSMUSG00000075389.3	linc1267	chr11:120185399-120189852	processed_transcript	0.131413	5.25756	0.328497	3.57618	-0.51	-0.13	5.78918e-32	TRUE	FALSE	FALSE	FALSE	FALSE	FALSE	TRUE	TRUE	FALSE	FALSE	TRUE	FALSE
Gm14488	ENSMUSG00000075416.5	NA	chr2:30713146-30720057	processed_transcript	0.0227684	0.103928	0.0257394	0.117272	1.01	-0.35	0.00466906	TRUE	FALSE	FALSE	FALSE	FALSE	FALSE	TRUE	TRUE	TRUE	FALSE	TRUE	TRUE
1700001L05Rik	ENSMUSG00000075511.3	linc1293	chr15:83357525-83367282	lincRNA	8.50368	0.10585	17.0051	0.853756	-0.95	-0.43	1.34366e-69	TRUE	FALSE	FALSE	FALSE	FALSE	FALSE	TRUE	TRUE	FALSE	FALSE	FALSE	FALSE
6330403L08Rik	ENSMUSG00000075585.3	NA	chr5:138995055-139000577	lincRNA	0.661877	0.873449	0.271617	0.289217	0.39	0.25	0.241772	FALSE	FALSE	FALSE	FALSE	FALSE	FALSE	TRUE	TRUE	TRUE	FALSE	FALSE	FALSE
Gm17106	ENSMUSG00000078489.2	NA	chr16:32985853-33108601	processed_transcript	0.27791	0.32717	0.516286	0.838996	0.5	0.53	NA	FALSE	TRUE	FALSE	FALSE	FALSE	FALSE	FALSE	FALSE	FALSE	FALSE	FALSE	FALSE
2310026L22Rik	ENSMUSG00000078519.3	NA	chr4:138215713-138216189	lincRNA	0.143822	0.325595	0.0937317	0.437589	0.68	-0.32	0.290896	FALSE	FALSE	FALSE	FALSE	FALSE	FALSE	TRUE	TRUE	FALSE	FALSE	TRUE	FALSE
D030028A08Rik	ENSMUSG00000078700.5	NA	chr11:96916269-96965060	processed_transcript	0.219849	0.0790991	0.942829	0.096409	-0.06	-0.91	2.08926e-07	TRUE	FALSE	FALSE	FALSE	FALSE	FALSE	TRUE	TRUE	FALSE	FALSE	TRUE	FALSE
Gm11008	ENSMUSG00000078891.4	NA	chr2:176097449-176100706	lincRNA	0.680011	0.0574029	0.218721	0.0532936	0.27	1.53	NA	FALSE	FALSE	FALSE	FALSE	FALSE	FALSE	FALSE	FALSE	FALSE	FALSE	FALSE	FALSE
Lincenc1	ENSMUSG00000078952.4	linc1468	chr13:97434969-97497007	lincRNA	62.6974	0.0104126	99.4387	0.256782	0	0.39	8.95042e-107	TRUE	FALSE	FALSE	FALSE	TRUE	FALSE	TRUE	FALSE	TRUE	TRUE	FALSE	FALSE
Gm14010	ENSMUSG00000079053.3	NA	chr2:128423653-128424565	lincRNA	0.168109	0.0596912	0.218357	0.0380652	0.53	1.94	NA	FALSE	FALSE	FALSE	FALSE	FALSE	FALSE	FALSE	FALSE	FALSE	FALSE	FALSE	FALSE
Gm13420	ENSMUSG00000079497.3	NA	chr2:29744918-29747250	processed_transcript	0.438232	0.0198453	0.413973	0	-1.51	Inf	3.9457e-05	TRUE	FALSE	FALSE	FALSE	FALSE	FALSE	FALSE	FALSE	FALSE	TRUE	FALSE	FALSE
6530402F18Rik	ENSMUSG00000079499.4	NA	chr2:29245106-29253006	processed_transcript	0.036934	3.29635	0.000497034	1.26867	6.79	-1.02	4.59091e-48	TRUE	FALSE	FALSE	FALSE	FALSE	FALSE	TRUE	TRUE	FALSE	FALSE	FALSE	FALSE
Gm17396	ENSMUSG00000079669.2	NA	chr9:117252535-117254696	processed_transcript	0.0079342	0.886609	0	0.539567	Inf	-0.23	8.60951e-14	TRUE	FALSE	FALSE	FALSE	FALSE	FALSE	FALSE	TRUE	FALSE	FALSE	FALSE	FALSE
2610203C22Rik	ENSMUSG00000079671.3	NA	chr1:9560831-9631175	processed_transcript	0.680474	1.81381	0.615615	0.846714	-0.62	-0.03	8.62245e-15	TRUE	FALSE	FALSE	FALSE	FALSE	FALSE	FALSE	TRUE	TRUE	FALSE	TRUE	FALSE
Gm16066	ENSMUSG00000082848.1	NA	chr19:3798614-3852419	processed_transcript	0.858802	0.536386	0.767218	1.21066	0.7	0.2	NA	FALSE	FALSE	FALSE	FALSE	FALSE	FALSE	TRUE	TRUE	FALSE	FALSE	TRUE	FALSE
Gm14074	ENSMUSG00000084762.1	linc1511	chr2:135648906-135652063	lincRNA	6.46367	0.0043022	5.26297	0.0219927	-0.63	-1.06	1.43696e-17	TRUE	FALSE	FALSE	FALSE	FALSE	FALSE	FALSE	FALSE	FALSE	FALSE	FALSE	FALSE
D930015M05Rik	ENSMUSG00000084781.1	NA	chr2:92408891-92432308	processed_transcript	0.266772	0.231203	0.467526	0.639174	0.48	0.37	0.0475232	FALSE	FALSE	FALSE	FALSE	FALSE	FALSE	FALSE	FALSE	FALSE	FALSE	FALSE	FALSE
Gm12974	ENSMUSG00000084789.1	NA	chr4:133816419-133817614	lincRNA	0.17962	0.0275381	0.32118	0	0.58	NA	NA	FALSE	FALSE	FALSE	FALSE	FALSE	FALSE	TRUE	FALSE	TRUE	TRUE	TRUE	FALSE
1700056N10Rik	ENSMUSG00000084792.1	NA	chr16:17047519-17049111	lincRNA	0.233319	0.203573	0.753637	0.392514	0.77	0.8	0.811358	FALSE	FALSE	FALSE	FALSE	FALSE	FALSE	FALSE	FALSE	FALSE	FALSE	FALSE	FALSE
A430104N18Rik	ENSMUSG00000084796.1	NA	chr11:87755576-87757270	lincRNA	11.2545	0	3.41082	0	0.87	NA	6.50619e-09	TRUE	TRUE	FALSE	FALSE	FALSE	FALSE	FALSE	FALSE	FALSE	FALSE	FALSE	FALSE
Gm14321	ENSMUSG00000084797.1	NA	chr2:167777466-167782569	lincRNA	0.505786	0.0676814	0.31198	0.372092	0.83	0.59	0.0450518	FALSE	FALSE	FALSE	FALSE	FALSE	FALSE	TRUE	FALSE	FALSE	FALSE	FALSE	FALSE
Ino80dos	ENSMUSG00000084799.2	NA	chr1:63113077-63158290	lincRNA	2.28092	0.882762	1.94824	2.18954	0.61	-0.05	0.00106209	TRUE	FALSE	FALSE	FALSE	FALSE	FALSE	TRUE	TRUE	FALSE	FALSE	FALSE	FALSE
9430091E24Rik	ENSMUSG00000084808.2	NA	chr8:111128885-111145480	processed_transcript	3.29585	2.51967	2.93485	3.4495	0.26	0.08	0.0234966	FALSE	FALSE	FALSE	FALSE	FALSE	FALSE	TRUE	TRUE	FALSE	FALSE	FALSE	FALSE
Gm17216	ENSMUSG00000084823.2	NA	chr6:148213366-148214573	lincRNA	0.227799	0.323857	0.403828	0.373904	0.22	0.32	0.555735	FALSE	FALSE	FALSE	FALSE	FALSE	FALSE	FALSE	FALSE	FALSE	FALSE	FALSE	FALSE
A730011C13Rik	ENSMUSG00000084846.1	NA	chr3:94994409-94997350	processed_transcript	0.670476	0.485668	0.868297	1.36139	0.88	0.61	0.265465	FALSE	FALSE	FALSE	FALSE	FALSE	FALSE	FALSE	FALSE	FALSE	FALSE	FALSE	FALSE
Gm16278	ENSMUSG00000084862.1	NA	chr17:25919088-25935745	processed_transcript	0.200119	0.370463	0.150923	0.143327	0.58	0.76	0.290722	FALSE	FALSE	FALSE	FALSE	FALSE	FALSE	TRUE	TRUE	FALSE	FALSE	TRUE	FALSE
A930006K02Rik	ENSMUSG00000084866.1	NA	chr16:91465103-91470121	processed_transcript	0.330194	0.483648	0.0821895	0.33969	0.36	0.12	0.067668	FALSE	FALSE	FALSE	FALSE	FALSE	FALSE	TRUE	FALSE	FALSE	FALSE	TRUE	FALSE
Gm14965	ENSMUSG00000084876.2	NA	chr19:6409399-6418606	processed_transcript	0.395086	1.22267	0.586406	0.0301644	0.22	0.85	7.45504e-07	TRUE	FALSE	FALSE	FALSE	FALSE	FALSE	FALSE	TRUE	FALSE	FALSE	FALSE	FALSE
Tomm6os	ENSMUSG00000084880.1	NA	chr17:47687609-47691083	processed_transcript	0.653778	1.34364	1.4637	0.70576	-2.04	0.1	0.00163482	TRUE	FALSE	FALSE	FALSE	FALSE	FALSE	TRUE	TRUE	TRUE	TRUE	TRUE	FALSE
3010001F23Rik	ENSMUSG00000084885.2	NA	chrX:152368572-152416698	processed_transcript	0.243677	0.6116	0.151495	0.830675	0.83	0.48	0.00160887	TRUE	FALSE	FALSE	FALSE	FALSE	FALSE	FALSE	TRUE	FALSE	FALSE	FALSE	FALSE
Gm14471	ENSMUSG00000084892.1	NA	chr2:30306066-30323986	processed_transcript	0.590307	0.26984	1.41528	1.12789	-0.09	-0.32	5.13027e-05	TRUE	FALSE	FALSE	FALSE	FALSE	FALSE	FALSE	FALSE	FALSE	FALSE	FALSE	FALSE
Gm11632	ENSMUSG00000084896.1	NA	chr11:98084456-98085424	processed_transcript	1.05697e-09	0.616281	1.52624e-10	1.84145	32.13	0.6	NA	FALSE	FALSE	FALSE	FALSE	FALSE	FALSE	FALSE	FALSE	TRUE	TRUE	FALSE	FALSE
Gm15344	ENSMUSG00000084899.1	NA	chr10:86692118-86693095	processed_transcript	1.2425	0.10153	1.16857	1.54877	1.74	-0.63	1.46025e-13	TRUE	FALSE	FALSE	FALSE	FALSE	FALSE	FALSE	FALSE	FALSE	FALSE	FALSE	FALSE
Gm14827	ENSMUSG00000084904.1	NA	chrX:94442731-94447727	lincRNA	0.0343684	0.111269	0.100072	0.410147	0.6	0.42	0.00701369	TRUE	FALSE	FALSE	FALSE	FALSE	TRUE	FALSE	FALSE	FALSE	FALSE	FALSE	FALSE
C630043F03Rik	ENSMUSG00000084910.1	NA	chr4:72201347-72215352	processed_transcript	0.441108	1.44517	0.233473	0.829579	0.53	0.89	6.0307e-06	TRUE	FALSE	FALSE	FALSE	FALSE	FALSE	TRUE	TRUE	FALSE	FALSE	FALSE	FALSE
Gm17477	ENSMUSG00000084917.3	NA	chr9:80118894-80121937	lincRNA	0.314898	0.0826524	0.751309	0.676379	0.53	-0.01	0.00126564	TRUE	FALSE	FALSE	FALSE	FALSE	FALSE	FALSE	FALSE	FALSE	FALSE	FALSE	FALSE
Gm11944	ENSMUSG00000084941.1	NA	chr11:3308995-3320722	processed_transcript	1.07234	1.58047	1.31084	2.95802	0.24	0.11	0.322067	FALSE	FALSE	FALSE	FALSE	FALSE	FALSE	FALSE	FALSE	FALSE	FALSE	FALSE	FALSE
B430010I23Rik	ENSMUSG00000084960.1	NA	chr8:41017467-41024216	processed_transcript	0.289249	0.147747	0.748143	0.210895	0.1	0.32	0.0599493	FALSE	FALSE	FALSE	FALSE	FALSE	FALSE	FALSE	FALSE	FALSE	FALSE	FALSE	FALSE
Gm12743	ENSMUSG00000084968.1	NA	chr4:108592424-108619849	processed_transcript	1.81205	0.182748	1.93181	0.492409	0.51	0.45	1.33899e-17	TRUE	FALSE	FALSE	FALSE	FALSE	FALSE	TRUE	TRUE	FALSE	FALSE	TRUE	FALSE
Gm15567	ENSMUSG00000084974.1	NA	chr7:27249262-27257932	processed_transcript	0.425661	0.796949	0.667976	0.65045	0.43	0.04	0.816471	FALSE	FALSE	FALSE	FALSE	FALSE	FALSE	TRUE	TRUE	TRUE	FALSE	FALSE	FALSE
Gm15471	ENSMUSG00000084997.2	NA	chr3:103803128-103808439	processed_transcript	1.30982	0.99984	0.917743	0.885682	-0.2	-0.68	NA	FALSE	FALSE	FALSE	FALSE	FALSE	FALSE	FALSE	FALSE	FALSE	FALSE	FALSE	FALSE
Gm11549	ENSMUSG00000085007.1	NA	chr3:36515056-36521813	processed_transcript	0.0959768	0.312966	0	0.7317	NA	-0.74	NA	FALSE	FALSE	FALSE	FALSE	FALSE	FALSE	FALSE	FALSE	TRUE	FALSE	FALSE	FALSE
Gm11335	ENSMUSG00000085016.1	NA	chr13:23527010-23530943	processed_transcript	0.0156295	0.21443	0.034716	0.292155	1	-0.9	0.000200027	TRUE	FALSE	FALSE	FALSE	FALSE	FALSE	TRUE	TRUE	TRUE	FALSE	TRUE	FALSE
C230035I16Rik	ENSMUSG00000085024.1	NA	chr13:23427974-23431022	lincRNA	0.677816	1.74073	0.590474	1.81765	0.51	0.38	4.00007e-07	TRUE	FALSE	FALSE	FALSE	FALSE	FALSE	TRUE	TRUE	TRUE	FALSE	TRUE	TRUE
4933421O10Rik	ENSMUSG00000085037.1	NA	chr4:33027141-33031323	processed_transcript	0.139416	0.437424	0.165684	1.03152	0.19	0.13	1.20437e-05	TRUE	FALSE	FALSE	FALSE	FALSE	FALSE	TRUE	TRUE	FALSE	FALSE	TRUE	FALSE
Gm15927	ENSMUSG00000085039.1	NA	chr7:3632113-3644887	processed_transcript	2.41966	1.14455	2.76073	1.24609	0.07	0.22	1.35286e-09	TRUE	FALSE	FALSE	FALSE	FALSE	FALSE	TRUE	TRUE	TRUE	FALSE	TRUE	FALSE
Gm15834	ENSMUSG00000085054.2	NA	chr1:58505147-58523230	lincRNA	0.114908	0.155434	0.167946	0.461619	1.22	-0.02	0.865025	FALSE	FALSE	FALSE	FALSE	FALSE	FALSE	TRUE	TRUE	FALSE	FALSE	TRUE	FALSE
4930570G19Rik	ENSMUSG00000085084.2	NA	chr3:156546752-156561746	processed_transcript	0.0529958	0.781649	0.0250377	1.06506	0.48	-0.06	1.77494e-11	TRUE	FALSE	FALSE	FALSE	FALSE	FALSE	TRUE	TRUE	TRUE	FALSE	FALSE	FALSE
1700086P04Rik	ENSMUSG00000085085.2	NA	chr4:129050096-129057983	lincRNA	0.70041	0.336734	0.561295	0.167261	0.51	1.03	0.0221241	FALSE	FALSE	FALSE	FALSE	FALSE	FALSE	TRUE	TRUE	FALSE	FALSE	FALSE	FALSE
4931413K12Rik	ENSMUSG00000085088.1	NA	chr11:75589664-75594771	processed_transcript	0.530637	0.249812	1.4869	0.692797	0.7	0.77	0.0117898	FALSE	FALSE	FALSE	FALSE	FALSE	FALSE	FALSE	FALSE	FALSE	FALSE	FALSE	FALSE
Gm13227	ENSMUSG00000085101.2	NA	chr4:145410244-145449756	processed_transcript	2.37371	0.0113426	0.71066	0.00570724	0.75	0.36	1.81262e-09	TRUE	FALSE	FALSE	FALSE	FALSE	FALSE	FALSE	FALSE	FALSE	FALSE	FALSE	FALSE
Gm12758	ENSMUSG00000085105.1	NA	chr7:34234376-34240207	processed_transcript	0.529753	0.122199	0.05144	0.112133	1.52	-0.59	4.10429e-11	TRUE	FALSE	FALSE	FALSE	FALSE	FALSE	TRUE	TRUE	TRUE	FALSE	TRUE	TRUE
Gm12609	ENSMUSG00000085147.1	NA	chr4:89381956-89399880	processed_transcript	0.0628661	0.382749	0.0188262	0.501006	1.87	0.51	0.00182779	TRUE	FALSE	FALSE	FALSE	FALSE	FALSE	FALSE	FALSE	FALSE	FALSE	FALSE	FALSE
Mir22hg	ENSMUSG00000085148.1	NA	chr11:75461538-75466676	processed_transcript	5.41169	1.61404	8.25386	3.69773	0.57	0.23	0.000741221	TRUE	TRUE	FALSE	FALSE	FALSE	FALSE	TRUE	TRUE	FALSE	TRUE	TRUE	FALSE
Gm11496	ENSMUSG00000085152.1	NA	chr11:88993039-88996544	lincRNA	1.57124	0.00385427	1.00194	0	-0.42	NA	9.77692e-10	TRUE	FALSE	FALSE	FALSE	FALSE	FALSE	FALSE	FALSE	TRUE	TRUE	FALSE	FALSE
Gm11974	ENSMUSG00000085156.2	linc1257	chr11:6525590-6528760	processed_transcript	37.011	15.5936	43.9262	19.3068	0.13	0.04	1.43824e-08	TRUE	FALSE	FALSE	TRUE	FALSE	FALSE	TRUE	TRUE	FALSE	FALSE	TRUE	FALSE
Gm10785	ENSMUSG00000085169.1	NA	chr16:91688910-91715642	processed_transcript	0.125501	0.148204	0.166091	0.527794	0.94	-0.73	0.569072	FALSE	FALSE	FALSE	FALSE	FALSE	FALSE	TRUE	TRUE	FALSE	FALSE	FALSE	FALSE
Gm16206	ENSMUSG00000085174.1	NA	chr3:53452618-53457797	processed_transcript	0.26593	0.177628	0.615357	0.522886	0.74	0.9	0.20772	FALSE	FALSE	FALSE	FALSE	FALSE	FALSE	FALSE	FALSE	FALSE	FALSE	FALSE	FALSE
AI838599	ENSMUSG00000085180.1	NA	chr4:3242054-3258092	lincRNA	0.367917	0.0426307	0.133864	0.395428	-0.88	-0.06	0.00032906	TRUE	FALSE	FALSE	FALSE	FALSE	TRUE	FALSE	FALSE	FALSE	FALSE	FALSE	FALSE
4933439K11Rik	ENSMUSG00000085184.4	NA	chr1:172538132-172558129	processed_transcript	0.198393	0.0370882	0.170411	0.0104162	-1.03	2.1	6.79517e-05	TRUE	FALSE	FALSE	FALSE	FALSE	FALSE	FALSE	FALSE	FALSE	FALSE	FALSE	FALSE
BC028777	ENSMUSG00000085185.4	NA	chr17:24208860-24221730	processed_transcript	0.625986	0.121688	0.695623	0.314121	0.68	0.19	5.36837e-08	TRUE	FALSE	FALSE	FALSE	FALSE	FALSE	TRUE	TRUE	TRUE	FALSE	FALSE	FALSE
Gm16012	ENSMUSG00000085194.1	NA	chr7:81059112-81066307	processed_transcript	0.179473	0.00358308	0.208782	0.0814423	1.13	-8.89	NA	FALSE	FALSE	FALSE	FALSE	FALSE	FALSE	FALSE	FALSE	FALSE	FALSE	FALSE	FALSE
Gm15327	ENSMUSG00000085204.1	NA	chr13:111809140-111811039	processed_transcript	0.124279	0.11751	0.105112	0.164542	-0.89	-0.23	0.437338	FALSE	FALSE	FALSE	FALSE	FALSE	FALSE	FALSE	TRUE	FALSE	FALSE	TRUE	FALSE
0610005C13Rik	ENSMUSG00000085214.2	NA	chr7:45567794-45575327	processed_transcript	0.414893	0.0142515	0.133965	0.00460845	-0.68	-Inf	3.72564e-08	TRUE	FALSE	FALSE	FALSE	TRUE	FALSE	TRUE	TRUE	FALSE	TRUE	TRUE	FALSE
BB218582	ENSMUSG00000085218.2	NA	chr2:106642913-106650364	processed_transcript	0.596632	0.203911	0.831716	0.397345	-0.39	0.14	0.74134	FALSE	FALSE	FALSE	FALSE	FALSE	FALSE	FALSE	FALSE	FALSE	FALSE	FALSE	TRUE
Snhg3	ENSMUSG00000085241.2	linc1343	chr4:132348013-132353686	processed_transcript	6.75996	1.89725	15.2862	2.26262	-1.36	-0.83	3.80066e-11	TRUE	FALSE	FALSE	TRUE	FALSE	FALSE	TRUE	TRUE	FALSE	FALSE	FALSE	FALSE
Gm12847	ENSMUSG00000085249.1	NA	chr4:115818856-115822655	lincRNA	0.260071	0.0726176	0.436207	0.0913804	-0.13	1.48	0.00896348	TRUE	FALSE	FALSE	FALSE	FALSE	FALSE	FALSE	FALSE	TRUE	FALSE	FALSE	FALSE
Gm15234	ENSMUSG00000085250.1	NA	chr3:94658960-94660115	processed_transcript	0.304867	0.00610751	0.106311	0.0328099	1.52	-0.06	5.24082e-06	TRUE	FALSE	FALSE	FALSE	FALSE	FALSE	FALSE	FALSE	FALSE	FALSE	FALSE	FALSE
Gm11574	ENSMUSG00000085262.1	NA	chr11:97048690-97051432	processed_transcript	2.76127	3.77536	4.02585	2.06824	-0.93	-1.14	NA	FALSE	FALSE	FALSE	FALSE	FALSE	FALSE	TRUE	TRUE	FALSE	FALSE	FALSE	TRUE
Gm14235	ENSMUSG00000085267.1	NA	chr2:168148016-168153533	lincRNA	0.199315	0.0148994	0.251986	0.0987146	-0.07	-2.03	0.0103569	FALSE	FALSE	FALSE	FALSE	FALSE	FALSE	FALSE	FALSE	FALSE	FALSE	TRUE	FALSE
BC046401	ENSMUSG00000085274.1	NA	chr2:165857683-165859034	processed_transcript	1.02147	0.342143	1.9768	0.894528	0.73	0.45	4.45228e-06	TRUE	FALSE	FALSE	FALSE	FALSE	FALSE	TRUE	FALSE	TRUE	FALSE	TRUE	FALSE
Gm15663	ENSMUSG00000085282.3	NA	chr10:105573952-105583874	processed_transcript	0.0138223	2.748	0.0117167	1.08278	-0.07	0	4.0968e-45	TRUE	FALSE	FALSE	FALSE	FALSE	FALSE	TRUE	TRUE	FALSE	FALSE	TRUE	TRUE
4833418N02Rik	ENSMUSG00000085287.3	NA	chr17:87274885-87282814	lincRNA	0.22235	0.546276	0.108062	0.779162	0.98	0.54	0.000100637	TRUE	FALSE	FALSE	FALSE	FALSE	FALSE	TRUE	TRUE	TRUE	FALSE	TRUE	FALSE
F730035M05Rik	ENSMUSG00000085298.2	NA	chr12:70227840-70234165	lincRNA	0	0.119054	0	0.131726	NA	0.57	0.0222551	FALSE	FALSE	FALSE	FALSE	FALSE	FALSE	FALSE	FALSE	FALSE	FALSE	FALSE	FALSE
Gm14866	ENSMUSG00000085314.1	NA	chrX:100736982-100740929	processed_transcript	0.0211278	4.68541	0.0354045	4.50648	0.54	0.19	0.129193	FALSE	FALSE	FALSE	FALSE	FALSE	FALSE	FALSE	FALSE	FALSE	FALSE	FALSE	FALSE
D330050G23Rik	ENSMUSG00000085316.1	NA	chr2:116900151-116912791	lincRNA	0.0587199	0.30322	0.0472774	0.100966	1	-1.15	0.00197222	TRUE	FALSE	FALSE	FALSE	FALSE	FALSE	FALSE	FALSE	FALSE	FALSE	FALSE	FALSE
Gm14261	ENSMUSG00000085322.1	NA	chr2:168766142-168768108	processed_transcript	1.25225	0	2.00156	0	-1.32	NA	3.47746e-06	TRUE	FALSE	FALSE	FALSE	FALSE	FALSE	TRUE	FALSE	TRUE	TRUE	FALSE	FALSE
Gm12940	ENSMUSG00000085334.2	NA	chr4:127033730-127049398	processed_transcript	5.93957	1.16022	6.05491	5.0234	1.07	0.28	8.32942e-06	TRUE	FALSE	FALSE	FALSE	FALSE	FALSE	FALSE	FALSE	FALSE	FALSE	FALSE	FALSE
Gm13684	ENSMUSG00000085335.1	NA	chr2:83737781-83759865	processed_transcript	0.210861	0.274847	0.275305	0.653947	0.42	0.94	0.511607	FALSE	FALSE	FALSE	FALSE	FALSE	FALSE	FALSE	FALSE	FALSE	FALSE	FALSE	FALSE
2410004I01Rik	ENSMUSG00000085338.1	NA	chr11:102958299-102964387	lincRNA	0.0976295	0.00221899	0.539864	0.0292464	-2.53	0.94	0.000591198	TRUE	FALSE	FALSE	FALSE	FALSE	FALSE	FALSE	FALSE	FALSE	FALSE	FALSE	FALSE
Gm2044	ENSMUSG00000085354.1	NA	chr7:139957004-139958039	lincRNA	0.177572	0.0133781	0.507156	0.100624	0.45	-0.64	0.00192984	TRUE	TRUE	FALSE	FALSE	FALSE	FALSE	FALSE	FALSE	FALSE	FALSE	FALSE	FALSE
3010003L21Rik	ENSMUSG00000085355.2	NA	chr6:148944866-148947129	lincRNA	1.99802	0.509166	3.30891	0.623595	0.64	-0.61	2.50963e-05	TRUE	FALSE	FALSE	FALSE	FALSE	FALSE	TRUE	TRUE	TRUE	TRUE	TRUE	FALSE
2310058D17Rik	ENSMUSG00000085379.1	NA	chr11:58965747-58978050	processed_transcript	0.249896	1.19338	0.176755	0.220093	1.43	0.75	1.3452e-15	TRUE	FALSE	FALSE	FALSE	FALSE	FALSE	TRUE	TRUE	FALSE	FALSE	TRUE	FALSE
9430008C03Rik	ENSMUSG00000085385.2	linc1329	chr2:158353699-158361580	processed_transcript	43.9544	10.5983	39.0835	16.1656	0.42	0.47	2.21587e-28	TRUE	FALSE	FALSE	TRUE	FALSE	FALSE	TRUE	FALSE	FALSE	FALSE	TRUE	FALSE
1700003M07Rik	ENSMUSG00000085389.2	NA	chr4:129960373-129963657	lincRNA	0.43274	1.55488	0.331854	1.1844	-0.22	-0.47	3.46529e-05	TRUE	FALSE	FALSE	FALSE	FALSE	FALSE	TRUE	TRUE	TRUE	FALSE	TRUE	TRUE
Gm13056	ENSMUSG00000085395.1	NA	chr4:141278438-141279794	lincRNA	3.0578	0.117888	0.654873	0.0615521	-0.27	1.94	1.56561e-09	TRUE	FALSE	FALSE	FALSE	FALSE	FALSE	FALSE	FALSE	FALSE	FALSE	FALSE	FALSE
Firre	ENSMUSG00000085396.2	linc1409	chrX:50555743-50635321	processed_transcript	28.5238	5.23678	23.525	9.15662	0.5	0.77	2.88668e-16	TRUE	FALSE	FALSE	FALSE	FALSE	FALSE	TRUE	TRUE	FALSE	FALSE	FALSE	FALSE
Foxd2os	ENSMUSG00000085399.2	NA	chr4:114909256-114921967	processed_transcript	0.0721338	1.38568	0.0762384	1.29222	-0.61	0.35	2.94712e-18	TRUE	FALSE	FALSE	FALSE	FALSE	FALSE	FALSE	TRUE	FALSE	FALSE	TRUE	FALSE
C530005A16Rik	ENSMUSG00000085408.1	NA	chr4:116589732-116597630	processed_transcript	5.10781	1.50647	4.25349	2.3296	0.35	-0.09	0.000150849	TRUE	FALSE	FALSE	FALSE	FALSE	FALSE	TRUE	FALSE	TRUE	FALSE	FALSE	FALSE
Linchoxa1	ENSMUSG00000085412.2	linc1547	chr6:52102948-52113684	lincRNA	6.30951	3.79099	8.70788	3.4854	0.21	-0.7	0.185714	FALSE	FALSE	FALSE	FALSE	FALSE	FALSE	TRUE	FALSE	FALSE	FALSE	FALSE	FALSE
Gm12060	ENSMUSG00000085415.1	NA	chr11:23558057-23558842	processed_transcript	0.619011	1.25718	0.334336	1.01714	0.45	0.42	0.0619367	FALSE	FALSE	FALSE	FALSE	FALSE	TRUE	FALSE	FALSE	FALSE	FALSE	FALSE	FALSE
Gm11734	ENSMUSG00000085419.1	NA	chr11:117523602-117532205	lincRNA	0.0596944	0.971108	0.339531	0.905157	-0.93	0.49	3.90114e-07	TRUE	FALSE	FALSE	FALSE	FALSE	FALSE	FALSE	FALSE	FALSE	FALSE	TRUE	FALSE
1700020I14Rik	ENSMUSG00000085438.1	linc1510	chr2:119594296-119607502	lincRNA	17.1784	8.22692	13.2163	17.0224	-0.53	-0.53	0.038111	FALSE	FALSE	FALSE	FALSE	FALSE	FALSE	TRUE	TRUE	FALSE	FALSE	FALSE	FALSE
Trmt61b	ENSMUSG00000085492.2	NA	chr17:71557026-71598755	processed_transcript	4.49267	3.82381	3.96808	4.24031	-0.17	-1.11	0.67938	FALSE	FALSE	FALSE	FALSE	FALSE	FALSE	TRUE	TRUE	TRUE	FALSE	TRUE	FALSE
Gm14224	ENSMUSG00000085524.1	NA	chr2:156451905-156455651	lincRNA	0.106645	0.0510344	0.460712	0.16919	-0.05	-1.66	0.58347	FALSE	FALSE	FALSE	FALSE	FALSE	FALSE	FALSE	FALSE	TRUE	FALSE	FALSE	FALSE
Gm13166	ENSMUSG00000085525.2	NA	chr4:146251828-146278434	lincRNA	20.8874	1.72157	14.3599	0.898841	-0.38	-0.25	7.87248e-05	TRUE	FALSE	FALSE	FALSE	TRUE	FALSE	FALSE	FALSE	FALSE	FALSE	FALSE	FALSE
Gm15535	ENSMUSG00000085527.1	NA	chr3:85556045-85573945	processed_transcript	0.147066	0.0829308	0.218522	0.0677645	-2.2	0.65	0.0405618	FALSE	FALSE	FALSE	FALSE	FALSE	FALSE	TRUE	TRUE	TRUE	FALSE	TRUE	FALSE
1810063I02Rik	ENSMUSG00000085551.1	NA	chr11:59921498-59921889	lincRNA	0.33176	0	1.0947	0	-0.56	NA	0.00742691	TRUE	FALSE	FALSE	FALSE	TRUE	FALSE	FALSE	FALSE	FALSE	TRUE	FALSE	FALSE
2610035F20Rik	ENSMUSG00000085555.4	NA	chr14:122470283-122475199	processed_transcript	0.641225	0.299489	0.485444	0.611988	-0.61	-0.32	0.000159509	TRUE	FALSE	FALSE	FALSE	FALSE	FALSE	TRUE	TRUE	TRUE	FALSE	TRUE	FALSE
4930412C18Rik	ENSMUSG00000085558.2	NA	chr4:9770584-9823411	processed_transcript	0.106786	0.0703585	0.134546	0.0417216	0.02	-1.63	0.932528	FALSE	FALSE	FALSE	FALSE	FALSE	FALSE	FALSE	FALSE	TRUE	FALSE	FALSE	FALSE
2610028E06Rik	ENSMUSG00000085562.2	NA	chr4:125887850-125922417	lincRNA	0.315022	0.00581232	0.120768	0	-2.42	Inf	1.40033e-05	TRUE	FALSE	FALSE	FALSE	FALSE	FALSE	FALSE	FALSE	FALSE	FALSE	FALSE	FALSE
A730017L22Rik	ENSMUSG00000085566.1	NA	chr2:130873058-130906396	processed_transcript	0.091275	0.634883	0.222856	1.49976	-0.57	-0.32	6.59087e-18	TRUE	FALSE	FALSE	FALSE	FALSE	FALSE	TRUE	TRUE	TRUE	FALSE	FALSE	FALSE
Gm12602	ENSMUSG00000085569.1	NA	chr4:89100663-89128226	processed_transcript	0.133945	0.00249246	0.148525	0	-2.44	Inf	0.00232959	TRUE	FALSE	FALSE	FALSE	FALSE	FALSE	FALSE	FALSE	FALSE	FALSE	FALSE	FALSE
Gm11613	ENSMUSG00000085586.1	NA	chr11:97644183-97660367	processed_transcript	0.534906	0.395447	0.723814	0.304994	0.6	0.11	0.557275	FALSE	TRUE	FALSE	FALSE	FALSE	FALSE	TRUE	FALSE	TRUE	TRUE	TRUE	FALSE
1700016P03Rik	ENSMUSG00000085609.1	NA	chr11:75172559-75177633	processed_transcript	0.137942	0.0393306	0.096061	0.177887	1.09	0.53	0.62782	FALSE	TRUE	FALSE	FALSE	FALSE	FALSE	TRUE	TRUE	FALSE	FALSE	TRUE	FALSE
1700123M08Rik	ENSMUSG00000085614.1	NA	chr4:11966564-11994280	processed_transcript	0.924138	0.703857	0.784908	0.729807	-0.34	-0.49	0.630508	FALSE	FALSE	FALSE	FALSE	FALSE	FALSE	TRUE	TRUE	FALSE	FALSE	TRUE	FALSE
A330035P11Rik	ENSMUSG00000085615.2	NA	chr14:122103429-122106974	processed_transcript	0.387162	0.735808	0.446752	0.603611	0.34	-0.65	NA	FALSE	FALSE	FALSE	FALSE	FALSE	FALSE	TRUE	TRUE	TRUE	FALSE	FALSE	FALSE
Gm12898	ENSMUSG00000085626.1	NA	chr4:119223173-119224815	processed_transcript	2.7272	2.47546	2.84442	2.67027	-1	0.12	NA	FALSE	FALSE	FALSE	FALSE	FALSE	FALSE	FALSE	FALSE	FALSE	FALSE	FALSE	FALSE
Gm15290	ENSMUSG00000085634.1	NA	chr13:111522435-111549911	lincRNA	0.0985637	0.00296094	0.397272	0	-0.6	NA	0.0133421	FALSE	FALSE	FALSE	FALSE	TRUE	FALSE	FALSE	FALSE	FALSE	FALSE	FALSE	FALSE
Gm11769	ENSMUSG00000085636.1	NA	chr11:120150561-120152341	processed_transcript	1.45901	3.0081	2.40126	1.67726	-0.13	-0.31	0.277826	FALSE	FALSE	FALSE	FALSE	FALSE	FALSE	TRUE	TRUE	TRUE	TRUE	TRUE	FALSE
Gm12536	ENSMUSG00000085654.1	NA	chr4:57300095-57307305	lincRNA	0.107957	0.0140147	0.363605	0.0144447	-0.91	1.36	NA	FALSE	FALSE	FALSE	FALSE	FALSE	FALSE	TRUE	TRUE	TRUE	FALSE	TRUE	FALSE
Gm12059	ENSMUSG00000085665.1	linc1599	chr11:23067997-23075574	processed_transcript	0.164555	0.084837	0.187541	0.145346	-0.84	-1.4	0.0238564	FALSE	FALSE	FALSE	FALSE	FALSE	FALSE	TRUE	TRUE	TRUE	FALSE	TRUE	FALSE
Gm12992	ENSMUSG00000085667.1	NA	chr4:131899477-131920029	processed_transcript	4.61068	6.93169	7.06276	7.10471	0.5	-0.46	0.0384819	FALSE	FALSE	FALSE	FALSE	FALSE	FALSE	TRUE	FALSE	FALSE	FALSE	FALSE	FALSE
Gm14817	ENSMUSG00000085669.1	NA	chrX:73795214-73797616	processed_transcript	26.1375	6.5303	24.6565	3.83913	-0.52	-0.22	0.00634773	TRUE	FALSE	FALSE	FALSE	FALSE	FALSE	FALSE	FALSE	FALSE	FALSE	FALSE	FALSE
Gm14267	ENSMUSG00000085682.1	NA	chr2:166502100-166505584	lincRNA	0.337341	0.0729229	0.203021	0.0610568	0.98	-1.09	0.00610552	TRUE	FALSE	FALSE	FALSE	FALSE	FALSE	FALSE	FALSE	FALSE	FALSE	FALSE	FALSE
Gm16153	ENSMUSG00000085687.1	NA	chr10:4409032-4423369	processed_transcript	0.507732	0.298021	1.03144	1.05381	0.84	0.91	0.0402878	FALSE	FALSE	FALSE	FALSE	FALSE	FALSE	FALSE	FALSE	FALSE	FALSE	FALSE	FALSE
4921531C22Rik	ENSMUSG00000085704.1	NA	chr2:179975992-179979013	processed_transcript	0.266648	0.899754	0.328001	0.584487	-0.68	-0.4	5.64514e-09	TRUE	FALSE	FALSE	FALSE	FALSE	FALSE	TRUE	TRUE	TRUE	FALSE	TRUE	FALSE
Gm16046	ENSMUSG00000085705.1	NA	chr17:13675661-13683516	processed_transcript	1.18214	0.0196743	0.112534	0.032252	1	1.51	8.4845e-13	TRUE	FALSE	FALSE	FALSE	FALSE	FALSE	TRUE	FALSE	TRUE	TRUE	FALSE	FALSE
Gm14211	ENSMUSG00000085709.1	NA	chr2:135686173-135693154	lincRNA	0.108744	0.0649141	0.198718	0.189921	0.93	0.96	NA	FALSE	FALSE	FALSE	FALSE	FALSE	FALSE	FALSE	FALSE	FALSE	FALSE	FALSE	FALSE
5430405H02Rik	ENSMUSG00000085741.3	NA	chr2:156844350-156862963	processed_transcript	31.9535	45.977	21.9705	18.5772	-0.56	-0.41	8.42008e-05	TRUE	FALSE	FALSE	FALSE	FALSE	FALSE	TRUE	TRUE	TRUE	FALSE	TRUE	TRUE
8430419K02Rik	ENSMUSG00000085743.1	NA	chr11:18845850-18874309	processed_transcript	0.00579795	0.135079	0.00790471	0.237871	1.41	0.39	0.0034408	TRUE	FALSE	FALSE	FALSE	TRUE	FALSE	FALSE	FALSE	FALSE	FALSE	FALSE	FALSE
2410114N07Rik	ENSMUSG00000085824.2	NA	chr4:34906123-34911481	processed_transcript	0.80261	0.0124414	0.501854	0	-0.13	NA	1.20696e-12	TRUE	FALSE	FALSE	FALSE	TRUE	FALSE	FALSE	FALSE	TRUE	TRUE	FALSE	FALSE
Gm15612	ENSMUSG00000085828.1	NA	chr6:88842853-88847274	processed_transcript	0.0947698	1.48168	0.0857338	1.26131	-0.82	0.17	1.31025e-19	TRUE	FALSE	FALSE	FALSE	FALSE	FALSE	TRUE	TRUE	FALSE	FALSE	TRUE	FALSE
2410003L11Rik	ENSMUSG00000085860.1	linc1450	chr11:97598510-97622893	processed_transcript	12.913	0.00221617	27.1552	1.36505	-0.67	-0.01	6.49582e-25	TRUE	FALSE	FALSE	FALSE	TRUE	FALSE	TRUE	FALSE	FALSE	FALSE	FALSE	FALSE
2610507I01Rik	ENSMUSG00000085882.1	NA	chr11:59199835-59202385	processed_transcript	0.634748	1.82195	0.0882197	0.285892	0.33	0.51	3.62396e-07	TRUE	FALSE	FALSE	FALSE	FALSE	FALSE	TRUE	TRUE	FALSE	FALSE	TRUE	FALSE
Gm15342	ENSMUSG00000085884.1	NA	chr16:96036089-96038743	processed_transcript	1.13667	0.16705	1.97779	1.24264	0.9	0.29	1.53811e-13	TRUE	FALSE	FALSE	FALSE	FALSE	FALSE	FALSE	FALSE	FALSE	FALSE	FALSE	FALSE
D030047H15Rik	ENSMUSG00000085886.1	NA	chr7:4126339-4136926	processed_transcript	0.564	8.8679	0.548925	6.67291	0.68	-0.26	0.07616	FALSE	FALSE	FALSE	FALSE	FALSE	FALSE	TRUE	TRUE	FALSE	FALSE	TRUE	FALSE
Gm14634	ENSMUSG00000085891.2	NA	chrX:12762277-12821492	processed_transcript	0.154556	0.258586	0.164621	0.206493	0.13	0.57	0.382751	FALSE	FALSE	FALSE	FALSE	FALSE	FALSE	TRUE	TRUE	FALSE	FALSE	FALSE	FALSE
Gm15832	ENSMUSG00000085894.1	NA	chr1:39547569-39552002	processed_transcript	1.77283	0.386454	1.44718	1.28557	0.87	0.71	1.3159e-05	TRUE	FALSE	FALSE	TRUE	FALSE	FALSE	FALSE	FALSE	FALSE	FALSE	FALSE	FALSE
Trp53cor1	ENSMUSG00000085912.1	linc1593	chr17:29057473-29078961	lincRNA	0.122104	2.07118	0.675499	1.22599	0.18	-0.07	NA	FALSE	FALSE	FALSE	FALSE	FALSE	FALSE	TRUE	FALSE	TRUE	FALSE	TRUE	FALSE
Gm13421	ENSMUSG00000085929.1	linc1505	chr2:27540425-27543362	processed_transcript	0.739268	0.420699	2.18564	1.15382	-0.88	-0.3	0.165578	FALSE	FALSE	FALSE	FALSE	FALSE	FALSE	TRUE	TRUE	TRUE	FALSE	TRUE	FALSE
Gm15556	ENSMUSG00000085932.1	NA	chr17:47922377-47923429	lincRNA	0.0986743	0.105862	0.0712801	0.263996	2.99	-0.62	0.640389	FALSE	FALSE	FALSE	FALSE	FALSE	FALSE	TRUE	FALSE	FALSE	TRUE	FALSE	FALSE
2610307P16Rik	ENSMUSG00000085936.2	NA	chr13:28460033-28885620	processed_transcript	0.651687	0.729318	1.30989	5.326	-0.62	0.8	0.509036	FALSE	TRUE	FALSE	FALSE	FALSE	FALSE	FALSE	FALSE	TRUE	FALSE	FALSE	FALSE
1700003D09Rik	ENSMUSG00000085944.1	NA	chr11:98350717-98358283	processed_transcript	0.0500514	0.157647	0.0991101	0.100944	-0.8	-0.27	NA	FALSE	FALSE	FALSE	FALSE	FALSE	FALSE	TRUE	TRUE	FALSE	FALSE	FALSE	FALSE
2310014F06Rik	ENSMUSG00000085945.2	NA	chr7:112613467-112680058	processed_transcript	0.0179862	0.229593	0.0191433	0.493769	0.89	0.4	0.00131117	TRUE	FALSE	FALSE	TRUE	FALSE	FALSE	TRUE	TRUE	TRUE	FALSE	TRUE	FALSE
Gm12356	ENSMUSG00000085955.1	NA	chr11:98682920-98683415	processed_transcript	0.283427	0.22863	0.379098	0.140264	-0.72	0.04	0.337158	FALSE	FALSE	FALSE	FALSE	FALSE	FALSE	TRUE	TRUE	FALSE	FALSE	FALSE	FALSE
4930481B07Rik	ENSMUSG00000085956.1	NA	chr3:95015624-95020138	processed_transcript	0.67946	0.427297	3.34876	2.19301	-0.55	-0.64	0.149717	FALSE	FALSE	FALSE	FALSE	FALSE	FALSE	TRUE	TRUE	TRUE	FALSE	TRUE	FALSE
Gm13572	ENSMUSG00000085975.1	NA	chr2:60037140-60038837	lincRNA	0.296831	0.116065	0.439381	0.463024	-0.21	-0.48	0.106436	FALSE	FALSE	FALSE	FALSE	FALSE	FALSE	FALSE	TRUE	FALSE	FALSE	TRUE	FALSE
9530051G07Rik	ENSMUSG00000085982.1	NA	chrX:153037628-153072915	processed_transcript	0.063108	0.13856	0.059883	0.19541	0.49	0.55	0.0290166	FALSE	FALSE	FALSE	FALSE	FALSE	FALSE	TRUE	TRUE	TRUE	FALSE	TRUE	FALSE
1700001G11Rik	ENSMUSG00000085984.2	linc1607	chr14:66295333-66297129	processed_transcript	0.514164	0.503473	0.417991	0.333887	-0.31	-1.75	0.907378	FALSE	FALSE	FALSE	FALSE	FALSE	FALSE	TRUE	TRUE	TRUE	FALSE	TRUE	FALSE
Gm2788	ENSMUSG00000085995.1	NA	chr7:48877957-48886608	processed_transcript	0.433292	0.309601	0.437733	0.756868	0.11	-0.35	0.472416	FALSE	FALSE	FALSE	FALSE	FALSE	FALSE	TRUE	TRUE	FALSE	FALSE	FALSE	FALSE
AW822252	ENSMUSG00000085998.2	NA	chrX:53696867-53716772	processed_transcript	1.38786	0.0611426	1.50254	0.0921908	-0.8	0.36	2.67578e-28	TRUE	FALSE	FALSE	FALSE	FALSE	FALSE	FALSE	FALSE	FALSE	FALSE	FALSE	FALSE
Gm13448	ENSMUSG00000086001.1	NA	chr2:34912870-34916014	processed_transcript	0.212553	0.0219328	0.287972	0.0883344	-0.42	-0.06	7.15915e-05	TRUE	FALSE	FALSE	FALSE	FALSE	FALSE	FALSE	TRUE	FALSE	FALSE	FALSE	TRUE
B230206L02Rik	ENSMUSG00000086003.2	linc1448	chr11:94133484-94155776	processed_transcript	9.53126	16.6606	3.55681	2.53617	-0.63	-0.35	0.0486066	FALSE	FALSE	FALSE	FALSE	FALSE	FALSE	FALSE	FALSE	FALSE	FALSE	TRUE	FALSE
Gm8817	ENSMUSG00000086008.3	NA	chrX:167063193-167070380	lincRNA	0.237713	0.15577	0.180978	0.0645853	-0.32	-2.21	0.363221	FALSE	FALSE	FALSE	FALSE	TRUE	FALSE	FALSE	FALSE	FALSE	FALSE	FALSE	FALSE
Gm15706	ENSMUSG00000086013.1	linc1630	chr6:145250528-145251849	lincRNA	1.51137	1.82005	1.38776	0.789379	-0.34	-0.67	0.425023	FALSE	FALSE	FALSE	FALSE	FALSE	FALSE	TRUE	TRUE	FALSE	FALSE	FALSE	FALSE
4833417C18Rik	ENSMUSG00000086015.1	linc1603	chr11:95858864-95861044	processed_transcript	2.74722	0.380195	2.94339	0.297671	0.41	0.8	6.36262e-20	TRUE	FALSE	FALSE	FALSE	FALSE	FALSE	TRUE	TRUE	TRUE	TRUE	TRUE	FALSE
Gm15929	ENSMUSG00000086032.1	NA	chr7:3666251-3670278	processed_transcript	0.367035	0.202439	0.214821	0.440667	0.13	0.36	0.374974	FALSE	FALSE	FALSE	FALSE	FALSE	FALSE	TRUE	TRUE	TRUE	FALSE	TRUE	FALSE
Gm15201	ENSMUSG00000086034.1	NA	chrX:162735077-162736613	processed_transcript	0.108394	0.0111645	0.0979195	0	-0.07	Inf	0.00276809	TRUE	FALSE	FALSE	FALSE	FALSE	FALSE	FALSE	FALSE	TRUE	FALSE	FALSE	FALSE
Gm12610	ENSMUSG00000086035.1	NA	chr4:89421847-89463487	processed_transcript	0.0292011	0.285725	0.010805	0.560263	1.48	0.27	0.0732993	FALSE	FALSE	FALSE	FALSE	FALSE	FALSE	FALSE	FALSE	FALSE	FALSE	TRUE	FALSE
9530046B11Rik	ENSMUSG00000086047.1	NA	chr5:117115217-117118723	processed_transcript	0.130076	0.155929	0.224575	0.168329	-0.29	-0.44	0.353338	FALSE	FALSE	FALSE	FALSE	FALSE	FALSE	TRUE	TRUE	TRUE	FALSE	TRUE	FALSE
1700120G11Rik	ENSMUSG00000086068.1	NA	chr4:14219495-14237450	lincRNA	1.65628	2.82055	2.31371	2.13262	-0.55	-0.34	NA	FALSE	FALSE	FALSE	FALSE	TRUE	FALSE	FALSE	FALSE	FALSE	FALSE	FALSE	FALSE
Gm13708	ENSMUSG00000086069.1	NA	chr2:73459704-73477602	lincRNA	0.0440326	0.112488	0.107997	0.450726	0.49	0.08	NA	FALSE	FALSE	FALSE	FALSE	FALSE	TRUE	FALSE	FALSE	FALSE	FALSE	TRUE	FALSE
Gm15728	ENSMUSG00000086075.1	NA	chr5:117389138-117393498	processed_transcript	0.810627	0.658624	0.48661	0.136472	-0.23	-0.82	0.236215	FALSE	FALSE	FALSE	FALSE	FALSE	FALSE	TRUE	TRUE	TRUE	FALSE	FALSE	FALSE
Gm12688	ENSMUSG00000086096.1	linc1623	chr4:99653606-99654983	lincRNA	3.52943	0	3.31383	0	0.04	NA	8.58053e-16	TRUE	FALSE	FALSE	FALSE	FALSE	FALSE	FALSE	FALSE	FALSE	FALSE	FALSE	FALSE
Gm11934	ENSMUSG00000086127.1	NA	chr4:33303568-33310137	processed_transcript	0.21346	0.0451114	0.175087	0.0226011	-0.82	1.04	0.001512	TRUE	FALSE	FALSE	FALSE	FALSE	FALSE	TRUE	TRUE	FALSE	FALSE	TRUE	FALSE
Gm16159	ENSMUSG00000086134.1	NA	chr8:25548660-25556083	processed_transcript	0.392088	1.40292	0.909174	2.7546	0.16	0.06	0.155997	FALSE	FALSE	FALSE	FALSE	FALSE	FALSE	FALSE	FALSE	FALSE	FALSE	FALSE	FALSE
Gm16196	ENSMUSG00000086154.1	NA	chr17:29014641-29015897	lincRNA	0.261045	0.0593459	0.161609	0.0748177	1.35	-Inf	0.0214463	FALSE	FALSE	FALSE	FALSE	FALSE	FALSE	FALSE	FALSE	FALSE	FALSE	FALSE	FALSE
9430041J12Rik	ENSMUSG00000086155.2	NA	chr7:4074124-4120728	processed_transcript	0.144941	0.24185	0.0906965	0.394921	0.9	0.01	NA	FALSE	FALSE	TRUE	FALSE	FALSE	FALSE	FALSE	FALSE	FALSE	FALSE	FALSE	FALSE
Pcsk2os1	ENSMUSG00000086171.2	NA	chr2:143535475-143547837	processed_transcript	0.134622	0.00795249	0.564633	0.0658737	-2.11	-3.06	0.00168009	TRUE	FALSE	FALSE	FALSE	FALSE	FALSE	FALSE	TRUE	TRUE	FALSE	FALSE	FALSE
Kis2	ENSMUSG00000086173.2	NA	chrX:52742562-52744960	processed_transcript	4.18375	0	5.25046	0.0475544	0.91	1.06	1.35202e-22	TRUE	TRUE	FALSE	FALSE	FALSE	FALSE	TRUE	FALSE	TRUE	TRUE	FALSE	FALSE
C230034O21Rik	ENSMUSG00000086181.1	NA	chr3:38874569-38888259	processed_transcript	0.0111434	0.563832	0.0132205	0.161997	-0.07	0.47	6.64543e-18	TRUE	FALSE	FALSE	FALSE	FALSE	FALSE	FALSE	FALSE	FALSE	FALSE	FALSE	FALSE
1700019E08Rik	ENSMUSG00000086202.1	NA	chr2:45696604-45698447	lincRNA	0.599526	0	2.01539	0	-0.48	NA	8.19539e-06	TRUE	FALSE	FALSE	FALSE	TRUE	FALSE	FALSE	FALSE	FALSE	FALSE	FALSE	FALSE
Mkln1os	ENSMUSG00000086212.2	NA	chr6:31366884-31398773	processed_transcript	0.229379	1.03011	0.0208714	0.250728	3.47	-1.26	0.00245333	TRUE	FALSE	FALSE	FALSE	FALSE	FALSE	TRUE	TRUE	FALSE	FALSE	FALSE	FALSE
A330040F15Rik	ENSMUSG00000086213.1	NA	chr19:12585867-12596566	processed_transcript	1.19208	0.448499	2.52666	2.11557	-0.23	-0.12	0.0827386	FALSE	FALSE	FALSE	FALSE	FALSE	FALSE	TRUE	TRUE	FALSE	FALSE	FALSE	FALSE
Gm13610	ENSMUSG00000086216.1	NA	chr2:32232781-32236382	processed_transcript	8.85347	11.0002	10.1732	14.0947	0.61	0.48	0.114825	FALSE	FALSE	FALSE	FALSE	FALSE	FALSE	TRUE	TRUE	TRUE	FALSE	TRUE	FALSE
Gm16170	ENSMUSG00000086245.1	NA	chr11:48843647-48853493	processed_transcript	0.277337	0.301581	0.651164	0.691065	0.51	0.48	0.783978	FALSE	FALSE	FALSE	FALSE	FALSE	FALSE	TRUE	TRUE	TRUE	FALSE	FALSE	FALSE
Gm15787	ENSMUSG00000086247.2	NA	chr5:110154399-110176504	processed_transcript	0.759289	0.618796	0.538913	0.903605	0.2	0.08	0.345296	FALSE	FALSE	FALSE	FALSE	TRUE	FALSE	TRUE	TRUE	FALSE	FALSE	TRUE	FALSE
3100003L05Rik	ENSMUSG00000086254.1	NA	chr7:124625669-124708935	processed_transcript	0.000242997	0.297566	0.000450284	0.231809	-0.07	-0.2	0.000770921	TRUE	FALSE	FALSE	FALSE	FALSE	FALSE	FALSE	TRUE	FALSE	FALSE	TRUE	FALSE
Gm12052	ENSMUSG00000086256.1	NA	chr11:22617407-22618487	lincRNA	0.190321	0.012654	0.381925	0	0.18	Inf	0.00580248	TRUE	FALSE	FALSE	FALSE	FALSE	FALSE	FALSE	FALSE	FALSE	FALSE	TRUE	FALSE
2810433D01Rik	ENSMUSG00000086283.2	NA	chr11:102619795-102624416	lincRNA	0.129604	0.0417035	0.0956698	0.455802	0.62	-1.75	0.122048	FALSE	FALSE	FALSE	FALSE	FALSE	FALSE	FALSE	FALSE	FALSE	TRUE	FALSE	FALSE
Gm15138	ENSMUSG00000086286.1	NA	chrX:151169699-151171764	lincRNA	0.246938	0.106355	1.07854	0.235359	0.21	-0.06	0.663627	FALSE	FALSE	FALSE	FALSE	FALSE	FALSE	TRUE	TRUE	FALSE	FALSE	TRUE	FALSE
Snhg12	ENSMUSG00000086290.3	NA	chr4:132308677-132311024	lincRNA	30.2686	9.41281	36.1549	10.6508	0.76	0.71	1.34918e-26	TRUE	FALSE	FALSE	TRUE	FALSE	FALSE	TRUE	TRUE	FALSE	FALSE	TRUE	FALSE
G630016G05Rik	ENSMUSG00000086308.1	NA	chr2:116067224-116085911	lincRNA	0.00442803	0.165623	0.0100319	0.699655	0.12	0.69	4.15234e-06	TRUE	FALSE	FALSE	FALSE	FALSE	FALSE	TRUE	TRUE	TRUE	FALSE	FALSE	FALSE
2210013O21Rik	ENSMUSG00000086316.2	NA	chrX:153723589-153741920	processed_transcript	11.6357	14.0921	9.42964	10.878	-0.7	-0.19	0.0867899	FALSE	FALSE	FALSE	FALSE	FALSE	FALSE	FALSE	TRUE	FALSE	TRUE	FALSE	FALSE
E130218I03Rik	ENSMUSG00000086322.2	NA	chr4:134243661-134245873	processed_transcript	10.7957	8.69972	11.193	3.44864	-0.83	-1.05	0.463218	FALSE	FALSE	FALSE	FALSE	FALSE	FALSE	TRUE	TRUE	FALSE	FALSE	TRUE	FALSE
2700033N17Rik	ENSMUSG00000086328.1	NA	chr2:116066217-116067444	lincRNA	0.183819	1.29493	0	2.61802	Inf	-0.14	5.26161e-09	TRUE	FALSE	FALSE	FALSE	FALSE	FALSE	TRUE	TRUE	TRUE	FALSE	FALSE	FALSE
Gm14233	ENSMUSG00000086329.1	NA	chr2:131298544-131299835	processed_transcript	1.96332	2.39503	1.44036	3.56164	0.6	0.51	NA	FALSE	FALSE	FALSE	FALSE	FALSE	FALSE	FALSE	FALSE	FALSE	FALSE	FALSE	FALSE
1700007J10Rik	ENSMUSG00000086330.2	NA	chr11:59725916-59740154	processed_transcript	0.442209	0.693803	0.937465	2.89417	0.45	0.72	0.886837	FALSE	FALSE	FALSE	FALSE	FALSE	FALSE	FALSE	FALSE	FALSE	FALSE	TRUE	FALSE
Gm12510	ENSMUSG00000086346.1	NA	chr4:55450683-55465814	lincRNA	0.571646	0.00223204	0.128011	0	0.92	NA	0.000169239	TRUE	FALSE	FALSE	FALSE	FALSE	FALSE	FALSE	FALSE	TRUE	TRUE	FALSE	FALSE
1700017J07Rik	ENSMUSG00000086348.1	NA	chr2:168978267-168978906	lincRNA	0.257248	0	0.176025	0.0733932	0.88	-Inf	0.00500156	TRUE	FALSE	FALSE	FALSE	FALSE	TRUE	FALSE	FALSE	FALSE	FALSE	FALSE	FALSE
Gm13830	ENSMUSG00000086368.1	NA	chr5:115301119-115319208	processed_transcript	0.334332	0.0773087	0.112988	0.239893	0.21	0.18	0.00400236	TRUE	FALSE	FALSE	FALSE	FALSE	FALSE	TRUE	TRUE	FALSE	FALSE	TRUE	FALSE
Ftx	ENSMUSG00000086370.3	NA	chrX:103560906-103623754	lincRNA	2.26299	0.691559	3.60975	2.82563	0.49	0.18	3.23671e-05	TRUE	TRUE	FALSE	FALSE	FALSE	FALSE	TRUE	TRUE	FALSE	FALSE	TRUE	FALSE
Gm12108	ENSMUSG00000086386.1	NA	chr11:32095260-32101228	lincRNA	0.0027924	0.515863	0.0144817	0.310795	-0.07	-0.02	NA	FALSE	FALSE	FALSE	FALSE	FALSE	FALSE	FALSE	FALSE	FALSE	FALSE	FALSE	FALSE
Gm15998	ENSMUSG00000086389.1	NA	chr3:89315438-89318907	processed_transcript	0.361392	0.413688	0.183738	0.431921	0.17	0.21	0.600711	FALSE	FALSE	FALSE	FALSE	FALSE	FALSE	TRUE	FALSE	FALSE	FALSE	FALSE	FALSE
1810019D21Rik	ENSMUSG00000086390.2	linc1634	chr8:106135399-106138525	processed_transcript	0.536341	0.00180241	0.491146	0.0395009	0.06	0.07	1.91596e-07	TRUE	FALSE	FALSE	FALSE	FALSE	FALSE	TRUE	FALSE	FALSE	FALSE	FALSE	FALSE
Gm15559	ENSMUSG00000086401.1	NA	chr5:110770948-110779260	processed_transcript	0.363564	0.218966	0.36086	0.198577	-0.2	-0.27	3.87091e-05	TRUE	FALSE	FALSE	FALSE	FALSE	FALSE	TRUE	TRUE	FALSE	FALSE	TRUE	FALSE
Gm6787	ENSMUSG00000086404.1	NA	chrX:8097086-8106701	processed_transcript	0.124536	0.158205	0.0537033	0.125186	1.26	-0.82	0.532546	FALSE	FALSE	FALSE	FALSE	FALSE	FALSE	FALSE	FALSE	FALSE	FALSE	FALSE	FALSE
Gm14123	ENSMUSG00000086407.1	NA	chr2:150606232-150610254	processed_transcript	0.111732	0.126403	0.10043	0.0793937	0.1	0.44	0.0946612	FALSE	FALSE	FALSE	FALSE	FALSE	FALSE	FALSE	FALSE	FALSE	FALSE	FALSE	FALSE
4930500J02Rik	ENSMUSG00000086454.2	linc1509	chr2:104559162-104571429	processed_transcript	100.934	0.0909593	48.6203	0.244282	0.1	0.02	3.89327e-92	TRUE	FALSE	FALSE	FALSE	TRUE	FALSE	FALSE	FALSE	FALSE	FALSE	FALSE	FALSE
1700030C12Rik	ENSMUSG00000086459.2	NA	chr11:23497752-23499661	processed_transcript	0.143965	0.11751	0.821227	0.0727405	-2.73	-0.9	NA	FALSE	FALSE	FALSE	FALSE	FALSE	FALSE	TRUE	TRUE	FALSE	FALSE	TRUE	FALSE
Gm12139	ENSMUSG00000086475.1	NA	chr11:41218836-41221096	lincRNA	205.495	0.188211	31.438	0.168969	0.33	-0.19	7.11811e-13	TRUE	FALSE	FALSE	FALSE	TRUE	FALSE	FALSE	FALSE	FALSE	FALSE	FALSE	FALSE
Gm15506	ENSMUSG00000086477.1	NA	chr7:98682335-98702928	processed_transcript	0.276898	0.920793	0.10998	0.499082	0.88	0.57	0.000137286	TRUE	FALSE	FALSE	FALSE	FALSE	FALSE	TRUE	TRUE	FALSE	FALSE	TRUE	FALSE
Gm13778	ENSMUSG00000086495.2	NA	chr2:91044091-91053933	processed_transcript	0.28354	0.331007	0.118096	0.239897	0.41	0.56	0.615599	FALSE	FALSE	FALSE	FALSE	FALSE	FALSE	TRUE	TRUE	FALSE	FALSE	TRUE	FALSE
B130055M24Rik	ENSMUSG00000086502.1	NA	chr7:127448635-127460360	processed_transcript	1.65025	1.69551	1.81279	4.43909	0.13	0.34	0.65694	FALSE	FALSE	FALSE	FALSE	FALSE	FALSE	TRUE	TRUE	FALSE	FALSE	FALSE	FALSE
Xist	ENSMUSG00000086503.3	NA	chrX:103460374-103483217	lincRNA	0.734015	0.0144231	3.33185	0.00976851	0.88	1.43	1.19769e-23	TRUE	FALSE	FALSE	FALSE	FALSE	FALSE	FALSE	FALSE	FALSE	FALSE	FALSE	FALSE
Has2os	ENSMUSG00000086541.3	NA	chr15:56689943-56778399	processed_transcript	0.125544	0.052491	0.339928	0.415621	-2.16	0.19	0.143455	FALSE	FALSE	FALSE	FALSE	FALSE	FALSE	TRUE	TRUE	FALSE	FALSE	FALSE	FALSE
Gm13648	ENSMUSG00000086549.1	NA	chr4:156052714-156059802	processed_transcript	0.486546	0.000795111	0.318031	0	-0.11	NA	8.28321e-10	TRUE	TRUE	FALSE	FALSE	FALSE	FALSE	TRUE	FALSE	FALSE	FALSE	FALSE	FALSE
Gm13372	ENSMUSG00000086560.1	NA	chr2:28025416-28030437	processed_transcript	0.145392	0.0682656	0.344178	1.15467	0.77	0.71	0.275674	FALSE	FALSE	FALSE	FALSE	FALSE	FALSE	FALSE	FALSE	FALSE	FALSE	FALSE	FALSE
Gm14136	ENSMUSG00000086563.1	NA	chr2:150704535-150706876	lincRNA	0.231792	0	0.109091	0	-1.02	NA	NA	FALSE	FALSE	FALSE	FALSE	TRUE	FALSE	FALSE	FALSE	FALSE	FALSE	FALSE	FALSE
9130020K20Rik	ENSMUSG00000086568.2	NA	chr4:136347285-136350334	lincRNA	0.259198	0.101662	0.504174	0.660379	0.36	0.17	0.00166703	TRUE	FALSE	FALSE	FALSE	FALSE	FALSE	FALSE	FALSE	FALSE	FALSE	FALSE	FALSE
Gm12915	ENSMUSG00000086589.1	NA	chr4:124735729-124751354	processed_transcript	0.0175261	0.106652	0.0575371	0.0950665	-0.21	-1.47	0.00150575	TRUE	TRUE	FALSE	FALSE	FALSE	FALSE	TRUE	TRUE	FALSE	FALSE	TRUE	FALSE
C030005K06Rik	ENSMUSG00000086600.3	NA	chr18:50042729-50053844	processed_transcript	0.0475652	0.126826	0.17118	0.813298	0.89	0.08	0.20542	FALSE	FALSE	FALSE	FALSE	FALSE	FALSE	TRUE	TRUE	TRUE	TRUE	TRUE	FALSE
Gm15609	ENSMUSG00000086602.1	NA	chr15:89520095-89523677	processed_transcript	0.0931606	0.101634	0.306231	0.709693	0.31	0.39	0.568093	FALSE	FALSE	FALSE	FALSE	FALSE	FALSE	FALSE	FALSE	FALSE	FALSE	FALSE	FALSE
Gm13620	ENSMUSG00000086603.1	NA	chr2:60125095-60125819	lincRNA	0.409528	0.871462	0.466077	1.97315	0.47	0.88	NA	FALSE	FALSE	FALSE	FALSE	FALSE	FALSE	TRUE	TRUE	TRUE	TRUE	TRUE	FALSE
Gm14290	ENSMUSG00000086605.1	NA	chr2:167098793-167101826	lincRNA	0.284788	0.733427	0.24175	0.607228	0.55	-0.06	0.00104295	TRUE	FALSE	FALSE	FALSE	FALSE	FALSE	FALSE	FALSE	FALSE	FALSE	FALSE	FALSE
4930511M06Rik	ENSMUSG00000086607.2	NA	chr18:57373454-57552397	processed_transcript	0.141447	0.104566	0.363529	0.279906	-0.18	0.22	0.457388	FALSE	FALSE	FALSE	FALSE	FALSE	FALSE	FALSE	FALSE	FALSE	FALSE	FALSE	FALSE
2810403D21Rik	ENSMUSG00000086629.2	NA	chrX:108834477-108974906	processed_transcript	1.63723	1.64478	1.9644	1.55758	-1.54	-1.28	0.671145	FALSE	FALSE	FALSE	FALSE	TRUE	TRUE	FALSE	TRUE	FALSE	FALSE	TRUE	FALSE
4930405A21Rik	ENSMUSG00000086638.2	NA	chr2:156714539-156720909	processed_transcript	0.395785	0.318004	0.475886	0.812326	0.45	-0.6	0.423165	FALSE	FALSE	FALSE	FALSE	FALSE	FALSE	TRUE	TRUE	TRUE	FALSE	TRUE	FALSE
Gm13663	ENSMUSG00000086641.1	NA	chr2:71747506-71750200	processed_transcript	0.366693	0	0.297331	0	-1.21	NA	5.324e-07	TRUE	FALSE	FALSE	FALSE	FALSE	FALSE	FALSE	FALSE	FALSE	FALSE	FALSE	FALSE
5133400J02Rik	ENSMUSG00000086646.2	linc1260	chr11:51189832-51220418	lincRNA	3.22162	0.0025792	5.88852	0.19205	0.08	0.61	1.08777e-18	TRUE	FALSE	FALSE	FALSE	TRUE	FALSE	TRUE	FALSE	FALSE	FALSE	FALSE	FALSE
Gm15286	ENSMUSG00000086649.1	NA	chr13:111580260-111644830	processed_transcript	0.974044	0.0103023	2.22285	0	-0.78	Inf	4.89986e-08	TRUE	FALSE	FALSE	FALSE	TRUE	FALSE	FALSE	FALSE	FALSE	FALSE	FALSE	FALSE
Gm14260	ENSMUSG00000086658.1	NA	chr2:168986565-168987373	lincRNA	0.879554	0.0481559	1.48489	1.11708	0.61	0.45	0.00371443	TRUE	FALSE	FALSE	FALSE	TRUE	FALSE	FALSE	FALSE	FALSE	FALSE	FALSE	FALSE
Gm13067	ENSMUSG00000086665.1	NA	chr4:150049012-150056976	lincRNA	0.736702	0.580464	2.19913	2.14443	0.48	0.23	0.925533	FALSE	FALSE	FALSE	FALSE	FALSE	FALSE	TRUE	FALSE	FALSE	FALSE	FALSE	FALSE
Gm16023	ENSMUSG00000086682.1	NA	chr4:155608299-155624755	processed_transcript	1.29005	1.718	2.43859	2.5906	0.25	0.38	0.14015	FALSE	FALSE	FALSE	FALSE	FALSE	FALSE	TRUE	TRUE	FALSE	FALSE	TRUE	FALSE
F630206G17Rik	ENSMUSG00000086686.1	NA	chr11:45808086-45841171	processed_transcript	23.3061	13.0558	14.4545	3.0576	-1.29	-1.7	NA	FALSE	TRUE	FALSE	FALSE	FALSE	FALSE	FALSE	FALSE	FALSE	FALSE	FALSE	FALSE
A730081D07Rik	ENSMUSG00000086693.1	NA	chr13:40956413-41001151	processed_transcript	0.752925	0.0606796	1.58783	0.273113	-0.34	0.08	0.000150189	TRUE	FALSE	FALSE	FALSE	FALSE	FALSE	TRUE	TRUE	FALSE	FALSE	FALSE	FALSE
0610009E02Rik	ENSMUSG00000086714.1	NA	chr2:26445695-26459390	processed_transcript	0.460458	0.53632	0.362139	0.535862	0.44	0.08	0.000102618	TRUE	FALSE	FALSE	FALSE	FALSE	FALSE	TRUE	TRUE	FALSE	FALSE	TRUE	TRUE
Gm11629	ENSMUSG00000086716.1	NA	chr11:98022954-98026745	processed_transcript	0.0482844	0.180089	0.244621	0.136191	-1.26	-2.95	0.171402	FALSE	FALSE	FALSE	FALSE	FALSE	FALSE	TRUE	TRUE	FALSE	FALSE	FALSE	FALSE
A630052C17Rik	ENSMUSG00000086725.1	NA	chr11:29170908-29173558	processed_transcript	2.43477	1.12899	2.79212	2.34798	0.38	-0.09	2.20991e-08	TRUE	FALSE	FALSE	FALSE	FALSE	FALSE	TRUE	TRUE	FALSE	FALSE	TRUE	FALSE
Gm11607	ENSMUSG00000086730.2	NA	chr1:63200312-63207967	processed_transcript	5.36505	0.00529427	9.41991	0	-0.37	NA	1.56798e-14	TRUE	FALSE	FALSE	FALSE	FALSE	FALSE	TRUE	FALSE	TRUE	FALSE	FALSE	FALSE
Gm16201	ENSMUSG00000086742.2	NA	chr7:139950395-139978977	processed_transcript	0.126006	0.00778765	0.220567	0.0315793	0.21	1.67	1.15352e-14	TRUE	TRUE	FALSE	FALSE	FALSE	FALSE	TRUE	FALSE	FALSE	TRUE	FALSE	FALSE
Gm13261	ENSMUSG00000086748.1	linc1319	chr2:10339282-10374041	processed_transcript	3.78732	0.00154034	1.62933	0.0350335	-0.06	-3.6	6.37005e-19	TRUE	FALSE	FALSE	FALSE	FALSE	FALSE	TRUE	TRUE	FALSE	FALSE	FALSE	FALSE
Gm11827	ENSMUSG00000086765.2	NA	chr4:11122804-11126998	lincRNA	0.118422	0.0946201	0.139867	0.133883	-0.86	-0.49	0.722555	FALSE	FALSE	FALSE	FALSE	FALSE	FALSE	FALSE	FALSE	TRUE	TRUE	FALSE	FALSE
E130102H24Rik	ENSMUSG00000086782.2	NA	chr4:101346530-101356735	lincRNA	8.39964	0.435371	5.38955	1.72506	0.48	0.69	1.05034e-30	TRUE	TRUE	FALSE	FALSE	FALSE	FALSE	TRUE	TRUE	FALSE	FALSE	TRUE	FALSE
1700029M20Rik	ENSMUSG00000086788.2	NA	chr4:135626654-135630198	lincRNA	0.168072	0	0.0961568	0	-Inf	NA	4.95697e-07	TRUE	FALSE	FALSE	FALSE	FALSE	FALSE	FALSE	FALSE	TRUE	FALSE	FALSE	FALSE
4930502E09Rik	ENSMUSG00000086799.1	NA	chr11:84829177-84830868	processed_transcript	0.0970085	0.0509074	0.221727	0.164237	0.77	1.11	0.834368	FALSE	FALSE	FALSE	FALSE	FALSE	FALSE	TRUE	TRUE	FALSE	FALSE	FALSE	FALSE
C330013F16Rik	ENSMUSG00000086807.2	linc1413	chrX:139240225-139357738	processed_transcript	4.05834	0.00249847	3.73827	0.000295418	-0.42	5.01	1.1403e-24	TRUE	FALSE	FALSE	FALSE	TRUE	FALSE	TRUE	FALSE	FALSE	FALSE	FALSE	FALSE
Gm13110	ENSMUSG00000086810.1	linc1346	chr4:154645753-154655318	processed_transcript	2.3832	0.00383603	1.74643	0	0.08	Inf	6.6221e-32	TRUE	FALSE	FALSE	FALSE	FALSE	FALSE	TRUE	FALSE	TRUE	FALSE	FALSE	FALSE
Gm13657	ENSMUSG00000086813.1	linc1508	chr2:75777187-75782306	processed_transcript	1.28917	0.0201771	0.489054	0.0135634	-0.78	-Inf	2.02175e-25	TRUE	FALSE	FALSE	FALSE	FALSE	FALSE	TRUE	FALSE	FALSE	TRUE	FALSE	FALSE
Gm16726	ENSMUSG00000086816.1	NA	chr19:46264538-46267669	processed_transcript	0.234234	0.842812	0.610719	0.765048	-0.93	0.58	0.318277	FALSE	FALSE	FALSE	FALSE	FALSE	FALSE	FALSE	FALSE	FALSE	FALSE	FALSE	FALSE
Gm15675	ENSMUSG00000086825.1	NA	chr1:130429780-130437191	lincRNA	0.634595	0.0108263	0.192255	0.0282929	1.25	1.44	1.23551e-14	TRUE	FALSE	FALSE	FALSE	FALSE	TRUE	FALSE	FALSE	FALSE	FALSE	FALSE	FALSE
Gm16618	ENSMUSG00000086837.1	NA	chr16:20511132-20517766	processed_transcript	0.786738	0.0960811	0.659425	0.206611	0.88	0.74	6.33561e-11	TRUE	FALSE	FALSE	FALSE	FALSE	FALSE	FALSE	TRUE	FALSE	FALSE	TRUE	FALSE
2410006H16Rik	ENSMUSG00000086841.1	NA	chr11:62602876-62604807	processed_transcript	201.107	106.93	122.483	57.6891	-0.03	-0.25	0.0254543	FALSE	FALSE	FALSE	TRUE	FALSE	FALSE	TRUE	TRUE	FALSE	FALSE	TRUE	FALSE
B230206H07Rik	ENSMUSG00000086844.1	NA	chr7:141359140-141365110	processed_transcript	0.691038	0.00635102	1.16293	0	-0.06	Inf	3.72932e-06	TRUE	FALSE	FALSE	FALSE	FALSE	FALSE	FALSE	FALSE	FALSE	FALSE	FALSE	FALSE
Tbx3os2	ENSMUSG00000086847.1	NA	chr5:119685094-119691218	processed_transcript	0.302702	0.00552676	0.118823	0	0.68	Inf	3.66719e-07	TRUE	FALSE	FALSE	FALSE	FALSE	FALSE	FALSE	FALSE	FALSE	FALSE	FALSE	FALSE
A430108G06Rik	ENSMUSG00000086851.1	NA	chr11:53564687-53567313	processed_transcript	0.0421265	0.197918	0.0551735	0.155122	-1.07	-0.56	0.000288026	TRUE	FALSE	FALSE	FALSE	FALSE	FALSE	TRUE	TRUE	FALSE	FALSE	FALSE	FALSE
2810008D09Rik	ENSMUSG00000086859.3	linc1451	chr11:117076789-117078955	lincRNA	18.8189	11.9604	15.3684	8.98257	0.39	0.54	3.84579e-05	TRUE	FALSE	FALSE	TRUE	FALSE	FALSE	TRUE	TRUE	TRUE	FALSE	FALSE	FALSE
Gm14225	ENSMUSG00000086872.1	NA	chr2:156445032-156447608	lincRNA	0.242818	0.0351935	0.41845	0.0134765	-0.66	2.27	0.00911024	TRUE	FALSE	FALSE	FALSE	FALSE	FALSE	FALSE	FALSE	TRUE	TRUE	FALSE	FALSE
Gm15672	ENSMUSG00000086873.1	NA	chr5:139147575-139150693	processed_transcript	0.326492	0.0970273	0.632878	0.283533	0.81	0.1	0.0665781	FALSE	FALSE	FALSE	FALSE	FALSE	FALSE	TRUE	TRUE	FALSE	FALSE	TRUE	FALSE
A230072C01Rik	ENSMUSG00000086877.2	linc1592	chrX:20961683-20986737	processed_transcript	1.5208	0.800012	1.53869	1.76093	0.43	0.25	0.0357419	FALSE	FALSE	FALSE	FALSE	FALSE	FALSE	TRUE	TRUE	FALSE	FALSE	FALSE	FALSE
Gm13404	ENSMUSG00000086904.1	NA	chr2:33978245-33980324	lincRNA	0.521905	0	0.25248	0.0177097	0.65	-Inf	NA	FALSE	FALSE	FALSE	FALSE	FALSE	FALSE	FALSE	FALSE	FALSE	FALSE	FALSE	FALSE
Gm11630	ENSMUSG00000086917.1	NA	chr11:97884593-97893811	lincRNA	0.155358	0.0235408	0.260316	0	0.41	Inf	NA	FALSE	FALSE	FALSE	FALSE	FALSE	FALSE	TRUE	TRUE	TRUE	FALSE	TRUE	TRUE
Gm11766	ENSMUSG00000086924.1	NA	chr11:119938510-119942074	lincRNA	0.160234	0.336886	0.357686	0.936831	0.93	0.4	0.00111772	TRUE	FALSE	FALSE	FALSE	FALSE	FALSE	FALSE	FALSE	TRUE	TRUE	FALSE	FALSE
4930583P06Rik	ENSMUSG00000086954.1	NA	chr2:124217678-124222331	lincRNA	0.00102633	0.124583	0	0.345845	NA	0.34	NA	FALSE	FALSE	FALSE	FALSE	FALSE	FALSE	FALSE	FALSE	FALSE	FALSE	FALSE	FALSE
4930566F21Rik	ENSMUSG00000086967.2	NA	chr5:31486628-31495179	processed_transcript	11.7804	0.0421671	13.1694	0.0919353	0	1.13	6.66805e-30	TRUE	FALSE	FALSE	FALSE	FALSE	FALSE	TRUE	TRUE	TRUE	TRUE	FALSE	FALSE
4933431E20Rik	ENSMUSG00000086968.3	NA	chr3:107888849-107896213	processed_transcript	0.327872	3.87939	0.905276	14.3415	-0.85	-0.36	NA	FALSE	FALSE	FALSE	FALSE	FALSE	FALSE	FALSE	TRUE	FALSE	FALSE	FALSE	FALSE
Rsf1os2	ENSMUSG00000086993.1	NA	chr7:97650009-97696828	processed_transcript	0.891725	0.562708	1.10993	1.15426	0.35	-0.07	0.000114742	TRUE	FALSE	FALSE	FALSE	FALSE	FALSE	TRUE	TRUE	FALSE	FALSE	FALSE	FALSE
2610027K06Rik	ENSMUSG00000087013.2	NA	chr11:85791660-85832223	processed_transcript	0.523442	0.790718	1.60246	1.46	-1.13	0.68	0.0439688	FALSE	FALSE	FALSE	FALSE	FALSE	FALSE	FALSE	TRUE	FALSE	FALSE	TRUE	FALSE
Gm16283	ENSMUSG00000087020.1	NA	chr18:49755793-49757189	processed_transcript	0.175878	0.163408	0.152304	0	0.44	Inf	0.969435	FALSE	FALSE	FALSE	FALSE	FALSE	FALSE	TRUE	TRUE	FALSE	FALSE	FALSE	FALSE
A230103J11Rik	ENSMUSG00000087026.2	NA	chr8:85053159-85060460	processed_transcript	8.57998	7.08482	12.426	7.22886	0.14	0.05	0.00813134	TRUE	FALSE	FALSE	FALSE	FALSE	FALSE	TRUE	FALSE	FALSE	FALSE	FALSE	FALSE
Gm16295	ENSMUSG00000087041.1	NA	chr9:118924872-118925777	lincRNA	0.0854714	1.72782	0.0828582	0.767192	-Inf	-0.57	NA	FALSE	FALSE	FALSE	FALSE	FALSE	FALSE	TRUE	TRUE	FALSE	FALSE	FALSE	FALSE
1700110K17Rik	ENSMUSG00000087047.3	NA	chr9:40323425-40343564	processed_transcript	0.182369	0.122479	0.195481	0.136179	0.69	0.62	0.399974	FALSE	FALSE	FALSE	FALSE	FALSE	FALSE	TRUE	FALSE	TRUE	TRUE	TRUE	FALSE
Eldr	ENSMUSG00000087060.2	NA	chr11:16935153-16951282	processed_transcript	0.352121	7.42589	0.734023	6.62701	0.26	0.01	9.31994e-31	TRUE	FALSE	FALSE	FALSE	FALSE	FALSE	TRUE	TRUE	TRUE	FALSE	FALSE	FALSE
Gm11532	ENSMUSG00000087067.1	NA	chr11:97020507-97026248	processed_transcript	0.608338	0.385734	0.682731	0.270535	-0.33	0.44	0.630944	FALSE	FALSE	FALSE	FALSE	FALSE	FALSE	FALSE	FALSE	TRUE	FALSE	TRUE	FALSE
4930474H06Rik	ENSMUSG00000087109.1	NA	chr12:71317620-71321660	processed_transcript	3.70538	4.03142	1.36126	7.99219	0.04	0.12	NA	FALSE	FALSE	FALSE	FALSE	TRUE	FALSE	FALSE	FALSE	FALSE	FALSE	FALSE	FALSE
Gm7237	ENSMUSG00000087112.1	NA	chr19:33409130-33420642	lincRNA	0.222764	0.0197004	0.240857	0.0525736	-1.2	-1.09	NA	FALSE	FALSE	FALSE	FALSE	FALSE	FALSE	FALSE	FALSE	FALSE	FALSE	FALSE	FALSE
Gm11714	ENSMUSG00000087113.1	NA	chr11:107428275-107435686	processed_transcript	0.150395	0.289881	0.620497	1.11765	0.44	0.23	0.256238	FALSE	FALSE	FALSE	FALSE	FALSE	FALSE	FALSE	FALSE	FALSE	FALSE	FALSE	FALSE
Gm12655	ENSMUSG00000087128.2	NA	chr4:94460930-94477180	processed_transcript	0.825478	0.170807	1.13952	0.411946	0.41	1.25	9.02854e-07	TRUE	FALSE	FALSE	FALSE	TRUE	FALSE	FALSE	FALSE	FALSE	FALSE	FALSE	FALSE
A930001C03Rik	ENSMUSG00000087132.2	NA	chr19:4439002-4448332	processed_transcript	0.206066	0.251895	0.293356	0.338596	0.27	0.76	0.528786	FALSE	FALSE	FALSE	FALSE	FALSE	FALSE	TRUE	FALSE	FALSE	FALSE	FALSE	FALSE
Gm16096	ENSMUSG00000087135.2	NA	chr9:40780741-40784181	processed_transcript	5.941	0.0709265	2.90043	2.54311	-0.08	0.42	8.43475e-17	TRUE	FALSE	FALSE	FALSE	FALSE	FALSE	FALSE	FALSE	TRUE	TRUE	TRUE	FALSE
Gm15545	ENSMUSG00000087138.1	NA	chr7:44986899-44994597	processed_transcript	2.56656	6.53098	1.41002	1.24418	0.12	0.25	0.000321265	TRUE	FALSE	FALSE	FALSE	FALSE	FALSE	TRUE	TRUE	FALSE	FALSE	TRUE	FALSE
Gm14022	ENSMUSG00000087151.1	NA	chr2:129060945-129065686	processed_transcript	0.108144	0.0605361	0.178774	0.217359	-0.51	-0.85	0.283942	FALSE	FALSE	FALSE	FALSE	FALSE	FALSE	TRUE	TRUE	FALSE	FALSE	FALSE	FALSE
Gm15246	ENSMUSG00000087159.2	NA	chrX:169320621-169368190	processed_transcript	1.55886	0.313858	1.09009	1.16402	0.3	0.06	4.12327e-05	TRUE	FALSE	FALSE	FALSE	FALSE	FALSE	TRUE	TRUE	FALSE	FALSE	TRUE	FALSE
2010001A14Rik	ENSMUSG00000087165.2	linc1600	chr11:57795498-57801417	processed_transcript	2.55872	8.78726	5.61009	3.13598	-0.34	-0.26	1.63933e-09	TRUE	FALSE	FALSE	FALSE	FALSE	FALSE	TRUE	TRUE	FALSE	TRUE	TRUE	FALSE
5530601H04Rik	ENSMUSG00000087174.2	linc1412	chrX:105037196-105079609	processed_transcript	8.74548	2.44849	5.91861	5.57401	-0.31	-0.26	2.34353e-10	TRUE	FALSE	FALSE	FALSE	FALSE	FALSE	TRUE	TRUE	FALSE	FALSE	FALSE	FALSE
E130307A14Rik	ENSMUSG00000087177.2	NA	chr10:39621411-39732007	processed_transcript	2.7279	13.5596	1.56894	15.0882	0.06	0.15	6.68531e-26	TRUE	FALSE	FALSE	FALSE	FALSE	FALSE	TRUE	TRUE	TRUE	FALSE	TRUE	TRUE
A230056P14Rik	ENSMUSG00000087178.2	NA	chr7:55962530-55980868	processed_transcript	0.25877	0.564514	0.122134	0.316145	0.71	-0.08	0.000702584	TRUE	FALSE	FALSE	FALSE	FALSE	FALSE	TRUE	TRUE	TRUE	FALSE	FALSE	FALSE
Gm14230	ENSMUSG00000087179.3	linc1619	chr2:156833048-156839892	lincRNA	7.01566	3.03741	10.246	7.69703	-0.48	0.15	0.000783873	TRUE	FALSE	FALSE	FALSE	FALSE	FALSE	TRUE	TRUE	FALSE	FALSE	TRUE	FALSE
Gm11650	ENSMUSG00000087184.1	NA	chr11:107793865-107795982	processed_transcript	0.0595084	1.82373	0.0358432	0.393562	-Inf	-0.73	1.4174e-10	TRUE	FALSE	FALSE	FALSE	FALSE	FALSE	TRUE	TRUE	FALSE	FALSE	FALSE	FALSE
2810408I11Rik	ENSMUSG00000087213.2	NA	chr1:64679870-64690659	processed_transcript	5.03278	3.74377	5.86447	4.65886	-0.48	-0.93	0.11203	FALSE	FALSE	FALSE	FALSE	FALSE	FALSE	TRUE	TRUE	FALSE	FALSE	TRUE	FALSE
BC037032	ENSMUSG00000087221.2	NA	chr15:4021685-4027405	processed_transcript	0.0834704	0.105859	0.139349	0.365573	-1.89	-1.48	0.287301	FALSE	FALSE	FALSE	FALSE	FALSE	FALSE	TRUE	TRUE	FALSE	TRUE	TRUE	FALSE
E230016M11Rik	ENSMUSG00000087231.2	NA	chr6:67036598-67080654	processed_transcript	5.11944	1.92775	5.23544	2.86841	-0.58	0.03	0.147999	FALSE	FALSE	FALSE	FALSE	FALSE	FALSE	TRUE	TRUE	TRUE	FALSE	TRUE	TRUE
Gm12043	ENSMUSG00000087253.1	NA	chr11:21370399-21374161	processed_transcript	0.136134	0.424672	0.289024	0.322977	-1.46	-1.6	0.426247	FALSE	FALSE	FALSE	FALSE	FALSE	FALSE	TRUE	TRUE	FALSE	FALSE	FALSE	FALSE
Gm15461	ENSMUSG00000087258.1	NA	chr5:30817976-30822612	lincRNA	0.0971468	0.176553	0.0889618	0.374411	1	0.37	NA	FALSE	FALSE	FALSE	FALSE	FALSE	FALSE	FALSE	FALSE	FALSE	FALSE	FALSE	FALSE
2610035D17Rik	ENSMUSG00000087259.2	NA	chr11:113043894-113201838	lincRNA	0.887371	8.21164	0.317479	2.91656	-0.3	0.11	2.02436e-11	TRUE	FALSE	FALSE	FALSE	TRUE	FALSE	TRUE	TRUE	FALSE	TRUE	TRUE	FALSE
D330023K18Rik	ENSMUSG00000087269.1	NA	chr2:31146456-31152291	processed_transcript	0.710525	2.36148	0.97327	1.76775	-0.28	-0.18	3.10007e-12	TRUE	FALSE	FALSE	FALSE	FALSE	FALSE	TRUE	TRUE	FALSE	FALSE	TRUE	FALSE
Gm13203	ENSMUSG00000087273.1	NA	chr4:148713702-148716581	lincRNA	0.733528	0.00430323	0.144205	0	-0.99	NA	3.7772e-07	TRUE	FALSE	FALSE	FALSE	FALSE	FALSE	FALSE	FALSE	FALSE	FALSE	FALSE	FALSE
Gm13061	ENSMUSG00000087288.1	NA	chr4:134018146-134019869	processed_transcript	0.165969	0.00359007	0.45697	0	-0.14	Inf	NA	FALSE	FALSE	FALSE	FALSE	FALSE	FALSE	TRUE	FALSE	TRUE	TRUE	FALSE	FALSE
Gm11946	ENSMUSG00000087291.1	NA	chr11:3530156-3536856	processed_transcript	0.37771	0.481092	0.673271	1.07773	-0.12	0.37	0.184565	FALSE	FALSE	FALSE	FALSE	FALSE	FALSE	FALSE	FALSE	FALSE	FALSE	FALSE	FALSE
Gm13556	ENSMUSG00000087294.1	NA	chr2:38286254-38287291	processed_transcript	0.204614	0.387385	0.180778	0.334768	1.07	1.27	0.579889	FALSE	FALSE	FALSE	FALSE	FALSE	FALSE	TRUE	TRUE	FALSE	FALSE	FALSE	FALSE
Gm11193	ENSMUSG00000087295.1	NA	chr11:78292847-78293956	processed_transcript	0.0659714	0.1456	0.193144	0.688993	-0.52	-0.43	NA	FALSE	FALSE	FALSE	FALSE	FALSE	FALSE	FALSE	FALSE	FALSE	FALSE	FALSE	FALSE
Gm16725	ENSMUSG00000087300.1	NA	chr8:18652800-18678056	processed_transcript	0.107003	0.0601321	0.197443	0.103091	0.49	0.56	0.0984398	FALSE	FALSE	FALSE	FALSE	FALSE	FALSE	FALSE	FALSE	FALSE	FALSE	FALSE	FALSE
A430035B10Rik	ENSMUSG00000087305.3	NA	chr6:8488794-8510430	processed_transcript	0.0263098	0.439412	0.0197233	0.195871	-2.57	-1.14	1.10166e-07	TRUE	FALSE	FALSE	TRUE	FALSE	FALSE	FALSE	TRUE	FALSE	FALSE	TRUE	TRUE
1810021B22Rik	ENSMUSG00000087331.3	NA	chr15:89071195-89075852	processed_transcript	0.0716152	1.1118	0.00805096	0.478212	3.62	-0.06	8.35171e-11	TRUE	FALSE	FALSE	FALSE	FALSE	FALSE	TRUE	TRUE	FALSE	FALSE	FALSE	FALSE
Gm12690	ENSMUSG00000087332.1	NA	chr4:99569499-99573011	lincRNA	0.121307	0.0019233	0.946046	0	-1.01	NA	NA	FALSE	FALSE	FALSE	FALSE	TRUE	FALSE	FALSE	FALSE	FALSE	FALSE	FALSE	FALSE
1700047K16Rik	ENSMUSG00000087347.1	NA	chr11:58322987-58324439	processed_transcript	0.265296	0.356184	0.388506	0.495626	0.45	0.09	0.386994	FALSE	FALSE	FALSE	FALSE	FALSE	FALSE	TRUE	TRUE	TRUE	FALSE	TRUE	FALSE
0610043K17Rik	ENSMUSG00000087361.2	NA	chr4:101353782-101399181	lincRNA	0.101228	0.0129385	0.13379	0.0833034	0.68	1.47	NA	FALSE	FALSE	FALSE	FALSE	FALSE	FALSE	FALSE	FALSE	FALSE	FALSE	FALSE	FALSE
C430049B03Rik	ENSMUSG00000087365.2	linc1410	chrX:53055045-53057190	processed_transcript	0.51113	1.6479	0.637553	5.06952	0.28	0	0.000201547	TRUE	FALSE	FALSE	FALSE	FALSE	FALSE	TRUE	TRUE	FALSE	FALSE	FALSE	FALSE
BC065397	ENSMUSG00000087368.2	NA	chrX:136741823-136803364	processed_transcript	2.96728	0.556042	2.74141	2.12015	-0.08	0.33	1.70339e-10	TRUE	FALSE	FALSE	FALSE	FALSE	FALSE	TRUE	TRUE	FALSE	FALSE	TRUE	FALSE
Gm15892	ENSMUSG00000087373.2	NA	chr11:88059065-88067476	lincRNA	0.300084	0.249512	1.14305	1.00701	1.02	0.14	0.108293	FALSE	FALSE	FALSE	FALSE	FALSE	FALSE	FALSE	TRUE	FALSE	FALSE	FALSE	FALSE
2210408F21Rik	ENSMUSG00000087380.2	NA	chr6:31220350-31337404	processed_transcript	0.238501	3.73077	0.287499	0.166663	-1.81	0.72	1.14653e-07	TRUE	FALSE	FALSE	FALSE	FALSE	FALSE	TRUE	FALSE	TRUE	FALSE	TRUE	FALSE
Gm12945	ENSMUSG00000087394.1	NA	chr4:126323598-126325237	processed_transcript	0.277154	0.146722	0.137254	0.169447	1.26	0.65	0.0459917	FALSE	FALSE	FALSE	FALSE	FALSE	FALSE	FALSE	FALSE	FALSE	FALSE	TRUE	FALSE
4933407K13Rik	ENSMUSG00000087396.2	NA	chrX:75706931-75764699	processed_transcript	1.90516	0.814759	1.83775	2.47426	0.57	0.88	0.00091769	TRUE	FALSE	FALSE	FALSE	FALSE	FALSE	TRUE	TRUE	FALSE	FALSE	TRUE	FALSE
Gm15270	ENSMUSG00000087400.3	linc1244	chr10:24549440-24597108	processed_transcript	0.510744	0.0470287	0.405313	0.17988	0.53	-0.33	4.53384e-10	TRUE	FALSE	FALSE	FALSE	FALSE	FALSE	TRUE	FALSE	FALSE	FALSE	FALSE	TRUE
Kantr	ENSMUSG00000087403.3	NA	chrX:152298499-152327495	lincRNA	2.40155	0.842889	2.98521	1.40501	-0.25	0.52	1.49901e-06	TRUE	FALSE	FALSE	FALSE	TRUE	FALSE	TRUE	TRUE	FALSE	FALSE	FALSE	FALSE
E130215H24Rik	ENSMUSG00000087406.1	NA	chr2:150667493-150668935	processed_transcript	0.450858	0.392902	0.130005	0.48149	-1.77	-0.38	0.160343	FALSE	FALSE	FALSE	FALSE	FALSE	FALSE	FALSE	FALSE	FALSE	TRUE	FALSE	FALSE
5730405O15Rik	ENSMUSG00000087424.1	NA	chrX:13042014-13045297	processed_transcript	1.41395	0.368919	1.23843	0.525621	-0.12	-0.07	4.78036e-06	TRUE	FALSE	FALSE	FALSE	FALSE	TRUE	TRUE	TRUE	TRUE	TRUE	TRUE	FALSE
Gm12100	ENSMUSG00000087474.1	NA	chr11:30750831-30756147	processed_transcript	0.396623	0.00433145	0.300777	0	0.26	NA	2.35637e-11	TRUE	FALSE	FALSE	FALSE	FALSE	FALSE	FALSE	FALSE	TRUE	TRUE	FALSE	FALSE
4930506C21Rik	ENSMUSG00000087478.1	NA	chr17:8293365-8311080	processed_transcript	0.277413	0.463652	0.206073	0.488761	1.02	-0.01	0.0255098	FALSE	FALSE	FALSE	FALSE	FALSE	FALSE	TRUE	TRUE	FALSE	FALSE	TRUE	FALSE
Gm16835	ENSMUSG00000087479.1	NA	chr14:119098964-119115074	processed_transcript	0.347488	0.201886	0.0134942	0.151218	2.25	-0.15	0.906379	FALSE	FALSE	FALSE	FALSE	FALSE	FALSE	TRUE	TRUE	FALSE	FALSE	FALSE	FALSE
2900089D17Rik	ENSMUSG00000087484.1	NA	chr5:144241689-144256186	processed_transcript	0.137368	0.374679	0.0928304	0.522554	-1.62	-0.83	0.308075	FALSE	FALSE	FALSE	FALSE	FALSE	FALSE	TRUE	TRUE	FALSE	FALSE	TRUE	FALSE
Gm16091	ENSMUSG00000087502.1	NA	chr8:72147600-72160855	processed_transcript	6.36176	1.74368	2.16672	4.64356	0.67	-0.09	6.86019e-26	TRUE	FALSE	FALSE	FALSE	FALSE	FALSE	TRUE	TRUE	TRUE	FALSE	TRUE	FALSE
Gm11459	ENSMUSG00000087503.1	NA	chr2:164960801-164962752	processed_transcript	0.0268728	0.116916	0.000161302	0.789899	8.69	-0.45	NA	FALSE	FALSE	FALSE	FALSE	FALSE	FALSE	FALSE	TRUE	FALSE	FALSE	FALSE	FALSE
Gm12319	ENSMUSG00000087523.1	NA	chr11:70654740-70656493	lincRNA	1.4796	0.71901	2.26037	0.851548	-0.33	0.47	0.0312108	FALSE	FALSE	FALSE	FALSE	FALSE	FALSE	TRUE	TRUE	TRUE	FALSE	FALSE	FALSE
9830144P21Rik	ENSMUSG00000087528.1	NA	chr2:129205957-129230579	processed_transcript	9.06247	0.746304	5.81615	2.41186	0.87	0.71	1.21866e-54	TRUE	FALSE	FALSE	FALSE	FALSE	FALSE	FALSE	FALSE	FALSE	FALSE	FALSE	FALSE
Zmiz1os1	ENSMUSG00000087535.1	NA	chr14:25455736-25461128	processed_transcript	0.00937046	0.418177	0.0216162	0.289724	-Inf	-0.34	1.13919e-13	TRUE	FALSE	FALSE	FALSE	FALSE	FALSE	TRUE	TRUE	TRUE	FALSE	TRUE	FALSE
Gm11412	ENSMUSG00000087540.1	NA	chr4:81743145-81746701	lincRNA	0.00233723	0.197772	0	0.198373	NA	-2.03	1.78109e-07	TRUE	FALSE	FALSE	FALSE	FALSE	FALSE	FALSE	FALSE	FALSE	FALSE	TRUE	TRUE
Gm16576	ENSMUSG00000087543.1	NA	chr15:79742697-79757394	lincRNA	0.119442	0.220071	0.161121	0.512085	0.78	0.46	0.00118614	TRUE	FALSE	FALSE	FALSE	FALSE	FALSE	TRUE	TRUE	FALSE	FALSE	TRUE	FALSE
2410019O14Rik	ENSMUSG00000087547.1	linc1328	chr2:157595582-157597320	lincRNA	3.94933	0.0225137	2.96035	0.0551914	-0.97	-Inf	1.45683e-18	TRUE	FALSE	FALSE	FALSE	TRUE	FALSE	TRUE	FALSE	TRUE	FALSE	FALSE	FALSE
Gm15764	ENSMUSG00000087556.1	NA	chr16:18416681-18421997	processed_transcript	0.154182	0.193056	0.268438	0.626915	0.47	0.66	0.672369	FALSE	FALSE	FALSE	FALSE	FALSE	FALSE	FALSE	FALSE	FALSE	FALSE	FALSE	FALSE
Gm15396	ENSMUSG00000087560.1	NA	chr7:44579967-44590624	processed_transcript	0.126119	0.137699	0.204055	0.201966	-0.07	0.35	NA	FALSE	FALSE	FALSE	FALSE	FALSE	FALSE	TRUE	TRUE	FALSE	FALSE	FALSE	FALSE
Gm11608	ENSMUSG00000087561.2	NA	chr1:63266847-63273120	lincRNA	0.135009	0	0.436317	0	0.89	NA	NA	FALSE	FALSE	FALSE	FALSE	FALSE	FALSE	TRUE	TRUE	FALSE	FALSE	FALSE	FALSE
Gm13647	ENSMUSG00000087570.1	NA	chr2:71737814-71745397	lincRNA	0.830434	0.0142145	0.738406	0.00915612	-0.15	1.53	1.29807e-06	TRUE	FALSE	FALSE	FALSE	FALSE	FALSE	FALSE	FALSE	TRUE	TRUE	FALSE	FALSE
C030037D09Rik	ENSMUSG00000087574.1	NA	chr11:88718644-88728893	lincRNA	0.152682	1.10516	0.587946	2.33483	0.39	0.01	1.57398e-15	TRUE	FALSE	FALSE	FALSE	FALSE	FALSE	TRUE	TRUE	FALSE	FALSE	TRUE	FALSE
1500017E21Rik	ENSMUSG00000087579.2	NA	chr19:36614051-36705641	processed_transcript	1.44731	2.43024	0.53626	7.4963	0.49	-0.07	6.66247e-08	TRUE	FALSE	FALSE	FALSE	FALSE	FALSE	FALSE	FALSE	TRUE	TRUE	TRUE	FALSE
D430040D24Rik	ENSMUSG00000087589.2	NA	chr1:36558358-36565613	processed_transcript	0.0325956	0.228791	0.0516793	0.177046	-1.07	0.02	0.0225172	FALSE	FALSE	FALSE	FALSE	FALSE	FALSE	TRUE	TRUE	TRUE	FALSE	TRUE	FALSE
2410004N09Rik	ENSMUSG00000087590.2	linc1614	chr18:33794891-33795986	lincRNA	43.0944	9.47453	31.0347	9.87821	0.06	-0.15	3.6001e-09	TRUE	FALSE	FALSE	TRUE	FALSE	FALSE	TRUE	TRUE	TRUE	FALSE	TRUE	FALSE
BC039771	ENSMUSG00000087594.1	NA	chr2:145675366-145753672	processed_transcript	0.225107	0.082208	0.175072	0.0273745	0.09	2.77	3.78729e-05	TRUE	FALSE	FALSE	FALSE	FALSE	FALSE	TRUE	FALSE	TRUE	FALSE	TRUE	FALSE
1810012K08Rik	ENSMUSG00000087595.1	NA	chr2:26138545-26139543	lincRNA	5.39267	11.2205	4.07638	4.69608	0.17	0.68	0.441679	FALSE	FALSE	FALSE	FALSE	FALSE	FALSE	FALSE	TRUE	FALSE	FALSE	TRUE	FALSE
5330434G04Rik	ENSMUSG00000087620.2	NA	chrX:105348281-105391776	lincRNA	0.00780836	0.322254	0.0108474	0.583591	1.09	-0.27	5.44117e-12	TRUE	TRUE	FALSE	FALSE	FALSE	FALSE	FALSE	TRUE	FALSE	FALSE	TRUE	FALSE
Gm12404	ENSMUSG00000087623.1	NA	chr4:41520693-41525823	processed_transcript	0.052547	0.417277	0.0803951	0.744385	0.18	0.52	0.000157288	TRUE	FALSE	FALSE	FALSE	FALSE	FALSE	FALSE	FALSE	FALSE	FALSE	FALSE	FALSE
9230111E07Rik	ENSMUSG00000087624.1	NA	chr2:167782052-167783486	lincRNA	0.309508	0.0399968	0.301681	0.147461	0.2	0.85	0.00128719	TRUE	FALSE	FALSE	FALSE	FALSE	FALSE	FALSE	FALSE	TRUE	FALSE	FALSE	FALSE
Gm14455	ENSMUSG00000087633.1	NA	chr2:172425803-172440560	processed_transcript	0.412668	0.162866	0.6226	0.0995854	-0.82	0.83	0.204204	FALSE	FALSE	FALSE	FALSE	FALSE	FALSE	TRUE	TRUE	FALSE	FALSE	TRUE	FALSE
E130018N17Rik	ENSMUSG00000087648.1	NA	chr2:168152602-168154513	lincRNA	1.63061	0.0569827	0.209696	0.0363322	0.3	-Inf	3.98498e-15	TRUE	FALSE	FALSE	FALSE	FALSE	FALSE	FALSE	FALSE	FALSE	TRUE	TRUE	FALSE
Gm15226	ENSMUSG00000087677.1	NA	chrX:166618101-166621542	lincRNA	0.311508	0	0.108961	0	-0.22	Inf	1.91443e-10	TRUE	FALSE	FALSE	FALSE	FALSE	FALSE	FALSE	FALSE	TRUE	FALSE	FALSE	FALSE
C330006A16Rik	ENSMUSG00000087679.2	NA	chr2:26136813-26140521	lincRNA	7.49773	19.0899	7.70265	8.57748	-0.35	-0.19	8.41176e-07	TRUE	FALSE	FALSE	FALSE	FALSE	FALSE	TRUE	TRUE	FALSE	FALSE	TRUE	FALSE
1700122E12Rik	ENSMUSG00000087685.1	NA	chr8:84847187-84848415	processed_transcript	0.532345	0.179702	0.259643	0.217424	-2.15	-0.81	0.0242765	FALSE	FALSE	FALSE	FALSE	FALSE	FALSE	TRUE	TRUE	TRUE	FALSE	TRUE	FALSE
Gm15283	ENSMUSG00000087700.1	NA	chr12:73926480-73949785	processed_transcript	3.96503	2.12426	2.52591	2.64406	-0.2	-0.3	2.63966e-07	TRUE	FALSE	FALSE	FALSE	FALSE	FALSE	TRUE	FALSE	FALSE	FALSE	FALSE	FALSE
Gm16568	ENSMUSG00000089702.1	NA	chr9:15330572-15335345	processed_transcript	14.3385	1.19994	9.17778	5.51245	0.04	0.08	0.000226063	TRUE	FALSE	FALSE	FALSE	FALSE	FALSE	FALSE	FALSE	FALSE	FALSE	FALSE	FALSE
Mir17hg	ENSMUSG00000089726.2	NA	chr14:115042878-115046727	lincRNA	28.437	0.445151	19.3377	2.4049	0.97	0.6	3.63702e-52	TRUE	TRUE	FALSE	FALSE	FALSE	FALSE	TRUE	TRUE	TRUE	FALSE	TRUE	FALSE
1700023H06Rik	ENSMUSG00000089827.1	NA	chr13:80884223-80885524	processed_transcript	1.03416	0.256892	0.627221	0.453622	0.95	0.75	4.21869e-05	TRUE	FALSE	FALSE	FALSE	FALSE	FALSE	TRUE	TRUE	TRUE	FALSE	TRUE	TRUE
Pitpnm2os2	ENSMUSG00000089842.1	NA	chr5:124194906-124200346	lincRNA	0.123417	0.154581	0.223652	0.848221	-0.18	-1.07	0.872213	FALSE	FALSE	FALSE	FALSE	FALSE	FALSE	FALSE	FALSE	FALSE	FALSE	FALSE	FALSE
Etohd2	ENSMUSG00000089875.1	NA	chr13:59769964-59773680	processed_transcript	0.276275	0.302402	0.540746	0.504061	-0.43	-0.14	0.376712	FALSE	FALSE	FALSE	FALSE	FALSE	FALSE	TRUE	TRUE	FALSE	FALSE	TRUE	FALSE
Gm13625	ENSMUSG00000089902.1	NA	chr2:69871411-69872202	processed_transcript	3.33997	1.22299	4.19856	2.38644	-0.48	-0.99	NA	FALSE	FALSE	FALSE	FALSE	FALSE	FALSE	FALSE	FALSE	FALSE	FALSE	FALSE	FALSE
Gm15954	ENSMUSG00000089979.1	NA	chr16:18069213-18070362	processed_transcript	0.530022	0.684912	0.614576	1.5253	0.7	0.08	0.839835	FALSE	FALSE	FALSE	FALSE	FALSE	FALSE	FALSE	FALSE	FALSE	FALSE	FALSE	FALSE
Gm15852	ENSMUSG00000089990.1	NA	chr1:169932697-169934248	processed_transcript	0.168498	0.868664	0.084846	0.307541	0.88	0.29	0.243768	FALSE	FALSE	FALSE	FALSE	FALSE	FALSE	FALSE	TRUE	FALSE	FALSE	TRUE	FALSE
1810020O05Rik	ENSMUSG00000089997.1	NA	chr6:87675592-87690847	lincRNA	0.158892	0.0545293	0.165507	0.0113784	0.25	-0.06	0.00634773	TRUE	FALSE	FALSE	FALSE	FALSE	FALSE	FALSE	FALSE	FALSE	FALSE	FALSE	FALSE
Gm16302	ENSMUSG00000090023.1	NA	chr9:14845612-14847835	lincRNA	0.146425	0.0537224	0.225801	0.281097	-1.17	0.23	0.058404	FALSE	FALSE	FALSE	FALSE	FALSE	FALSE	FALSE	FALSE	FALSE	FALSE	FALSE	FALSE
AI480526	ENSMUSG00000090086.2	NA	chr5:123133722-123141666	lincRNA	2.44907	1.20609	3.42033	5.23287	0.19	0.44	0.00239002	TRUE	FALSE	FALSE	FALSE	FALSE	FALSE	TRUE	TRUE	TRUE	FALSE	TRUE	FALSE
Gm16163	ENSMUSG00000090118.1	NA	chr8:124831697-124863703	processed_transcript	0.704967	0.47223	0.925357	0.619282	-0.29	-0.33	0.251106	FALSE	FALSE	FALSE	FALSE	FALSE	FALSE	FALSE	FALSE	FALSE	FALSE	FALSE	FALSE
Gm16534	ENSMUSG00000090157.2	NA	chr2:32050085-32064911	processed_transcript	0.675478	0.544451	1.20476	0.904147	1.2	1.55	0.0745292	FALSE	TRUE	FALSE	FALSE	FALSE	FALSE	FALSE	FALSE	FALSE	FALSE	FALSE	FALSE
4930480K15Rik	ENSMUSG00000090160.1	NA	chr17:90861168-90867102	processed_transcript	0.00217167	0.31437	0	0.819036	Inf	0.54	4.6721e-07	TRUE	FALSE	FALSE	FALSE	FALSE	FALSE	FALSE	FALSE	FALSE	FALSE	FALSE	FALSE
Gm16244	ENSMUSG00000090235.1	NA	chr19:42779031-42781454	processed_transcript	0.428004	0.0867107	0.207685	0.0573098	-0.49	1.61	1.72468e-06	TRUE	FALSE	FALSE	FALSE	FALSE	TRUE	TRUE	TRUE	FALSE	FALSE	FALSE	FALSE
Gm14027	ENSMUSG00000090248.1	NA	chr2:129016951-129021756	processed_transcript	0.234224	0.0713895	0.119039	0.273702	0.84	0.17	0.175415	FALSE	FALSE	FALSE	FALSE	FALSE	FALSE	FALSE	FALSE	FALSE	FALSE	FALSE	FALSE
D730045A05Rik	ENSMUSG00000090263.1	NA	chr18:74017906-74020088	lincRNA	0.103453	0.104529	0.137464	0.190919	1.46	0.82	0.939668	FALSE	FALSE	FALSE	FALSE	TRUE	FALSE	FALSE	FALSE	FALSE	FALSE	FALSE	FALSE
Gm17034	ENSMUSG00000090293.1	NA	chr6:82764281-82767288	processed_transcript	0.567845	0.0600354	0.299254	0.0934463	1.69	-0.07	1.41636e-08	TRUE	FALSE	FALSE	FALSE	FALSE	FALSE	FALSE	FALSE	TRUE	TRUE	FALSE	FALSE
Gm21989	ENSMUSG00000090370.3	NA	chr12:20990458-21200919	processed_transcript	0.622815	0.611096	0.544695	0.818142	0.1	0.43	0.198535	FALSE	FALSE	FALSE	FALSE	FALSE	FALSE	FALSE	FALSE	FALSE	FALSE	FALSE	FALSE
2810055G20Rik	ENSMUSG00000090386.4	NA	chr16:77236316-77691403	processed_transcript	0.0132029	3.27184	0.00173013	6.388	7.05	0.41	8.95247e-18	TRUE	TRUE	FALSE	FALSE	TRUE	FALSE	FALSE	TRUE	FALSE	FALSE	TRUE	TRUE
Nav1	ENSMUSG00000090399.1	NA	chr1:135606446-135688105	lincRNA	0.268947	1.68161	0.283148	1.40909	0.16	-0.23	6.57374e-06	TRUE	FALSE	FALSE	FALSE	FALSE	FALSE	TRUE	TRUE	TRUE	FALSE	TRUE	FALSE
Gm4675	ENSMUSG00000090534.1	NA	chr14:118236231-118261199	processed_transcript	0.29852	3.09321	0.129528	1.46075	-0.72	-0.48	8.13494e-09	TRUE	TRUE	FALSE	FALSE	FALSE	TRUE	TRUE	TRUE	FALSE	FALSE	TRUE	FALSE
A430057M04Rik	ENSMUSG00000090564.3	NA	chr14:21847577-21856926	processed_transcript	1.05724	0.7102	1.00408	0.459135	0.54	0.15	0.00285867	TRUE	FALSE	FALSE	FALSE	FALSE	FALSE	TRUE	TRUE	FALSE	FALSE	FALSE	FALSE
Gm17055	ENSMUSG00000090576.1	NA	chr6:108656916-108659417	lincRNA	0.346064	0.335828	0.353584	0.311069	0.08	0.15	0.92102	FALSE	FALSE	FALSE	FALSE	FALSE	FALSE	FALSE	FALSE	TRUE	FALSE	FALSE	FALSE
Gm17233	ENSMUSG00000090706.1	NA	chr14:73173819-73187321	processed_transcript	0.162761	0.301982	0.229459	0.966358	-0.14	-0.12	NA	FALSE	FALSE	FALSE	FALSE	TRUE	FALSE	FALSE	FALSE	FALSE	FALSE	FALSE	FALSE
Gm8378	ENSMUSG00000090722.2	NA	chr12:91674811-91686113	processed_transcript	0.428716	0.0878756	1.0695	0.0266379	0.34	2.76	1.3403e-10	TRUE	FALSE	FALSE	FALSE	FALSE	FALSE	FALSE	FALSE	TRUE	TRUE	TRUE	FALSE
Gm17705	ENSMUSG00000090936.2	NA	chr17:35165118-35167186	lincRNA	0.269602	0.357129	0.199433	0.352528	0.74	0.19	0.207765	FALSE	FALSE	FALSE	FALSE	FALSE	FALSE	TRUE	TRUE	TRUE	TRUE	FALSE	TRUE
Gm17251	ENSMUSG00000090952.2	NA	chr17:33759991-33761870	processed_transcript	2.22649	2.9553	3.22786	2.97651	0.13	-0.33	0.0311002	FALSE	FALSE	FALSE	FALSE	FALSE	FALSE	TRUE	TRUE	FALSE	FALSE	TRUE	FALSE
Gm17300	ENSMUSG00000091021.1	NA	chr4:132351771-132353382	lincRNA	17.5785	1.87041	18.4558	3.16771	0.61	0.58	8.22897e-27	TRUE	FALSE	FALSE	TRUE	FALSE	FALSE	TRUE	TRUE	FALSE	FALSE	FALSE	FALSE
Gm17108	ENSMUSG00000091133.1	NA	chr13:69610497-69614901	processed_transcript	1.31104	0.789646	2.31486	0.696505	-0.11	0.23	0.355459	FALSE	FALSE	FALSE	FALSE	FALSE	FALSE	FALSE	FALSE	FALSE	FALSE	FALSE	FALSE
Gm17337	ENSMUSG00000091430.1	NA	chr12:12787984-12794285	lincRNA	0.185712	0.00921501	0.226114	0	0.73	NA	0.030454	FALSE	FALSE	FALSE	FALSE	FALSE	FALSE	TRUE	FALSE	TRUE	TRUE	FALSE	FALSE
2810468N07Rik	ENSMUSG00000091475.2	NA	chr17:25570810-25575043	processed_transcript	0.784341	36.083	0.672548	8.60627	-0.64	-0.29	3.47077e-67	TRUE	FALSE	FALSE	FALSE	FALSE	FALSE	TRUE	TRUE	FALSE	FALSE	FALSE	FALSE
Gm17066	ENSMUSG00000091509.2	NA	chr14:105109389-105114676	processed_transcript	7.03598	1.3693	7.27285	9.08699	0.82	0.45	0.000109412	TRUE	FALSE	FALSE	FALSE	FALSE	TRUE	FALSE	FALSE	FALSE	FALSE	FALSE	FALSE
Gm9581	ENSMUSG00000091562.3	NA	chr16:59558012-59600886	processed_transcript	2.01358	1.77478	1.54012	4.37994	-0.68	-0.46	0.614275	FALSE	FALSE	FALSE	FALSE	FALSE	FALSE	TRUE	TRUE	FALSE	FALSE	FALSE	FALSE
Gm17188	ENSMUSG00000091849.2	NA	chr14:3186100-3262317	processed_transcript	0.574103	0.0601017	2.44231	1.4252	0.64	0.58	0.565224	FALSE	FALSE	FALSE	FALSE	FALSE	FALSE	FALSE	FALSE	FALSE	FALSE	FALSE	FALSE
Gm17354	ENSMUSG00000091985.1	NA	chr4:108633842-108637441	lincRNA	0.98416	0.747483	2.01119	1.3146	0.3	0.28	0.103756	FALSE	FALSE	FALSE	FALSE	FALSE	FALSE	FALSE	FALSE	FALSE	FALSE	FALSE	FALSE
E130317F20Rik	ENSMUSG00000091994.1	NA	chr10:79851380-79854956	processed_transcript	0.571374	2.23992	0.562687	1.23338	0.57	-0.28	6.08717e-13	TRUE	FALSE	FALSE	FALSE	FALSE	FALSE	TRUE	TRUE	FALSE	FALSE	TRUE	FALSE
Gm20460	ENSMUSG00000092176.1	NA	chr17:34614483-34627349	processed_transcript	0.0529598	0.395901	0.176434	0.150138	-0.94	1.66	5.92321e-07	TRUE	FALSE	FALSE	FALSE	FALSE	FALSE	TRUE	TRUE	FALSE	FALSE	TRUE	FALSE
Gm3912	ENSMUSG00000092178.1	NA	chr7:7366610-7374636	processed_transcript	0.908269	3.07514	0.292502	0.232594	-0.62	0.2	1.60796e-06	TRUE	FALSE	FALSE	FALSE	FALSE	FALSE	FALSE	FALSE	FALSE	FALSE	FALSE	FALSE
Gm20407	ENSMUSG00000092182.1	NA	chr19:27994196-27995693	processed_transcript	0.305117	0.151648	0.200365	0.30147	1.69	0.57	0.200634	FALSE	FALSE	FALSE	FALSE	FALSE	FALSE	FALSE	FALSE	FALSE	FALSE	FALSE	FALSE
Gm20416	ENSMUSG00000092185.1	NA	chr9:7965837-7977004	processed_transcript	0.355242	0.148382	0.600995	0.292223	0.89	0.51	NA	FALSE	FALSE	FALSE	FALSE	FALSE	FALSE	FALSE	FALSE	FALSE	FALSE	FALSE	FALSE
Gm20457	ENSMUSG00000092187.1	NA	chr7:64337549-64345964	processed_transcript	1.75727	4.61879	2.0573	4.68799	-0.19	-0.18	0.903919	FALSE	FALSE	FALSE	FALSE	FALSE	FALSE	FALSE	FALSE	FALSE	FALSE	FALSE	FALSE
Gm20470	ENSMUSG00000092190.1	NA	chr10:7743519-7761099	processed_transcript	0.542833	0.13559	0.780578	0.503551	0.57	0.6	NA	FALSE	FALSE	FALSE	FALSE	FALSE	FALSE	FALSE	FALSE	FALSE	FALSE	FALSE	FALSE
1110038B12Rik	ENSMUSG00000092203.2	linc1307	chr17:34950237-34952471	processed_transcript	59.8272	26.1341	57.0663	31.5287	0.36	0.51	2.97967e-07	TRUE	FALSE	FALSE	TRUE	FALSE	FALSE	TRUE	TRUE	TRUE	TRUE	TRUE	FALSE
Gm20529	ENSMUSG00000092218.1	NA	chr9:108051674-108058592	processed_transcript	0.27618	0.618781	0.380305	1.08334	0.73	0.8	NA	FALSE	FALSE	FALSE	FALSE	FALSE	FALSE	FALSE	FALSE	FALSE	FALSE	FALSE	FALSE
Gm20444	ENSMUSG00000092258.1	NA	chr9:44107300-44108960	processed_transcript	0.482776	11.4574	0.413099	1.92244	1.46	-0.17	NA	FALSE	FALSE	FALSE	FALSE	FALSE	FALSE	FALSE	FALSE	FALSE	FALSE	TRUE	FALSE
Gm20417	ENSMUSG00000092267.1	NA	chr19:5797561-5798549	processed_transcript	208.389	311.484	347.264	850.619	0.55	0.37	NA	FALSE	FALSE	FALSE	FALSE	FALSE	FALSE	TRUE	TRUE	FALSE	FALSE	FALSE	FALSE
Neat1	ENSMUSG00000092274.2	linc1317	chr19:5824707-5845478	lincRNA	30.2456	0.44489	49.6572	25.6802	0.51	0.59	1.76741e-46	TRUE	FALSE	FALSE	FALSE	FALSE	FALSE	TRUE	TRUE	FALSE	FALSE	TRUE	TRUE
Gm20412	ENSMUSG00000092283.1	NA	chr2:158117153-158117905	processed_transcript	2.49783	0.438019	1.42141	5.11026	0.56	0.16	NA	FALSE	FALSE	FALSE	FALSE	FALSE	FALSE	FALSE	FALSE	FALSE	FALSE	FALSE	FALSE
Malat1	ENSMUSG00000092341.2	NA	chr19:5795689-5802672	lincRNA	316.262	455.269	502.581	1336.63	0.67	0.41	0.351469	FALSE	FALSE	FALSE	FALSE	FALSE	FALSE	TRUE	TRUE	FALSE	FALSE	TRUE	TRUE
BC033916	ENSMUSG00000092349.1	NA	chr17:33905134-33906675	lincRNA	4.38653	0	6.25511	0	-1.44	NA	3.76772e-18	TRUE	FALSE	FALSE	FALSE	FALSE	FALSE	FALSE	FALSE	FALSE	FALSE	FALSE	FALSE
Gm20548	ENSMUSG00000092354.2	NA	chr5:101837415-101846410	processed_transcript	1.6891	0.818881	2.17814	1.76544	-0.24	0.01	7.07354e-12	TRUE	FALSE	FALSE	FALSE	TRUE	FALSE	FALSE	FALSE	FALSE	FALSE	FALSE	FALSE
Gm4189	ENSMUSG00000092384.2	NA	chr10:127289695-127290788	processed_transcript	0.141885	0.350342	0.27092	0.627478	0.41	0.24	0.000737022	TRUE	FALSE	FALSE	FALSE	FALSE	FALSE	TRUE	TRUE	FALSE	FALSE	TRUE	TRUE
Gm20536	ENSMUSG00000092386.1	NA	chr6:72609835-72616190	processed_transcript	27.5232	10.4029	11.2768	11.4435	0.15	-0.42	NA	FALSE	FALSE	FALSE	FALSE	FALSE	FALSE	FALSE	FALSE	FALSE	FALSE	FALSE	FALSE
Gm20402	ENSMUSG00000092405.1	NA	chr3:52268434-52269435	processed_transcript	1.07199	0.724712	1.42332	0.381488	-0.79	-0.51	NA	FALSE	FALSE	FALSE	FALSE	FALSE	FALSE	TRUE	TRUE	FALSE	FALSE	TRUE	FALSE
Gm20507	ENSMUSG00000092412.1	NA	chr17:33630758-33645705	processed_transcript	0.298871	0.260578	0.503221	0.979904	0.76	0.56	6.24252e-05	TRUE	FALSE	FALSE	FALSE	FALSE	FALSE	FALSE	TRUE	FALSE	FALSE	FALSE	FALSE
Gm20456	ENSMUSG00000092455.1	NA	chr11:22839298-22842604	processed_transcript	1.12515	0.0390299	3.14068	0.372728	0.58	0.59	1.01402e-05	TRUE	FALSE	FALSE	FALSE	FALSE	FALSE	FALSE	FALSE	FALSE	FALSE	FALSE	FALSE
Gm20531	ENSMUSG00000092482.1	NA	chr6:124732167-124738040	processed_transcript	0.400987	0.0935781	0.722276	0.156733	-1.55	1.19	0.509572	FALSE	FALSE	FALSE	FALSE	FALSE	FALSE	FALSE	FALSE	TRUE	TRUE	FALSE	FALSE
Gm20405	ENSMUSG00000092495.1	NA	chr15:65857868-65858356	processed_transcript	0.860103	0.124679	1.16495	0.64365	-0.22	1.25	NA	FALSE	FALSE	FALSE	FALSE	FALSE	FALSE	FALSE	FALSE	TRUE	FALSE	FALSE	FALSE
Gm20319	ENSMUSG00000092545.2	NA	chr16:26714445-26755502	processed_transcript	0.218854	2.25898	0.284	5.29735	-1.44	-1.05	NA	FALSE	FALSE	FALSE	FALSE	TRUE	FALSE	FALSE	FALSE	FALSE	FALSE	FALSE	FALSE
Gm20544	ENSMUSG00000092569.1	linc1316	chr18:75365331-75367088	processed_transcript	1.87552	0.124611	1.76009	0.310166	0.97	-0.98	1.73736e-16	TRUE	FALSE	FALSE	FALSE	FALSE	FALSE	TRUE	TRUE	FALSE	TRUE	FALSE	FALSE
Gm20492	ENSMUSG00000092593.1	NA	chr10:127288513-127289681	processed_transcript	0.0791712	0.64756	0.182277	0.328442	0.53	-0.35	0.00101239	TRUE	FALSE	FALSE	FALSE	FALSE	FALSE	TRUE	TRUE	FALSE	FALSE	FALSE	FALSE
Gm20427	ENSMUSG00000092595.1	NA	chr17:34026033-34031572	processed_transcript	0.490533	1.13579	0.63235	3.0114	0.5	-0.24	0.000467939	TRUE	FALSE	FALSE	FALSE	FALSE	FALSE	TRUE	TRUE	FALSE	FALSE	TRUE	FALSE
Gm20490	ENSMUSG00000092596.1	NA	chr2:173022502-173022956	processed_transcript	0.707267	0.55643	1.40394	1.22345	-0.35	0.03	NA	FALSE	FALSE	FALSE	FALSE	FALSE	FALSE	TRUE	TRUE	FALSE	FALSE	TRUE	FALSE
1700010K23Rik	ENSMUSG00000092599.1	NA	chr16:66657117-66664626	processed_transcript	0.0187349	1.95658	0	1.28062	Inf	-0.95	NA	FALSE	FALSE	FALSE	FALSE	FALSE	FALSE	FALSE	FALSE	FALSE	FALSE	FALSE	FALSE
Gm20508	ENSMUSG00000092604.1	NA	chr17:35991866-35993738	lincRNA	0.1178	0.036483	0.374124	0.111267	0.2	0.95	0.0643449	FALSE	FALSE	FALSE	FALSE	FALSE	FALSE	FALSE	FALSE	FALSE	FALSE	FALSE	FALSE
Gm20404	ENSMUSG00000092625.1	NA	chr6:116107650-116127493	processed_transcript	0.117081	0.128127	0.177613	0.362147	1.23	0.58	NA	FALSE	FALSE	FALSE	FALSE	FALSE	FALSE	FALSE	TRUE	FALSE	FALSE	TRUE	FALSE
9130230N09Rik	ENSMUSG00000092626.1	NA	chr11:22858930-22861264	processed_transcript	0.992037	0.0565282	1.17267	0.0148738	0.28	3.11	5.47345e-08	TRUE	FALSE	FALSE	FALSE	FALSE	FALSE	TRUE	TRUE	FALSE	FALSE	FALSE	FALSE
D130058E05Rik	ENSMUSG00000092627.2	NA	chr1:89930233-89933290	processed_transcript	1.21089	7.66434	1.80976	2.15635	-1.04	-0.73	4.00768e-14	TRUE	FALSE	FALSE	FALSE	FALSE	FALSE	TRUE	TRUE	TRUE	FALSE	FALSE	FALSE
Gm20732	ENSMUSG00000093387.1	NA	chr15:68340982-68363176	lincRNA	0.602523	0.225668	0.356453	0.275296	0.99	0.77	0.00438809	TRUE	TRUE	FALSE	FALSE	FALSE	FALSE	TRUE	TRUE	FALSE	FALSE	TRUE	FALSE
Gm20684	ENSMUSG00000093405.1	linc1631	chr7:65861005-65861992	processed_transcript	1.22075	0.234595	0.197333	0.0351727	0.14	-Inf	2.48302e-05	TRUE	FALSE	FALSE	FALSE	FALSE	FALSE	TRUE	TRUE	FALSE	FALSE	FALSE	FALSE
5730480H06Rik	ENSMUSG00000093459.1	NA	chr5:48395572-48414294	processed_transcript	0.69882	0.337643	1.48627	2.35419	0.61	0.38	0.026203	FALSE	FALSE	FALSE	FALSE	FALSE	FALSE	FALSE	FALSE	FALSE	FALSE	FALSE	FALSE
Six3os1	ENSMUSG00000093460.4	NA	chr17:85600650-85618398	processed_transcript	0.0284281	0.896629	0	11.2595	Inf	-0.04	NA	FALSE	FALSE	FALSE	FALSE	FALSE	FALSE	TRUE	TRUE	FALSE	FALSE	FALSE	FALSE
Gm20645	ENSMUSG00000093470.2	NA	chr11:23736846-23740357	lincRNA	0.982694	0.514648	1.04652	1.02831	0.27	-0.35	0.0928852	FALSE	FALSE	FALSE	FALSE	FALSE	FALSE	FALSE	FALSE	FALSE	FALSE	FALSE	FALSE
AA465934	ENSMUSG00000093483.1	NA	chr11:83291698-83294632	processed_transcript	7.47087	3.37228	40.4471	28.8659	-0.58	-0.16	0.00055419	TRUE	FALSE	FALSE	TRUE	FALSE	FALSE	TRUE	TRUE	FALSE	FALSE	TRUE	FALSE
Gm20627	ENSMUSG00000093507.1	NA	chr3:96254618-96256277	processed_transcript	0.142362	0.0349689	0.206676	0.0906906	0.12	0.99	0.058384	FALSE	FALSE	FALSE	FALSE	FALSE	FALSE	FALSE	FALSE	TRUE	FALSE	FALSE	FALSE
Gm20036	ENSMUSG00000093579.1	NA	chr12:101913239-101915335	processed_transcript	0.214883	0.436007	0.143127	0.225073	0.33	-0.82	0.0886637	FALSE	FALSE	FALSE	FALSE	FALSE	FALSE	TRUE	TRUE	FALSE	FALSE	TRUE	FALSE
Gm20554	ENSMUSG00000093587.2	NA	chr13:72626173-72627013	lincRNA	0.0187854	0.388526	0.0446349	0.413279	-0.07	0.53	9.49216e-06	TRUE	FALSE	FALSE	FALSE	FALSE	FALSE	FALSE	FALSE	TRUE	FALSE	FALSE	FALSE
Gm20707	ENSMUSG00000093594.1	NA	chr4:147782318-147809840	lincRNA	0.951881	0.0489377	1.09208	0.0281135	0.38	-1.03	1.45587e-24	TRUE	FALSE	FALSE	FALSE	FALSE	FALSE	TRUE	FALSE	TRUE	FALSE	FALSE	FALSE
A730085K08Rik	ENSMUSG00000093598.1	NA	chr9:122380574-122398801	processed_transcript	0.587991	2.47182	0.541309	2.26502	-0.46	-0.5	0.404338	FALSE	FALSE	FALSE	FALSE	FALSE	FALSE	FALSE	FALSE	FALSE	FALSE	FALSE	FALSE
B130034C11Rik	ENSMUSG00000093606.1	NA	chr16:87495998-87504033	processed_transcript	0.146943	0.291727	0.0793276	0.682133	0.43	-0.44	0.0231053	FALSE	FALSE	FALSE	FALSE	FALSE	FALSE	TRUE	TRUE	FALSE	FALSE	TRUE	FALSE
Gm20717	ENSMUSG00000093695.1	NA	chr15:64098316-64100886	processed_transcript	0.0773304	0.113433	0.1313	0.256651	1.71	0.83	NA	FALSE	FALSE	FALSE	FALSE	FALSE	FALSE	FALSE	FALSE	FALSE	FALSE	FALSE	FALSE
Gm20650	ENSMUSG00000093768.1	NA	chr7:126891621-126897236	processed_transcript	0.447696	0.796885	0.527511	0.482244	-0.28	0.7	NA	FALSE	FALSE	FALSE	FALSE	FALSE	FALSE	FALSE	FALSE	FALSE	FALSE	FALSE	FALSE
4931403E22Rik	ENSMUSG00000093772.1	NA	chr19:26768800-26823907	processed_transcript	0.0207529	0.160814	0.0136075	0.46176	2.11	0.26	NA	FALSE	FALSE	FALSE	FALSE	TRUE	FALSE	FALSE	FALSE	FALSE	FALSE	FALSE	FALSE
Gm4425	ENSMUSG00000093846.1	NA	chr12:22115755-22156646	lincRNA	1.77186	0.0607556	1.28216	0.3784	0.46	0.87	3.69635e-24	TRUE	FALSE	FALSE	FALSE	FALSE	FALSE	FALSE	FALSE	FALSE	FALSE	FALSE	FALSE
Slc6a16	ENSMUSG00000094152.2	NA	chr7:45241084-45272689	lincRNA	0.174483	0.00466931	0.19899	0.019494	-0.14	-Inf	2.0423e-06	TRUE	FALSE	TRUE	FALSE	FALSE	FALSE	FALSE	FALSE	FALSE	FALSE	FALSE	FALSE
Gm21982	ENSMUSG00000094365.1	NA	chr7:30641000-30664937	processed_transcript	0.780061	0.405564	0.635388	1.02001	0.66	0.17	0.0819135	FALSE	FALSE	FALSE	FALSE	FALSE	FALSE	TRUE	TRUE	TRUE	FALSE	FALSE	FALSE
Gm21781	ENSMUSG00000095123.1	NA	chr10:4391586-4396424	lincRNA	6.36884	1.01168	4.49486	3.80305	0.75	0.49	1.00959e-09	TRUE	FALSE	FALSE	FALSE	FALSE	FALSE	FALSE	FALSE	FALSE	FALSE	FALSE	FALSE
Gm21807	ENSMUSG00000095306.2	NA	chr8:68099491-68121527	lincRNA	0.0143933	0.420755	0.00340292	0.798562	4.09	-0.19	0.000259501	TRUE	FALSE	FALSE	FALSE	FALSE	FALSE	FALSE	FALSE	FALSE	FALSE	FALSE	FALSE
Gm21986	ENSMUSG00000096056.1	NA	chrX:101295838-101321348	processed_transcript	0.0937089	2.53431	0.253193	1.71189	-0.12	-0.06	0.0424765	FALSE	FALSE	FALSE	FALSE	FALSE	FALSE	FALSE	FALSE	FALSE	FALSE	FALSE	FALSE
Gm21971	ENSMUSG00000096751.3	NA	chr12:102673016-102727333	processed_transcript	0.683105	0.067767	0.968896	0.103099	0.21	1.27	1.67637e-27	TRUE	TRUE	FALSE	FALSE	TRUE	FALSE	FALSE	FALSE	TRUE	TRUE	FALSE	FALSE
2500002B13Rik	ENSMUSG00000096917.1	c(linc1576, linc1577)	chr8:57488053-57508877	lincRNA	7.34063	0.400014	4.54382	0.751486	0.17	0.55	1.63358e-52	TRUE	FALSE	FALSE	FALSE	FALSE	FALSE	TRUE	TRUE	TRUE	TRUE	TRUE	FALSE
Gm26824	ENSMUSG00000096924.1	NA	chr10:39864858-39866332	lincRNA	0.426474	0.846273	0.515372	1.72837	0.65	0.88	0.203161	FALSE	FALSE	FALSE	FALSE	FALSE	FALSE	FALSE	FALSE	FALSE	FALSE	FALSE	FALSE
Gm26823	ENSMUSG00000096926.1	NA	chr18:31859081-31861764	lincRNA	0.857976	0.213152	1.71678	0.808702	0.77	0.61	3.15614e-06	TRUE	FALSE	FALSE	FALSE	FALSE	FALSE	FALSE	FALSE	FALSE	FALSE	FALSE	FALSE
A330023F24Rik	ENSMUSG00000096929.2	NA	chr1:194976374-195037908	lincRNA	0.234791	0.289706	0.257467	0.559578	0.41	0.72	0.452449	FALSE	TRUE	FALSE	FALSE	FALSE	FALSE	TRUE	TRUE	TRUE	FALSE	TRUE	FALSE
5033403F01Rik	ENSMUSG00000096932.1	NA	chr13:38960618-38966299	lincRNA	0.0364155	0.243158	0.0568002	0.133677	0.96	-0.18	0.000137187	TRUE	FALSE	FALSE	FALSE	FALSE	FALSE	TRUE	TRUE	FALSE	FALSE	TRUE	FALSE
1700113A16Rik	ENSMUSG00000096935.1	NA	chr3:88171559-88177785	lincRNA	1.56077	3.65647	2.89955	2.61033	0	-0.22	0.511304	FALSE	FALSE	FALSE	FALSE	FALSE	FALSE	TRUE	TRUE	TRUE	TRUE	TRUE	FALSE
9530052E02Rik	ENSMUSG00000096938.2	NA	chr8:11007849-11054541	lincRNA	0.0806838	0.208629	0.0738768	0.281929	0.23	-0.71	NA	FALSE	FALSE	FALSE	FALSE	FALSE	FALSE	TRUE	TRUE	TRUE	FALSE	TRUE	FALSE
Gm26720	ENSMUSG00000096941.1	NA	chr1:91989050-91992628	lincRNA	0.247093	0.17949	0.691605	0.397802	0.4	0.8	NA	FALSE	FALSE	FALSE	FALSE	FALSE	FALSE	FALSE	FALSE	FALSE	FALSE	FALSE	FALSE
Gm26721	ENSMUSG00000096943.1	NA	chr8:83887078-83899501	lincRNA	0.794001	0.114385	0.0362167	0.162078	1.13	1.3	9.40177e-05	TRUE	FALSE	FALSE	FALSE	FALSE	FALSE	TRUE	TRUE	TRUE	FALSE	TRUE	FALSE
Gm26722	ENSMUSG00000096944.1	NA	chr4:129309080-129318443	lincRNA	25.5118	13.7247	15.5687	8.0035	-0.6	-0.56	0.000746523	TRUE	FALSE	FALSE	FALSE	FALSE	FALSE	FALSE	FALSE	TRUE	TRUE	FALSE	FALSE
Gm26546	ENSMUSG00000096945.1	NA	chr10:88379243-88383711	lincRNA	0.228104	0.0849635	0.537058	0.252071	0.59	0.57	4.05155e-05	TRUE	FALSE	FALSE	FALSE	TRUE	FALSE	FALSE	FALSE	FALSE	FALSE	FALSE	FALSE
Gm26723	ENSMUSG00000096947.1	NA	chr12:100208987-100209814	lincRNA	3.35694	33.7036	3.8959	19.5196	-0.2	-0.59	0.529129	FALSE	FALSE	FALSE	FALSE	FALSE	FALSE	FALSE	FALSE	FALSE	FALSE	FALSE	TRUE
Gm26572	ENSMUSG00000096952.1	NA	chr8:121091627-121094858	lincRNA	0.0790139	0.397271	0.150855	0.655413	0.88	0.66	1.97665e-07	TRUE	FALSE	FALSE	FALSE	FALSE	FALSE	FALSE	FALSE	FALSE	FALSE	TRUE	FALSE
Gdap10	ENSMUSG00000096954.1	NA	chr12:32821871-32826904	lincRNA	1.94202	0.0588186	2.23168	1.16811	0.28	0.32	1.43447e-24	TRUE	FALSE	FALSE	FALSE	FALSE	FALSE	TRUE	TRUE	FALSE	FALSE	TRUE	FALSE
Snhg18	ENSMUSG00000096956.1	linc1290	chr15:32240568-32244662	lincRNA	1.3844	0.0646758	0.717953	2.61297	0.08	0.16	1.41197e-19	TRUE	FALSE	FALSE	TRUE	FALSE	FALSE	TRUE	FALSE	FALSE	FALSE	FALSE	FALSE
E230013L22Rik	ENSMUSG00000096957.1	NA	chr8:11477928-11480241	lincRNA	0.127465	0.15183	0.121207	0.392792	-0.07	-0.63	0.674372	FALSE	FALSE	FALSE	FALSE	FALSE	FALSE	TRUE	FALSE	FALSE	FALSE	FALSE	FALSE
Gm26573	ENSMUSG00000096958.1	NA	chr4:146153455-147024959	lincRNA	0.43818	0.0491882	0.378878	0.0640313	0.38	0.69	0.00196236	TRUE	FALSE	FALSE	FALSE	FALSE	FALSE	FALSE	FALSE	FALSE	FALSE	FALSE	FALSE
3300005D01Rik	ENSMUSG00000096965.2	NA	chr17:5798656-5803240	lincRNA	0.218529	0.032744	0.240065	0.0318241	-0.42	-Inf	0.0394058	FALSE	FALSE	FALSE	FALSE	FALSE	FALSE	FALSE	FALSE	FALSE	FALSE	FALSE	FALSE
Gm26621	ENSMUSG00000096967.2	NA	chr15:68335135-68337410	processed_transcript	0.898678	0.128062	0.494418	0.32045	0.73	1.01	0.0028614	TRUE	FALSE	FALSE	FALSE	FALSE	FALSE	FALSE	FALSE	FALSE	FALSE	FALSE	FALSE
4930556M19Rik	ENSMUSG00000096971.1	NA	chr15:10717143-10722471	lincRNA	0.420944	0.0117529	0.359196	0.0400515	0.2	0.96	4.75433e-21	TRUE	FALSE	FALSE	FALSE	TRUE	FALSE	FALSE	FALSE	TRUE	TRUE	FALSE	FALSE
Gm26883	ENSMUSG00000096972.2	NA	chr2:169633645-169888503	lincRNA	0.0520962	2.54857	0.185045	6.14247	-0.47	-0.36	NA	FALSE	FALSE	FALSE	FALSE	FALSE	FALSE	FALSE	FALSE	TRUE	TRUE	FALSE	FALSE
Gm26881	ENSMUSG00000096974.1	NA	chr4:43046033-43053253	lincRNA	0.258939	1.12233	0.0363509	0.125014	2.64	0.49	8.20427e-06	TRUE	FALSE	FALSE	FALSE	FALSE	FALSE	TRUE	TRUE	TRUE	FALSE	TRUE	FALSE
Gm16386	ENSMUSG00000096975.1	NA	chr17:22784797-22817741	lincRNA	0.689144	0.334352	0.874293	2.0892	-0.03	0.44	0.136182	FALSE	FALSE	FALSE	FALSE	FALSE	FALSE	FALSE	TRUE	FALSE	FALSE	TRUE	FALSE
Gm26882	ENSMUSG00000096976.1	NA	chr9:90094177-90095902	lincRNA	1.26574	0.25652	1.32586	0.664124	1.07	0.5	0.00749552	TRUE	FALSE	FALSE	FALSE	FALSE	FALSE	FALSE	FALSE	FALSE	FALSE	FALSE	FALSE
Gm10827	ENSMUSG00000096977.1	NA	chr10:18235052-18238060	lincRNA	0.113152	0.0333848	0.149611	0.0461652	0.05	0.99	0.000322414	TRUE	FALSE	FALSE	FALSE	FALSE	FALSE	TRUE	TRUE	FALSE	FALSE	TRUE	FALSE
Gm16845	ENSMUSG00000096981.1	NA	chr9:22071031-22086122	lincRNA	0.257338	0.288704	0.295856	0.0274309	-0.52	2.62	0.543216	FALSE	FALSE	FALSE	FALSE	FALSE	FALSE	TRUE	TRUE	FALSE	FALSE	FALSE	FALSE
2010015M23Rik	ENSMUSG00000096983.1	NA	chr11:88039577-88047360	lincRNA	0.46086	0.310321	0.313079	0.179471	0.83	-0.86	0.0138726	FALSE	FALSE	FALSE	FALSE	FALSE	FALSE	TRUE	TRUE	TRUE	FALSE	TRUE	FALSE
4930509E16Rik	ENSMUSG00000096986.2	NA	chr9:72518249-72531858	lincRNA	0.407097	0.0957623	1.20729	0.0729768	-1.1	-1.15	0.00159335	TRUE	FALSE	FALSE	FALSE	FALSE	FALSE	TRUE	TRUE	TRUE	FALSE	TRUE	FALSE
A930029G22Rik	ENSMUSG00000096988.1	NA	chr17:69416659-69439304	lincRNA	0.0636024	0.175774	0.0454722	0.123914	1.24	-0.97	0.0107154	FALSE	FALSE	FALSE	FALSE	FALSE	FALSE	TRUE	TRUE	FALSE	FALSE	TRUE	FALSE
Gm26790	ENSMUSG00000096990.1	NA	chr7:35772377-35779168	lincRNA	4.05264	2.79775	5.13537	5.03023	0.03	0.13	0.457102	FALSE	FALSE	FALSE	FALSE	FALSE	FALSE	FALSE	FALSE	FALSE	FALSE	FALSE	FALSE
Gm26789	ENSMUSG00000096991.1	NA	chr10:63292285-63295793	lincRNA	0.643369	0.107701	1.24291	0.440655	0.71	0.99	3.3851e-13	TRUE	FALSE	FALSE	FALSE	FALSE	FALSE	FALSE	FALSE	FALSE	FALSE	FALSE	FALSE
Gm26788	ENSMUSG00000096992.3	NA	chr1:34165855-34178446	processed_transcript	0.761857	0.232355	1.82052	0.629195	0.92	0.3	3.59542e-08	TRUE	FALSE	FALSE	FALSE	FALSE	FALSE	FALSE	FALSE	TRUE	FALSE	FALSE	FALSE
2810029C07Rik	ENSMUSG00000096995.1	NA	chr12:111572320-111574402	lincRNA	0.596055	1.66499	0.463159	1.35854	-0.16	-0.03	2.47928e-05	TRUE	FALSE	FALSE	FALSE	FALSE	FALSE	TRUE	TRUE	FALSE	FALSE	TRUE	FALSE
Gm26792	ENSMUSG00000096996.1	NA	chr19:46335286-46338538	lincRNA	0.809022	0.666862	1.86207	2.2738	0.67	0.63	0.186887	FALSE	FALSE	FALSE	FALSE	FALSE	FALSE	FALSE	FALSE	FALSE	FALSE	FALSE	FALSE
Gm2670	ENSMUSG00000097002.1	NA	chr14:28508073-28511392	lincRNA	0.0185316	0.381167	0.0338897	0.251031	1.52	0.75	6.34724e-10	TRUE	FALSE	FALSE	FALSE	FALSE	FALSE	FALSE	TRUE	TRUE	TRUE	FALSE	FALSE
4930598A11Rik	ENSMUSG00000097005.1	NA	chr4:20032845-20041564	lincRNA	0.0110892	0.118328	0.00430019	0.107503	0.93	0.1	NA	FALSE	FALSE	FALSE	FALSE	FALSE	FALSE	FALSE	TRUE	FALSE	FALSE	FALSE	FALSE
9530082P21Rik	ENSMUSG00000097006.2	NA	chr17:23743233-23754065	lincRNA	4.36507	14.2893	3.39866	5.25577	-0.16	0.22	3.53556e-07	TRUE	FALSE	FALSE	FALSE	FALSE	FALSE	FALSE	FALSE	FALSE	FALSE	FALSE	FALSE
Gm26860	ENSMUSG00000097008.1	NA	chr10:42761595-42763635	lincRNA	0.610977	0.415901	1.17626	0.731747	-0.31	0.25	0.0369544	FALSE	FALSE	FALSE	FALSE	FALSE	FALSE	TRUE	TRUE	FALSE	FALSE	FALSE	FALSE
Gm4651	ENSMUSG00000097011.1	NA	chr6:121064463-121069954	lincRNA	0.103554	0.0982412	0.24815	0.271858	-0.16	0.35	0.827852	FALSE	FALSE	FALSE	FALSE	FALSE	FALSE	FALSE	FALSE	FALSE	FALSE	FALSE	FALSE
Gm26710	ENSMUSG00000097013.1	NA	chr10:80578646-80580677	lincRNA	0.259511	0.115619	0.292753	0.286077	-0.07	0.14	0.0157987	FALSE	FALSE	FALSE	FALSE	FALSE	FALSE	TRUE	TRUE	TRUE	FALSE	TRUE	FALSE
Gm26706	ENSMUSG00000097014.1	NA	chr1:133610410-133614422	lincRNA	0.395565	0.0644893	0.289705	0.0606125	0.62	0.31	6.25614e-05	TRUE	FALSE	FALSE	FALSE	FALSE	FALSE	TRUE	TRUE	FALSE	FALSE	TRUE	FALSE
Gm26707	ENSMUSG00000097017.1	NA	chr7:25816653-25820654	lincRNA	0.215531	0.00333376	0.224912	0.00889352	-0.22	-Inf	1.45619e-11	TRUE	FALSE	FALSE	FALSE	FALSE	FALSE	TRUE	FALSE	FALSE	FALSE	FALSE	FALSE
Gm26613	ENSMUSG00000097020.1	NA	chr11:115615461-115626707	lincRNA	1.08398	0.450794	1.1202	0.753207	0.5	0.49	0.374483	FALSE	FALSE	FALSE	FALSE	FALSE	FALSE	FALSE	FALSE	FALSE	FALSE	TRUE	FALSE
4933433G15Rik	ENSMUSG00000097021.2	NA	chr9:75410183-75417709	lincRNA	0.35479	0.121352	0.565536	0.110706	0.16	1.4	0.014087	FALSE	FALSE	FALSE	FALSE	FALSE	FALSE	TRUE	TRUE	TRUE	FALSE	TRUE	FALSE
AI854517	ENSMUSG00000097023.3	NA	chr7:79500025-79534403	lincRNA	0.866293	4.9157	0.123235	9.03303	1.03	0.25	3.61087e-10	TRUE	TRUE	FALSE	FALSE	FALSE	FALSE	TRUE	TRUE	TRUE	FALSE	TRUE	FALSE
Gm26559	ENSMUSG00000097027.1	NA	chr13:99516727-99521760	lincRNA	0.205023	0.0097153	0.207022	0.0758748	-0.93	-0.71	1.86796e-08	TRUE	FALSE	FALSE	FALSE	FALSE	FALSE	TRUE	FALSE	FALSE	TRUE	FALSE	FALSE
Gm26693	ENSMUSG00000097030.1	NA	chr17:32810143-32821697	lincRNA	0.116556	0.120939	0.194703	0.252388	0.67	-0.09	0.699679	FALSE	FALSE	FALSE	FALSE	FALSE	FALSE	TRUE	FALSE	TRUE	FALSE	FALSE	FALSE
Gm26819	ENSMUSG00000097033.1	NA	chr13:69809913-69816094	lincRNA	3.48567	3.14515	2.64107	2.33185	-0.23	0.21	1.13169e-06	TRUE	FALSE	FALSE	FALSE	FALSE	FALSE	FALSE	FALSE	FALSE	FALSE	FALSE	FALSE
Gm26692	ENSMUSG00000097035.1	NA	chr5:107659096-107688015	lincRNA	0.126479	0.043044	0.263833	0.0737485	-0.73	0.47	0.101541	FALSE	FALSE	FALSE	FALSE	FALSE	FALSE	FALSE	FALSE	FALSE	FALSE	FALSE	FALSE
Gm26821	ENSMUSG00000097038.1	NA	chr7:18962414-18965173	lincRNA	0.0729711	3.98203	0.438268	1.8595	0.07	-0.2	NA	FALSE	FALSE	FALSE	FALSE	FALSE	FALSE	FALSE	FALSE	FALSE	FALSE	FALSE	FALSE
Pvt1	ENSMUSG00000097039.3	linc1476	chr15:62037985-62378096	lincRNA	12.9104	5.97855	7.62162	12.5589	0.31	-0.09	0.0286207	FALSE	FALSE	FALSE	FALSE	FALSE	FALSE	TRUE	FALSE	TRUE	TRUE	FALSE	FALSE
2610316D01Rik	ENSMUSG00000097040.1	NA	chr3:45280439-45378260	lincRNA	0.0350565	1.9286	0.00114986	4.31162	0.35	0.17	6.58691e-17	TRUE	FALSE	FALSE	FALSE	FALSE	FALSE	FALSE	TRUE	FALSE	FALSE	TRUE	FALSE
Gm17491	ENSMUSG00000097042.1	NA	chr8:22480290-22483330	lincRNA	5.74419	0.537751	4.10577	2.8797	0.68	0.04	4.05434e-17	TRUE	FALSE	FALSE	FALSE	FALSE	FALSE	FALSE	FALSE	FALSE	FALSE	FALSE	FALSE
1110020A21Rik	ENSMUSG00000097047.1	NA	chr17:84954966-84957710	lincRNA	0.1811	0.199487	0.146163	0.301287	0.35	-1.46	0.329169	FALSE	FALSE	FALSE	FALSE	FALSE	FALSE	TRUE	TRUE	TRUE	TRUE	TRUE	FALSE
1600020E01Rik	ENSMUSG00000097048.2	linc1552	chr6:86526270-86564442	lincRNA	9.10947	4.42241	6.08388	6.61867	0.28	0.45	2.40441e-07	TRUE	FALSE	FALSE	FALSE	FALSE	FALSE	TRUE	TRUE	TRUE	FALSE	TRUE	FALSE
6530411M01Rik	ENSMUSG00000097049.1	NA	chr17:9147718-9167836	lincRNA	0.000724553	2.14605	0.0362956	0.557169	-Inf	0.13	1.256e-16	TRUE	FALSE	FALSE	FALSE	FALSE	FALSE	TRUE	TRUE	TRUE	TRUE	TRUE	TRUE
Gm9918	ENSMUSG00000097050.1	linc1482	chr15:102270562-102274121	lincRNA	0.134892	0.0199849	0.240118	0.0633493	-0.28	-1	7.36359e-05	TRUE	FALSE	FALSE	FALSE	FALSE	FALSE	TRUE	FALSE	TRUE	FALSE	FALSE	FALSE
Gm26836	ENSMUSG00000097051.1	NA	chr11:75745071-75761195	lincRNA	6.97995	5.52116	12.5461	6.07187	-0.08	-0.35	4.8553e-06	TRUE	FALSE	FALSE	FALSE	FALSE	FALSE	FALSE	FALSE	FALSE	FALSE	FALSE	FALSE
Snhg7	ENSMUSG00000097052.1	NA	chr2:26637176-26640244	lincRNA	18.771	2.71634	18.7106	6.32828	0.5	0.84	2.39016e-63	TRUE	FALSE	FALSE	TRUE	FALSE	FALSE	TRUE	TRUE	FALSE	FALSE	TRUE	FALSE
Gm4419	ENSMUSG00000097055.1	NA	chr12:21417910-21419803	lincRNA	0.499742	0.300375	1.018	0.426614	-0.46	-0.81	0.00398057	TRUE	FALSE	FALSE	FALSE	FALSE	FALSE	TRUE	TRUE	TRUE	FALSE	TRUE	FALSE
Gm4262	ENSMUSG00000097056.1	NA	chr16:11008897-11015186	lincRNA	0.243421	0.020661	0.234191	0.0883611	-0.44	-0.02	2.37338e-08	TRUE	FALSE	FALSE	FALSE	FALSE	FALSE	TRUE	FALSE	TRUE	FALSE	TRUE	FALSE
Gm17638	ENSMUSG00000097057.1	NA	chr15:77961673-77967126	lincRNA	1.70925	0.521067	3.49334	1.49096	0.05	0.57	1.86519e-26	TRUE	FALSE	FALSE	FALSE	FALSE	FALSE	FALSE	FALSE	FALSE	FALSE	FALSE	FALSE
Fam120aos	ENSMUSG00000097059.1	NA	chr13:48968286-48972031	lincRNA	1.25266	2.72782	0.6819	1.12714	0.12	-0.36	1.99616e-06	TRUE	FALSE	FALSE	FALSE	FALSE	FALSE	TRUE	TRUE	FALSE	FALSE	TRUE	FALSE
Gm17586	ENSMUSG00000097062.1	NA	chr11:120633767-120635125	lincRNA	3.55027	3.55186	5.12276	2.09424	0.11	-0.27	0.97497	FALSE	FALSE	FALSE	FALSE	FALSE	FALSE	TRUE	TRUE	TRUE	FALSE	TRUE	FALSE
Pou3f3os2	ENSMUSG00000097063.2	NA	chr1:42707060-42713454	processed_transcript	0.0138724	1.36542	0.0175915	2.37155	-1.65	0.66	4.74804e-08	TRUE	FALSE	FALSE	FALSE	FALSE	FALSE	FALSE	TRUE	TRUE	FALSE	TRUE	FALSE
Gm26758	ENSMUSG00000097066.1	NA	chr13:65780904-65867305	lincRNA	3.19687	0.0122666	1.64422	0.00160718	0.72	-Inf	NA	FALSE	FALSE	FALSE	FALSE	FALSE	FALSE	FALSE	FALSE	FALSE	FALSE	FALSE	FALSE
Foxl2os	ENSMUSG00000097072.2	NA	chr9:98949780-98955299	lincRNA	0.259791	0.497163	0.130509	0.0112166	-0.25	2.25	0.0741716	FALSE	FALSE	FALSE	FALSE	FALSE	FALSE	TRUE	TRUE	FALSE	FALSE	FALSE	FALSE
9430037G07Rik	ENSMUSG00000097073.2	NA	chr9:88595324-88599516	lincRNA	1.06561	1.04276	1.09233	1.84306	0.38	0.1	0.859815	FALSE	FALSE	FALSE	TRUE	FALSE	FALSE	FALSE	FALSE	FALSE	FALSE	FALSE	FALSE
D830044I16Rik	ENSMUSG00000097075.1	NA	chr7:126971719-126976098	lincRNA	0.241597	0.0253931	0.294335	0.096882	-0.14	0.47	9.14445e-05	TRUE	FALSE	FALSE	FALSE	FALSE	FALSE	TRUE	TRUE	FALSE	FALSE	TRUE	FALSE
C330046G13Rik	ENSMUSG00000097076.1	linc1251	chr10:84547416-84553338	lincRNA	3.2623	0.00457468	3.31947	0.00586211	-0.41	-Inf	2.7761e-20	TRUE	FALSE	FALSE	FALSE	FALSE	TRUE	FALSE	FALSE	TRUE	TRUE	FALSE	FALSE
Gm16712	ENSMUSG00000097077.1	NA	chr17:55954770-55959381	lincRNA	0.371506	0.100781	0.414847	0.168237	0.8	0.05	0.00101934	TRUE	FALSE	FALSE	FALSE	FALSE	FALSE	TRUE	TRUE	FALSE	FALSE	TRUE	FALSE
1700086O06Rik	ENSMUSG00000097080.2	NA	chr18:38238404-38250565	lincRNA	0.331556	1.45586	0.719763	1.48672	0.29	0.6	5.29791e-10	TRUE	FALSE	FALSE	FALSE	FALSE	FALSE	TRUE	TRUE	FALSE	FALSE	TRUE	FALSE
Gm10425	ENSMUSG00000097081.1	NA	chr12:111426873-111430946	lincRNA	0.0761673	0.155814	0.13808	0.357979	-0.65	0.68	0.963241	FALSE	FALSE	FALSE	FALSE	FALSE	FALSE	FALSE	FALSE	FALSE	TRUE	FALSE	FALSE
Gm26634	ENSMUSG00000097085.1	NA	chr15:78862955-78866889	lincRNA	0.110248	0.205363	0.0496271	0.0988763	-0.99	1.22	0.219222	FALSE	FALSE	FALSE	FALSE	FALSE	FALSE	FALSE	FALSE	FALSE	FALSE	TRUE	FALSE
Gm26615	ENSMUSG00000097088.1	NA	chr4:133085473-133089146	lincRNA	0.0390326	0.119517	0.374816	0.477187	0.18	0.37	0.0177268	FALSE	FALSE	FALSE	FALSE	FALSE	FALSE	TRUE	FALSE	FALSE	FALSE	FALSE	FALSE
Gm26724	ENSMUSG00000097090.1	NA	chr17:27201031-27203071	lincRNA	0.963715	1.28445	0.694452	2.17822	0.42	0.8	0.76539	FALSE	FALSE	FALSE	FALSE	FALSE	FALSE	FALSE	FALSE	FALSE	FALSE	FALSE	FALSE
C330013E15Rik	ENSMUSG00000097093.1	NA	chr15:100614139-100615110	lincRNA	0.229936	1.04592	0.373799	0.579929	-1.26	0.11	3.36569e-09	TRUE	FALSE	FALSE	FALSE	FALSE	FALSE	TRUE	TRUE	FALSE	FALSE	TRUE	TRUE
Gm9917	ENSMUSG00000097099.1	NA	chr9:107558809-107568415	lincRNA	2.80645	1.32044	1.31969	1.98434	0.27	0.15	0.000309854	TRUE	FALSE	FALSE	FALSE	FALSE	FALSE	TRUE	TRUE	FALSE	FALSE	TRUE	FALSE
Gm26579	ENSMUSG00000097104.1	NA	chr10:116674590-116679303	lincRNA	0.122136	0.00915606	0.573113	0	0.41	Inf	0.00977557	TRUE	FALSE	FALSE	FALSE	TRUE	FALSE	FALSE	FALSE	FALSE	FALSE	FALSE	FALSE
Gm6846	ENSMUSG00000097107.1	NA	chr10:21830498-21844851	lincRNA	1.38927	0.000941213	0.909748	0	0.03	Inf	6.26454e-16	TRUE	FALSE	FALSE	FALSE	FALSE	FALSE	FALSE	FALSE	TRUE	TRUE	FALSE	FALSE
Gm26581	ENSMUSG00000097108.1	NA	chr10:22212652-22217241	lincRNA	1.00137e-17	0.268982	0.0370908	0.802539	0.89	0.68	1.13015e-09	TRUE	FALSE	FALSE	FALSE	FALSE	FALSE	FALSE	FALSE	FALSE	FALSE	FALSE	FALSE
Gm26580	ENSMUSG00000097109.1	NA	chr1:21959841-21962530	lincRNA	0.0189775	0.150628	0.0278865	0.115994	1.29	0.62	0.0206453	FALSE	FALSE	FALSE	FALSE	FALSE	FALSE	FALSE	FALSE	FALSE	FALSE	TRUE	FALSE
Gm19705	ENSMUSG00000097113.2	linc1422	chr1:136670768-136690804	lincRNA	5.67061	0.404277	5.64678	0.901598	-0.36	-0.28	1.55686e-31	TRUE	FALSE	FALSE	FALSE	FALSE	FALSE	FALSE	FALSE	TRUE	TRUE	FALSE	FALSE
1810019N24Rik	ENSMUSG00000097115.2	NA	chr7:12948591-12961768	lincRNA	0.211321	0.0923812	0.212522	0.296056	-0.96	-1.07	0.355162	FALSE	FALSE	FALSE	FALSE	FALSE	FALSE	TRUE	FALSE	TRUE	FALSE	FALSE	FALSE
Gm17514	ENSMUSG00000097118.1	NA	chr13:66183078-66203636	lincRNA	3.58076	0.00568389	0.694498	0.00168866	0.45	-0.06	4.17823e-16	TRUE	FALSE	FALSE	FALSE	FALSE	FALSE	FALSE	FALSE	FALSE	FALSE	FALSE	FALSE
B230354K17Rik	ENSMUSG00000097119.1	NA	chr17:45433851-45442544	lincRNA	4.31925	2.2524	6.48021	4.50458	0.51	-0.18	0.0846394	FALSE	FALSE	FALSE	FALSE	FALSE	FALSE	TRUE	TRUE	FALSE	FALSE	TRUE	FALSE
D130020L05Rik	ENSMUSG00000097121.1	NA	chr12:101082480-101088927	lincRNA	2.71011	0.938296	3.27397	1.38546	-0.38	-0.81	0.0742478	FALSE	FALSE	FALSE	FALSE	FALSE	FALSE	TRUE	TRUE	FALSE	FALSE	TRUE	FALSE
Gm26624	ENSMUSG00000097122.1	NA	chr4:147136277-147457019	lincRNA	0.493589	0.0253621	0.256584	0.16626	1.33	0.12	5.80118e-06	TRUE	FALSE	FALSE	FALSE	TRUE	FALSE	FALSE	FALSE	FALSE	FALSE	FALSE	FALSE
Gm6297	ENSMUSG00000097123.1	NA	chr4:40720153-40722398	lincRNA	0.323809	0.133273	0.367419	0.443857	0	-0.13	0.0114703	FALSE	FALSE	FALSE	FALSE	FALSE	FALSE	TRUE	TRUE	FALSE	FALSE	TRUE	TRUE
Gm26885	ENSMUSG00000097125.1	NA	chr17:29461895-29491925	lincRNA	0.222936	0.00610933	0.190474	0.0046241	0.22	0.94	3.68879e-17	TRUE	FALSE	FALSE	FALSE	FALSE	FALSE	TRUE	FALSE	TRUE	TRUE	TRUE	FALSE
D230017M19Rik	ENSMUSG00000097131.1	NA	chr1:72236464-72274869	lincRNA	0.407049	0.0482274	0.926911	0.167227	0.54	0.46	7.54437e-13	TRUE	FALSE	TRUE	FALSE	FALSE	FALSE	TRUE	TRUE	TRUE	TRUE	TRUE	TRUE
Gm26628	ENSMUSG00000097133.1	NA	chr6:71961144-71963775	lincRNA	1.95625	0.744482	2.97839	1.33427	0.78	0.75	0.00108278	TRUE	FALSE	FALSE	FALSE	FALSE	FALSE	FALSE	FALSE	FALSE	FALSE	FALSE	FALSE
1110002J07Rik	ENSMUSG00000097134.1	linc1246	chr10:66912488-66920258	lincRNA	0.705179	0.506313	1.12246	0.278788	0.43	-0.02	0.327886	FALSE	FALSE	FALSE	FALSE	FALSE	FALSE	TRUE	TRUE	TRUE	TRUE	TRUE	TRUE
Gm26772	ENSMUSG00000097136.1	NA	chr14:25548389-25554369	lincRNA	0.0497406	0.4824	0.0549253	1.46507	1.08	0.29	4.00883e-16	TRUE	FALSE	FALSE	FALSE	FALSE	FALSE	FALSE	FALSE	FALSE	FALSE	FALSE	FALSE
Gm26625	ENSMUSG00000097138.1	NA	chr6:47546665-47551704	lincRNA	0.50449	0.134064	0.491082	0.682046	0.73	0.23	9.2688e-05	TRUE	FALSE	FALSE	FALSE	FALSE	FALSE	FALSE	FALSE	FALSE	FALSE	FALSE	FALSE
Gm26779	ENSMUSG00000097140.1	NA	chr5:109886230-109891137	lincRNA	2.16312	0.543266	1.58421	2.36924	0.64	0.57	1.48171e-06	TRUE	FALSE	FALSE	FALSE	FALSE	FALSE	FALSE	FALSE	FALSE	FALSE	FALSE	FALSE
Gm10524	ENSMUSG00000097141.1	NA	chr18:82692948-82706174	lincRNA	0.126028	1.62987	0.0762294	0.463406	-2.03	0.01	1.50485e-35	TRUE	FALSE	FALSE	FALSE	FALSE	FALSE	TRUE	TRUE	FALSE	FALSE	FALSE	FALSE
Gm26778	ENSMUSG00000097142.1	NA	chr14:102978219-102982528	lincRNA	0.949864	6.7689	0.911002	23.618	0.11	-0.23	NA	FALSE	FALSE	FALSE	FALSE	FALSE	FALSE	FALSE	FALSE	FALSE	FALSE	FALSE	FALSE
Gm17608	ENSMUSG00000097143.1	NA	chr3:97284907-97297778	lincRNA	0.0623263	0.107149	0.100054	0.323886	-0.39	0.79	0.514793	FALSE	FALSE	FALSE	FALSE	FALSE	FALSE	FALSE	TRUE	FALSE	FALSE	TRUE	FALSE
9230114K14Rik	ENSMUSG00000097145.1	linc1535	chr5:52190680-52197984	lincRNA	1.15322	1.03192	0.982118	1.52441	0	-0.18	0.630106	FALSE	FALSE	FALSE	FALSE	FALSE	FALSE	TRUE	TRUE	FALSE	FALSE	TRUE	FALSE
Gm26780	ENSMUSG00000097147.1	NA	chr11:76614466-76622204	lincRNA	0.368935	0.051132	0.668659	0.0986998	0.98	0.37	6.97087e-10	TRUE	FALSE	FALSE	FALSE	FALSE	FALSE	FALSE	FALSE	TRUE	FALSE	FALSE	FALSE
Gm26515	ENSMUSG00000097152.1	NA	chr5:110779881-110781127	lincRNA	0.958776	0.911952	2.10637	0.947291	-0.22	-0.1	0.0692343	FALSE	FALSE	FALSE	FALSE	FALSE	FALSE	TRUE	TRUE	TRUE	FALSE	TRUE	FALSE
Gm26510	ENSMUSG00000097154.2	NA	chr17:70874348-70924996	lincRNA	1.20248	0.0425667	1.13489	0.0634729	0.73	1.32	1.0548e-16	TRUE	FALSE	FALSE	FALSE	FALSE	FALSE	FALSE	FALSE	FALSE	FALSE	FALSE	FALSE
Gm3764	ENSMUSG00000097156.2	NA	chr3:88206812-88229959	lincRNA	0.117436	170.452	0.329913	200.594	-0.67	0.32	1.08242e-162	TRUE	TRUE	FALSE	FALSE	FALSE	FALSE	TRUE	TRUE	FALSE	FALSE	TRUE	TRUE
Gm26516	ENSMUSG00000097158.1	NA	chr4:130774816-130779246	lincRNA	2.15089	0.551896	2.83998	1.47325	0.87	0.4	8.40477e-13	TRUE	FALSE	FALSE	TRUE	TRUE	FALSE	FALSE	FALSE	FALSE	FALSE	FALSE	FALSE
Gm26517	ENSMUSG00000097159.1	NA	chr12:51888014-51889459	lincRNA	0.545243	0.379576	0.985984	1.0811	-0.56	-0.3	0.0590908	FALSE	FALSE	FALSE	FALSE	FALSE	FALSE	FALSE	FALSE	FALSE	FALSE	FALSE	FALSE
A630072L19Rik	ENSMUSG00000097160.1	NA	chr12:100941741-100949875	lincRNA	0.950178	0.776465	2.51187	1.39562	0.25	-0.23	0.127669	FALSE	FALSE	FALSE	FALSE	FALSE	FALSE	FALSE	FALSE	FALSE	FALSE	FALSE	FALSE
2310010J17Rik	ENSMUSG00000097162.1	NA	chr7:90124857-90129474	lincRNA	0.393212	0.279627	0.416294	0.385814	-0.18	-0.78	0.731431	FALSE	FALSE	FALSE	FALSE	FALSE	FALSE	TRUE	TRUE	FALSE	FALSE	TRUE	FALSE
Cep83os	ENSMUSG00000097164.1	NA	chr10:94673492-94688613	lincRNA	1.27423	2.08911	0.382704	1.0844	-0.45	0.19	0.116772	FALSE	FALSE	FALSE	FALSE	FALSE	FALSE	TRUE	TRUE	FALSE	FALSE	TRUE	FALSE
2210008F06Rik	ENSMUSG00000097165.1	NA	chr11:77489853-77491409	lincRNA	0.0299094	0.504311	0	0.553812	Inf	-0.6	1.0447e-06	TRUE	FALSE	FALSE	FALSE	FALSE	FALSE	FALSE	TRUE	FALSE	FALSE	TRUE	FALSE
9330179D12Rik	ENSMUSG00000097166.1	NA	chr6:127149388-127212411	lincRNA	0.0292397	0.974032	0.0690102	0.600391	-0.79	-1.05	5.65997e-06	TRUE	FALSE	FALSE	FALSE	FALSE	FALSE	TRUE	TRUE	FALSE	FALSE	TRUE	FALSE
Gm16740	ENSMUSG00000097167.1	NA	chr3:95217456-95226658	lincRNA	1.23189	2.07818	1.50914	1.25724	-0.36	-0.18	5.31402e-05	TRUE	FALSE	FALSE	FALSE	FALSE	FALSE	TRUE	TRUE	TRUE	FALSE	TRUE	FALSE
Gm16982	ENSMUSG00000097170.1	NA	chr7:141610065-141613747	lincRNA	0.445799	0.211844	0.997922	0.782559	0.3	0.45	0.000874105	TRUE	FALSE	FALSE	FALSE	FALSE	FALSE	FALSE	FALSE	FALSE	FALSE	FALSE	FALSE
Gm17644	ENSMUSG00000097171.1	NA	chr1:12667562-12673090	lincRNA	1.52981	0.140941	0.656133	0.195274	1.08	1.27	5.52071e-19	TRUE	FALSE	FALSE	FALSE	FALSE	TRUE	FALSE	FALSE	FALSE	FALSE	FALSE	FALSE
4930444M15Rik	ENSMUSG00000097172.1	linc1288	chr14:76514557-76520855	lincRNA	4.27665	0.00554327	2.04968	0.00551213	-0.5	1.53	5.73871e-28	TRUE	FALSE	FALSE	FALSE	FALSE	FALSE	FALSE	FALSE	FALSE	FALSE	FALSE	FALSE
Gm26829	ENSMUSG00000097173.1	linc1258	chr11:22600334-22610879	lincRNA	0.154243	0.00798256	3.65525	0.0371685	-0.43	1	0.00187792	TRUE	FALSE	FALSE	FALSE	FALSE	FALSE	FALSE	FALSE	TRUE	FALSE	FALSE	FALSE
Gm4890	ENSMUSG00000097174.1	NA	chr8:79295122-79307685	lincRNA	0.213712	0.622494	0.286594	0.362409	0.28	0.42	2.77518e-05	TRUE	FALSE	FALSE	FALSE	FALSE	FALSE	TRUE	TRUE	FALSE	FALSE	TRUE	FALSE
9330159M07Rik	ENSMUSG00000097177.2	NA	chr9:88840235-88858870	lincRNA	0.781277	0.823483	1.63074	1.07874	-0.41	0.22	0.995452	FALSE	FALSE	FALSE	TRUE	FALSE	FALSE	FALSE	FALSE	FALSE	FALSE	FALSE	FALSE
2700038G22Rik	ENSMUSG00000097180.1	linc1533	chr5:23850596-23854924	lincRNA	4.13973	0.723116	3.21127	0.872541	0.17	-0.33	1.90134e-17	TRUE	FALSE	FALSE	TRUE	FALSE	FALSE	TRUE	TRUE	FALSE	FALSE	TRUE	FALSE
Gm17501	ENSMUSG00000097183.1	NA	chr3:145650311-145652093	lincRNA	1.12013	0.0746886	0.547096	0.461521	0.73	0.67	3.14311e-16	TRUE	FALSE	FALSE	FALSE	FALSE	FALSE	TRUE	TRUE	TRUE	TRUE	TRUE	FALSE
Snhg1	ENSMUSG00000097188.1	NA	chr19:8723495-8726442	lincRNA	43.8476	3.32071	34.0247	12.8794	0.8	0.35	2.70204e-34	TRUE	FALSE	FALSE	TRUE	FALSE	FALSE	TRUE	TRUE	TRUE	FALSE	TRUE	FALSE
Gm26594	ENSMUSG00000097189.1	NA	chr3:95855965-95861485	lincRNA	0.386628	0.926559	0.18574	0.201595	0.33	0.81	6.56427e-06	TRUE	FALSE	FALSE	FALSE	FALSE	FALSE	TRUE	TRUE	FALSE	FALSE	FALSE	FALSE
Gm26664	ENSMUSG00000097193.1	NA	chr8:84665127-84669406	lincRNA	1.64464	0.537008	1.59089	1.12108	0.59	-0.1	2.88296e-05	TRUE	FALSE	FALSE	FALSE	FALSE	FALSE	TRUE	TRUE	TRUE	FALSE	TRUE	FALSE
Snhg5	ENSMUSG00000097195.3	NA	chr9:88521049-88522929	processed_transcript	104.366	14.0798	75.5832	48.9212	0.4	0.45	1.59665e-27	TRUE	FALSE	FALSE	TRUE	FALSE	FALSE	TRUE	TRUE	FALSE	FALSE	TRUE	FALSE
9530027J09Rik	ENSMUSG00000097197.1	NA	chrX:48276791-48285426	lincRNA	5.79673	0.94588	7.30042	1.38229	0.28	-0.31	3.48241e-21	TRUE	FALSE	FALSE	FALSE	FALSE	FALSE	TRUE	TRUE	FALSE	FALSE	TRUE	FALSE
Gm17690	ENSMUSG00000097204.1	NA	chr3:96167463-96172414	lincRNA	0.474155	1.85458	0.378647	1.74318	0.05	0.08	1.6898e-09	TRUE	FALSE	FALSE	FALSE	FALSE	FALSE	TRUE	TRUE	TRUE	FALSE	TRUE	FALSE
Gm26699	ENSMUSG00000097206.1	NA	chr6:38551530-38554007	lincRNA	2.12385	0.957708	3.97492	2.70755	0.18	-0.18	NA	FALSE	FALSE	FALSE	FALSE	FALSE	FALSE	FALSE	FALSE	FALSE	FALSE	TRUE	FALSE
6030443J06Rik	ENSMUSG00000097207.2	NA	chr5:22550436-22807850	lincRNA	9.15534	8.45462	8.2621	1.96551	-0.53	-0.25	0.729706	FALSE	FALSE	TRUE	FALSE	FALSE	FALSE	TRUE	TRUE	FALSE	FALSE	TRUE	FALSE
AU022754	ENSMUSG00000097209.1	NA	chr15:85581141-85593708	lincRNA	0.0886564	0.396598	0.0823384	0.326043	-0.46	0.45	1.88203e-06	TRUE	FALSE	FALSE	FALSE	FALSE	FALSE	TRUE	TRUE	FALSE	FALSE	FALSE	FALSE
Fam160a2	ENSMUSG00000097210.1	NA	chr7:105371210-105373718	lincRNA	0.405603	0.458499	1.069	1.46902	0.75	0.23	NA	FALSE	FALSE	FALSE	FALSE	FALSE	FALSE	FALSE	FALSE	FALSE	FALSE	FALSE	FALSE
4932441J04Rik	ENSMUSG00000097216.1	NA	chr5:57570081-57717919	lincRNA	0.0141681	0.118514	0.0520091	0.19638	-6.16	-2.07	NA	FALSE	FALSE	FALSE	FALSE	FALSE	FALSE	FALSE	TRUE	FALSE	FALSE	FALSE	FALSE
Gm26549	ENSMUSG00000097217.1	NA	chr17:32284786-32298689	lincRNA	0.537659	0.602705	0.535857	0.965828	0.49	0	0.656223	FALSE	FALSE	FALSE	FALSE	FALSE	FALSE	TRUE	TRUE	FALSE	FALSE	TRUE	FALSE
Gm2449	ENSMUSG00000097223.1	NA	chr9:119892702-119894863	lincRNA	0.126236	0.186494	0.0694	0.128148	1.53	0.76	0.439508	FALSE	FALSE	FALSE	FALSE	FALSE	FALSE	TRUE	TRUE	FALSE	FALSE	TRUE	FALSE
A330076H08Rik	ENSMUSG00000097225.2	NA	chr7:61930912-61982356	lincRNA	0.0181562	2.49316	0.0938208	7.575	0.59	0.28	NA	FALSE	TRUE	FALSE	FALSE	FALSE	FALSE	FALSE	TRUE	FALSE	FALSE	FALSE	FALSE
F630040L22Rik	ENSMUSG00000097227.1	NA	chr9:108104964-108118343	lincRNA	0.0305108	0.315695	0.0448384	0.134928	0.79	0.1	0.550252	FALSE	FALSE	FALSE	FALSE	FALSE	FALSE	FALSE	FALSE	FALSE	FALSE	FALSE	FALSE
Gm26598	ENSMUSG00000097229.1	NA	chr1:136622097-136624650	lincRNA	0.771528	0.0181781	1.30705	0	1.06	NA	1.40084e-14	TRUE	FALSE	FALSE	FALSE	FALSE	FALSE	TRUE	TRUE	FALSE	FALSE	TRUE	FALSE
Gm26853	ENSMUSG00000097230.1	NA	chr8:19789797-19798548	lincRNA	8.86189	2.92297	9.11646	5.99136	0.86	0.49	0.00699092	TRUE	FALSE	FALSE	FALSE	FALSE	FALSE	FALSE	FALSE	FALSE	FALSE	FALSE	FALSE
Gm26852	ENSMUSG00000097231.1	NA	chr7:19382219-19392718	lincRNA	0.596026	0.549468	0.589237	0.879541	0.78	0.38	0.299188	FALSE	TRUE	FALSE	FALSE	FALSE	FALSE	FALSE	FALSE	FALSE	FALSE	FALSE	FALSE
Gm17552	ENSMUSG00000097233.1	NA	chr19:4169565-4174284	lincRNA	0.128474	0.101265	0.194952	0.226009	0.26	0.25	0.589865	FALSE	FALSE	FALSE	FALSE	FALSE	FALSE	TRUE	FALSE	FALSE	FALSE	TRUE	FALSE
Gm17250	ENSMUSG00000097235.1	NA	chr2:71748074-71750162	lincRNA	0.585682	0	0.563664	0	0.65	NA	3.60683e-06	TRUE	FALSE	FALSE	FALSE	FALSE	FALSE	TRUE	FALSE	TRUE	FALSE	FALSE	FALSE
4831440E17Rik	ENSMUSG00000097236.1	NA	chr5:25499066-25501541	lincRNA	0.261479	0.250093	0.121192	0.504952	1.18	-0.14	0.447048	FALSE	FALSE	FALSE	FALSE	FALSE	FALSE	TRUE	TRUE	TRUE	TRUE	TRUE	FALSE
Gm16907	ENSMUSG00000097242.1	NA	chr13:63289600-63297147	lincRNA	1.49263	0.327076	1.06782	1.04285	0.65	0.61	1.22062e-19	TRUE	FALSE	FALSE	FALSE	FALSE	FALSE	FALSE	FALSE	FALSE	FALSE	FALSE	FALSE
Gm2694	ENSMUSG00000097248.3	linc1582	chr8:87472811-87525554	lincRNA	3.97982	0.0881059	2.63218	0.275291	-0.86	-1.78	1.68144e-21	TRUE	FALSE	FALSE	FALSE	FALSE	FALSE	TRUE	TRUE	FALSE	FALSE	TRUE	FALSE
Gm26889	ENSMUSG00000097249.1	NA	chr4:58178246-58206635	lincRNA	0.035205	0.493779	0.133542	1.63149	-1.07	-0.7	NA	FALSE	FALSE	FALSE	FALSE	FALSE	FALSE	FALSE	FALSE	FALSE	FALSE	FALSE	FALSE
Gm26771	ENSMUSG00000097250.1	NA	chr3:83773852-83789956	lincRNA	0.169556	0.289212	0.811559	0.493206	0.04	-1.88	NA	FALSE	FALSE	FALSE	FALSE	FALSE	FALSE	TRUE	FALSE	FALSE	FALSE	FALSE	FALSE
C430042M11Rik	ENSMUSG00000097254.1	NA	chr17:83851674-83854393	lincRNA	0.81471	0.0322351	0.255057	0	-1.52	NA	1.25973e-16	TRUE	FALSE	FALSE	FALSE	TRUE	FALSE	FALSE	FALSE	FALSE	FALSE	FALSE	FALSE
Gm26767	ENSMUSG00000097258.1	NA	chr9:97068182-97073429	lincRNA	2.42278	0.248732	1.67794	0.683722	0.94	0.7	2.61534e-16	TRUE	FALSE	FALSE	FALSE	FALSE	FALSE	FALSE	FALSE	TRUE	TRUE	FALSE	TRUE
4933416M07Rik	ENSMUSG00000097262.1	NA	chr8:27142909-27149671	lincRNA	2.51476	0.0544373	1.86988	0.094228	-0.1	0.29	1.91198e-06	TRUE	FALSE	FALSE	FALSE	FALSE	FALSE	FALSE	FALSE	FALSE	FALSE	FALSE	FALSE
Gm26804	ENSMUSG00000097263.1	NA	chr8:20292476-20420781	lincRNA	7.79857	1.93547	6.97397	4.03661	0.99	0.39	0.000722205	TRUE	FALSE	FALSE	FALSE	FALSE	FALSE	FALSE	FALSE	FALSE	FALSE	FALSE	FALSE
Gm26803	ENSMUSG00000097265.1	NA	chr13:83723441-83729582	lincRNA	0.003354	0.735789	0	1.51096	NA	0.15	9.21412e-13	TRUE	FALSE	FALSE	FALSE	FALSE	FALSE	FALSE	TRUE	TRUE	TRUE	FALSE	TRUE
1700109K24Rik	ENSMUSG00000097267.1	NA	chr15:77084442-77096314	lincRNA	0.641223	0.554895	1.2822	2.75747	0.88	0.72	0.347722	FALSE	FALSE	FALSE	FALSE	FALSE	FALSE	FALSE	FALSE	FALSE	FALSE	FALSE	FALSE
Gm9903	ENSMUSG00000097271.1	NA	chr5:33629924-33632092	lincRNA	0.0429438	0.165688	0.0879621	0.280394	0.71	0.09	0.00407076	TRUE	FALSE	FALSE	FALSE	FALSE	FALSE	TRUE	TRUE	FALSE	FALSE	TRUE	FALSE
Gm26649	ENSMUSG00000097272.1	NA	chr1:64029462-64032927	lincRNA	0.925706	5.38429	2.26096	6.72092	0.25	0.34	NA	FALSE	FALSE	FALSE	FALSE	FALSE	FALSE	FALSE	FALSE	FALSE	FALSE	FALSE	FALSE
Gm26648	ENSMUSG00000097275.1	NA	chr5:24696901-24704690	lincRNA	2.35771	0.261541	2.33899	0.820278	-0.19	0.02	1.73287e-32	TRUE	FALSE	FALSE	FALSE	FALSE	FALSE	FALSE	FALSE	FALSE	FALSE	FALSE	FALSE
2900076A07Rik	ENSMUSG00000097277.2	linc1572	chr7:81523549-81531498	lincRNA	4.26971	3.86514	2.46099	7.61121	0.37	0.35	0.0162078	FALSE	FALSE	FALSE	TRUE	FALSE	FALSE	TRUE	TRUE	TRUE	FALSE	TRUE	TRUE
AI849053	ENSMUSG00000097280.1	NA	chr3:88199101-88204595	lincRNA	0	0.795594	0.0146851	0.522888	0.88	-0.09	8.09405e-19	TRUE	FALSE	FALSE	FALSE	FALSE	FALSE	FALSE	FALSE	FALSE	FALSE	TRUE	FALSE
5031415H12Rik	ENSMUSG00000097282.1	NA	chr17:70745328-70755582	lincRNA	0.267696	0.0118572	0.187953	0.0904486	0.73	-0.09	9.1468e-10	TRUE	FALSE	FALSE	FALSE	FALSE	FALSE	FALSE	FALSE	FALSE	FALSE	FALSE	FALSE
4930480K23Rik	ENSMUSG00000097284.2	NA	chr14:69732783-69767113	lincRNA	0.723489	1.09368	0.64746	0.843136	-0.12	-0.14	0.330567	FALSE	FALSE	FALSE	FALSE	FALSE	FALSE	TRUE	TRUE	FALSE	FALSE	TRUE	FALSE
Gm26683	ENSMUSG00000097285.1	NA	chr1:91297202-91304405	lincRNA	4.78581	1.43016	0.319092	0.681183	0.28	-1.57	0.000306844	TRUE	FALSE	FALSE	FALSE	TRUE	FALSE	FALSE	FALSE	FALSE	FALSE	FALSE	FALSE
D130017N08Rik	ENSMUSG00000097287.1	NA	chr5:143758324-143767130	lincRNA	0.279012	0.615876	0.86988	0.723606	-0.69	-0.37	0.037853	FALSE	FALSE	FALSE	FALSE	FALSE	FALSE	FALSE	FALSE	FALSE	FALSE	FALSE	FALSE
2010300F17Rik	ENSMUSG00000097289.1	NA	chr11:96712981-96747436	lincRNA	0.133485	0.0133093	0.166079	0.00201512	-0.11	2.79	1.78603e-05	TRUE	FALSE	FALSE	FALSE	FALSE	FALSE	FALSE	FALSE	FALSE	FALSE	FALSE	FALSE
1300002E11Rik	ENSMUSG00000097290.2	linc1484	chr16:21794346-21809037	lincRNA	8.03082	3.25726	3.36493	5.38846	-0.07	-0.49	7.63286e-07	TRUE	FALSE	FALSE	FALSE	FALSE	FALSE	TRUE	TRUE	FALSE	FALSE	TRUE	FALSE
Gm26888	ENSMUSG00000097294.1	NA	chr11:119151650-119156994	lincRNA	0.126817	0.100353	0.410949	0.717933	0.63	0.12	0.298298	FALSE	TRUE	FALSE	FALSE	FALSE	FALSE	FALSE	FALSE	FALSE	FALSE	FALSE	FALSE
Gm26532	ENSMUSG00000097296.1	NA	chr8:84208919-84209609	lincRNA	12.7893	0.287	2.82559	0.251561	0.38	1.21	5.00207e-38	TRUE	TRUE	FALSE	FALSE	FALSE	FALSE	FALSE	FALSE	FALSE	FALSE	FALSE	FALSE
Gm26835	ENSMUSG00000097300.1	NA	chr10:13967023-14007405	lincRNA	0.0945148	0.114566	0.281527	0.352467	0.28	0.74	0.316989	FALSE	FALSE	FALSE	FALSE	FALSE	FALSE	FALSE	FALSE	FALSE	FALSE	FALSE	FALSE
3110083C13Rik	ENSMUSG00000097303.1	NA	chr14:57999322-58003695	lincRNA	0.150324	0.284749	0.282398	0.103202	0.49	0.57	0.112085	FALSE	FALSE	FALSE	FALSE	FALSE	FALSE	TRUE	TRUE	FALSE	FALSE	TRUE	FALSE
Gm17249	ENSMUSG00000097309.1	NA	chr10:84619331-84622578	lincRNA	0.234073	0.197746	0.542202	0.22021	-0.15	-0.51	0.113764	FALSE	FALSE	FALSE	FALSE	FALSE	FALSE	TRUE	TRUE	FALSE	FALSE	TRUE	FALSE
A930038B10Rik	ENSMUSG00000097310.1	NA	chr14:34759401-34770553	lincRNA	0.100562	0.0168478	0.155964	0	0.28	Inf	0.000336426	TRUE	FALSE	FALSE	FALSE	FALSE	FALSE	FALSE	FALSE	FALSE	FALSE	FALSE	FALSE
Gm26568	ENSMUSG00000097315.1	NA	chr1:136216073-136225071	lincRNA	0.17269	0.089377	0.28753	0.158183	0.5	0.22	0.00212436	TRUE	FALSE	FALSE	FALSE	FALSE	FALSE	FALSE	FALSE	FALSE	FALSE	FALSE	FALSE
1700007L15Rik	ENSMUSG00000097318.1	linc1609	chr16:33379854-33380727	lincRNA	3.68553	2.39787	2.3697	0.620586	-0.75	-1.45	0.0262523	FALSE	FALSE	FALSE	FALSE	FALSE	FALSE	TRUE	TRUE	TRUE	TRUE	TRUE	FALSE
1700028E10Rik	ENSMUSG00000097321.2	NA	chr5:151368674-151396164	lincRNA	0.176534	0.228493	0.176613	0.35799	0.42	0.55	0.202092	FALSE	FALSE	FALSE	FALSE	FALSE	FALSE	TRUE	TRUE	TRUE	FALSE	TRUE	FALSE
4930426I24Rik	ENSMUSG00000097323.1	NA	chr12:76402756-76403654	lincRNA	0.0833808	0.244832	0.0588585	0.471944	-0.56	0.14	0.0586691	FALSE	FALSE	FALSE	FALSE	FALSE	FALSE	TRUE	TRUE	TRUE	FALSE	TRUE	FALSE
Gm16897	ENSMUSG00000097325.1	NA	chr1:194955758-194976959	lincRNA	0.0596431	0.106952	0.102571	0.122808	0.32	0.37	1.11199e-05	TRUE	FALSE	FALSE	FALSE	FALSE	FALSE	TRUE	TRUE	TRUE	FALSE	TRUE	FALSE
4931403G20Rik	ENSMUSG00000097329.1	NA	chr12:69847634-69853671	lincRNA	0.130029	0.0898446	0.254335	0.379529	0.59	0.6	0.481224	FALSE	FALSE	FALSE	FALSE	FALSE	FALSE	FALSE	FALSE	FALSE	FALSE	FALSE	FALSE
Gm26672	ENSMUSG00000097330.1	NA	chr18:37746558-37768242	lincRNA	0.357472	1.70801	1.04716	3.17343	-0.26	-0.42	6.53777e-06	TRUE	FALSE	FALSE	FALSE	FALSE	FALSE	TRUE	TRUE	FALSE	FALSE	FALSE	FALSE
2700012I20Rik	ENSMUSG00000097334.1	NA	chr9:57075215-57076013	lincRNA	0.283305	0.86579	0.339627	0.304521	1.6	0.01	3.7196e-05	TRUE	FALSE	FALSE	FALSE	FALSE	FALSE	TRUE	TRUE	FALSE	FALSE	FALSE	FALSE
Gm26563	ENSMUSG00000097335.1	NA	chr11:80017353-80029868	lincRNA	2.55783	0.133696	5.13402	0.640308	0.22	0.33	3.96519e-20	TRUE	FALSE	FALSE	FALSE	FALSE	FALSE	FALSE	FALSE	FALSE	FALSE	FALSE	FALSE
Gm26606	ENSMUSG00000097337.1	NA	chr4:123898632-123904842	lincRNA	0.0818697	0.308021	0.102639	0.790095	0.56	0.38	0.0677751	FALSE	FALSE	FALSE	FALSE	FALSE	FALSE	TRUE	TRUE	FALSE	FALSE	FALSE	FALSE
Gm26617	ENSMUSG00000097340.1	NA	chrX:94793102-94798237	lincRNA	0.198275	0.620617	0.0931191	0.854364	0.65	-0.69	NA	FALSE	FALSE	FALSE	FALSE	FALSE	FALSE	FALSE	FALSE	FALSE	FALSE	FALSE	FALSE
9030407P20Rik	ENSMUSG00000097343.1	NA	chr7:120673438-120677560	lincRNA	0.661093	3.32592	0.336675	0.786989	-0.11	-0.02	5.74984e-26	TRUE	FALSE	FALSE	FALSE	FALSE	FALSE	TRUE	TRUE	FALSE	FALSE	FALSE	FALSE
AA543186	ENSMUSG00000097345.1	NA	chr2:25327449-25332571	lincRNA	0.0949365	0.182514	0.080529	0.182211	0.53	-0.56	0.0476823	FALSE	FALSE	FALSE	FALSE	FALSE	FALSE	TRUE	TRUE	TRUE	FALSE	TRUE	FALSE
Gm26619	ENSMUSG00000097346.1	NA	chr13:97751111-97760965	lincRNA	0.741379	0.603611	5.69626	1.0038	-2.41	-0.84	0.789656	FALSE	FALSE	FALSE	FALSE	FALSE	FALSE	FALSE	FALSE	FALSE	FALSE	FALSE	FALSE
Gm17275	ENSMUSG00000097347.1	NA	chr1:180802567-180809483	lincRNA	64.4964	54.0314	55.7109	43.6041	-0.7	-0.65	3.82329e-09	TRUE	FALSE	FALSE	FALSE	FALSE	FALSE	FALSE	FALSE	FALSE	FALSE	FALSE	FALSE
4732491K20Rik	ENSMUSG00000097350.1	NA	chr17:12318884-12327250	lincRNA	0.128958	0.555687	0.0946668	0.537328	-0.03	0.24	1.3134e-15	TRUE	FALSE	FALSE	FALSE	FALSE	FALSE	TRUE	TRUE	TRUE	FALSE	FALSE	FALSE
A430046D13Rik	ENSMUSG00000097353.1	NA	chr10:128499363-128504242	lincRNA	0.339677	0.791032	0.273712	0.834044	0.51	0.3	5.24649e-06	TRUE	FALSE	FALSE	FALSE	FALSE	FALSE	TRUE	TRUE	FALSE	FALSE	TRUE	FALSE
2310001H17Rik	ENSMUSG00000097354.2	NA	chr6:129208411-129237982	lincRNA	0.149042	0.192277	0.128259	0.105396	-1.53	-0.82	0.391357	FALSE	FALSE	FALSE	FALSE	FALSE	FALSE	FALSE	FALSE	TRUE	TRUE	FALSE	TRUE
Gm16793	ENSMUSG00000097357.1	NA	chr8:35582571-35588972	lincRNA	0.00785538	0.19079	0.0232733	0.182784	-0.07	0.21	1.1785e-05	TRUE	FALSE	FALSE	FALSE	FALSE	FALSE	TRUE	TRUE	FALSE	FALSE	FALSE	FALSE
C030034L19Rik	ENSMUSG00000097365.2	NA	chr3:9403063-9437233	lincRNA	0.0351232	0.508204	0.0491286	0.677529	0.28	0.25	1.04728e-07	TRUE	FALSE	FALSE	FALSE	FALSE	FALSE	FALSE	TRUE	FALSE	FALSE	TRUE	FALSE
Gm26718	ENSMUSG00000097367.1	NA	chr5:110259162-110269847	lincRNA	29.5715	17.8185	21.364	12.282	-0.45	-0.61	NA	FALSE	FALSE	FALSE	FALSE	FALSE	FALSE	FALSE	FALSE	FALSE	FALSE	FALSE	FALSE
Gm10390	ENSMUSG00000097368.1	NA	chr5:120121102-120139263	lincRNA	0.613033	0.403496	1.40071	0.344221	0.66	-0.01	3.26516e-18	TRUE	FALSE	FALSE	FALSE	FALSE	FALSE	FALSE	FALSE	FALSE	FALSE	FALSE	FALSE
6720427I07Rik	ENSMUSG00000097375.2	NA	chr13:48535522-48537822	lincRNA	12.6677	1.33637	4.04276	1.70558	0.52	0.46	3.79691e-08	TRUE	TRUE	FALSE	FALSE	FALSE	FALSE	FALSE	FALSE	FALSE	FALSE	FALSE	FALSE
Gm10822	ENSMUSG00000097377.1	NA	chr2:73892995-73900850	lincRNA	0.0436017	0.0979392	0.0572782	0.177324	0.6	0.64	0.0535168	FALSE	FALSE	FALSE	FALSE	FALSE	FALSE	TRUE	TRUE	FALSE	FALSE	TRUE	FALSE
B230208H11Rik	ENSMUSG00000097378.2	NA	chr10:12916647-12923100	lincRNA	0.135208	0.221057	0.447633	0.230665	0.09	-0.29	0.0540895	FALSE	FALSE	FALSE	FALSE	FALSE	FALSE	TRUE	TRUE	TRUE	FALSE	TRUE	TRUE
Gm26873	ENSMUSG00000097379.1	NA	chr17:17389942-17395303	lincRNA	8.34922	0.655954	4.87462	1.69356	0.44	0.11	5.99017e-18	TRUE	FALSE	FALSE	FALSE	FALSE	FALSE	FALSE	FALSE	FALSE	FALSE	FALSE	FALSE
Gm26816	ENSMUSG00000097380.1	NA	chr8:110863228-110940314	lincRNA	0.759244	0.316436	1.29168	0.769685	-0.09	0.93	0.00048421	TRUE	FALSE	FALSE	TRUE	FALSE	FALSE	FALSE	FALSE	FALSE	FALSE	FALSE	FALSE
Gm26785	ENSMUSG00000097390.1	NA	chr17:46273478-46280060	lincRNA	1.01594	0.231241	1.39292	1.6685	0.47	0.11	1.59259e-07	TRUE	FALSE	FALSE	FALSE	FALSE	FALSE	FALSE	FALSE	FALSE	FALSE	FALSE	FALSE
Mirg	ENSMUSG00000097391.3	NA	chr12:109729763-109749460	lincRNA	27.2549	0.0202755	21.7605	1.94092	0.42	0.55	NA	FALSE	TRUE	FALSE	FALSE	FALSE	FALSE	FALSE	FALSE	FALSE	FALSE	FALSE	FALSE
D930016D06Rik	ENSMUSG00000097392.1	linc1540	chr5:104525734-104554211	lincRNA	6.45	1.10447	4.79358	6.11515	0.53	0.32	3.04984e-06	TRUE	FALSE	FALSE	FALSE	FALSE	FALSE	FALSE	FALSE	FALSE	FALSE	TRUE	FALSE
D030068K23Rik	ENSMUSG00000097393.2	NA	chr8:109075221-109273811	lincRNA	0.373718	0.14921	0.853753	0.394407	-0.39	0.37	0.004517	TRUE	FALSE	FALSE	FALSE	TRUE	FALSE	TRUE	TRUE	TRUE	FALSE	TRUE	TRUE
Gm16861	ENSMUSG00000097397.1	NA	chr16:4935047-4939585	lincRNA	5.00873	15.8462	4.85811	9.19766	0.05	-0.24	0.31766	FALSE	FALSE	FALSE	FALSE	FALSE	FALSE	TRUE	TRUE	FALSE	FALSE	FALSE	FALSE
2410088K16Rik	ENSMUSG00000097398.2	NA	chr1:88754889-88755736	lincRNA	1.00239	0.00806071	0.62932	0	-1.71	NA	4.43554e-08	TRUE	FALSE	FALSE	FALSE	TRUE	FALSE	FALSE	FALSE	FALSE	FALSE	FALSE	FALSE
Gm17399	ENSMUSG00000097402.1	NA	chr9:118150230-118170376	lincRNA	0.008721	0.447832	0.00930541	0.0975442	3.34	0.94	8.6239e-09	TRUE	FALSE	FALSE	FALSE	FALSE	FALSE	TRUE	TRUE	FALSE	FALSE	TRUE	FALSE
9230116N13Rik	ENSMUSG00000097403.1	NA	chr1:136411915-136415519	lincRNA	0.503591	0.156194	0.371547	0.222106	-0.24	0.29	4.00203e-08	TRUE	FALSE	FALSE	FALSE	FALSE	FALSE	TRUE	TRUE	FALSE	FALSE	TRUE	FALSE
Gm10814	ENSMUSG00000097404.1	NA	chr19:6012619-6018426	lincRNA	0.184569	0.0217824	0.24535	0.316845	0.01	-0.03	0.00231628	TRUE	FALSE	FALSE	FALSE	FALSE	FALSE	FALSE	FALSE	FALSE	FALSE	FALSE	FALSE
Gm26668	ENSMUSG00000097410.1	NA	chr11:102863336-103075903	lincRNA	0.632818	0.16938	1.95803	1.20827	0.73	0.31	2.34759e-06	TRUE	TRUE	FALSE	FALSE	FALSE	TRUE	FALSE	FALSE	FALSE	FALSE	FALSE	FALSE
1810014B01Rik	ENSMUSG00000097412.1	NA	chr10:86685600-86694806	lincRNA	0.629499	0.25603	0.521992	0.222078	-0.2	-0.92	1.26387e-11	TRUE	FALSE	FALSE	FALSE	FALSE	FALSE	FALSE	TRUE	FALSE	FALSE	FALSE	FALSE
AU020206	ENSMUSG00000097415.1	linc1386	chr7:75769761-75782099	lincRNA	11.9333	4.12916	11.7974	6.38906	0.14	-0.01	2.57823e-05	TRUE	FALSE	FALSE	FALSE	FALSE	FALSE	TRUE	FALSE	FALSE	FALSE	FALSE	TRUE
Gm26669	ENSMUSG00000097417.1	NA	chr12:80108033-80113000	lincRNA	11.4422	17.325	19.0263	26.9695	-0.59	-0.14	0.0333108	FALSE	FALSE	FALSE	FALSE	FALSE	FALSE	FALSE	FALSE	FALSE	FALSE	FALSE	FALSE
Gm26667	ENSMUSG00000097418.2	NA	chr16:84703166-84715245	lincRNA	0.462811	0.137775	0.304508	0.229686	0.54	0.57	0.00123169	TRUE	TRUE	FALSE	FALSE	FALSE	FALSE	FALSE	FALSE	FALSE	FALSE	FALSE	FALSE
Gm26666	ENSMUSG00000097419.1	NA	chr6:145047558-145050430	lincRNA	0.476589	0.00996443	1.26639	0.0725253	0.47	0.36	4.20832e-11	TRUE	FALSE	FALSE	FALSE	FALSE	FALSE	TRUE	FALSE	TRUE	TRUE	FALSE	FALSE
AW047730	ENSMUSG00000097428.1	NA	chr3:88200622-88203481	processed_transcript	0.00652577	8.24844	0	4.81928	Inf	-0.23	2.20119e-31	TRUE	FALSE	FALSE	FALSE	FALSE	FALSE	FALSE	FALSE	FALSE	FALSE	FALSE	FALSE
Gm26520	ENSMUSG00000097429.1	NA	chr12:3343815-3357153	lincRNA	0.192157	0.0235363	0.241108	0.0182192	0.11	0.72	3.56845e-05	TRUE	FALSE	FALSE	FALSE	FALSE	FALSE	TRUE	FALSE	FALSE	FALSE	FALSE	FALSE
Gm10544	ENSMUSG00000097430.1	NA	chr18:37159854-37178522	lincRNA	0.0102381	0.442275	0	0.441647	Inf	-0.27	1.91126e-11	TRUE	FALSE	FALSE	FALSE	FALSE	FALSE	FALSE	FALSE	FALSE	TRUE	FALSE	FALSE
Gm26782	ENSMUSG00000097431.1	NA	chr14:50870363-50879003	lincRNA	3.17073	0.0496131	0.526131	0.0522384	0.07	0.94	5.07438e-32	TRUE	FALSE	FALSE	FALSE	FALSE	FALSE	TRUE	FALSE	FALSE	FALSE	FALSE	FALSE
Gm20603	ENSMUSG00000097432.1	NA	chr9:21028306-21032357	lincRNA	1.16024	0.0382331	2.2808	0.0996133	0.11	-0.57	2.26519e-09	TRUE	TRUE	FALSE	FALSE	FALSE	FALSE	TRUE	TRUE	TRUE	FALSE	FALSE	FALSE
Gm16754	ENSMUSG00000097439.1	NA	chr9:21225370-21232639	lincRNA	0.158143	0.0127449	0.0980016	0.0429824	0.54	-0.64	0.00189132	TRUE	FALSE	FALSE	FALSE	FALSE	FALSE	TRUE	FALSE	FALSE	FALSE	FALSE	FALSE
Gm26631	ENSMUSG00000097445.1	NA	chr9:57531286-57537629	lincRNA	0.399913	0.277822	0.964136	0.421068	-0.16	0.05	0.0172713	FALSE	FALSE	FALSE	FALSE	FALSE	FALSE	TRUE	TRUE	TRUE	FALSE	FALSE	FALSE
Gm16880	ENSMUSG00000097448.1	linc1423	chr1:136696210-136726142	lincRNA	2.96304	0.0085567	3.60744	0.0230673	0.13	0.06	1.58853e-24	TRUE	FALSE	TRUE	FALSE	FALSE	FALSE	FALSE	FALSE	TRUE	TRUE	FALSE	FALSE
Rian	ENSMUSG00000097451.4	linc1458	chr12:109603939-109661716	processed_transcript	449.092	0.189552	311.062	45.5973	0.54	0.41	NA	FALSE	TRUE	FALSE	TRUE	FALSE	FALSE	FALSE	FALSE	FALSE	FALSE	FALSE	FALSE
Gm26892	ENSMUSG00000097454.1	NA	chr1:132036804-132067945	lincRNA	0.190526	0.0714993	0.116827	0.0912521	0.42	0.29	NA	FALSE	FALSE	FALSE	FALSE	FALSE	FALSE	FALSE	FALSE	FALSE	FALSE	FALSE	FALSE
Gm16958	ENSMUSG00000097456.2	NA	chr3:127161304-127168288	lincRNA	0.0555079	3.10758	0.056262	3.21681	-0.65	-0.48	2.69122e-07	TRUE	FALSE	FALSE	FALSE	FALSE	FALSE	FALSE	TRUE	FALSE	FALSE	FALSE	FALSE
2310031A07Rik	ENSMUSG00000097457.1	NA	chr11:46440361-46447248	lincRNA	12.191	4.44483	13.1152	8.15086	-0.18	-0.62	0.00205601	TRUE	FALSE	FALSE	FALSE	TRUE	FALSE	FALSE	FALSE	FALSE	FALSE	FALSE	FALSE
Gm26734	ENSMUSG00000097460.1	NA	chr17:94834905-94836642	lincRNA	0.162765	0.147042	0.0705625	0.130671	0.93	-1.06	0.671721	FALSE	FALSE	FALSE	FALSE	FALSE	FALSE	TRUE	TRUE	FALSE	FALSE	TRUE	FALSE
Gm26737	ENSMUSG00000097467.1	NA	chr9:44112922-44121947	lincRNA	1.30689	4.41814	1.64049	2.35237	-1.04	-0.77	0.000426723	TRUE	FALSE	FALSE	FALSE	FALSE	FALSE	FALSE	TRUE	FALSE	TRUE	FALSE	FALSE
2310010G23Rik	ENSMUSG00000097468.1	linc1408	chrX:36814770-36817185	lincRNA	3.65611	0.582546	2.20954	0.736052	-0.85	-0.68	NA	FALSE	FALSE	FALSE	FALSE	FALSE	FALSE	FALSE	FALSE	TRUE	TRUE	FALSE	FALSE
Gm26586	ENSMUSG00000097472.1	NA	chr8:72137388-72140820	lincRNA	2.17089	0.272589	1.25634	1.30488	0.65	0.46	4.75531e-26	TRUE	FALSE	FALSE	FALSE	FALSE	FALSE	FALSE	FALSE	FALSE	FALSE	FALSE	FALSE
Gm26582	ENSMUSG00000097479.1	NA	chr5:92043063-92055960	lincRNA	0.111837	0.0305564	0.247438	0.0323009	0.48	0.82	1.4606e-26	TRUE	FALSE	FALSE	FALSE	FALSE	FALSE	TRUE	TRUE	FALSE	FALSE	FALSE	FALSE
Gm17733	ENSMUSG00000097486.1	NA	chr6:115127601-115134772	lincRNA	0.0924119	0.409054	0.0381417	0.177468	-Inf	-0.7	0.000257986	TRUE	FALSE	FALSE	FALSE	FALSE	FALSE	TRUE	TRUE	FALSE	FALSE	FALSE	FALSE
4732487G21Rik	ENSMUSG00000097488.1	NA	chr12:86290760-86306006	lincRNA	0.813044	1.71947	0.990647	2.46233	0.33	0.27	0.0195061	FALSE	FALSE	FALSE	FALSE	FALSE	FALSE	FALSE	FALSE	TRUE	FALSE	FALSE	FALSE
9930014A18Rik	ENSMUSG00000097493.2	NA	chr15:60822270-60831793	lincRNA	1.78496	4.60678	1.54155	3.67209	-0.64	-0.66	0.00246849	TRUE	FALSE	FALSE	FALSE	FALSE	FALSE	TRUE	TRUE	FALSE	FALSE	TRUE	FALSE
Gm26652	ENSMUSG00000097497.1	NA	chrX:19224788-19237856	lincRNA	0.213689	0.00202765	0.30032	0.177707	1.94	-0.63	0.00643006	TRUE	FALSE	FALSE	FALSE	FALSE	FALSE	FALSE	FALSE	FALSE	FALSE	FALSE	FALSE
3110045C21Rik	ENSMUSG00000097503.1	NA	chr1:169969408-169972395	lincRNA	0.555126	0.709006	0	0.195633	Inf	0.17	0.323329	FALSE	FALSE	FALSE	FALSE	FALSE	FALSE	TRUE	TRUE	FALSE	FALSE	TRUE	FALSE
4930516B21Rik	ENSMUSG00000097504.1	NA	chr9:119440277-119444830	lincRNA	2.4943	0.397639	2.56489	1.16293	-0.18	-0.05	5.94221e-13	TRUE	FALSE	FALSE	FALSE	FALSE	FALSE	TRUE	TRUE	FALSE	FALSE	FALSE	FALSE
Gm26540	ENSMUSG00000097505.1	NA	chr6:148988728-148991431	lincRNA	0.961881	1.02769	0.667132	2.94144	0.49	-0.55	NA	FALSE	FALSE	FALSE	FALSE	FALSE	FALSE	FALSE	FALSE	FALSE	FALSE	FALSE	FALSE
Gm26538	ENSMUSG00000097507.1	NA	chr18:34796894-34803484	lincRNA	0.643975	0.17062	0.913091	0.51113	0.56	0.43	3.45227e-05	TRUE	FALSE	FALSE	FALSE	FALSE	FALSE	FALSE	FALSE	FALSE	FALSE	FALSE	FALSE
1700040D17Rik	ENSMUSG00000097515.1	NA	chr3:94409394-94412883	lincRNA	0.0135645	1.06836	0	0.650388	Inf	0.08	1.71253e-09	TRUE	FALSE	FALSE	FALSE	FALSE	FALSE	FALSE	TRUE	FALSE	TRUE	FALSE	FALSE
Gm26694	ENSMUSG00000097518.1	NA	chr17:25794893-25964784	lincRNA	8.72055	226.385	7.15688	55.8574	-0.38	-0.5	2.06364e-23	TRUE	TRUE	FALSE	FALSE	FALSE	FALSE	FALSE	TRUE	FALSE	FALSE	TRUE	FALSE
4930558J18Rik	ENSMUSG00000097519.2	linc1231	chr1:57359221-57377544	lincRNA	1.97962	0.522108	1.85815	1.04106	-0.74	-0.42	3.07404e-07	TRUE	FALSE	FALSE	FALSE	FALSE	FALSE	TRUE	TRUE	FALSE	FALSE	FALSE	FALSE
1700022N22Rik	ENSMUSG00000097523.1	NA	chr17:25985814-25988469	lincRNA	0.409066	0.325517	0.598288	0.653775	-0.28	0.3	0.186929	FALSE	FALSE	FALSE	FALSE	FALSE	FALSE	TRUE	TRUE	TRUE	FALSE	TRUE	FALSE
Gm26845	ENSMUSG00000097525.1	NA	chr6:127108388-127110467	lincRNA	0.353808	0.075217	0.324618	0.0500946	0.27	0.94	0.00217791	TRUE	FALSE	FALSE	FALSE	FALSE	FALSE	TRUE	TRUE	TRUE	FALSE	FALSE	FALSE
Gm26847	ENSMUSG00000097526.1	NA	chr10:128230589-128232790	lincRNA	0.132945	0.0425294	0.213333	0.0164606	0.67	1.53	0.0356822	FALSE	FALSE	FALSE	FALSE	FALSE	FALSE	TRUE	TRUE	FALSE	FALSE	FALSE	FALSE
Gm16675	ENSMUSG00000097534.1	NA	chr8:46730971-46739515	lincRNA	0.0178728	0.205844	0.0131648	0.170653	1.26	0.54	1.61974e-05	TRUE	FALSE	FALSE	FALSE	FALSE	FALSE	FALSE	TRUE	FALSE	FALSE	TRUE	FALSE
Gm26592	ENSMUSG00000097535.1	NA	chr9:21034289-21037782	lincRNA	0.200191	0.188616	0.364951	0.168956	0.34	-0.44	0.000686037	TRUE	FALSE	FALSE	FALSE	FALSE	FALSE	TRUE	FALSE	FALSE	FALSE	FALSE	FALSE
2610037D02Rik	ENSMUSG00000097536.2	linc1294	chr15:96134818-96284495	lincRNA	7.6129	0.813207	1.55983	2.93432	0.81	0.34	6.92804e-11	TRUE	FALSE	FALSE	FALSE	FALSE	FALSE	TRUE	TRUE	FALSE	FALSE	TRUE	TRUE
2610020C07Rik	ENSMUSG00000097537.1	NA	chr16:11203382-11225796	lincRNA	0.976388	0.636965	1.00868	1.52252	0.78	-0.07	1.55043e-14	TRUE	FALSE	FALSE	FALSE	FALSE	FALSE	TRUE	TRUE	FALSE	FALSE	TRUE	FALSE
1700037F24Rik	ENSMUSG00000097540.1	NA	chr1:132201068-132203803	lincRNA	0.167921	0.0297008	1.10845	0.116567	0.48	-1.67	0.0318381	FALSE	FALSE	FALSE	FALSE	FALSE	FALSE	FALSE	FALSE	FALSE	FALSE	FALSE	FALSE
Gm26751	ENSMUSG00000097542.1	NA	chr14:55864310-55874735	lincRNA	3.6427	1.74998	2.79561	7.49139	0.29	0.6	NA	FALSE	FALSE	FALSE	FALSE	FALSE	FALSE	FALSE	FALSE	FALSE	FALSE	TRUE	FALSE
A930011O12Rik	ENSMUSG00000097545.2	NA	chr14:64587330-64593961	lincRNA	0.781343	0.128422	0.72336	0.104311	1.17	0.98	0.000240437	TRUE	TRUE	FALSE	FALSE	FALSE	FALSE	TRUE	FALSE	TRUE	TRUE	FALSE	FALSE
Gm26749	ENSMUSG00000097546.1	NA	chr17:74575380-74617119	lincRNA	1.38831	0.601206	2.41169	1.43071	-0.72	-0.38	0.00312529	TRUE	FALSE	FALSE	FALSE	FALSE	TRUE	FALSE	FALSE	FALSE	FALSE	FALSE	FALSE
Gm26639	ENSMUSG00000097562.1	NA	chr13:65590292-65591561	lincRNA	1.71236	0.0130146	0.799375	0	0.43	NA	9.50285e-09	TRUE	FALSE	FALSE	FALSE	FALSE	FALSE	FALSE	FALSE	FALSE	FALSE	FALSE	FALSE
C430014B12Rik	ENSMUSG00000097564.2	NA	chr1:82691927-82725169	lincRNA	0.0385902	0.102367	0.00338367	0.228519	4.12	-0.54	0.185537	FALSE	FALSE	FALSE	FALSE	FALSE	FALSE	TRUE	TRUE	FALSE	FALSE	TRUE	TRUE
A930024N18Rik	ENSMUSG00000097566.1	NA	chr17:15374999-15379475	lincRNA	0.505727	2.27105	1.03327	1.52085	-0.48	-0.15	4.31868e-15	TRUE	FALSE	FALSE	FALSE	FALSE	FALSE	TRUE	TRUE	FALSE	FALSE	FALSE	TRUE
Gm26640	ENSMUSG00000097569.1	NA	chr6:72953235-72957249	lincRNA	0.179702	0.0524842	0.190034	0.127992	-0.64	1.2	0.00293886	TRUE	FALSE	FALSE	FALSE	TRUE	FALSE	FALSE	FALSE	FALSE	FALSE	FALSE	FALSE
Jpx	ENSMUSG00000097571.3	NA	chrX:103493557-103506425	lincRNA	0.0853797	0.739263	0.347805	0.759768	-0.9	0.39	3.27215e-10	TRUE	FALSE	FALSE	FALSE	FALSE	FALSE	FALSE	TRUE	FALSE	FALSE	FALSE	FALSE
C920006O11Rik	ENSMUSG00000097574.1	NA	chr9:78175913-78178879	lincRNA	2.35397	1.8554	1.57042	1.13012	-0.13	0.72	0.432993	FALSE	FALSE	FALSE	FALSE	FALSE	FALSE	TRUE	TRUE	TRUE	TRUE	TRUE	FALSE
D930030I03Rik	ENSMUSG00000097576.1	NA	chr16:38451981-38453493	lincRNA	0.381246	0.256853	0.198378	0.321451	1.6	-0.28	0.116738	FALSE	FALSE	FALSE	FALSE	FALSE	FALSE	TRUE	TRUE	FALSE	FALSE	FALSE	FALSE
6230400D17Rik	ENSMUSG00000097577.1	NA	chr14:20687235-20703012	lincRNA	2.34041	3.24213	3.19158	3.87734	0.16	0.3	0.0484979	FALSE	TRUE	TRUE	FALSE	FALSE	FALSE	TRUE	TRUE	FALSE	FALSE	TRUE	FALSE
Gm26798	ENSMUSG00000097578.1	NA	chr15:89211558-89215012	lincRNA	0.288034	0.217874	0.303945	0.617545	0.85	0.32	0.303517	FALSE	FALSE	FALSE	FALSE	FALSE	FALSE	FALSE	FALSE	FALSE	FALSE	FALSE	FALSE
Gm26799	ENSMUSG00000097579.1	NA	chr6:112696776-112704668	lincRNA	0.256302	0.153921	0.0522588	0.207775	1.49	0.56	0.13563	FALSE	FALSE	FALSE	FALSE	FALSE	FALSE	TRUE	TRUE	TRUE	FALSE	TRUE	FALSE
Gm26527	ENSMUSG00000097582.1	NA	chr13:93940989-93943015	lincRNA	0.296811	3.96103	0.314604	5.15762	1.55	0.2	NA	FALSE	FALSE	FALSE	FALSE	FALSE	FALSE	FALSE	FALSE	FALSE	FALSE	TRUE	FALSE
6430590A07Rik	ENSMUSG00000097583.1	NA	chr3:40885896-40894123	lincRNA	0.299744	0.304397	0.225038	0.277992	1.44	1.77	0.973489	FALSE	FALSE	FALSE	FALSE	FALSE	FALSE	FALSE	TRUE	FALSE	FALSE	FALSE	FALSE
4930578M01Rik	ENSMUSG00000097587.1	NA	chr15:98985964-98989281	lincRNA	0.289914	0.110565	0.13373	0.118278	-0.31	-0.38	0.0197325	FALSE	FALSE	FALSE	FALSE	FALSE	FALSE	TRUE	FALSE	FALSE	FALSE	TRUE	FALSE
Gm17388	ENSMUSG00000097588.2	NA	chr4:136355773-136359440	lincRNA	0.504462	0.217131	0.940615	1.58944	0.86	0.71	0.000924386	TRUE	FALSE	FALSE	FALSE	FALSE	FALSE	FALSE	FALSE	FALSE	FALSE	FALSE	FALSE
Dleu2	ENSMUSG00000097589.4	NA	chr14:61602838-61682373	processed_transcript	3.15517	0.864192	1.80872	1.50502	0.46	-0.01	1.06116e-06	TRUE	TRUE	FALSE	FALSE	FALSE	FALSE	TRUE	TRUE	TRUE	FALSE	TRUE	FALSE
Gm26675	ENSMUSG00000097590.1	NA	chr16:3862383-3884505	lincRNA	3.6627	1.43316	2.3378	2.44533	0.12	-0.25	NA	FALSE	FALSE	FALSE	FALSE	FALSE	FALSE	FALSE	FALSE	FALSE	FALSE	FALSE	FALSE
Gm26673	ENSMUSG00000097596.1	NA	chr6:126718683-126741601	lincRNA	0.0383595	0.272446	0.0781665	2.594	-0.69	-0.44	NA	FALSE	FALSE	FALSE	FALSE	FALSE	FALSE	FALSE	FALSE	FALSE	FALSE	FALSE	FALSE
Gm26674	ENSMUSG00000097597.1	NA	chr10:8884593-8886880	lincRNA	0.300382	0.509917	0.641508	0.349128	0.23	-0.31	0.435123	FALSE	FALSE	FALSE	FALSE	FALSE	FALSE	TRUE	FALSE	FALSE	FALSE	TRUE	FALSE
Gm26660	ENSMUSG00000097601.1	NA	chr14:25355800-25378635	lincRNA	0.02324	0.243802	0.0304538	0.354224	0.18	0.43	2.50788e-06	TRUE	FALSE	FALSE	FALSE	FALSE	FALSE	TRUE	TRUE	TRUE	FALSE	TRUE	TRUE
Gm17322	ENSMUSG00000097604.1	NA	chr9:57998040-58007451	lincRNA	1.38306	0.00700781	1.53702	0.00368881	-0.67	-Inf	2.0485e-21	TRUE	FALSE	FALSE	FALSE	FALSE	FALSE	FALSE	FALSE	FALSE	FALSE	FALSE	FALSE
mmu-mir-3061	ENSMUSG00000097605.1	NA	chr11:52124529-52127779	lincRNA	1.59717	1.47757	3.18533	3.19754	0.47	-0.13	NA	FALSE	TRUE	FALSE	FALSE	FALSE	FALSE	FALSE	FALSE	FALSE	FALSE	FALSE	FALSE
A930012L18Rik	ENSMUSG00000097610.1	NA	chr18:44661664-44676271	lincRNA	0.129804	0.70898	0.128563	1.87454	0.11	-0.32	2.47426e-05	TRUE	FALSE	FALSE	FALSE	FALSE	FALSE	TRUE	TRUE	TRUE	FALSE	TRUE	FALSE
Gm2061	ENSMUSG00000097615.1	NA	chr1:185447115-185455568	lincRNA	0.0546159	0.141522	0.0543185	0.356078	-2.68	-0.1	NA	FALSE	FALSE	FALSE	FALSE	FALSE	FALSE	TRUE	TRUE	FALSE	FALSE	FALSE	FALSE
1110019D14Rik	ENSMUSG00000097616.2	linc1544	chr6:13871525-14044373	lincRNA	0.645541	0.580165	1.97183	0.763527	-0.24	-1.38	0.459368	FALSE	FALSE	FALSE	FALSE	FALSE	FALSE	TRUE	TRUE	FALSE	FALSE	TRUE	FALSE
Gm10687	ENSMUSG00000097617.1	NA	chr9:44123767-44134485	lincRNA	0.140397	0.373396	0.459102	0.450111	-0.27	-0.69	0.0034815	TRUE	FALSE	FALSE	FALSE	FALSE	FALSE	TRUE	TRUE	FALSE	FALSE	FALSE	FALSE
Gm26507	ENSMUSG00000097618.1	NA	chr18:58210251-58221885	lincRNA	0.00820567	0.285154	0.0271658	0.731099	-1.14	0	1.01537e-06	TRUE	FALSE	FALSE	FALSE	FALSE	FALSE	FALSE	TRUE	FALSE	FALSE	FALSE	FALSE
Gm26562	ENSMUSG00000097621.1	NA	chr16:30200909-30205879	lincRNA	0.339186	0.0404805	0.250421	0.0353103	0.24	0.52	1.51241e-09	TRUE	FALSE	FALSE	FALSE	FALSE	FALSE	TRUE	FALSE	TRUE	TRUE	FALSE	FALSE
B230323A14Rik	ENSMUSG00000097623.2	NA	chr9:69758739-69830845	lincRNA	0.0200222	0.322567	0.00103995	1.14543	0.93	0.15	NA	FALSE	FALSE	FALSE	FALSE	FALSE	FALSE	TRUE	TRUE	TRUE	TRUE	FALSE	FALSE
Gm5091	ENSMUSG00000097624.1	linc1304	chr17:15231584-15240783	lincRNA	0.445636	0.00592261	3.31614	0	-0.56	Inf	1.39643e-07	TRUE	FALSE	FALSE	FALSE	TRUE	FALSE	TRUE	FALSE	TRUE	FALSE	FALSE	FALSE
Gm26561	ENSMUSG00000097625.1	NA	chr17:70878077-71393284	lincRNA	0.221233	0.391646	1.23688	0.284784	-1.93	-0.56	9.0038e-07	TRUE	FALSE	FALSE	FALSE	FALSE	FALSE	FALSE	FALSE	FALSE	FALSE	FALSE	FALSE
4921504A21Rik	ENSMUSG00000097626.1	NA	chr5:19202367-19226555	lincRNA	0.0232126	0.133068	0.0077504	0.155102	1.2	0.12	0.000580156	TRUE	FALSE	FALSE	FALSE	FALSE	FALSE	TRUE	TRUE	FALSE	FALSE	FALSE	FALSE
Gm16617	ENSMUSG00000097633.1	NA	chr14:51986388-51988829	lincRNA	0.0934586	2.70455	0.377449	5.76069	1.02	-0.06	6.20311e-09	TRUE	FALSE	FALSE	FALSE	FALSE	FALSE	FALSE	FALSE	FALSE	FALSE	FALSE	FALSE
Gm26827	ENSMUSG00000097634.1	NA	chr7:66109514-66173121	lincRNA	11.0982	19.1181	7.26565	28.8715	-0.02	-0.33	NA	FALSE	FALSE	TRUE	FALSE	FALSE	FALSE	FALSE	FALSE	FALSE	FALSE	FALSE	FALSE
5830416P10Rik	ENSMUSG00000097636.2	NA	chr19:53441211-53464796	lincRNA	0.29975	0.0695244	0.29363	0.0132081	-0.85	0.03	9.93534e-06	TRUE	FALSE	FALSE	FALSE	FALSE	FALSE	FALSE	FALSE	TRUE	FALSE	FALSE	FALSE
C430002E04Rik	ENSMUSG00000097639.1	linc1333	chr3:41488803-41493192	lincRNA	6.52237	0.00423209	7.3261	0.0158193	0.06	1.18	1.46297e-23	TRUE	FALSE	FALSE	FALSE	TRUE	FALSE	TRUE	FALSE	FALSE	FALSE	FALSE	FALSE
Gm20033	ENSMUSG00000097640.2	NA	chr5:64708206-64804117	processed_transcript	0.227861	1.36371	0.27595	0.252016	-1.07	0.31	0.00467091	TRUE	FALSE	FALSE	FALSE	FALSE	FALSE	TRUE	TRUE	FALSE	FALSE	TRUE	FALSE
Gm26862	ENSMUSG00000097644.1	NA	chr7:93006981-93104789	lincRNA	0.132912	0.709722	0.0855786	0.161031	-0.39	0.9	1.4723e-05	TRUE	FALSE	FALSE	FALSE	FALSE	FALSE	FALSE	TRUE	FALSE	FALSE	TRUE	TRUE
9330185C12Rik	ENSMUSG00000097648.1	NA	chr1:113891384-113964134	lincRNA	1.51795	2.13697	3.26228	1.72169	-0.13	-1.22	1.53491e-06	TRUE	FALSE	FALSE	FALSE	TRUE	FALSE	FALSE	FALSE	TRUE	TRUE	FALSE	FALSE
4930461G14Rik	ENSMUSG00000097651.1	linc1588	chr9:58455172-58469623	lincRNA	15.5751	0.00373931	5.60268	0.00240228	-0.02	-0.06	2.91126e-27	TRUE	FALSE	FALSE	FALSE	TRUE	TRUE	TRUE	FALSE	TRUE	TRUE	TRUE	TRUE
Gm16755	ENSMUSG00000097658.1	NA	chr11:120486338-120488582	lincRNA	11.6235	16.0895	12.1009	5.75496	-0.04	-0.31	9.03287e-09	TRUE	FALSE	FALSE	FALSE	FALSE	FALSE	FALSE	FALSE	TRUE	FALSE	FALSE	FALSE
Gm26715	ENSMUSG00000097659.1	NA	chr13:66349395-66365772	lincRNA	2.11328	0.00125563	0.292782	0	-0.52	NA	1.24382e-12	TRUE	FALSE	FALSE	FALSE	FALSE	FALSE	FALSE	FALSE	FALSE	FALSE	FALSE	FALSE
Gm26762	ENSMUSG00000097660.1	NA	chr7:34224754-34230236	lincRNA	0.47889	0.607859	1.60625	0.934192	0.27	0.82	0.254924	FALSE	FALSE	FALSE	FALSE	FALSE	FALSE	FALSE	FALSE	FALSE	FALSE	FALSE	FALSE
Gm26763	ENSMUSG00000097661.1	NA	chr4:145601962-145711968	lincRNA	3.27844	0.0596981	2.00484	0.0893084	0.9	-0.51	2.76186e-10	TRUE	FALSE	FALSE	FALSE	FALSE	FALSE	FALSE	FALSE	FALSE	FALSE	FALSE	FALSE
Gm26765	ENSMUSG00000097664.1	NA	chr10:91149514-91150594	lincRNA	12.2444	4.60806	11.5643	13.7873	-0.29	-1.23	2.0299e-13	TRUE	FALSE	FALSE	FALSE	FALSE	FALSE	FALSE	FALSE	FALSE	FALSE	FALSE	FALSE
Gm16853	ENSMUSG00000097665.1	NA	chr9:21405241-21411720	lincRNA	0.863926	0.192911	1.52276	0.806619	0.6	0.28	9.89756e-05	TRUE	FALSE	FALSE	FALSE	FALSE	FALSE	TRUE	TRUE	FALSE	FALSE	TRUE	FALSE
A330094K24Rik	ENSMUSG00000097666.1	NA	chr18:77729680-77733470	lincRNA	2.03024	0.00178221	0.863221	0	-0.89	NA	3.83229e-15	TRUE	FALSE	FALSE	FALSE	FALSE	FALSE	FALSE	FALSE	FALSE	FALSE	FALSE	FALSE
Gm26764	ENSMUSG00000097667.1	NA	chr12:87332487-87335655	lincRNA	0.276362	0.0897792	0.461569	0.471201	1.07	0.49	6.54772e-05	TRUE	FALSE	FALSE	FALSE	FALSE	FALSE	FALSE	FALSE	TRUE	TRUE	FALSE	FALSE
Gm26609	ENSMUSG00000097672.1	NA	chr9:62804477-62808234	lincRNA	0.901729	0.0641972	1.58628	0.191432	0.51	0.06	3.44243e-10	TRUE	FALSE	FALSE	FALSE	FALSE	FALSE	FALSE	FALSE	FALSE	FALSE	FALSE	FALSE
Gm26610	ENSMUSG00000097674.1	NA	chr7:30650384-30652711	lincRNA	0.160545	0.105274	0.0366146	0.172311	2.59	0.83	0.26381	FALSE	FALSE	FALSE	FALSE	FALSE	FALSE	TRUE	TRUE	TRUE	FALSE	TRUE	FALSE
Gm26643	ENSMUSG00000097681.1	NA	chr4:43030998-43032482	lincRNA	0.454505	0.369976	0.524525	0.44447	0.45	0.16	0.3154	FALSE	FALSE	FALSE	FALSE	FALSE	FALSE	TRUE	TRUE	TRUE	FALSE	TRUE	FALSE
Gm26646	ENSMUSG00000097685.1	NA	chr7:79916951-79920606	lincRNA	0.110393	0.0915316	0.2163	0.10448	-0.22	0.07	0.757535	FALSE	FALSE	FALSE	FALSE	FALSE	FALSE	FALSE	FALSE	FALSE	FALSE	FALSE	FALSE
Gm26906	ENSMUSG00000097698.1	NA	chr12:109568627-109571723	lincRNA	9.94922	0.014677	15.9173	2.14124	0.33	-0.25	NA	FALSE	FALSE	FALSE	FALSE	FALSE	FALSE	FALSE	FALSE	FALSE	FALSE	FALSE	FALSE
Gm26623	ENSMUSG00000097703.1	NA	chr12:83620209-83621174	lincRNA	157.706	106.466	142.055	86.123	-0.33	-0.07	0.00037804	TRUE	FALSE	FALSE	FALSE	FALSE	FALSE	FALSE	FALSE	FALSE	FALSE	FALSE	FALSE
Gm26742	ENSMUSG00000097707.1	NA	chr18:54981434-54987689	lincRNA	0.0539703	0.289144	0.180672	1.24886	0.59	0.43	0.000226743	TRUE	FALSE	FALSE	FALSE	FALSE	FALSE	FALSE	FALSE	TRUE	TRUE	FALSE	FALSE
2810429I04Rik	ENSMUSG00000097709.2	linc1460	chr13:3478229-3501393	lincRNA	4.49587	0.474174	0.522755	0.54192	0.81	-0.36	4.42023e-25	TRUE	FALSE	FALSE	FALSE	FALSE	TRUE	TRUE	FALSE	FALSE	FALSE	FALSE	FALSE
Gm10532	ENSMUSG00000097712.1	NA	chr18:75514644-75522806	lincRNA	0.192991	3.42976	0.220323	1.07505	0.42	-0.05	0.645636	FALSE	FALSE	FALSE	FALSE	FALSE	FALSE	FALSE	FALSE	FALSE	FALSE	FALSE	FALSE
Gm20109	ENSMUSG00000097714.1	NA	chr17:28522380-28523148	lincRNA	0.239768	0.35185	0.111754	0.0452024	-1.07	-0.06	0.274853	FALSE	FALSE	FALSE	FALSE	FALSE	FALSE	TRUE	TRUE	FALSE	FALSE	TRUE	FALSE
Gpr137b-ps	ENSMUSG00000097715.1	NA	chr13:12619083-12650297	lincRNA	4.62217	4.10185	2.95449	5.19885	-0.2	-0.22	0.277666	FALSE	FALSE	FALSE	FALSE	FALSE	FALSE	FALSE	FALSE	FALSE	FALSE	FALSE	FALSE
Gm26896	ENSMUSG00000097718.1	NA	chr10:81606367-81609791	lincRNA	0.451892	0.926385	0.503728	1.21366	1.01	-0.19	4.12129e-05	TRUE	FALSE	FALSE	FALSE	FALSE	FALSE	FALSE	FALSE	FALSE	FALSE	FALSE	FALSE
Gm26841	ENSMUSG00000097722.1	NA	chr2:152694732-152696692	lincRNA	0.35141	0.203642	0.423759	0.177121	0.64	0.53	0.148001	FALSE	FALSE	FALSE	FALSE	FALSE	FALSE	FALSE	FALSE	FALSE	FALSE	FALSE	FALSE
Gm26848	ENSMUSG00000097723.1	NA	chr17:6314198-6493180	lincRNA	3.47307	1.49087	2.42021	3.00485	0.82	0.66	2.65739e-05	TRUE	FALSE	FALSE	FALSE	FALSE	FALSE	FALSE	FALSE	FALSE	FALSE	FALSE	FALSE
Gm26850	ENSMUSG00000097724.1	NA	chr3:63963632-63968659	lincRNA	1.48634	2.66533	1.35141	2.77181	-0.21	-0.4	0.117208	FALSE	FALSE	FALSE	FALSE	FALSE	FALSE	TRUE	TRUE	TRUE	FALSE	TRUE	FALSE
F630040K05Rik	ENSMUSG00000097727.2	NA	chr17:45734505-45788594	lincRNA	1.09128	0.0568537	0.463038	0.0337454	-0.65	1.21	9.71591e-17	TRUE	FALSE	FALSE	FALSE	FALSE	FALSE	TRUE	TRUE	TRUE	FALSE	TRUE	FALSE
Gm26840	ENSMUSG00000097728.1	NA	chr4:155769968-155776161	lincRNA	0.178751	7.1434	0.689959	0.788655	0.41	0.1	1.51981e-18	TRUE	FALSE	FALSE	FALSE	FALSE	FALSE	TRUE	FALSE	FALSE	FALSE	TRUE	FALSE
2310015A10Rik	ENSMUSG00000097729.1	NA	chr12:80120547-80132844	lincRNA	1.27988	0.788145	1.25366	1.11543	0.66	0.35	0.067501	FALSE	FALSE	FALSE	FALSE	FALSE	FALSE	TRUE	FALSE	FALSE	FALSE	TRUE	FALSE
2700016F22Rik	ENSMUSG00000097731.1	NA	chr4:139376548-139380379	lincRNA	1.70699	4.21174	2.77946	3.27128	0.55	-0.05	0.00107094	TRUE	FALSE	FALSE	FALSE	FALSE	FALSE	TRUE	TRUE	FALSE	FALSE	TRUE	FALSE
B930082K07Rik	ENSMUSG00000097734.1	NA	chr9:60687718-60690397	lincRNA	0.0703235	0.292078	0.0699764	0.260607	-0.8	-0.12	1.82337e-06	TRUE	FALSE	FALSE	FALSE	FALSE	FALSE	TRUE	TRUE	TRUE	FALSE	TRUE	FALSE
Gm26530	ENSMUSG00000097737.1	NA	chr3:116488965-116493358	lincRNA	4.18219	1.86601	2.99935	2.16733	-0.51	0.17	2.45664e-10	TRUE	FALSE	FALSE	FALSE	FALSE	FALSE	FALSE	FALSE	FALSE	FALSE	FALSE	FALSE
E030044B06Rik	ENSMUSG00000097740.1	NA	chr19:40868385-40874071	lincRNA	0.571844	0.0470164	0.215456	0	0.14	Inf	4.60021e-08	TRUE	FALSE	FALSE	FALSE	TRUE	FALSE	FALSE	FALSE	FALSE	FALSE	FALSE	FALSE
Gm16973	ENSMUSG00000097743.1	NA	chr14:56696279-56701268	lincRNA	5.14551	0.561806	3.86758	2.65424	0.68	0.39	1.96417e-12	TRUE	FALSE	FALSE	FALSE	FALSE	FALSE	FALSE	FALSE	TRUE	FALSE	FALSE	FALSE
Gm6225	ENSMUSG00000097746.1	NA	chr18:3336415-3366863	lincRNA	0.261008	0.216973	0.22813	0.211418	0.6	0.04	0.620054	FALSE	FALSE	FALSE	FALSE	FALSE	FALSE	TRUE	TRUE	TRUE	FALSE	FALSE	FALSE
Gm26534	ENSMUSG00000097747.1	NA	chr11:60879117-60887218	lincRNA	0.199837	0.302455	0.782172	0.325685	0.39	0.83	0.0589474	FALSE	FALSE	FALSE	FALSE	FALSE	FALSE	TRUE	TRUE	FALSE	FALSE	TRUE	FALSE
Gm26533	ENSMUSG00000097748.1	NA	chr18:31781225-31789045	lincRNA	7.71936	13.7843	6.13933	13.6919	0.25	-0.1	0.446165	FALSE	FALSE	FALSE	FALSE	FALSE	FALSE	TRUE	TRUE	FALSE	FALSE	TRUE	FALSE
Gm16938	ENSMUSG00000097749.1	NA	chr7:98177193-98185597	lincRNA	0.149877	0.0641216	0.124945	0.110684	0.96	0.27	0.000290355	TRUE	FALSE	FALSE	FALSE	FALSE	FALSE	TRUE	TRUE	FALSE	FALSE	FALSE	FALSE
Gm26690	ENSMUSG00000097751.1	NA	chr7:127982569-127984881	lincRNA	0.186527	0.184911	0.600794	0.243372	0.46	-0.28	0.572296	FALSE	FALSE	FALSE	FALSE	FALSE	FALSE	FALSE	FALSE	FALSE	FALSE	FALSE	FALSE
2010110K18Rik	ENSMUSG00000097755.1	NA	chr18:34751808-34758685	lincRNA	0.757054	0.245653	0.46666	1.05108	0.36	-0.28	0.00513374	TRUE	FALSE	FALSE	FALSE	FALSE	FALSE	TRUE	TRUE	FALSE	FALSE	FALSE	FALSE
A730056A06Rik	ENSMUSG00000097756.1	NA	chr7:73314002-73375739	lincRNA	0.0127512	0.890689	0.0284096	1.57948	-1.01	-0.46	2.21137e-17	TRUE	FALSE	FALSE	FALSE	FALSE	FALSE	TRUE	TRUE	FALSE	FALSE	TRUE	TRUE
Gm17518	ENSMUSG00000097757.1	NA	chr16:90727511-90729120	lincRNA	0.184327	0.304811	0.290585	0.128957	0.01	-0.06	0.141923	FALSE	FALSE	FALSE	FALSE	FALSE	FALSE	TRUE	TRUE	FALSE	FALSE	FALSE	FALSE
6030442K20Rik	ENSMUSG00000097760.2	NA	chr1:132466432-132477064	lincRNA	1.95448	0.515942	0.551262	1.02335	1.18	0.02	1.52503e-17	TRUE	FALSE	FALSE	FALSE	FALSE	FALSE	TRUE	TRUE	FALSE	FALSE	TRUE	FALSE
4930534D22Rik	ENSMUSG00000097761.1	NA	chr3:131302642-131316661	lincRNA	0.116935	0.735056	0.111134	0.192857	-0.25	-0.62	0.160262	FALSE	FALSE	FALSE	FALSE	FALSE	FALSE	TRUE	TRUE	FALSE	FALSE	FALSE	FALSE
Gm26636	ENSMUSG00000097763.1	NA	chr6:87908842-87914459	lincRNA	1.54386	4.66419	3.47719	2.71738	-0.04	0.6	NA	FALSE	FALSE	FALSE	FALSE	FALSE	FALSE	TRUE	FALSE	TRUE	TRUE	FALSE	FALSE
Gm26635	ENSMUSG00000097764.1	NA	chr16:17254959-17260326	lincRNA	18.5099	1.93154	14.6628	1.85179	-0.3	0.38	NA	FALSE	FALSE	FALSE	FALSE	TRUE	FALSE	FALSE	FALSE	FALSE	FALSE	FALSE	FALSE
5730420D15Rik	ENSMUSG00000097766.1	NA	chr10:95417374-95428640	lincRNA	0.138873	0.00620949	0.136449	0	1.38	NA	0.00242365	TRUE	FALSE	FALSE	FALSE	FALSE	FALSE	TRUE	TRUE	TRUE	TRUE	TRUE	FALSE
Miat	ENSMUSG00000097767.3	NA	chr5:112213227-112229395	lincRNA	0.37654	3.36999	1.12198	6.89187	0.71	0.82	NA	FALSE	FALSE	FALSE	FALSE	FALSE	FALSE	FALSE	FALSE	FALSE	FALSE	FALSE	FALSE
2310043M15Rik	ENSMUSG00000097768.1	NA	chr16:93792149-93794888	lincRNA	8.34902	0.0755532	3.26554	0.472576	-0.04	0.22	1.20653e-65	TRUE	FALSE	FALSE	FALSE	FALSE	FALSE	FALSE	FALSE	FALSE	FALSE	FALSE	FALSE
Snhg4	ENSMUSG00000097769.2	NA	chr18:35553370-35558316	lincRNA	39.1538	4.49202	40.8474	10.4185	0.58	0.5	1.26035e-27	TRUE	FALSE	FALSE	TRUE	FALSE	FALSE	TRUE	TRUE	FALSE	FALSE	FALSE	FALSE
5430416N02Rik	ENSMUSG00000097772.2	linc1354	chr5:100420841-100429516	lincRNA	20.7712	3.8442	12.8474	7.63969	0.53	0.05	1.99633e-24	TRUE	FALSE	FALSE	FALSE	FALSE	FALSE	TRUE	TRUE	TRUE	FALSE	TRUE	FALSE
4833407H14Rik	ENSMUSG00000097779.1	linc1503	chr19:53460630-53462723	lincRNA	3.33252	0.0219836	1.14151	0.023377	0.11	-0.06	2.58803e-32	TRUE	FALSE	FALSE	FALSE	FALSE	FALSE	FALSE	FALSE	TRUE	TRUE	FALSE	FALSE
9330136K24Rik	ENSMUSG00000097781.1	NA	chr17:21528193-21535878	lincRNA	0.351557	0.142289	0.409817	0.221348	0.77	-0.03	0.195845	FALSE	FALSE	FALSE	FALSE	FALSE	FALSE	FALSE	FALSE	FALSE	FALSE	FALSE	FALSE
A430105J06Rik	ENSMUSG00000097784.1	NA	chr1:186749395-186752921	lincRNA	0.199321	0.304237	0.296539	0.486035	-1.08	0.58	0.131391	FALSE	FALSE	FALSE	FALSE	FALSE	FALSE	TRUE	TRUE	FALSE	FALSE	TRUE	FALSE
B230217O12Rik	ENSMUSG00000097785.1	NA	chr19:57323384-57360775	lincRNA	0.260059	0.579675	0.232663	0.0860089	-0.75	1.14	9.13259e-06	TRUE	FALSE	FALSE	FALSE	FALSE	FALSE	TRUE	TRUE	FALSE	FALSE	FALSE	FALSE
2700046G09Rik	ENSMUSG00000097787.1	NA	chr19:32389215-32391184	lincRNA	0.495481	1.47125	0.247544	0.405513	-0.02	0.62	1.85476e-09	TRUE	FALSE	FALSE	FALSE	FALSE	FALSE	TRUE	TRUE	TRUE	FALSE	TRUE	FALSE
Gm16596	ENSMUSG00000097788.1	NA	chr12:108536399-108555614	lincRNA	0.12046	0.602629	0.134637	1.58658	0.38	-0.17	0.000613094	TRUE	FALSE	FALSE	FALSE	FALSE	FALSE	TRUE	TRUE	FALSE	FALSE	TRUE	FALSE
Gm2115	ENSMUSG00000097789.1	NA	chr7:84528974-84578337	lincRNA	1.85439	6.09171	2.53153	1.63252	0.03	-0.23	1.90226e-05	TRUE	FALSE	FALSE	FALSE	FALSE	FALSE	FALSE	FALSE	FALSE	FALSE	FALSE	FALSE
Gm27042	ENSMUSG00000097792.1	NA	chr19:40589434-40594862	lincRNA	0.460036	0.853571	0.689739	1.41832	-0.07	0.29	0.0334178	FALSE	FALSE	FALSE	FALSE	FALSE	FALSE	TRUE	TRUE	FALSE	FALSE	TRUE	FALSE
Gm17259	ENSMUSG00000097793.1	NA	chr13:81778772-81783749	lincRNA	0.082374	0.143753	0.145915	0.18122	-0.06	-0.32	0.0344268	FALSE	FALSE	FALSE	FALSE	FALSE	FALSE	TRUE	TRUE	TRUE	FALSE	TRUE	FALSE
Gm26901	ENSMUSG00000097797.1	NA	chr1:7349405-7397801	lincRNA	0.235489	0.0694362	0.358696	0.190808	0.75	0.43	0.0949745	FALSE	FALSE	FALSE	FALSE	FALSE	FALSE	TRUE	TRUE	FALSE	FALSE	TRUE	FALSE
Gm26899	ENSMUSG00000097799.1	NA	chr2:120532903-120539846	lincRNA	37.213	10.234	31.443	15.4765	-0.92	-0.82	3.96657e-06	TRUE	FALSE	FALSE	FALSE	FALSE	FALSE	FALSE	FALSE	FALSE	FALSE	FALSE	FALSE
B230344G16Rik	ENSMUSG00000097800.1	NA	chr11:115988051-115993715	lincRNA	0.115986	0.0293572	0.244925	0.0354619	0.66	0.73	0.00971873	TRUE	FALSE	FALSE	FALSE	FALSE	FALSE	FALSE	FALSE	FALSE	FALSE	FALSE	FALSE
Gm26777	ENSMUSG00000097801.1	NA	chr12:80509950-80518916	lincRNA	0.0098564	0.122065	0.0167351	0.199039	1.52	0.04	5.28967e-06	TRUE	FALSE	FALSE	FALSE	FALSE	FALSE	TRUE	TRUE	FALSE	FALSE	FALSE	FALSE
Gm17473	ENSMUSG00000097805.1	NA	chr15:42676259-42704616	lincRNA	0.00808504	0.124509	0.0341314	0.383671	-4.76	0.21	NA	FALSE	FALSE	FALSE	FALSE	FALSE	FALSE	FALSE	TRUE	FALSE	TRUE	FALSE	FALSE
Gm26553	ENSMUSG00000097807.1	NA	chr3:96348626-96357094	lincRNA	0.177379	0	0.164987	0	0.39	NA	1.13703e-06	TRUE	FALSE	FALSE	FALSE	FALSE	FALSE	FALSE	FALSE	FALSE	FALSE	FALSE	FALSE
Gm26554	ENSMUSG00000097809.1	NA	chr7:29853084-29859025	lincRNA	0.123719	0.0357858	0.26506	0.140241	-0.17	1.21	NA	FALSE	FALSE	FALSE	FALSE	FALSE	FALSE	TRUE	TRUE	FALSE	FALSE	TRUE	FALSE
2810425M01Rik	ENSMUSG00000097811.1	NA	chr10:77486663-77516430	lincRNA	3.33623	6.16118	3.61062	3.57929	-0.01	-0.6	0.9972	FALSE	FALSE	FALSE	FALSE	FALSE	FALSE	FALSE	FALSE	FALSE	FALSE	FALSE	FALSE
Gm26810	ENSMUSG00000097817.1	NA	chr7:30198629-30200889	lincRNA	0.191316	0.0238618	0.353057	0.0460824	0.05	0.54	0.000295842	TRUE	FALSE	FALSE	FALSE	FALSE	FALSE	FALSE	FALSE	TRUE	TRUE	FALSE	FALSE
Gm26813	ENSMUSG00000097819.1	NA	chr1:59488479-59492605	lincRNA	0.277162	0.0941376	0.4501	0.222596	0.39	0.01	0.0188551	FALSE	FALSE	FALSE	FALSE	FALSE	FALSE	FALSE	FALSE	FALSE	FALSE	FALSE	TRUE
E530011L22Rik	ENSMUSG00000097820.1	NA	chr9:121757206-121759788	lincRNA	0.24498	1.17882	0.304943	0.628573	0.54	0.89	1.33571e-18	TRUE	FALSE	FALSE	FALSE	FALSE	FALSE	TRUE	TRUE	TRUE	FALSE	FALSE	FALSE
Gm16701	ENSMUSG00000097823.1	NA	chr1:166974023-167000841	lincRNA	0.0548422	0.310959	0.133558	0.661656	0.08	-0.02	0.000154181	TRUE	FALSE	FALSE	FALSE	FALSE	FALSE	TRUE	TRUE	TRUE	FALSE	FALSE	FALSE
5330439K02Rik	ENSMUSG00000097827.1	NA	chr15:100459739-100468691	lincRNA	0.018228	0.114839	0.0251303	0.170631	0.4	-0.39	0.000358133	TRUE	FALSE	FALSE	FALSE	FALSE	FALSE	TRUE	TRUE	FALSE	FALSE	FALSE	FALSE
6430562O15Rik	ENSMUSG00000097828.1	NA	chr13:99396923-99412864	lincRNA	0.431551	0.73128	1.12995	0.399031	0.4	0.94	0.0984396	FALSE	FALSE	FALSE	FALSE	FALSE	FALSE	FALSE	FALSE	FALSE	TRUE	FALSE	FALSE
4930540M05Rik	ENSMUSG00000097831.1	NA	chr6:119896158-119902653	lincRNA	0.0105139	0.149164	0.0184057	0.117936	0.93	-0.05	1.13038e-06	TRUE	FALSE	FALSE	FALSE	FALSE	FALSE	TRUE	TRUE	FALSE	FALSE	TRUE	FALSE
Gm26912	ENSMUSG00000097832.1	NA	chr12:110842275-110845216	lincRNA	0.14529	0.0815102	0.257804	0.0983925	-0.16	0.52	0.166661	FALSE	FALSE	FALSE	FALSE	FALSE	FALSE	TRUE	TRUE	FALSE	FALSE	TRUE	FALSE
Gm26910	ENSMUSG00000097835.1	NA	chr18:67773711-67774857	lincRNA	0.487411	0.741319	0.513723	0.848198	-0.87	-0.69	0.336355	FALSE	FALSE	FALSE	FALSE	FALSE	FALSE	TRUE	TRUE	TRUE	FALSE	TRUE	FALSE
Gm26909	ENSMUSG00000097839.1	NA	chr8:22644860-22646286	lincRNA	0.869622	0.386764	0.533066	0.878801	1.45	1.24	0.317351	FALSE	FALSE	FALSE	FALSE	FALSE	FALSE	FALSE	FALSE	FALSE	FALSE	FALSE	FALSE
9330104G04Rik	ENSMUSG00000097842.1	NA	chr7:16871353-16874886	lincRNA	0.609726	1.28217	0.151714	0.221573	0.85	0.41	3.27593e-07	TRUE	FALSE	FALSE	FALSE	FALSE	FALSE	TRUE	TRUE	FALSE	FALSE	TRUE	FALSE
Gm26755	ENSMUSG00000097843.1	NA	chr2:79453984-79461107	lincRNA	0.0606047	0.258543	1.20012	0.321665	-0.28	-0.32	NA	FALSE	FALSE	FALSE	FALSE	FALSE	FALSE	FALSE	FALSE	FALSE	FALSE	TRUE	FALSE
Gm807	ENSMUSG00000097848.1	linc1470	chr13:99100705-99107580	lincRNA	2.16102	4.81881	1.05124	0.826173	-0.84	-0.6	0.00462859	TRUE	FALSE	FALSE	FALSE	FALSE	FALSE	FALSE	TRUE	FALSE	TRUE	TRUE	TRUE
Gm17580	ENSMUSG00000097851.1	NA	chr3:96349926-96358480	lincRNA	1.8096	0.0167443	0.470426	0	0.31	NA	5.65977e-19	TRUE	FALSE	FALSE	FALSE	FALSE	FALSE	FALSE	FALSE	FALSE	FALSE	FALSE	FALSE
A930007I19Rik	ENSMUSG00000097855.2	NA	chr19:29486354-29523159	lincRNA	0.136941	0.198646	0.0982394	0.241551	1.34	0.44	0.140307	FALSE	FALSE	FALSE	FALSE	FALSE	FALSE	TRUE	TRUE	FALSE	FALSE	TRUE	FALSE
Gm26603	ENSMUSG00000097857.1	NA	chr2:52859722-52863516	lincRNA	0.123354	0.501056	0.563334	1.56192	0.08	0.34	5.33526e-06	TRUE	FALSE	FALSE	FALSE	FALSE	FALSE	FALSE	FALSE	FALSE	FALSE	FALSE	FALSE
9530052C20Rik	ENSMUSG00000097858.1	NA	chr3:142882494-142894644	lincRNA	0.124922	0.173791	0.198785	0.351901	-0.43	0.77	0.31879	FALSE	FALSE	FALSE	FALSE	FALSE	FALSE	TRUE	TRUE	FALSE	FALSE	TRUE	FALSE
Gm26857	ENSMUSG00000097860.1	NA	chr4:3678116-3689548	lincRNA	0.0351817	1.05717	0.0491953	0.681242	1.43	0.04	4.57621e-11	TRUE	FALSE	FALSE	FALSE	FALSE	TRUE	FALSE	FALSE	FALSE	FALSE	FALSE	FALSE
Gm26858	ENSMUSG00000097861.1	NA	chr17:32369304-32378445	lincRNA	0.438117	1.0051	0.671084	1.14016	-0.36	-0.03	NA	FALSE	FALSE	FALSE	FALSE	FALSE	FALSE	TRUE	FALSE	FALSE	FALSE	FALSE	FALSE
Gm26856	ENSMUSG00000097864.1	NA	chr7:49856161-49857600	lincRNA	1.97655	0.60606	2.87028	0.77199	-0.8	-0.6	5.40777e-06	TRUE	FALSE	FALSE	FALSE	FALSE	FALSE	FALSE	FALSE	TRUE	FALSE	FALSE	FALSE
1110054M08Rik	ENSMUSG00000097867.1	NA	chr16:24391611-24393588	lincRNA	0.246501	1.70132	0.30815	0.913102	-0.92	-0.43	2.27672e-29	TRUE	FALSE	FALSE	FALSE	FALSE	FALSE	TRUE	TRUE	FALSE	TRUE	FALSE	FALSE
A330069E16Rik	ENSMUSG00000097868.1	NA	chr2:91237145-91238352	lincRNA	0.666035	0.660332	0.211349	0.557509	1.16	-0.03	0.86408	FALSE	FALSE	FALSE	FALSE	FALSE	FALSE	TRUE	TRUE	TRUE	FALSE	TRUE	FALSE
Gm26868	ENSMUSG00000097870.1	NA	chr9:56606692-56614471	lincRNA	0.126426	0.048003	0.126556	0.0411618	-0.39	1.14	0.0228699	FALSE	FALSE	FALSE	FALSE	TRUE	FALSE	FALSE	FALSE	TRUE	FALSE	TRUE	TRUE
Gm26702	ENSMUSG00000097872.1	NA	chr2:25575430-25580099	lincRNA	0.0838669	0.321555	0.0984472	0.185883	0.13	0.06	NA	FALSE	FALSE	FALSE	FALSE	FALSE	FALSE	TRUE	TRUE	FALSE	FALSE	FALSE	FALSE
Gm26703	ENSMUSG00000097877.1	NA	chr5:104109216-104119687	lincRNA	0.101529	5.32843	0.033636	17.2652	0.6	0.08	NA	FALSE	FALSE	FALSE	FALSE	FALSE	FALSE	FALSE	TRUE	TRUE	TRUE	TRUE	FALSE
Celrr	ENSMUSG00000097881.2	NA	chr1:121087404-121178441	lincRNA	0.0450077	4.96259	0.107601	3.05567	-0.89	0.12	8.82127e-29	TRUE	FALSE	FALSE	FALSE	FALSE	FALSE	FALSE	TRUE	TRUE	TRUE	TRUE	TRUE
5031434O11Rik	ENSMUSG00000097885.2	NA	chr3:51559756-51567117	lincRNA	0.175534	0.181082	0.161915	0.243008	0.64	1.32	0.442507	FALSE	FALSE	FALSE	FALSE	FALSE	FALSE	TRUE	TRUE	TRUE	FALSE	TRUE	FALSE
Gm26542	ENSMUSG00000097887.1	NA	chr11:50237008-50288839	lincRNA	0.170314	0.0123262	0.263309	0.036838	0.84	0.52	6.58057e-14	TRUE	FALSE	FALSE	FALSE	FALSE	FALSE	TRUE	TRUE	FALSE	TRUE	TRUE	FALSE
Gm26682	ENSMUSG00000097888.1	NA	chr18:5162879-5165731	lincRNA	0.0288294	0.214724	0.0433698	0.264679	1.53	-0.8	2.25026e-05	TRUE	FALSE	FALSE	FALSE	TRUE	FALSE	FALSE	FALSE	FALSE	FALSE	FALSE	FALSE
Gm26541	ENSMUSG00000097889.1	NA	chr10:80681837-80687176	lincRNA	0.138973	0.280726	0.168541	0.299103	0.3	0.53	0.00402737	TRUE	FALSE	FALSE	FALSE	FALSE	FALSE	FALSE	FALSE	FALSE	FALSE	FALSE	FALSE
Gm26679	ENSMUSG00000097903.1	NA	chr14:120384262-120388985	lincRNA	0.45798	0.159147	0.690646	0.661526	0.31	0.37	0.918526	FALSE	FALSE	FALSE	FALSE	FALSE	FALSE	FALSE	FALSE	FALSE	FALSE	FALSE	FALSE
Gm26711	ENSMUSG00000097904.1	NA	chr5:110385834-110388073	lincRNA	0.491342	0.250361	0.61959	0.527166	0.92	0.83	0.0990035	FALSE	FALSE	FALSE	FALSE	FALSE	FALSE	TRUE	FALSE	FALSE	FALSE	FALSE	FALSE
4933404O12Rik	ENSMUSG00000097908.2	linc1543	chr5:136919145-136937112	lincRNA	1.94116	3.44099	7.48584	4.39005	-1.07	-0.67	2.2132e-05	TRUE	FALSE	FALSE	FALSE	FALSE	FALSE	TRUE	TRUE	FALSE	TRUE	TRUE	FALSE
6330403N20Rik	ENSMUSG00000097912.1	NA	chr7:80297727-80299616	lincRNA	0.440837	0.088452	0.317412	0.202154	1.37	1.22	1.26641e-05	TRUE	FALSE	FALSE	FALSE	FALSE	FALSE	FALSE	FALSE	FALSE	FALSE	FALSE	FALSE
Gm26837	ENSMUSG00000097913.1	NA	chr11:60573526-60633113	lincRNA	0.53712	0.335804	0.748582	0.284309	-0.02	-0.29	NA	FALSE	FALSE	FALSE	FALSE	FALSE	FALSE	FALSE	FALSE	FALSE	FALSE	FALSE	FALSE
Gm26838	ENSMUSG00000097914.1	NA	chr16:35805946-35808946	lincRNA	0.608907	0.0352996	0.587397	0.138863	0.9	-0.06	2.63349e-05	TRUE	FALSE	FALSE	FALSE	TRUE	FALSE	FALSE	FALSE	FALSE	FALSE	FALSE	FALSE
A330009N23Rik	ENSMUSG00000097915.1	NA	chr15:101221195-101224121	lincRNA	0.572005	0.244967	0.377088	0.544913	-1.09	-0.14	0.00176138	TRUE	FALSE	FALSE	FALSE	FALSE	FALSE	TRUE	TRUE	FALSE	FALSE	TRUE	FALSE
4930448N21Rik	ENSMUSG00000097922.1	NA	chr8:47294271-47446362	lincRNA	0.0290522	0.165569	0.0342121	0.412038	0.62	-0.33	0.00011394	TRUE	FALSE	FALSE	TRUE	FALSE	FALSE	FALSE	FALSE	FALSE	FALSE	FALSE	FALSE
A730020E08Rik	ENSMUSG00000097924.1	NA	chr6:61175612-61180810	lincRNA	0.0263644	0.190312	0	0.183771	Inf	-0.44	4.41888e-05	TRUE	FALSE	FALSE	FALSE	FALSE	FALSE	TRUE	TRUE	FALSE	FALSE	FALSE	FALSE
Gm26574	ENSMUSG00000097925.1	NA	chr1:189833140-189836620	lincRNA	0.225161	0.264637	0.574467	0.518736	0.38	0.43	0.664903	FALSE	FALSE	FALSE	FALSE	FALSE	FALSE	FALSE	FALSE	FALSE	FALSE	FALSE	FALSE
Tunar	ENSMUSG00000097929.2	NA	chr12:105336593-105383932	lincRNA	0.307861	0.0159958	0.600269	0.052982	-0.51	-0.12	3.79989e-13	TRUE	FALSE	FALSE	FALSE	FALSE	FALSE	TRUE	TRUE	FALSE	FALSE	FALSE	FALSE
C330002G04Rik	ENSMUSG00000097930.1	NA	chr19:23037389-23075853	lincRNA	1.09081	0.0201622	2.53646	0.0510448	0	-0.59	1.3531e-19	TRUE	FALSE	FALSE	FALSE	TRUE	FALSE	TRUE	FALSE	TRUE	TRUE	FALSE	FALSE
C430039J16Rik	ENSMUSG00000097932.1	NA	chr13:97283181-97285934	lincRNA	0.985461	0.0103614	0.22255	0	-0.1	NA	1.37114e-10	TRUE	FALSE	FALSE	FALSE	FALSE	FALSE	FALSE	FALSE	TRUE	TRUE	FALSE	FALSE
6720483E21Rik	ENSMUSG00000097934.1	NA	chr1:20888649-20890473	lincRNA	0.226284	0.163516	0.0822276	0.0959159	-0.3	-0.18	0.2835	FALSE	FALSE	FALSE	FALSE	FALSE	FALSE	TRUE	TRUE	FALSE	FALSE	TRUE	FALSE
Gm26917	ENSMUSG00000097971.2	NA	chr17:39845073-39846245	processed_transcript	142.734	103.137	252.722	66.3708	0.8	0.06	0.497858	FALSE	FALSE	FALSE	FALSE	FALSE	FALSE	FALSE	FALSE	FALSE	FALSE	FALSE	FALSE
Gm10605	ENSMUSG00000097974.1	NA	chr7:99625935-99631711	lincRNA	0.0583234	0.151231	0.0351719	0.488088	1.78	-0.26	0.733134	FALSE	FALSE	FALSE	FALSE	FALSE	FALSE	TRUE	TRUE	FALSE	FALSE	TRUE	FALSE
Gm26953	ENSMUSG00000097986.1	NA	chr5:112217059-112218474	lincRNA	0.123837	1.54328	0.423953	2.72326	0.98	0.37	NA	FALSE	FALSE	FALSE	FALSE	FALSE	FALSE	FALSE	FALSE	FALSE	FALSE	FALSE	FALSE
Ptprv	ENSMUSG00000097993.2	NA	chr1:135108496-135132594	processed_transcript	0.541347	3.18824	1.70572	15.8372	0.08	0.86	1.57391e-11	TRUE	FALSE	FALSE	FALSE	FALSE	FALSE	FALSE	FALSE	FALSE	FALSE	FALSE	FALSE
Gm27017	ENSMUSG00000097997.1	NA	chr14:61648949-61667312	lincRNA	0.137179	0.222592	0.0490029	0.455613	1.49	0.4	0.12279	FALSE	FALSE	FALSE	FALSE	FALSE	FALSE	TRUE	TRUE	FALSE	FALSE	TRUE	FALSE
Gm27019	ENSMUSG00000097998.1	NA	chr6:31063091-31063495	lincRNA	0.13594	0.0168996	0.371221	0	0.74	Inf	0.0844346	FALSE	TRUE	FALSE	FALSE	FALSE	FALSE	FALSE	FALSE	FALSE	FALSE	FALSE	FALSE
A930001A20Rik	ENSMUSG00000098008.1	NA	chr3:14971200-15002727	lincRNA	0.0261403	0.133144	0.0278106	0.236124	-2.29	-1.22	0.022222	FALSE	FALSE	FALSE	FALSE	FALSE	FALSE	FALSE	FALSE	FALSE	FALSE	FALSE	FALSE
Gm27012	ENSMUSG00000098020.1	NA	chr11:73088810-73089317	lincRNA	0.127142	0.420274	0.369757	0.410833	0.42	1.17	0.0103326	FALSE	FALSE	FALSE	FALSE	FALSE	FALSE	FALSE	FALSE	FALSE	FALSE	FALSE	TRUE
Gm26981	ENSMUSG00000098041.1	NA	chr7:92729839-92733748	lincRNA	0.47301	0.713895	0.442321	1.31437	1.36	0.77	0.42111	FALSE	FALSE	FALSE	FALSE	FALSE	FALSE	FALSE	FALSE	FALSE	FALSE	FALSE	FALSE
Gm26979	ENSMUSG00000098045.1	NA	chr1:137917689-137921312	lincRNA	0.00309266	0.55686	0	0.34495	NA	1.3	NA	FALSE	FALSE	FALSE	FALSE	FALSE	FALSE	FALSE	FALSE	FALSE	FALSE	FALSE	FALSE
Gm27032	ENSMUSG00000098051.1	NA	chr2:180894104-180895220	lincRNA	0.102284	0.41382	0.0671924	0.217749	0.93	0.72	2.5772e-05	TRUE	TRUE	FALSE	FALSE	FALSE	FALSE	TRUE	TRUE	TRUE	FALSE	TRUE	FALSE
Gm26944	ENSMUSG00000098066.1	NA	chr7:92639738-92647442	lincRNA	0.667906	0.361803	0.506141	0.905737	0.87	0.72	0.32936	FALSE	FALSE	FALSE	FALSE	FALSE	FALSE	FALSE	FALSE	FALSE	FALSE	FALSE	FALSE
Gm17750	ENSMUSG00000098087.1	NA	chr13:84025296-84064772	lincRNA	0	0.16485	0	0.141802	Inf	-3.22	0.0141428	FALSE	FALSE	FALSE	FALSE	FALSE	FALSE	FALSE	FALSE	FALSE	FALSE	FALSE	FALSE
Gm26916	ENSMUSG00000098088.1	NA	chr14:61629483-61630414	lincRNA	8.17918	0.286723	2.33578	2.8712	1.11	0.62	1.16992e-07	TRUE	FALSE	FALSE	FALSE	FALSE	FALSE	FALSE	FALSE	FALSE	FALSE	FALSE	FALSE
Gm20748	ENSMUSG00000098098.2	linc1500	chr18:61639541-61647472	lincRNA	8.51968	0.562318	8.37434	1.35237	-0.24	0.84	1.81631e-08	TRUE	FALSE	FALSE	FALSE	FALSE	FALSE	TRUE	FALSE	TRUE	TRUE	TRUE	FALSE
Gm5914	ENSMUSG00000098120.1	NA	chr8:105624335-105637485	lincRNA	1.06737	0.514904	1.27052	1.13935	0.72	0.29	0.00566068	TRUE	FALSE	FALSE	FALSE	FALSE	FALSE	TRUE	TRUE	TRUE	FALSE	TRUE	TRUE
Gm26936	ENSMUSG00000098145.1	NA	chr1:137928388-137969240	lincRNA	0.00573989	0.497385	0.00917785	0.658583	0.86	0.55	NA	FALSE	TRUE	FALSE	FALSE	FALSE	FALSE	FALSE	FALSE	FALSE	FALSE	FALSE	FALSE
Gm20204	ENSMUSG00000098148.1	NA	chr8:117210777-117215997	lincRNA	1.69275	2.14931	1.94649	3.99028	-0.05	-0.17	0.133958	FALSE	FALSE	FALSE	FALSE	FALSE	FALSE	FALSE	FALSE	FALSE	FALSE	FALSE	FALSE
Gm27022	ENSMUSG00000098155.1	NA	chr4:136347846-136349441	lincRNA	0.540891	0.181063	0.846255	1.45827	0.83	0.27	NA	FALSE	FALSE	FALSE	FALSE	FALSE	FALSE	FALSE	FALSE	FALSE	FALSE	FALSE	FALSE
Gm26975	ENSMUSG00000098161.1	linc1405	chr9:118404096-118406099	lincRNA	4.68547	0.0184499	1.45076	0	-0.39	NA	NA	FALSE	FALSE	FALSE	FALSE	TRUE	FALSE	TRUE	FALSE	TRUE	TRUE	FALSE	FALSE
Yam1	ENSMUSG00000098178.1	NA	chr17:39846957-39848788	lincRNA	2714.37	0	19107.1	10505.5	-0.78	-0.02	0.00291497	TRUE	FALSE	FALSE	FALSE	FALSE	FALSE	FALSE	FALSE	FALSE	FALSE	FALSE	FALSE
Gm26964	ENSMUSG00000098196.1	NA	chr11:61865474-61867639	lincRNA	0.75309	0.82195	1.4274	1.03818	0.82	0.68	NA	FALSE	FALSE	FALSE	FALSE	FALSE	FALSE	FALSE	FALSE	FALSE	FALSE	FALSE	FALSE
B830012L14Rik	ENSMUSG00000098202.1	NA	chr12:109695585-109702587	lincRNA	0.604306	0.00599741	1.75639	0.322956	0.57	0.07	NA	FALSE	FALSE	FALSE	FALSE	FALSE	FALSE	FALSE	FALSE	FALSE	FALSE	FALSE	FALSE
A430106G13Rik	ENSMUSG00000098206.1	NA	chr1:137966530-137969918	lincRNA	0.00411913	0.148952	0.00962774	0.59321	-1.03	0.3	3.82754e-11	TRUE	TRUE	FALSE	FALSE	FALSE	FALSE	FALSE	FALSE	FALSE	FALSE	FALSE	FALSE
Gm27031	ENSMUSG00000098220.1	NA	chr13:95954593-95957171	lincRNA	0.359631	0.140581	0.232697	1.17154	0.52	-0.19	0.0427895	FALSE	FALSE	FALSE	FALSE	FALSE	FALSE	FALSE	FALSE	FALSE	FALSE	FALSE	FALSE
Snhg6	ENSMUSG00000098234.2	NA	chr1:9941958-9944118	lincRNA	122.878	41.4155	31.9791	19.0597	0.26	0.29	3.60202e-06	TRUE	FALSE	FALSE	TRUE	TRUE	FALSE	TRUE	TRUE	FALSE	FALSE	FALSE	FALSE
Gm4258	ENSMUSG00000098243.3	NA	chr1:137898594-138000384	processed_transcript	0.0100528	1.21822	0.00152125	1.49867	4.42	-0.22	3.61729e-11	TRUE	TRUE	FALSE	FALSE	FALSE	FALSE	FALSE	TRUE	FALSE	FALSE	TRUE	TRUE
Gm27194	ENSMUSG00000098292.1	NA	chr11:62749851-62752787	lincRNA	2.31461	3.1619	1.44303	1.18241	-0.84	-1.84	0.0743281	FALSE	FALSE	FALSE	FALSE	FALSE	FALSE	FALSE	FALSE	FALSE	FALSE	FALSE	FALSE
Gm28039	ENSMUSG00000098302.1	NA	chr5:106557945-106696571	processed_transcript	0.565976	0.280405	0.547949	0.577241	-0.82	-1.35	NA	FALSE	FALSE	TRUE	FALSE	FALSE	FALSE	TRUE	TRUE	FALSE	FALSE	TRUE	FALSE
1190002F15Rik	ENSMUSG00000098318.2	linc1560	chr6:134929091-134951718	lincRNA	9.13265	21.596	4.60809	10.9536	-0.78	-0.64	0.00235022	TRUE	FALSE	FALSE	FALSE	FALSE	FALSE	TRUE	TRUE	TRUE	FALSE	TRUE	FALSE
5031420N21Rik	ENSMUSG00000098332.2	NA	chr9:73039717-73042779	processed_transcript	4.84927	13.0666	5.70286	6.65464	-0.4	-0.37	2.83012e-06	TRUE	FALSE	FALSE	FALSE	FALSE	FALSE	TRUE	TRUE	TRUE	FALSE	FALSE	FALSE
Gm28037	ENSMUSG00000098371.1	NA	chr16:55966342-55980721	processed_transcript	0.5021	0.177377	1.21749	0.736161	-0.83	2.1	NA	FALSE	FALSE	FALSE	FALSE	FALSE	FALSE	TRUE	TRUE	FALSE	FALSE	FALSE	TRUE
1810026B05Rik	ENSMUSG00000098496.2	NA	chr7:73539800-73558395	processed_transcript	1.31252	0.319399	0.874339	1.65451	0.95	0.19	5.82931e-06	TRUE	FALSE	FALSE	FALSE	FALSE	FALSE	TRUE	TRUE	FALSE	TRUE	TRUE	FALSE
1110015O18Rik	ENSMUSG00000098659.2	NA	chr3:4797557-4814911	lincRNA	0	0.425605	0	1.84825	NA	-0.84	8.41349e-07	TRUE	FALSE	FALSE	FALSE	FALSE	FALSE	FALSE	TRUE	FALSE	FALSE	FALSE	FALSE
Otx2os1	ENSMUSG00000098682.2	NA	chr14:48669287-48793348	lincRNA	5.46714	4.38935	3.09954	1.90897	-0.82	-0.88	0.0115274	FALSE	FALSE	TRUE	FALSE	FALSE	FALSE	FALSE	FALSE	FALSE	FALSE	FALSE	FALSE
Gm27244	ENSMUSG00000098800.1	NA	chr3:108708907-108712653	processed_transcript	0.180002	0.157472	0.170151	0.518459	-0.45	-0.14	NA	FALSE	FALSE	FALSE	FALSE	FALSE	FALSE	FALSE	FALSE	FALSE	FALSE	FALSE	FALSE
1500004A13Rik	ENSMUSG00000098912.2	NA	chr3:88782942-88832547	processed_transcript	2.37851	1.93909	4.17055	4.40703	0.26	-0.28	5.27657e-07	TRUE	FALSE	FALSE	FALSE	FALSE	FALSE	FALSE	FALSE	FALSE	FALSE	TRUE	FALSE
Gm28050	ENSMUSG00000099061.1	NA	chr5:106500893-106574718	lincRNA	0.707866	3.5615	0.168088	0.677374	0.55	-0.83	7.78061e-09	TRUE	FALSE	FALSE	FALSE	FALSE	FALSE	TRUE	TRUE	FALSE	FALSE	FALSE	FALSE
Gm19569	ENSMUSG00000099094.1	NA	chr9:77544958-77546467	processed_transcript	0.233096	1.68889	0.0888457	0.582373	0.93	-0.27	4.17995e-19	TRUE	FALSE	FALSE	FALSE	FALSE	FALSE	TRUE	TRUE	FALSE	FALSE	FALSE	FALSE
Gm10603	ENSMUSG00000099137.1	NA	chr7:100446736-100474846	lincRNA	0.280915	0.508814	0.504179	0.615022	0.29	0.25	0.248887	FALSE	FALSE	FALSE	FALSE	FALSE	FALSE	FALSE	FALSE	FALSE	FALSE	FALSE	FALSE
RP23-185G9.3	ENSMUSG00000099338.1	NA	chr8:13200719-13207714	lincRNA	0.726562	0.0915318	0.33401	0.0951348	-0.2	0.1	1.09827e-06	TRUE	FALSE	FALSE	FALSE	FALSE	FALSE	TRUE	FALSE	FALSE	FALSE	FALSE	FALSE
CAAA01152789.1	ENSMUSG00000099364.1	NA	chr1:78595030-78609508	lincRNA	1.06389	0.00139963	0.111058	0	0.4	NA	2.43486e-15	TRUE	FALSE	FALSE	FALSE	FALSE	FALSE	FALSE	FALSE	FALSE	FALSE	FALSE	FALSE
RP24-105B23.1	ENSMUSG00000099370.1	NA	chr3:75647445-75655731	lincRNA	23.7989	0.00166652	48.9301	0.0448576	-0.53	-0.09	2.04328e-35	TRUE	FALSE	FALSE	FALSE	TRUE	TRUE	TRUE	FALSE	FALSE	TRUE	FALSE	FALSE
RP24-162O23.1	ENSMUSG00000099384.1	NA	chr17:10324601-10329307	lincRNA	0.0408752	0.216842	0.0318685	0.840961	0.74	0.66	0.0497591	FALSE	FALSE	FALSE	FALSE	FALSE	FALSE	FALSE	FALSE	FALSE	FALSE	FALSE	FALSE
RP24-178B14.1	ENSMUSG00000099498.1	NA	chr1:13068837-13078662	lincRNA	0.179816	0.00538881	0.129748	0	0.02	Inf	NA	FALSE	FALSE	FALSE	FALSE	FALSE	FALSE	FALSE	FALSE	FALSE	FALSE	FALSE	FALSE
RP23-321N22.4	ENSMUSG00000099519.1	NA	chr1:75171730-75185146	processed_transcript	0.133948	0.168107	0.0664489	0.29232	3.12	-0.87	0.0326947	FALSE	FALSE	FALSE	FALSE	FALSE	FALSE	FALSE	FALSE	FALSE	FALSE	FALSE	FALSE
RP23-305F24.3	ENSMUSG00000099576.1	NA	chr1:43250155-43302925	lincRNA	0.171692	0.115	0.12647	0.0848643	-0.13	-2.54	NA	FALSE	FALSE	FALSE	FALSE	FALSE	FALSE	FALSE	FALSE	FALSE	FALSE	FALSE	FALSE
RP24-69I6.1	ENSMUSG00000099597.1	NA	chr12:99190077-99191484	lincRNA	12.7563	10.7589	7.27483	13.7677	0.61	0	0.537297	FALSE	FALSE	FALSE	FALSE	FALSE	FALSE	FALSE	FALSE	FALSE	FALSE	FALSE	FALSE
RP23-402K24.2	ENSMUSG00000099697.1	linc1565	chr7:39552495-39565319	lincRNA	5.09875	2.94168	3.84999	9.80501	-0.02	-0.15	0.159709	FALSE	FALSE	FALSE	FALSE	FALSE	FALSE	TRUE	TRUE	TRUE	FALSE	FALSE	FALSE
RP23-421G18.1	ENSMUSG00000099706.1	NA	chr1:78791622-79224511	lincRNA	0.069328	0.268149	0.124464	0.127507	-0.62	-0.53	NA	FALSE	TRUE	FALSE	FALSE	FALSE	FALSE	FALSE	FALSE	FALSE	FALSE	FALSE	FALSE
RP23-152O2.3	ENSMUSG00000099759.1	NA	chr12:20804380-20815779	processed_transcript	3.51962	0.275838	1.0897	0.0436285	0.59	1.68	0.006754	TRUE	FALSE	FALSE	FALSE	FALSE	FALSE	TRUE	FALSE	FALSE	FALSE	FALSE	FALSE
RP23-413D14.1	ENSMUSG00000099825.1	NA	chr8:22398720-22399596	lincRNA	0.0951377	0.189978	0.0428006	0.118888	1.52	-0.06	0.164916	FALSE	FALSE	FALSE	FALSE	FALSE	FALSE	TRUE	TRUE	FALSE	FALSE	FALSE	FALSE
RP24-79F8.3	ENSMUSG00000099843.1	NA	chr1:105979349-105990282	lincRNA	0.335189	0.78115	0.428315	0.520118	0.97	1.2	0.000750186	TRUE	FALSE	FALSE	FALSE	FALSE	FALSE	TRUE	TRUE	TRUE	TRUE	TRUE	FALSE
RP24-479J14.1	ENSMUSG00000099869.1	NA	chr6:117646692-117751769	lincRNA	0.61874	0.734978	0.447806	0.689174	-0.67	-0.74	NA	FALSE	FALSE	FALSE	FALSE	FALSE	FALSE	FALSE	FALSE	FALSE	FALSE	FALSE	FALSE
RP24-240G4.2	ENSMUSG00000100005.1	NA	chr7:70365158-70411146	processed_transcript	0.0175851	0.121309	0.00244586	1.63197	1.43	0.65	0.0118188	FALSE	FALSE	FALSE	FALSE	FALSE	FALSE	FALSE	TRUE	FALSE	FALSE	FALSE	FALSE
RP24-62C22.1	ENSMUSG00000100009.1	NA	chr1:98589516-98607384	lincRNA	0.0324833	0.158339	0.275563	1.03864	0.4	0.02	0.020508	FALSE	FALSE	FALSE	FALSE	TRUE	FALSE	FALSE	FALSE	FALSE	FALSE	FALSE	FALSE
RP23-272H13.2	ENSMUSG00000100037.1	NA	chr1:131962953-132014486	processed_transcript	0.19495	0.065191	0.395803	0.113406	-3.66	-0.67	NA	FALSE	FALSE	FALSE	FALSE	FALSE	FALSE	TRUE	TRUE	FALSE	FALSE	FALSE	FALSE
RP23-231M6.2	ENSMUSG00000100113.1	NA	chr10:111506574-111507662	lincRNA	4.47159	19.1511	6.65093	18.0278	-0.15	-0.36	NA	FALSE	FALSE	FALSE	FALSE	FALSE	FALSE	TRUE	TRUE	TRUE	FALSE	TRUE	TRUE
RP24-467O4.1	ENSMUSG00000100164.1	NA	chr6:86848398-86849440	lincRNA	1.69874	14.9338	1.58321	4.29778	0.45	-0.39	2.58874e-34	TRUE	FALSE	FALSE	FALSE	FALSE	FALSE	TRUE	TRUE	FALSE	FALSE	FALSE	FALSE
RP24-287C2.2	ENSMUSG00000100213.1	NA	chr1:46849528-46850479	lincRNA	0.921163	0.416013	0.660026	0.967752	-0.16	0.38	0.0573213	FALSE	FALSE	FALSE	FALSE	FALSE	FALSE	FALSE	FALSE	FALSE	FALSE	FALSE	TRUE
RP23-402K24.5	ENSMUSG00000100214.1	NA	chr7:39571671-39576231	lincRNA	0.207843	0.464037	0.320667	1.35512	0.46	0.26	NA	FALSE	FALSE	FALSE	FALSE	FALSE	FALSE	FALSE	FALSE	FALSE	FALSE	FALSE	FALSE
RP23-137I13.1	ENSMUSG00000100252.1	NA	chr3:17789920-17808970	lincRNA	0.00373793	0.352627	0.0715475	0.62819	0.72	-0.23	NA	FALSE	TRUE	TRUE	FALSE	FALSE	FALSE	TRUE	FALSE	FALSE	FALSE	FALSE	FALSE
RP24-144C10.1	ENSMUSG00000100301.1	NA	chr1:73618087-73864466	lincRNA	0.0203686	0.456834	0.0393257	0.283446	-1.14	0.1	1.39854e-10	TRUE	TRUE	FALSE	FALSE	TRUE	FALSE	FALSE	FALSE	FALSE	FALSE	TRUE	FALSE
RP23-402K24.6	ENSMUSG00000100370.1	linc1565	chr7:39566945-39570556	lincRNA	2.98999	2.11743	1.58861	6.00862	0.43	0.04	0.400043	FALSE	FALSE	FALSE	FALSE	FALSE	FALSE	FALSE	FALSE	FALSE	FALSE	FALSE	FALSE
RP24-496O18.3	ENSMUSG00000100454.1	NA	chr1:97024515-97025565	lincRNA	211.613	74.1661	143.559	88.334	-0.71	-1.07	8.22815e-11	TRUE	FALSE	FALSE	FALSE	FALSE	FALSE	FALSE	FALSE	FALSE	FALSE	FALSE	FALSE
RP24-202N2.2	ENSMUSG00000100475.1	NA	chr13:96133368-96134335	lincRNA	0.304511	0.0148057	0.116319	0	-0.65	NA	5.0637e-06	TRUE	FALSE	FALSE	FALSE	FALSE	FALSE	TRUE	TRUE	FALSE	FALSE	FALSE	FALSE
RP23-103C13.5	ENSMUSG00000100480.1	NA	chr1:43745783-43746282	lincRNA	0.161551	0.143495	0.150274	0.41742	0.52	-1.06	0.839303	FALSE	FALSE	FALSE	FALSE	FALSE	FALSE	FALSE	FALSE	FALSE	FALSE	FALSE	FALSE
RP23-132E8.2	ENSMUSG00000100493.1	NA	chr4:134741553-134743421	lincRNA	0.401887	0.161179	0.541927	0.761955	0.47	0.23	0.002301	TRUE	FALSE	FALSE	FALSE	FALSE	TRUE	FALSE	FALSE	FALSE	FALSE	FALSE	FALSE
RP23-261G3.2	ENSMUSG00000100550.1	linc1596	chr10:95336275-95363216	lincRNA	0.427074	0.00197799	1.31089	0.00128857	-0.66	-Inf	5.13368e-06	TRUE	FALSE	FALSE	FALSE	TRUE	FALSE	FALSE	FALSE	FALSE	FALSE	FALSE	TRUE
RP24-528H20.3	ENSMUSG00000100558.1	NA	chr10:119413443-119426864	lincRNA	0.0461559	0.130896	0.0474918	0.240559	1.27	0.19	NA	FALSE	FALSE	FALSE	FALSE	TRUE	FALSE	FALSE	FALSE	FALSE	FALSE	FALSE	FALSE
RP23-370J16.1	ENSMUSG00000100594.1	NA	chr1:151748948-151755018	lincRNA	0.277814	2.07702	0.4928	0.530719	0.08	-1.43	1.28085e-08	TRUE	FALSE	FALSE	FALSE	FALSE	FALSE	TRUE	TRUE	FALSE	FALSE	TRUE	FALSE
RP23-34E23.1	ENSMUSG00000100599.1	NA	chr15:99251787-99262044	processed_transcript	0.349268	0.338954	0.338569	0.224214	0.02	0.23	0.676374	FALSE	FALSE	FALSE	TRUE	FALSE	FALSE	TRUE	TRUE	FALSE	FALSE	TRUE	FALSE
RP23-99B10.1	ENSMUSG00000100605.1	NA	chr8:34216858-34226145	lincRNA	0.367225	0.00133401	0.644028	0	-1.67	NA	0.000522566	TRUE	FALSE	FALSE	FALSE	TRUE	FALSE	FALSE	FALSE	TRUE	TRUE	FALSE	FALSE
RP23-188J8.3	ENSMUSG00000100618.1	NA	chr19:45300453-45311011	lincRNA	0.03949	0.188795	0.108049	0.325084	-0.07	-1.72	0.0678758	FALSE	FALSE	FALSE	FALSE	FALSE	FALSE	FALSE	TRUE	FALSE	FALSE	FALSE	FALSE
RP23-190H11.5	ENSMUSG00000100680.1	NA	chr6:91440986-91441755	lincRNA	1.28614	3.38606	2.18694	1.38577	-0.22	-0.73	1.50128e-08	TRUE	FALSE	FALSE	FALSE	FALSE	FALSE	TRUE	TRUE	FALSE	FALSE	FALSE	FALSE
RP23-410L16.1	ENSMUSG00000100691.1	NA	chr8:70776814-70777823	lincRNA	4.86861	13.9186	4.97929	5.64255	-0.22	-0.16	1.17112e-06	TRUE	FALSE	FALSE	FALSE	FALSE	FALSE	TRUE	TRUE	FALSE	FALSE	TRUE	FALSE
RP23-21N15.3	ENSMUSG00000100760.1	NA	chr13:37421832-37435149	lincRNA	0.408144	0.00146003	0.11937	0	0.84	NA	2.37931e-05	TRUE	FALSE	FALSE	FALSE	FALSE	FALSE	FALSE	FALSE	TRUE	TRUE	TRUE	FALSE
RP23-269P7.1	ENSMUSG00000100807.1	NA	chr9:101770371-101862489	processed_transcript	0.000273731	0.132358	0	0.201861	NA	-0.62	3.24088e-07	TRUE	FALSE	FALSE	FALSE	FALSE	FALSE	FALSE	FALSE	FALSE	FALSE	TRUE	FALSE
RP24-439I22.1	ENSMUSG00000100826.1	linc1385	chr7:59307923-59975759	processed_transcript	26.4409	5.78915	28.0184	15.7113	0.81	0.39	0.00033701	TRUE	FALSE	FALSE	TRUE	FALSE	FALSE	FALSE	FALSE	FALSE	FALSE	FALSE	FALSE
RP23-392G15.1	ENSMUSG00000100891.1	NA	chr13:83891207-83928710	lincRNA	0.00534911	0.168155	0	0.257774	NA	-0.2	0.000263108	TRUE	FALSE	FALSE	FALSE	FALSE	TRUE	FALSE	FALSE	FALSE	FALSE	FALSE	FALSE
RP24-159O13.1	ENSMUSG00000100975.1	NA	chr12:104925500-104926142	lincRNA	0.441077	0	0.584008	0.270369	1.07	-0.38	2.66422e-06	TRUE	FALSE	FALSE	FALSE	FALSE	FALSE	FALSE	FALSE	FALSE	FALSE	FALSE	FALSE
RP23-421C24.1	ENSMUSG00000101009.1	NA	chr14:76672962-76687169	processed_transcript	1.04384	0.084518	9.403	0.177529	0.9	-4.24	8.90641e-15	TRUE	FALSE	FALSE	FALSE	FALSE	FALSE	FALSE	FALSE	TRUE	TRUE	TRUE	FALSE
RP24-547I3.1	ENSMUSG00000101061.1	NA	chr1:134435627-134439597	lincRNA	0.443284	0.0145078	0.340012	0.0209377	0.68	1.27	5.99585e-17	TRUE	FALSE	FALSE	FALSE	FALSE	FALSE	FALSE	FALSE	TRUE	FALSE	FALSE	FALSE
RP24-343K18.1	ENSMUSG00000101104.1	NA	chr1:44091462-44110790	processed_transcript	0.317907	0.0665922	0.373881	0.292832	0.75	0.64	0.027223	FALSE	FALSE	FALSE	FALSE	FALSE	FALSE	FALSE	FALSE	FALSE	FALSE	FALSE	FALSE
RP23-13G1.4	ENSMUSG00000101144.1	NA	chr9:83145945-83147281	processed_transcript	0.0228477	0.603602	0.12656	0.834273	-2.07	-1.13	0.00550272	TRUE	FALSE	FALSE	FALSE	FALSE	FALSE	FALSE	TRUE	FALSE	FALSE	FALSE	FALSE
RP23-312I2.1	ENSMUSG00000101166.1	NA	chr7:44246725-44262720	processed_transcript	0.0670958	0.111219	0.15928	0.261121	-0.04	-0.17	0.536546	FALSE	FALSE	FALSE	TRUE	FALSE	FALSE	TRUE	TRUE	TRUE	FALSE	TRUE	FALSE
RP23-400A19.3	ENSMUSG00000101179.1	NA	chr1:119329199-119385581	lincRNA	0.0278283	0.849646	0.03113	0.206714	-0.07	-2.95	9.29337e-16	TRUE	FALSE	FALSE	FALSE	FALSE	FALSE	FALSE	FALSE	FALSE	TRUE	TRUE	FALSE
RP23-262M12.1	ENSMUSG00000101344.1	NA	chr1:73750320-73841917	lincRNA	0.0234067	0.144267	0.00211956	0.276622	1.76	0.01	0.0184131	FALSE	FALSE	FALSE	FALSE	TRUE	FALSE	FALSE	FALSE	FALSE	FALSE	FALSE	FALSE
RP23-401G21.7	ENSMUSG00000101365.1	NA	chr9:97047443-97067307	lincRNA	0.186464	0.109681	0.20053	0.230173	0.94	-0.22	0.187274	FALSE	FALSE	FALSE	FALSE	FALSE	FALSE	FALSE	FALSE	TRUE	TRUE	FALSE	TRUE
RP23-246F18.8	ENSMUSG00000101493.1	NA	chr4:137387265-137388382	lincRNA	0.434438	0.247532	0.503492	0.621583	0.61	0.08	0.0423865	FALSE	FALSE	FALSE	FALSE	FALSE	FALSE	TRUE	TRUE	FALSE	FALSE	TRUE	FALSE
RP23-464D14.3	ENSMUSG00000101556.1	NA	chr17:15061068-15074993	processed_transcript	0.732348	4.36779	1.08614	1.60671	0.53	0.69	2.42589e-06	TRUE	FALSE	FALSE	FALSE	FALSE	FALSE	FALSE	FALSE	FALSE	FALSE	FALSE	FALSE
RP24-272D15.1	ENSMUSG00000101585.1	NA	chr7:109998375-110151202	lincRNA	1.05969	0.275188	0.743846	0.428631	0.19	-0.31	0.354255	FALSE	FALSE	TRUE	TRUE	TRUE	FALSE	FALSE	FALSE	FALSE	TRUE	FALSE	FALSE
RP23-13C17.6	ENSMUSG00000101599.1	NA	chr1:63117117-63126837	lincRNA	1.25925	0.299575	1.2651	1.3734	0.75	0.54	1.70239e-06	TRUE	FALSE	FALSE	FALSE	FALSE	FALSE	FALSE	FALSE	TRUE	TRUE	FALSE	FALSE
RP24-194N4.4	ENSMUSG00000101628.1	NA	chr1:52077260-52156087	processed_transcript	3.33118	1.39866	2.31132	0.970551	-0.92	-1.21	NA	FALSE	FALSE	FALSE	FALSE	FALSE	TRUE	FALSE	FALSE	FALSE	FALSE	FALSE	FALSE
RP23-281H4.5	ENSMUSG00000101655.1	linc1366	chr6:86483375-86488227	lincRNA	1.42504	3.094	1.53359	1.09123	-1	-0.42	0.013799	FALSE	FALSE	FALSE	FALSE	FALSE	FALSE	FALSE	TRUE	FALSE	FALSE	TRUE	FALSE
RP23-386K20.4	ENSMUSG00000101731.1	NA	chr1:119529479-119536165	lincRNA	0.184952	0.189606	0.0953316	0.267076	1.24	0.04	0.885474	FALSE	FALSE	TRUE	FALSE	TRUE	TRUE	FALSE	FALSE	FALSE	FALSE	TRUE	FALSE
RP24-323H7.3	ENSMUSG00000101792.1	NA	chr10:61585392-61611074	processed_transcript	0.0186865	0.111308	0.0168132	0.117768	-2.59	-0.96	0.00709439	TRUE	FALSE	FALSE	FALSE	FALSE	FALSE	FALSE	FALSE	FALSE	FALSE	FALSE	FALSE
RP24-128L10.1	ENSMUSG00000101848.1	NA	chr1:71958997-72005195	lincRNA	0.158266	0.0745673	0.117691	0.0718092	-1.69	-1.62	NA	FALSE	FALSE	FALSE	FALSE	FALSE	FALSE	FALSE	FALSE	TRUE	TRUE	FALSE	FALSE
RP23-405O11.1	ENSMUSG00000101856.1	NA	chr5:25530012-25531466	lincRNA	1.33735	1.86542	0.825163	0.787902	-0.16	-0.15	0.0147605	FALSE	FALSE	FALSE	FALSE	FALSE	FALSE	FALSE	TRUE	FALSE	FALSE	TRUE	FALSE
RP23-75E19.2	ENSMUSG00000101859.1	NA	chr2:118123450-118124047	lincRNA	0.909129	0	0.509327	0.174449	0.97	1.36	NA	FALSE	FALSE	FALSE	FALSE	FALSE	FALSE	FALSE	FALSE	FALSE	FALSE	FALSE	FALSE
RP23-32A8.1	ENSMUSG00000101970.1	NA	chr7:73544035-73558386	processed_transcript	10.8425	5.47478	4.90401	9.57529	0.4	0.02	3.98096e-06	TRUE	FALSE	FALSE	FALSE	FALSE	FALSE	TRUE	TRUE	FALSE	TRUE	TRUE	FALSE
RP23-205B8.2	ENSMUSG00000102009.1	NA	chr1:89650528-89683908	processed_transcript	0.147616	0.419704	0.416935	1.12726	0.68	-0.26	0.000231165	TRUE	FALSE	FALSE	FALSE	FALSE	FALSE	FALSE	FALSE	FALSE	FALSE	FALSE	FALSE
RP23-262K24.1	ENSMUSG00000102106.1	NA	chr15:38549343-38594934	lincRNA	0.21107	0.105646	0.1102	0.121071	-0.46	-0.45	NA	FALSE	FALSE	FALSE	FALSE	FALSE	FALSE	FALSE	FALSE	FALSE	FALSE	FALSE	FALSE
