# Supplementary material for: Regulation of the ESC transcriptome by nuclear long noncoding RNAs
Source: HighWire-hosted journal article supplement (doi:10.1101/gr.189027.114), 2015-06-05
Supplement: Supp3_ValidationQpcrPrimers.xlsx [file Supp3_ValidationQpcrPrimers.xlsx]

## Sheet: ValidationQpcrPrimers
Gene short name	Gencode ID	primer_F (5' -> 3')	primer_R (5' -> 3')
6330403K07Rik	ENSMUSG00000018451.6	CGAGCCAGGGTGCTGATTCT	TGCTGCTTGCACCCGTACAT
Pabpc1	ENSMUSG00000022283.9	GCCGGGCTGAACTTCTCGTA	CGCACTCGCTCTCCTCCTCT
Ppib	ENSMUSG00000032383.6	GACAGACAGCCGGGACAAGC	GGGGATTGACAGGACCCACA
Lincenc1	ENSMUSG00000078952.4	TGCTTCAGGGTTCCATGCTG	TTGCAGATTGGCAGGCCTTT
Gm14074	ENSMUSG00000084762.1	CTTTCAGCACCCTGGGAATTG	AGGATCCCCGTTGCTCTCTG
Firre	ENSMUSG00000085396.2	GCCAACCACGCCAAACAGAT	GAGCCGTGGCTGGTGACTTT
2410003L11Rik	ENSMUSG00000085860.1	TTGTCTCCTTGATGGCTGCTGT	ATTCCGGAGGGCAGCAGAGT
4930500J02Rik	ENSMUSG00000086454.2	TCCGAAGATTAACGGCAGGA	TGGTCTCTTCAAGCTGGTCTTTTTC
Gm14136	ENSMUSG00000086563.1	GGGGCGAGTCAAAGGGAATC	CTCACAGGGTTGGCGGAGTT
5133400J02Rik	ENSMUSG00000086646.2	TCCGTGATGGTGCTGAATCC	CCTCGTGACTCCCTCCACGTA
2810468N07Rik	ENSMUSG00000091475.2	TCCAACATCCCTCCCTCCAA	GGGTCACCTGGTGGCTCTTG
Neat1	ENSMUSG00000092274.2	TGGTGCTGGTTTTGCAGCTC	GAGTGGCGGTTGTCCTTGCT
Malat1	ENSMUSG00000092341.2	GCCTGCACTCCACGTTCTGA	TGAAGTTGAGAAGAATCCCAGATGA
BC033916	ENSMUSG00000092349.1	GCGGGATCGTCACACCCTTA	AGGAACACGTCCCCCTCCTC
Eldr	ENSMUSG00000087060.2	GCTTTGAGACGGCCGAGAGT	GGAGCACCTAGTCAGGTTGCAGA
Gm11974	ENSMUSG00000085156.2	CACACGTGAGCGTCCTCAGC	CCACCGAGCTCAGCCATCTC
2810008D09Rik	ENSMUSG00000086859.3	ATGAACCACATCCCCCAACG	TGGGCCAACCAAGCTCAAGT
9430008C03Rik	ENSMUSG00000085385.2	CGGAAGCGTTTTCCTCTCCA	GTACCGTCGCTCCTGGCACT
1600020E01Rik	ENSMUSG00000097048.2	GCCTGCACTCCACGTTCTGA	TGAAGTTGAGAAGAATCCCAGATGA
C430002E04Rik	ENSMUSG00000097639.1	TGGTGCTGGTTTTGCAGCTC	GAGTGGCGGTTGTCCTTGCT
A830082K12Rik	ENSMUSG00000087143.4	GCAGATTGCTGCAGATGGTTTC	AGGTCCTCAGTTAGAGCAAGCAGA
2010204K13Rik	ENSMUSG00000063018.6	GAGGGGGAAAGGGCGTATTG	TGCTGATTGTTGCGGTTGCT
1810058I24Rik	ENSMUSG00000073155.7	TCCTTCACAGCCACGTCCAA	GCGGTAGGAATCCCAGAGCA
5430416N02Rik	ENSMUSG00000097772.2	GCCACCTCCCATCTTCAGAAA	GGGGCACAGGAGCTCTCGAT
2410004N09Rik	ENSMUSG00000087590.2	TGGCGTGGGATCTAGGGTGT	CGCTTTATTCCCGCCCAGTT
1700020I14Rik	ENSMUSG00000085438.1	GGAAAGCCGTGAGGATGCAG	TCACGCCACAGAACCTAAGCA
Gm26853	ENSMUSG00000097230.1	CCCATCCAGACTTGACCCTGA	CATGCACGAAGTGGCAATGA
1500011K16Rik	ENSMUSG00000051319.6	GAGTGAGAACCCGGCGGACT	TTCGCCTCTGGAGTGGTCCT
2210013O21Rik	ENSMUSG00000086316.2	CATTTCCTTGGTGCGTTTGTAAAAT	GCATCACAACTTCCAGGAGCAA
AI480526	ENSMUSG00000090086.2	AGTGGGGGAAGGCTCTCAGTC	GGAGACCGGAGCCATGTCTGT
2500002B13Rik	ENSMUSG00000096917.1	GCAGCTGGCTCCACCTCAGT	GCTGCCACTTGGGAAGAGGT
4930461G14Rik	ENSMUSG00000097651.1	GATCGCATCACGAAGCCTGA	CGGGGGAGATGCAACCATTA
Gm16880	ENSMUSG00000097448.1	AGCAGCTGGCTCCTGTGGTC	CGAGGGTGTGAGGATTCGTG
Six3os1	ENSMUSG00000093460.4	CAGAGCCTTGCTTGGGGAGA	GGGGCTCTGCAGTTCTCTGG
2610316D01Rik	ENSMUSG00000097040.1	CATTCTGATTTTTATTCCAGGTGTGTC	CCCATAATTCTCTAAGATTTGGAGCTG
4933404O12Rik	ENSMUSG00000097908.2	GCCTTGGCAGCTGTCTGAAA	GCTGGGTCCCTCTCATGTCC
D930016D06Rik	ENSMUSG00000097392.1	CACAATTGCTGCCCTGCCTA	CCACCACAGAGCTGCCTCAG
1300002E11Rik	ENSMUSG00000097290.2	GCAGAACCCTGCTACCTACAGACTC	TCTGAATGCCACAACACAAACTGA
Pvt1	ENSMUSG00000097039.3	CCGTGTCTGCTGGGACCTCT	AGTGGGCATCCAGGCTGAAG
