# Supplementary material for: Regulation of the ESC transcriptome by nuclear long noncoding RNAs
Source: HighWire-hosted journal article supplement (doi:10.1101/gr.189027.114), 2015-06-05
Supplement: Supp4_Pou5f1FullCoexpressionModule.xlsx [file Supp4_Pou5f1FullCoexpressionModule.xlsx]

## Sheet: Pou5f1_Full_Module
Gene short name	Gencode ID	Gene biotype	Intra-Module connections	Module correlation
Klf6	ENSMUSG00000000078.6	protein_coding	24	0.597
Hk2	ENSMUSG00000000628.5	protein_coding	31	0.607
Kat2b	ENSMUSG00000000708.9	protein_coding	64	0.664
Dnmt3l	ENSMUSG00000000730.8	protein_coding	97	0.895
Aire	ENSMUSG00000000731.10	protein_coding	45	0.725
Hoxc13	ENSMUSG00000001655.6	protein_coding	126	0.969
Tmem39a	ENSMUSG00000002845.9	protein_coding	17	0.541
Plag1	ENSMUSG00000003282.4	protein_coding	61	0.803
Fosb	ENSMUSG00000003545.2	protein_coding	88	0.836
Nqo1	ENSMUSG00000003849.8	protein_coding	11	0.431
Hspb1	ENSMUSG00000004951.10	protein_coding	32	0.595
Trh	ENSMUSG00000005892.4	protein_coding	82	0.856
Calcoco2	ENSMUSG00000006056.8	protein_coding	144	0.992
Rhox6	ENSMUSG00000006200.3	protein_coding	120	0.951
Epha2	ENSMUSG00000006445.3	protein_coding	17	0.57
Pdk1	ENSMUSG00000006494.6	protein_coding	56	0.702
Nphs1	ENSMUSG00000006649.11	protein_coding	60	0.698
2310003L06Rik	ENSMUSG00000007457.3	protein_coding	80	0.774
Zfp655	ENSMUSG00000007812.11	protein_coding	81	0.816
Gnat2	ENSMUSG00000009108.10	protein_coding	31	0.585
Tex11	ENSMUSG00000009670.6	protein_coding	103	0.895
Rdm1	ENSMUSG00000010362.4	protein_coding	17	0.577
Tnfrsf22	ENSMUSG00000010751.9	protein_coding	9	0.457
Wnt8a	ENSMUSG00000012282.2	protein_coding	143	0.992
Nanog	ENSMUSG00000012396.7	protein_coding	144	0.993
Timm23	ENSMUSG00000013701.7	protein_coding	76	0.819
Trnt1	ENSMUSG00000013736.11	protein_coding	60	0.77
Ly6g6e	ENSMUSG00000013766.6	protein_coding	21	0.517
Pigl	ENSMUSG00000014245.8	protein_coding	62	0.783
Fxr2	ENSMUSG00000018765.5	protein_coding	27	0.654
Smyd4	ENSMUSG00000018809.2	protein_coding	32	0.693
Avpi1	ENSMUSG00000018821.3	protein_coding	6	0.343
Rad51d	ENSMUSG00000018841.12	protein_coding	7	0.445
Utrn	ENSMUSG00000019820.9	protein_coding	8	0.451
Arid5b	ENSMUSG00000019947.9	protein_coding	42	0.647
Sgk1	ENSMUSG00000019970.10	protein_coding	26	0.614
Enpp3	ENSMUSG00000019989.7	protein_coding	34	0.607
Pald1	ENSMUSG00000020092.8	protein_coding	10	0.454
Mdm2	ENSMUSG00000020184.9	protein_coding	34	0.648
Pfkl	ENSMUSG00000020277.9	protein_coding	15	0.48
Stc2	ENSMUSG00000020303.2	protein_coding	8	0.444
Gfpt2	ENSMUSG00000020363.6	protein_coding	19	0.564
Upp1	ENSMUSG00000020407.8	protein_coding	34	0.68
Gatsl3	ENSMUSG00000020424.3	protein_coding	11	0.542
Twistnb	ENSMUSG00000020561.7	protein_coding	49	0.792
Nampt	ENSMUSG00000020572.7	protein_coding	61	0.702
Matn3	ENSMUSG00000020583.4	protein_coding	39	0.71
Klf11	ENSMUSG00000020653.6	protein_coding	11	0.468
Lsm12	ENSMUSG00000020922.6	protein_coding	38	0.696
1110008L16Rik	ENSMUSG00000021023.9	protein_coding	50	0.783
Esrrb	ENSMUSG00000021255.12	protein_coding	84	0.853
Gcnt2	ENSMUSG00000021360.10	protein_coding	38	0.617
Serpinb9b	ENSMUSG00000021403.2	protein_coding	97	0.903
Rpp40	ENSMUSG00000021418.10	protein_coding	57	0.804
Tert	ENSMUSG00000021611.8	protein_coding	10	0.361
Emb	ENSMUSG00000021728.7	protein_coding	27	0.587
Kat6b	ENSMUSG00000021767.11	protein_coding	39	0.721
Tdh	ENSMUSG00000021953.9	protein_coding	128	0.952
Tnfrsf10b	ENSMUSG00000022074.5	protein_coding	18	0.575
Fgf17	ENSMUSG00000022101.5	protein_coding	112	0.941
Gzme	ENSMUSG00000022156.7	protein_coding	77	0.782
Ajuba	ENSMUSG00000022178.10	protein_coding	16	0.562
Tgm1	ENSMUSG00000022218.10	protein_coding	14	0.45
Myo10	ENSMUSG00000022272.12	protein_coding	16	0.547
L3mbtl2	ENSMUSG00000022394.9	protein_coding	68	0.827
Dmc1	ENSMUSG00000022429.10	protein_coding	67	0.822
Morc1	ENSMUSG00000022652.6	protein_coding	142	0.988
Prkdc	ENSMUSG00000022672.8	protein_coding	77	0.855
Top3b	ENSMUSG00000022779.9	protein_coding	28	0.634
Setd4	ENSMUSG00000022948.9	protein_coding	18	0.5
Lnpep	ENSMUSG00000023845.6	protein_coding	17	0.493
Zscan10	ENSMUSG00000023902.13	protein_coding	117	0.929
Cldn6	ENSMUSG00000023906.2	protein_coding	93	0.89
Dusp1	ENSMUSG00000024190.6	protein_coding	11	0.478
Thada	ENSMUSG00000024251.9	protein_coding	37	0.719
Epb4.1l4a	ENSMUSG00000024376.6	protein_coding	23	0.636
Pou5f1	ENSMUSG00000024406.11	protein_coding	135	0.977
Spry4	ENSMUSG00000024427.6	protein_coding	8	0.369
H2-M5	ENSMUSG00000024459.13	protein_coding	49	0.781
Dtwd2	ENSMUSG00000024505.10	protein_coding	53	0.801
Pmaip1	ENSMUSG00000024521.7	protein_coding	67	0.808
Pga5	ENSMUSG00000024738.5	protein_coding	93	0.899
Tjp2	ENSMUSG00000024812.9	protein_coding	25	0.573
Nr0b1	ENSMUSG00000025056.4	protein_coding	61	0.755
Wdr45b	ENSMUSG00000025173.8	protein_coding	26	0.639
Fgf8	ENSMUSG00000025219.8	protein_coding	59	0.742
Huwe1	ENSMUSG00000025261.12	protein_coding	14	0.519
Acot9	ENSMUSG00000025287.10	protein_coding	41	0.598
Gpr143	ENSMUSG00000025333.5	protein_coding	54	0.642
Il23a	ENSMUSG00000025383.1	protein_coding	66	0.746
Slc28a1	ENSMUSG00000025726.6	protein_coding	35	0.605
Jade1	ENSMUSG00000025764.9	protein_coding	118	0.95
Pramel6	ENSMUSG00000025838.7	protein_coding	120	0.948
Pikfyve	ENSMUSG00000025949.10	protein_coding	48	0.797
Cfc1	ENSMUSG00000026124.3	protein_coding	80	0.791
Tfcp2l1	ENSMUSG00000026380.10	protein_coding	15	0.536
Il24	ENSMUSG00000026420.11	protein_coding	102	0.919
Eif2d	ENSMUSG00000026427.11	protein_coding	61	0.833
Atf3	ENSMUSG00000026628.8	protein_coding	26	0.656
Prrg4	ENSMUSG00000027171.5	protein_coding	84	0.898
Patl2	ENSMUSG00000027233.4	protein_coding	109	0.94
Zfp106	ENSMUSG00000027288.11	protein_coding	56	0.723
Chac1	ENSMUSG00000027313.3	protein_coding	30	0.526
Dnmt3b	ENSMUSG00000027478.10	protein_coding	94	0.899
Tpd52	ENSMUSG00000027506.10	protein_coding	33	0.612
Chmp4c	ENSMUSG00000027536.5	protein_coding	32	0.625
Sall4	ENSMUSG00000027547.12	protein_coding	96	0.9
Nmd3	ENSMUSG00000027787.9	protein_coding	48	0.726
Pdgfc	ENSMUSG00000028019.4	protein_coding	23	0.593
Acp6	ENSMUSG00000028093.10	protein_coding	16	0.548
Nudt17	ENSMUSG00000028100.6	protein_coding	13	0.497
Bnipl	ENSMUSG00000028115.11	protein_coding	50	0.736
Manba	ENSMUSG00000028164.10	protein_coding	85	0.826
Cyr61	ENSMUSG00000028195.3	protein_coding	24	0.602
Map3k7	ENSMUSG00000028284.8	protein_coding	12	0.504
Plaa	ENSMUSG00000028577.8	protein_coding	18	0.599
Pum1	ENSMUSG00000028580.10	protein_coding	11	0.504
Pramef12	ENSMUSG00000028591.6	protein_coding	100	0.921
Tfap2c	ENSMUSG00000028640.6	protein_coding	43	0.749
Zbtb8a	ENSMUSG00000028807.2	protein_coding	41	0.702
Car6	ENSMUSG00000028972.6	protein_coding	47	0.733
Slc26a5	ENSMUSG00000029015.4	protein_coding	39	0.665
Rest	ENSMUSG00000029249.10	protein_coding	63	0.85
Spp1	ENSMUSG00000029304.9	protein_coding	30	0.535
Enoph1	ENSMUSG00000029326.8	protein_coding	12	0.488
Fgf5	ENSMUSG00000029337.1	protein_coding	81	0.817
Ereg	ENSMUSG00000029377.4	protein_coding	56	0.753
Ppef2	ENSMUSG00000029410.8	protein_coding	75	0.814
Pde6b	ENSMUSG00000029491.7	protein_coding	21	0.42
Ankle2	ENSMUSG00000029501.9	protein_coding	60	0.841
Srcrb4d	ENSMUSG00000029699.8	protein_coding	8	0.433
Prdm5	ENSMUSG00000029913.9	protein_coding	64	0.859
Nfu1	ENSMUSG00000029993.11	protein_coding	38	0.644
Hmces	ENSMUSG00000030060.9	protein_coding	82	0.886
Gdf3	ENSMUSG00000030117.4	protein_coding	108	0.925
Dusp16	ENSMUSG00000030203.12	protein_coding	30	0.583
Tead4	ENSMUSG00000030353.10	protein_coding	45	0.68
Tdrd12	ENSMUSG00000030491.11	protein_coding	99	0.9
Trpm1	ENSMUSG00000030523.13	protein_coding	75	0.781
Pgpep1l	ENSMUSG00000030553.2	protein_coding	61	0.636
Calca	ENSMUSG00000030669.8	protein_coding	52	0.779
Hsd17b14	ENSMUSG00000030825.12	protein_coding	70	0.782
Ctbp2	ENSMUSG00000030970.11	protein_coding	23	0.619
Cul4b	ENSMUSG00000031095.10	protein_coding	82	0.81
Mcf2	ENSMUSG00000031139.9	protein_coding	93	0.889
Plp2	ENSMUSG00000031146.6	protein_coding	31	0.645
Eras	ENSMUSG00000031160.4	protein_coding	143	0.982
Slc7a3	ENSMUSG00000031297.9	protein_coding	97	0.923
Map3k15	ENSMUSG00000031303.8	protein_coding	39	0.663
Cdx4	ENSMUSG00000031326.2	protein_coding	113	0.907
N4bp1	ENSMUSG00000031652.10	protein_coding	18	0.593
Pou2f3	ENSMUSG00000032015.10	protein_coding	67	0.79
Usp28	ENSMUSG00000032267.7	protein_coding	46	0.764
Fbxo22	ENSMUSG00000032309.10	protein_coding	75	0.882
Ooep	ENSMUSG00000032346.7	protein_coding	95	0.924
Gsta4	ENSMUSG00000032348.5	protein_coding	46	0.66
Plod2	ENSMUSG00000032374.9	protein_coding	13	0.51
Ptgs2	ENSMUSG00000032487.8	protein_coding	79	0.785
Tdgf1	ENSMUSG00000032494.8	protein_coding	138	0.98
Lrrc2	ENSMUSG00000032495.4	protein_coding	38	0.614
2810474O19Rik	ENSMUSG00000032712.11	protein_coding	56	0.817
Trib3	ENSMUSG00000032715.9	protein_coding	31	0.604
Mctp2	ENSMUSG00000032776.8	protein_coding	16	0.459
Abcc4	ENSMUSG00000032849.8	protein_coding	19	0.516
Nlrp4f	ENSMUSG00000032999.9	protein_coding	112	0.93
Spg11	ENSMUSG00000033396.8	protein_coding	18	0.598
Mga	ENSMUSG00000033943.10	protein_coding	71	0.867
Gpbp1l1	ENSMUSG00000034042.11	protein_coding	24	0.565
Fbxo15	ENSMUSG00000034391.10	protein_coding	125	0.947
Lif	ENSMUSG00000034394.9	protein_coding	14	0.564
Eda2r	ENSMUSG00000034457.5	protein_coding	32	0.686
Six4	ENSMUSG00000034460.9	protein_coding	85	0.887
Diap2	ENSMUSG00000034480.13	protein_coding	13	0.444
Tiparp	ENSMUSG00000034640.4	protein_coding	61	0.867
Zyg11a	ENSMUSG00000034645.8	protein_coding	91	0.83
Egln3	ENSMUSG00000035105.5	protein_coding	10	0.339
Neil2	ENSMUSG00000035121.5	protein_coding	82	0.808
Nubpl	ENSMUSG00000035142.13	protein_coding	36	0.669
Tanc1	ENSMUSG00000035168.11	protein_coding	6	0.365
B020004J07Rik	ENSMUSG00000035201.10	protein_coding	92	0.84
Ccl7	ENSMUSG00000035373.2	protein_coding	17	0.536
Oser1	ENSMUSG00000035399.7	protein_coding	58	0.76
Wdr18	ENSMUSG00000035754.7	protein_coding	11	0.457
Pawr	ENSMUSG00000035873.7	protein_coding	18	0.582
Tmem55b	ENSMUSG00000035953.8	protein_coding	10	0.441
Prtg	ENSMUSG00000036030.9	protein_coding	89	0.903
Hif1an	ENSMUSG00000036450.4	protein_coding	18	0.513
Syde2	ENSMUSG00000036863.7	protein_coding	26	0.634
Gm12800	ENSMUSG00000037028.7	protein_coding	125	0.947
Nodal	ENSMUSG00000037171.6	protein_coding	126	0.949
Grhl3	ENSMUSG00000037188.7	protein_coding	71	0.805
Atg101	ENSMUSG00000037204.6	protein_coding	27	0.605
Bag4	ENSMUSG00000037316.8	protein_coding	36	0.524
Serpine1	ENSMUSG00000037411.5	protein_coding	53	0.665
Slc22a20	ENSMUSG00000037451.7	protein_coding	102	0.9
Atg14	ENSMUSG00000037526.6	protein_coding	79	0.881
Prkci	ENSMUSG00000037643.9	protein_coding	38	0.748
Ctnna1	ENSMUSG00000037815.6	protein_coding	8	0.388
Nufip2	ENSMUSG00000037857.11	protein_coding	66	0.847
Aim2	ENSMUSG00000037860.10	protein_coding	40	0.694
Jmjd1c	ENSMUSG00000037876.11	protein_coding	32	0.685
9630033F20Rik	ENSMUSG00000038028.8	protein_coding	33	0.631
Sult6b1	ENSMUSG00000038045.9	protein_coding	139	0.976
Phf20	ENSMUSG00000038116.11	protein_coding	26	0.671
Prdm1	ENSMUSG00000038151.7	protein_coding	25	0.609
Ttc39b	ENSMUSG00000038172.9	protein_coding	70	0.713
Cer1	ENSMUSG00000038192.5	protein_coding	82	0.791
Bend3	ENSMUSG00000038214.9	protein_coding	49	0.791
Ankrd35	ENSMUSG00000038354.8	protein_coding	30	0.623
Fig4	ENSMUSG00000038417.3	protein_coding	44	0.723
Jarid2	ENSMUSG00000038518.10	protein_coding	77	0.877
Cbfa2t2	ENSMUSG00000038533.10	protein_coding	42	0.743
Sycp2l	ENSMUSG00000038651.9	protein_coding	107	0.914
Ptpn3	ENSMUSG00000038764.9	protein_coding	22	0.454
Lefty1	ENSMUSG00000038793.8	protein_coding	89	0.861
Birc7	ENSMUSG00000038840.7	protein_coding	108	0.93
Rbpj	ENSMUSG00000039191.7	protein_coding	48	0.807
Tex19.1	ENSMUSG00000039329.8	protein_coding	107	0.914
Mreg	ENSMUSG00000039395.8	protein_coding	56	0.572
Dse	ENSMUSG00000039497.7	protein_coding	25	0.61
Usp53	ENSMUSG00000039701.7	protein_coding	40	0.65
Trub2	ENSMUSG00000039826.8	protein_coding	22	0.615
9130011E15Rik	ENSMUSG00000039901.9	protein_coding	21	0.558
Fam60a	ENSMUSG00000039985.9	protein_coding	102	0.923
Pvr	ENSMUSG00000040511.8	protein_coding	13	0.535
Aipl1	ENSMUSG00000040554.5	protein_coding	37	0.714
Plekhg1	ENSMUSG00000040624.12	protein_coding	20	0.568
Cyp2b23	ENSMUSG00000040650.8	protein_coding	88	0.833
Il17rd	ENSMUSG00000040717.5	protein_coding	21	0.619
Tet2	ENSMUSG00000040943.8	protein_coding	53	0.77
Sox15	ENSMUSG00000041287.5	protein_coding	116	0.965
Tcl1	ENSMUSG00000041359.9	protein_coding	79	0.856
Gk5	ENSMUSG00000041440.13	protein_coding	58	0.792
Alg13	ENSMUSG00000041718.10	protein_coding	68	0.845
Il17f	ENSMUSG00000041872.4	protein_coding	23	0.576
Tango6	ENSMUSG00000041949.5	protein_coding	23	0.583
Foxn4	ENSMUSG00000042002.6	protein_coding	45	0.682
Kdm5b	ENSMUSG00000042207.12	protein_coding	38	0.732
Gjb5	ENSMUSG00000042357.2	protein_coding	84	0.853
Gjb3	ENSMUSG00000042367.7	protein_coding	46	0.726
Prdm14	ENSMUSG00000042414.7	protein_coding	136	0.983
Arrdc4	ENSMUSG00000042659.9	protein_coding	26	0.633
Tom1	ENSMUSG00000042870.9	protein_coding	38	0.572
Mei4	ENSMUSG00000043289.7	protein_coding	73	0.85
E130012A19Rik	ENSMUSG00000043439.5	protein_coding	44	0.606
Fam25c	ENSMUSG00000043681.5	protein_coding	49	0.566
Olfr94	ENSMUSG00000043827.6	protein_coding	45	0.566
Muc19	ENSMUSG00000044021.9	protein_coding	19	0.409
Cep68	ENSMUSG00000044066.9	protein_coding	10	0.455
Cdkn2a	ENSMUSG00000044303.6	protein_coding	17	0.508
Alkbh2	ENSMUSG00000044339.7	protein_coding	46	0.75
2410080I02Rik	ENSMUSG00000044387.5	lincRNA	102	0.855
Dock5	ENSMUSG00000044447.4	protein_coding	22	0.586
Dnd1	ENSMUSG00000044595.10	protein_coding	15	0.47
Liph	ENSMUSG00000044626.7	protein_coding	38	0.678
Prss22	ENSMUSG00000045027.6	protein_coding	12	0.424
Plekha7	ENSMUSG00000045659.12	protein_coding	13	0.494
Smtnl2	ENSMUSG00000045667.9	protein_coding	9	0.491
Olfr984	ENSMUSG00000045812.3	protein_coding	137	0.985
C130073F10Rik	ENSMUSG00000046133.3	protein_coding	113	0.93
Dppa3	ENSMUSG00000046323.3	protein_coding	143	0.993
Ermp1	ENSMUSG00000046324.7	protein_coding	6	0.331
Fam19a4	ENSMUSG00000046500.7	protein_coding	37	0.707
B3gntl1	ENSMUSG00000046605.9	protein_coding	9	0.502
Gjb4	ENSMUSG00000046623.3	protein_coding	40	0.706
Mageb16	ENSMUSG00000046942.12	protein_coding	143	0.982
Zbtb21	ENSMUSG00000046962.10	protein_coding	57	0.812
Msgn1	ENSMUSG00000047002.1	protein_coding	24	0.55
Tet1	ENSMUSG00000047146.10	protein_coding	76	0.886
Olfr1495	ENSMUSG00000047207.2	protein_coding	104	0.892
Smgc	ENSMUSG00000047295.11	protein_coding	114	0.951
8030462N17Rik	ENSMUSG00000047466.9	protein_coding	58	0.803
Olfr26	ENSMUSG00000047667.5	protein_coding	98	0.874
Utf1	ENSMUSG00000047751.9	protein_coding	108	0.931
Rell1	ENSMUSG00000047881.9	protein_coding	14	0.507
Palm3	ENSMUSG00000047986.7	protein_coding	31	0.607
Zfp473	ENSMUSG00000048012.13	protein_coding	122	0.937
Rbm15	ENSMUSG00000048109.9	protein_coding	35	0.71
Gm7075	ENSMUSG00000048185.4	protein_coding	26	0.595
Crebrf	ENSMUSG00000048249.9	protein_coding	28	0.591
A730049H05Rik	ENSMUSG00000048636.7	protein_coding	55	0.742
Klhl11	ENSMUSG00000048732.5	protein_coding	21	0.575
Tmprss11f	ENSMUSG00000048764.11	protein_coding	59	0.695
Olfr985	ENSMUSG00000049073.5	protein_coding	144	0.99
Zfp518a	ENSMUSG00000049164.6	protein_coding	98	0.859
Smcr8	ENSMUSG00000049323.8	protein_coding	19	0.599
Hic2	ENSMUSG00000050240.9	protein_coding	69	0.84
Pnma5	ENSMUSG00000050424.9	protein_coding	87	0.876
Ism2	ENSMUSG00000050671.7	protein_coding	34	0.629
Fgf4	ENSMUSG00000050917.4	protein_coding	143	0.989
AY358078	ENSMUSG00000050961.4	protein_coding	96	0.91
Lin28a	ENSMUSG00000050966.4	protein_coding	125	0.949
Olfr986	ENSMUSG00000051095.5	protein_coding	144	0.99
Zfp42	ENSMUSG00000051176.5	protein_coding	132	0.958
Mrgprd	ENSMUSG00000051207.6	protein_coding	35	0.588
Trap1a	ENSMUSG00000051257.3	protein_coding	141	0.974
Serpinb6c	ENSMUSG00000052180.9	protein_coding	119	0.945
Zfp622	ENSMUSG00000052253.5	protein_coding	23	0.595
Gm9873	ENSMUSG00000052368.2	lincRNA	83	0.869
Tarm1	ENSMUSG00000053338.7	protein_coding	36	0.59
Gm6792	ENSMUSG00000053367.10	protein_coding	128	0.971
Krt42	ENSMUSG00000053654.7	protein_coding	141	0.985
Adnp2	ENSMUSG00000053950.10	protein_coding	17	0.615
Taf4b	ENSMUSG00000054321.6	protein_coding	54	0.784
2900041M22Rik	ENSMUSG00000054418.6	processed_transcript	81	0.82
AU018091	ENSMUSG00000054753.8	protein_coding	129	0.957
Zfp819	ENSMUSG00000055102.10	protein_coding	102	0.911
Tmem245	ENSMUSG00000055296.9	protein_coding	6	0.454
Tead1	ENSMUSG00000055320.11	protein_coding	7	0.434
Fam136b-ps	ENSMUSG00000055416.5	protein_coding	17	0.537
Zfp459	ENSMUSG00000055560.7	protein_coding	126	0.962
Mta3	ENSMUSG00000055817.12	protein_coding	26	0.551
Zkscan5	ENSMUSG00000055991.10	protein_coding	39	0.73
Rgs9bp	ENSMUSG00000056043.5	protein_coding	128	0.963
Dennd1b	ENSMUSG00000056268.10	protein_coding	24	0.606
Gm13247	ENSMUSG00000056300.9	protein_coding	137	0.984
Prl2c3	ENSMUSG00000056457.5	protein_coding	41	0.644
Rlim	ENSMUSG00000056537.6	protein_coding	80	0.803
Gm15514	ENSMUSG00000057215.6	lincRNA	114	0.925
Gm15698	ENSMUSG00000057534.8	protein_coding	64	0.748
Eif1a	ENSMUSG00000057561.4	protein_coding	56	0.781
Gapdh	ENSMUSG00000057666.13	protein_coding	18	0.428
Zfp809	ENSMUSG00000057982.7	protein_coding	36	0.627
Gm13242	ENSMUSG00000058186.8	protein_coding	143	0.981
Znrf2	ENSMUSG00000058446.9	protein_coding	10	0.418
Dppa4	ENSMUSG00000058550.9	protein_coding	143	0.983
Eno1b	ENSMUSG00000059040.4	protein_coding	48	0.675
Dppa5a	ENSMUSG00000060461.5	protein_coding	142	0.99
Vmn1r47	ENSMUSG00000060724.1	protein_coding	115	0.931
Cdh3	ENSMUSG00000061048.7	protein_coding	19	0.521
Acvr2b	ENSMUSG00000061393.8	protein_coding	33	0.66
Zfp229	ENSMUSG00000061544.8	protein_coding	89	0.9
Gm4953	ENSMUSG00000061992.1	protein_coding	12	0.408
Olfr924	ENSMUSG00000062103.4	protein_coding	121	0.946
T	ENSMUSG00000062327.5	protein_coding	93	0.924
Zfp534	ENSMUSG00000062518.7	protein_coding	134	0.967
Timm17a	ENSMUSG00000062580.4	protein_coding	12	0.427
Rps4l	ENSMUSG00000063171.3	protein_coding	37	0.626
Gm13248	ENSMUSG00000063245.6	protein_coding	92	0.874
Nkx6-3	ENSMUSG00000063672.7	protein_coding	91	0.88
Gm13939	ENSMUSG00000063751.6	processed_transcript	134	0.974
Gm10139	ENSMUSG00000063905.2	protein_coding	144	0.99
Gpn1	ENSMUSG00000064037.8	protein_coding	51	0.77
Zfp936	ENSMUSG00000064194.7	protein_coding	137	0.981
Plcxd1	ENSMUSG00000064247.9	protein_coding	21	0.507
Gm1631	ENSMUSG00000064263.6	lincRNA	115	0.931
2410137M14Rik	ENSMUSG00000064308.5	protein_coding	102	0.911
Gm13154	ENSMUSG00000065999.8	protein_coding	143	0.99
2610305D13Rik	ENSMUSG00000066000.7	protein_coding	129	0.955
Zfp600	ENSMUSG00000066007.10	protein_coding	143	0.992
Gm13051	ENSMUSG00000066009.8	protein_coding	122	0.953
Lefty2	ENSMUSG00000066652.5	protein_coding	108	0.929
Cldn9	ENSMUSG00000066720.6	protein_coding	55	0.76
Tmem211	ENSMUSG00000066964.2	protein_coding	84	0.853
Gm10197	ENSMUSG00000067085.1	protein_coding	46	0.623
Foxd3	ENSMUSG00000067261.4	protein_coding	51	0.632
Crygd	ENSMUSG00000067299.6	protein_coding	76	0.774
Gm13139	ENSMUSG00000067916.4	protein_coding	135	0.977
Rex2	ENSMUSG00000067919.8	protein_coding	89	0.826
Rhox9	ENSMUSG00000068048.8	protein_coding	123	0.955
Zfp442	ENSMUSG00000068130.6	protein_coding	66	0.828
Phf11d	ENSMUSG00000068245.9	protein_coding	85	0.838
Gm10260	ENSMUSG00000069117.3	protein_coding	38	0.704
Hist1h4n	ENSMUSG00000069305.3	protein_coding	35	0.515
Gm10273	ENSMUSG00000069622.4	protein_coding	33	0.515
Ahnak	ENSMUSG00000069833.7	protein_coding	9	0.518
Sco1	ENSMUSG00000069844.7	protein_coding	36	0.646
Gm12794	ENSMUSG00000070890.3	protein_coding	107	0.9
Vrtn	ENSMUSG00000071235.6	protein_coding	61	0.781
Gm10323	ENSMUSG00000071295.4	protein_coding	140	0.979
Gm10330	ENSMUSG00000071362.2	protein_coding	53	0.798
Rhox1	ENSMUSG00000071773.4	protein_coding	115	0.941
Trim6	ENSMUSG00000072244.4	protein_coding	117	0.94
Dppa2	ENSMUSG00000072419.4	protein_coding	142	0.986
Rpl21-ps4	ENSMUSG00000072714.1	protein_coding	46	0.771
Gm6712	ENSMUSG00000072761.5	lincRNA	93	0.873
5430403G16Rik	ENSMUSG00000072763.2	protein_coding	122	0.96
Zfp951	ENSMUSG00000072774.5	protein_coding	53	0.77
Ripply1	ENSMUSG00000072945.3	protein_coding	108	0.892
Gm10451	ENSMUSG00000073000.2	protein_coding	38	0.603
Fnd3c2	ENSMUSG00000073012.2	protein_coding	52	0.794
Gm1070	ENSMUSG00000073018.4	protein_coding	51	0.734
9030624G23Rik	ENSMUSG00000073158.3	protein_coding	39	0.722
Gm10479	ENSMUSG00000073184.3	protein_coding	44	0.744
5730507C01Rik	ENSMUSG00000073197.3	protein_coding	108	0.952
E330020D12Rik	ENSMUSG00000073538.5	processed_transcript	73	0.813
Nbeal1	ENSMUSG00000073664.6	protein_coding	48	0.779
Btbd19	ENSMUSG00000073771.6	protein_coding	27	0.65
9830147E19Rik	ENSMUSG00000074158.4	protein_coding	99	0.877
Crxos	ENSMUSG00000074365.8	protein_coding	63	0.777
Foxr1	ENSMUSG00000074397.3	protein_coding	99	0.905
C330013J21Rik	ENSMUSG00000074529.5	protein_coding	69	0.817
Lrrc31	ENSMUSG00000074653.5	protein_coding	22	0.612
Zfp345	ENSMUSG00000074731.3	protein_coding	125	0.948
Gm21994	ENSMUSG00000074735.2	protein_coding	94	0.877
Zfp640	ENSMUSG00000074830.3	protein_coding	141	0.989
2410141K09Rik	ENSMUSG00000074832.5	protein_coding	141	0.979
Gm10770	ENSMUSG00000074837.2	protein_coding	127	0.954
Gm5665	ENSMUSG00000074863.4	lincRNA	119	0.959
EU599041	ENSMUSG00000074887.3	protein_coding	139	0.987
Accsl	ENSMUSG00000075023.6	protein_coding	70	0.809
Cd80	ENSMUSG00000075122.4	protein_coding	30	0.645
Gm10842	ENSMUSG00000075485.1	protein_coding	120	0.936
Gm2178	ENSMUSG00000078128.1	protein_coding	88	0.858
Gm17374	ENSMUSG00000078197.2	protein_coding	94	0.903
2300003K06Rik	ENSMUSG00000078257.2	protein_coding	81	0.775
Gm13145	ENSMUSG00000078497.4	protein_coding	135	0.978
Gm13151	ENSMUSG00000078498.5	protein_coding	128	0.966
Gm13235	ENSMUSG00000078500.3	protein_coding	144	0.991
Gm13212	ENSMUSG00000078502.5	protein_coding	120	0.936
Gm13225	ENSMUSG00000078503.4	protein_coding	143	0.986
Pramef17	ENSMUSG00000078509.1	protein_coding	141	0.991
Gm12790	ENSMUSG00000078626.2	protein_coding	112	0.925
Gm10972	ENSMUSG00000078655.1	protein_coding	18	0.403
Mup6	ENSMUSG00000078689.3	protein_coding	113	0.923
Cacng6	ENSMUSG00000078815.3	protein_coding	53	0.641
Gm14322	ENSMUSG00000078864.5	protein_coding	112	0.95
Gm14406	ENSMUSG00000078865.3	protein_coding	131	0.96
Gm14412	ENSMUSG00000078868.3	protein_coding	99	0.91
Gm14409	ENSMUSG00000078869.2	protein_coding	120	0.947
Gm14401	ENSMUSG00000078872.4	protein_coding	125	0.969
Gm14419	ENSMUSG00000078875.5	protein_coding	121	0.963
Gm14288	ENSMUSG00000078889.6	protein_coding	43	0.632
Gm11008	ENSMUSG00000078891.4	lincRNA	65	0.8
Gm14443	ENSMUSG00000078902.3	protein_coding	84	0.881
Gm14444	ENSMUSG00000078906.4	protein_coding	82	0.89
Lincenc1	ENSMUSG00000078952.4	lincRNA	124	0.958
Gm14124	ENSMUSG00000079008.2	protein_coding	141	0.981
Gm14139	ENSMUSG00000079009.3	protein_coding	138	0.982
Gm8300	ENSMUSG00000079034.2	protein_coding	135	0.967
Trim61	ENSMUSG00000079042.4	protein_coding	69	0.805
Serpinb1c	ENSMUSG00000079049.3	protein_coding	34	0.419
Trim71	ENSMUSG00000079259.2	protein_coding	121	0.939
Gm7325	ENSMUSG00000079471.3	protein_coding	119	0.951
Fdx1l	ENSMUSG00000079677.1	protein_coding	15	0.392
Nlrp4g	ENSMUSG00000079741.4	protein_coding	83	0.817
Gm14074	ENSMUSG00000084762.1	lincRNA	141	0.984
Gm11463	ENSMUSG00000084816.1	lincRNA	113	0.926
Gm13838	ENSMUSG00000084921.1	lincRNA	56	0.655
Gm12743	ENSMUSG00000084968.1	processed_transcript	86	0.854
Gm13227	ENSMUSG00000085101.2	processed_transcript	125	0.96
Gm12758	ENSMUSG00000085105.1	processed_transcript	45	0.67
BC028777	ENSMUSG00000085185.4	processed_transcript	32	0.547
Gm16012	ENSMUSG00000085194.1	processed_transcript	106	0.927
Gm14261	ENSMUSG00000085322.1	processed_transcript	74	0.785
Linchoxa1	ENSMUSG00000085412.2	lincRNA	41	0.721
2410114N07Rik	ENSMUSG00000085824.2	processed_transcript	132	0.966
2410003L11Rik	ENSMUSG00000085860.1	processed_transcript	91	0.893
5330429C05Rik	ENSMUSG00000085896.2	lincRNA	72	0.706
Gm13448	ENSMUSG00000086001.1	processed_transcript	47	0.735
B230206L02Rik	ENSMUSG00000086003.2	processed_transcript	26	0.56
Gm16211	ENSMUSG00000086130.1	lincRNA	98	0.868
Gm13150	ENSMUSG00000086147.2	protein_coding	129	0.969
Gm16196	ENSMUSG00000086154.1	lincRNA	81	0.831
Kis2	ENSMUSG00000086173.2	processed_transcript	120	0.952
Gm12510	ENSMUSG00000086346.1	lincRNA	107	0.908
4930500J02Rik	ENSMUSG00000086454.2	processed_transcript	129	0.962
Gm12139	ENSMUSG00000086475.1	lincRNA	130	0.974
Gm14136	ENSMUSG00000086563.1	lincRNA	128	0.966
Gm13663	ENSMUSG00000086641.1	processed_transcript	86	0.895
5133400J02Rik	ENSMUSG00000086646.2	lincRNA	122	0.939
Gm12249	ENSMUSG00000086666.1	lincRNA	70	0.695
Gm11607	ENSMUSG00000086730.2	processed_transcript	131	0.956
C330013F16Rik	ENSMUSG00000086807.2	processed_transcript	121	0.947
Gm13110	ENSMUSG00000086810.1	processed_transcript	86	0.871
Gm13657	ENSMUSG00000086813.1	processed_transcript	47	0.652
4930566F21Rik	ENSMUSG00000086967.2	processed_transcript	102	0.903
L1td1	ENSMUSG00000087166.4	protein_coding	142	0.981
Gm14015	ENSMUSG00000087226.1	lincRNA	27	0.553
Gm13203	ENSMUSG00000087273.1	lincRNA	60	0.68
Gm12100	ENSMUSG00000087474.1	processed_transcript	101	0.886
2410019O14Rik	ENSMUSG00000087547.1	lincRNA	114	0.937
Gm13647	ENSMUSG00000087570.1	lincRNA	90	0.902
Gm16253	ENSMUSG00000087610.1	protein_coding	80	0.812
Gm12514	ENSMUSG00000087614.1	lincRNA	72	0.729
Gm15226	ENSMUSG00000087677.1	lincRNA	30	0.603
Gm17034	ENSMUSG00000090293.1	processed_transcript	70	0.779
2410012M07Rik	ENSMUSG00000090470.2	protein_coding	95	0.872
Zfp493	ENSMUSG00000090659.3	protein_coding	49	0.762
Gm340	ENSMUSG00000090673.1	protein_coding	52	0.798
Gm6871	ENSMUSG00000090744.2	protein_coding	131	0.974
Glyatl3	ENSMUSG00000091043.1	protein_coding	82	0.796
Gm10772	ENSMUSG00000091347.2	protein_coding	144	0.989
Gm17337	ENSMUSG00000091430.1	lincRNA	124	0.948
Triml2	ENSMUSG00000091490.2	protein_coding	125	0.947
Gm17067	ENSMUSG00000091594.2	protein_coding	139	0.974
Yy2	ENSMUSG00000091736.3	protein_coding	99	0.898
Gm4707	ENSMUSG00000091831.4	protein_coding	32	0.603
Bend4	ENSMUSG00000092060.1	protein_coding	47	0.759
Gm2381	ENSMUSG00000092225.1	protein_coding	145	0.989
Gm7221	ENSMUSG00000092335.1	protein_coding	121	0.963
BC033916	ENSMUSG00000092349.1	lincRNA	125	0.948
Gm20479	ENSMUSG00000092367.1	protein_coding	67	0.749
Gm20405	ENSMUSG00000092495.1	processed_transcript	34	0.595
Khdc3	ENSMUSG00000092622.3	protein_coding	69	0.815
Gm20684	ENSMUSG00000093405.1	processed_transcript	66	0.653
Gm4425	ENSMUSG00000093846.1	lincRNA	43	0.764
Gm5784	ENSMUSG00000093908.1	protein_coding	29	0.654
Gm13698	ENSMUSG00000094125.1	protein_coding	87	0.829
Vmn2r-ps104	ENSMUSG00000094499.1	protein_coding	85	0.802
Gm14403	ENSMUSG00000094786.1	protein_coding	48	0.742
Rhox5	ENSMUSG00000095180.3	protein_coding	106	0.904
Gm20939	ENSMUSG00000095193.1	protein_coding	126	0.956
Gm17404	ENSMUSG00000095206.1	protein_coding	144	0.99
Gm21893	ENSMUSG00000095262.1	protein_coding	75	0.717
Gm5225	ENSMUSG00000095266.1	protein_coding	133	0.967
Gm10130	ENSMUSG00000095315.1	protein_coding	63	0.822
Gm13043	ENSMUSG00000095409.1	protein_coding	138	0.988
Gm21863	ENSMUSG00000095470.1	protein_coding	19	0.531
Gm8888	ENSMUSG00000095638.1	protein_coding	89	0.845
Gm21817	ENSMUSG00000095651.1	lincRNA	54	0.583
Gm10324	ENSMUSG00000095909.1	protein_coding	140	0.987
Cphx1	ENSMUSG00000095975.3	protein_coding	99	0.881
Gm21060	ENSMUSG00000095993.1	protein_coding	142	0.984
Gm21761	ENSMUSG00000096175.2	protein_coding	77	0.785
Gm18856	ENSMUSG00000096192.1	protein_coding	16	0.563
Zfp960	ENSMUSG00000096696.1	protein_coding	91	0.865
Gm21971	ENSMUSG00000096751.3	processed_transcript	58	0.7
Gm21985	ENSMUSG00000096764.1	protein_coding	85	0.871
Gm4858	ENSMUSG00000096879.1	protein_coding	66	0.779
Zfp850	ENSMUSG00000096916.2	protein_coding	105	0.889
Gdap10	ENSMUSG00000096954.1	lincRNA	71	0.812
Gm26707	ENSMUSG00000097017.1	lincRNA	59	0.784
Gm26758	ENSMUSG00000097066.1	lincRNA	141	0.987
C330046G13Rik	ENSMUSG00000097076.1	lincRNA	137	0.975
Gm6846	ENSMUSG00000097107.1	lincRNA	137	0.986
Gm26624	ENSMUSG00000097122.1	lincRNA	80	0.873
Gm26780	ENSMUSG00000097147.1	lincRNA	88	0.848
C230088H06Rik	ENSMUSG00000097168.1	lincRNA	48	0.768
6030443J06Rik	ENSMUSG00000097207.2	lincRNA	42	0.735
Gm26598	ENSMUSG00000097229.1	lincRNA	121	0.935
Gm17250	ENSMUSG00000097235.1	lincRNA	102	0.925
Gm26785	ENSMUSG00000097390.1	lincRNA	37	0.665
2410088K16Rik	ENSMUSG00000097398.2	lincRNA	138	0.98
Gm26666	ENSMUSG00000097419.1	lincRNA	32	0.618
Gm17575	ENSMUSG00000097420.2	lincRNA	85	0.831
Gm16880	ENSMUSG00000097448.1	lincRNA	121	0.946
2310010G23Rik	ENSMUSG00000097468.1	lincRNA	85	0.865
Gm26586	ENSMUSG00000097472.1	lincRNA	36	0.721
Gm26806	ENSMUSG00000097483.1	lincRNA	109	0.912
Gm26538	ENSMUSG00000097507.1	lincRNA	59	0.804
Gm26845	ENSMUSG00000097525.1	lincRNA	109	0.928
Gm26749	ENSMUSG00000097546.1	lincRNA	18	0.49
C430002E04Rik	ENSMUSG00000097639.1	lincRNA	139	0.975
9330185C12Rik	ENSMUSG00000097648.1	lincRNA	40	0.685
A330094K24Rik	ENSMUSG00000097666.1	lincRNA	47	0.685
Gm26609	ENSMUSG00000097672.1	lincRNA	108	0.911
Gm26849	ENSMUSG00000097720.1	lincRNA	95	0.895
Gm26635	ENSMUSG00000097764.1	lincRNA	60	0.831
2310043M15Rik	ENSMUSG00000097768.1	lincRNA	56	0.731
Gm26754	ENSMUSG00000097849.1	lincRNA	89	0.849
Gm17580	ENSMUSG00000097851.1	lincRNA	112	0.933
Gm26856	ENSMUSG00000097864.1	lincRNA	88	0.862
C330002G04Rik	ENSMUSG00000097930.1	lincRNA	62	0.723
C430039J16Rik	ENSMUSG00000097932.1	lincRNA	109	0.911
Gm26945	ENSMUSG00000098061.1	lincRNA	80	0.76
Gm26975	ENSMUSG00000098161.1	lincRNA	131	0.971
Gm28048	ENSMUSG00000098650.1	protein_coding	31	0.596
Gm28044	ENSMUSG00000098781.1	protein_coding	39	0.627
CAAA01152789.1	ENSMUSG00000099364.1	lincRNA	92	0.837
RP24-105B23.1	ENSMUSG00000099370.1	lincRNA	132	0.963
RP23-458B6.16	ENSMUSG00000099452.1	lincRNA	96	0.878
RP23-337F21.1	ENSMUSG00000099528.1	lincRNA	73	0.747
RP23-21N15.5	ENSMUSG00000099847.1	lincRNA	39	0.585
RP24-149E13.1	ENSMUSG00000099922.1	lincRNA	82	0.806
RP23-179B10.1	ENSMUSG00000100188.1	lincRNA	57	0.78
RP24-324D14.2	ENSMUSG00000100704.1	protein_coding	63	0.743
RP23-21N15.3	ENSMUSG00000100760.1	lincRNA	84	0.795
RP24-479J20.1	ENSMUSG00000100816.1	lincRNA	57	0.783
RP23-21N15.4	ENSMUSG00000100932.1	lincRNA	65	0.663
RP24-547I3.1	ENSMUSG00000101061.1	lincRNA	142	0.987
RP23-75E19.2	ENSMUSG00000101859.1	lincRNA	26	0.596
9130401M01Rik	ENSMUSG00000101892.1	protein_coding	29	0.642
RP23-262K24.1	ENSMUSG00000102106.1	lincRNA	33	0.618
