# Supplementary material for: Regulation of the ESC transcriptome by nuclear long noncoding RNAs
Source: HighWire-hosted journal article supplement (doi:10.1101/gr.189027.114), 2015-06-05
Supplement: Supp5_PlatrTissueFpkm.xlsx [file Supp5_PlatrTissueFpkm.xlsx]

## Sheet: PAT_Tissue_FPKM
Platr	Gene short name	Gencode ID	Intra-module connections	Module correlation	ESC.Cast.FPKM	ESC.Ab22.FPKM	NPC.Cast.FPKM	NPC.Ab22.FPKM	Adrenal.Adult8wks.mean	Cbellum.Adult8wks.mean	Cns.E14.mean	Cns.E18.mean	Colon.Adult8wks.mean	Cortex.Adult8wks.mean	Flobe.Adult8wks.mean	Heart.Adult8wks.mean	Kidney.Adult8wks.mean	Lgint.Adult8wks.mean	Liver.Adult8wks.mean	Liver.E14half.mean	Liver.E14.mean	Liver.E18.mean	Lung.Adult.mean	Mamg.Adult8wks.mean	Ovary.Adult8wks.mean	Sfat.Adult8wks.mean	Spleen.Adult8wks.mean	Testis.Adult8wks.mean	Thymus.Adult8wks.mean	Wbrain.E14half.mean
Platr1	RP24-547I3.1	ENSMUSG00000101061.1	142	0.987	0.443284	0.340012	0.0145078	0.0209377	0	0.0169157	0.0079146	0.0107072	0.00338624	0	0.00636353	0	0.00196926	0	0	0.0428182	0.0370359	0.013425	0.0145741	0	0.0109723	0.0220736	0.00602705	0.00290291	0.0120089	0.0229459
Platr2	Gm26758	ENSMUSG00000097066.1	141	0.987	3.19687	1.64422	0.0122666	0.00160718	0.00144878	0.000387615	0.000519895	0.000559089	0.00129227	0.00044629	0.000757548	0.00122666	0.00208104	0.000473328	0	0	8.09405e-05	0	0.000835943	0.00386242	0.00324306	0.00165445	0.00174566	0.132188	0.00534872	0.000858959
Platr3	Gm14074	ENSMUSG00000084762.1	141	0.984	6.46367	5.26297	0.0043022	0.0219927	0	0.21201	0.0253571	0.0249363	0	0.0450936	0.0413965	0.020503	0.0183953	0	0	0.00634155	0	0.00160841	0	0.00302791	0	0.00633995	0	0.0233651	0.00454701	0.0285106
Platr4	C430002E04Rik	ENSMUSG00000097639.1	139	0.975	6.52237	7.3261	0.00423209	0.0158193	0	0.0128397	0.00541855	0.00819279	0.0127872	0.0105318	0.00104567	0	0	0	0.112774	0.00470382	0.0170154	0.0363553	0.00222757	0.0291571	0	0	0.00234752	0.0438381	0	0.00096734
Platr5	2410088K16Rik	ENSMUSG00000097398.2	138	0.98	1.00239	0.62932	0.00806071	0	0	0	0.031213	0.00392055	0	0	0.016939	0	0.0189716	0	0	0	0	0	0.0130339	0.0285448	0	0	0	0.134523	0	0.034127
Platr6	Gm6846	ENSMUSG00000097107.1	137	0.986	1.38927	0.909748	0.000941213	0	0.00625945	0.0988684	0.0300978	0.068239	0	0.0273743	0.0379123	0.0221146	0.0213249	0.0113315	0	0.050181	0.0406975	0.0353721	0.0734671	0.00421121	0.0987473	0.021109	0.00775606	0.00624839	0.00855667	0.0236025
Platr7	C330046G13Rik	ENSMUSG00000097076.1	137	0.975	3.2623	3.31947	0.00457468	0.00586211	0	0.00371678	0.014799	0.0391717	0.0037924	0.00405332	0.00436377	0	0.0590336	0	0	0.0178375	0.0330065	0.17803	0.0188172	0.0155186	0.0061688	0	0.114307	0.0402717	0.0083204	0.0170017
Platr8	Gm13939	ENSMUSG00000063751.6	134	0.974	0.859295	0.90749	0.0808706	0.0554808	0.00990868	0.100491	0.0405667	0.0560476	0.0375383	0.0359466	0.0357292	0.0461316	0.0288568	0.0277667	0.0410195	0.0633019	0.0395903	0.0298054	0.0931581	0.0602864	0.0364806	0.0440195	0.0342066	0.0168212	0.0407602	0.0538015
Platr9	2410114N07Rik	ENSMUSG00000085824.2	132	0.966	0.80261	0.501854	0.0124414	0	0	0.00679657	0.0286061	0.0150128	0	0	0	0	0	0.00632685	0.113324	0.00124551	0.00449444	0.0407793	0	0.00356816	0.007826	0	0	0.00359329	0.0199326	0.00912031
Platr10	RP24-105B23.1	ENSMUSG00000099370.1	132	0.963	23.7989	48.9301	0.00166652	0.0448576	0.00123252	0.0557218	0.0271124	0.0699112	0.00135521	0.0309207	0.0823711	0.0015007	0.000969645	0	0.0086678	0.0108663	0.00329109	0.00061281	0	0.0353284	0.00173821	0.00120777	0.037725	0.00116177	0.0101294	0.0490223
Platr11	Gm26975	ENSMUSG00000098161.1	131	0.971	4.68547	1.45076	0.0184499	0	0	0	0	0	0	0	0	0	0	0	0	0	0	0	0	0.0060353	0	0	0.0051439	0.171958	0.0071667	0
Platr12	Gm11607	ENSMUSG00000086730.2	131	0.956	5.36505	9.41991	0.00529427	0	0	0.00289304	0.0020066	0.0148315	0.00143907	0.0637239	0.0669531	0.00162441	0	0	0	0	0	0.00121527	0	0.00249747	0	0.00646464	0	0.15865	0.00217637	0.0109581
Platr13	Gm12139	ENSMUSG00000086475.1	130	0.974	205.495	31.438	0.188211	0.168969	0.200637	0.441026	1.51327	1.04394	0.239976	0.374717	0.315701	0.0885453	0.262232	0.0727181	0.0411272	0.189855	0.275228	0.167515	0.238509	0.177517	0.154343	0.170294	0.215124	0.284348	0.222171	1.23125
Platr14	4930500J02Rik	ENSMUSG00000086454.2	129	0.962	100.934	48.6203	0.0909593	0.244282	0.00185534	0.0812405	1.59757	0.663298	0.0214667	0.382556	0.200744	0.00373252	0.0295263	0.00407449	0	0.0557876	0.148031	0.0373498	0.00519381	0.0125137	0.035576	0.097348	0.0217159	1.74823	0.0195961	1.30009
Platr15	Gm14136	ENSMUSG00000086563.1	128	0.966	0.231792	0.109091	0	0	0	0	0	0.00472425	0	0.0142352	0	0	0	0	0	0	0	0	0	0	0	0	0	0	0	0.0114988
Platr16	Gm13227	ENSMUSG00000085101.2	125	0.96	2.37371	0.71066	0.0113426	0.00570724	0.00077541	0.00152936	0.00219123	0.00224454	0.00252002	0.0033196	0.00469398	0.00705289	0.00274559	0.00517595	0.00112538	0.00961627	0.00762782	0.00279392	0.00653757	0.0225203	0.00944769	0.00778398	0.0158454	0.0567911	0.0861449	0.00295281
Platr17	BC033916	ENSMUSG00000092349.1	125	0.948	4.38653	6.25511	0	0	0.0253102	0.0368612	0.0497949	0.0210621	0	0.219375	0.274236	0.0154088	0	0.0195277	0.0220401	0.176755	0.247192	0.247652	0.0273599	0.193351	0.053542	0.062005	0.0431309	0.027546	0.0295384	0.0538735
Platr18	Lincenc1	ENSMUSG00000078952.4	124	0.958	62.6974	99.4387	0.0104126	0.256782	0.888355	0.402874	0.784748	1.1221	0.0408969	0.0302352	0.0639646	0.0153439	0.00829409	0.0294549	0	0.0632942	0.0425082	0.00673666	0.058438	0.135353	0.199106	0.153085	0.0777094	0.0555332	0.141768	1.25474
Platr19	Gm17337	ENSMUSG00000091430.1	124	0.948	0.185712	0.226114	0.00921501	0	0	0	0.00206894	0.00543862	0.0105575	0.00087692	0.0051908	0	0	0.0153476	0.00282278	0.0143073	0.00621298	0.0360516	0	0.00191854	0	0	0.00163517	0	0	0.00140154
Platr20	5133400J02Rik	ENSMUSG00000086646.2	122	0.939	3.22162	5.88852	0.0025792	0.19205	0	0	0	0.00010857	0	0	0	0	0	0	0	0	0	0	0.000319649	0	0	0	0	0.5061	0	0.000144366
Platr21	C330013F16Rik	ENSMUSG00000086807.2	121	0.947	4.05834	3.73827	0.00249847	0.000295418	0	0.00643933	0.0714633	0.0295825	0	0.00497898	0.00423846	0	0.282065	0	0	0.0155345	0.0277188	0.0223121	0.427113	0	8.55025e-48	0.000321877	0	0.695699	8.06945e-05	0.0455991
Platr22	Gm16880	ENSMUSG00000097448.1	121	0.946	2.96304	3.60744	0.0085567	0.0230673	0.00501068	0.00906134	0.00201389	0.00769191	0.00112548	0.0209078	0.0219239	0.00803946	0.053909	0.00134095	0.107204	0.132218	0.084191	0.268022	0.487735	0.0206811	0.0436916	0.0486494	0.00171074	0.0973607	0.0063432	0.00319434
Platr23	Gm26598	ENSMUSG00000097229.1	121	0.935	0.771528	1.30705	0.0181781	0	0	0.0108698	0.00314836	0.00769169	0	0.0493154	0.0278722	0	0	0	0	0.00547175	0.0117681	0.0143978	0	0	0.00499183	0	0	0.0154542	0.00665658	0
Platr24	Kis2	ENSMUSG00000086173.2	120	0.952	4.18375	5.25046	0	0.0475544	0	0.00374564	0.0178084	0.00227445	0	0.00378456	0	0.0214901	0.0197486	0.0934515	0	0	0.0062259	0.0077596	0	0.052957	0.0338774	0	0.0747426	0	0.779712	0.00483558
Platr25	Gm5665	ENSMUSG00000074863.4	119	0.959	6.03628	3.15633	0.145352	1.03024	0.00732576	0.0619856	0.237907	0.167694	0.016888	0.16499	0.132681	0.0272156	0.0463521	0.0271159	0.00606332	0.0921854	0.118032	0.0421518	0.0202559	0.0314591	0.0271734	0.0473678	0.0183105	0.106402	0.0410919	0.244285
Platr26	Gm1631	ENSMUSG00000064263.6	115	0.931	1.15429	2.09077	0.0237712	0.00601133	0.000985255	0.00240265	0.00453442	0.00579618	0.0576187	0.0283712	0.0581436	0.0763117	0	0.12623	0	0.0149953	0.00257302	0.000842351	0.00857412	0.0521155	0.152322	0.0727807	0.00175726	0.00163236	0.00268528	0.00595497
Platr27	2410019O14Rik	ENSMUSG00000087547.1	114	0.937	3.94933	2.96035	0.0225137	0.0551914	0	0.00966405	0.0559794	0.0201265	0.078639	0.0087845	0.00264065	0	0	0.0800144	0	0.586246	0.639459	0.146535	0.0175512	0.0695055	0.022898	0.0150337	0.0344988	0.0106184	0.0355372	0.0442491
Platr28	Gm15514	ENSMUSG00000057215.6	114	0.925	0.491517	0.529122	0.00209957	0.000605062	0	0	0.00341666	0	0	9.4242e-05	0	0	0	0	0	0	0	0	0	0	0	0	0	0.214931	0	0.00371721
Platr29	Gm11463	ENSMUSG00000084816.1	113	0.926	0.239996	0.0846739	0.000736766	0	4.92898e-08	5.67809e-09	0.00534855	0.00194717	0.00122468	0.0025215	0.00150178	1.00662e-09	0.0027658	1.47815e-07	0.0118572	0.0109519	0.0164277	0.00280653	0.00273041	0.0230341	0.00132825	0.00112047	0.022113	0.00109957	1.93134e-08	0.00598475
Platr30	Gm17580	ENSMUSG00000097851.1	112	0.933	1.8096	0.470426	0.0167443	0	0	0.0196733	0.00179571	0.00077641	0.00131276	0	0	0	0	0	0	0.0087487	0.00134888	0.00054377	0	0	0.170436	0.00116993	0	0.179937	0.000839075	0
Platr31	Gm26845	ENSMUSG00000097525.1	109	0.928	0.353808	0.324618	0.075217	0.0500946	0.0395534	0.101068	0.0742247	0.0482266	0.0323053	0.0863276	0.0780853	0.0670212	0.00314109	0.0458795	0.0137997	0.0160562	0.0158333	0.012212	0.0395117	0.037242	0.0283293	0.0301552	0.069756	0.0729336	0.0450003	0.0702507
Platr32	Gm16012	ENSMUSG00000085194.1	106	0.927	0.179473	0.208782	0.00358308	0.0814423	0	2.65471e-07	0.00987867	0.0064745	0	0.00597783	0.0315252	2.66626e-08	1.37198e-08	1.15834e-11	0.00122507	0.000886283	0.0187979	0.0130776	5.8648e-08	5.27821e-07	0.00101078	1.65749e-08	0.00791818	0.00204226	0.0130786	0.00490587
