# Supplementary material for: Regulation of the ESC transcriptome by nuclear long noncoding RNAs
Source: HighWire-hosted journal article supplement (doi:10.1101/gr.189027.114), 2015-06-05
Supplement: Supp6_RnaFishProbes.xlsx [file Supp6_RnaFishProbes.xlsx]

## Sheet: RNA_FISH_probes
Firre probes	Platr14 probes
GTGATGGTTAGAAGAAGGCATCA	TGCTGTCCCCATTCCAAAAA
CCATTTTCTATCACCAACTTGTCTTC	GAAACTCTAGCAGCTACATCTTACATATA
TTTATAAAGTGGTTGTCTTCAGTTCTC	CATCCGCCATGATACCGG
AAATTCAAGCAGGCAAGGGT	CAGAAGCAGTTTGTAGTCTGAACCA
TGTCTTCTGACAGCTCATCACCAC	TACTCTGATTCTTCTTCTCTTAGTCACA
CCTTCACTTCCTGTGCCGG	CGGAGATTAAGAGAGTATGTTTCTCTT
AGGAGTGGCGATCCTGCC	GCTCCTCCTGCCGTTAATCTT
TCACAGTTCAGAGCAAACTGGG	GACAGCACCTTTGTGAAATTCTAGA
CTGACCCTTTCAGTGGGGC	TTTTTCTCTAGATTTTCATGTGTCCT
GAGCCAGAGCACCAAAGAAAG	TTTTTGGTCTCTTCAAGCTGGTC
CGGTTCGTGACAGTGCTGTCT	TGTGATTGGCAGGCTTTCTTC
GCAGCAAATCCCAGGGGC	GTGTGTCTCAGAATCTCTGGAGGA
ATGTCTCAGTGAACTCAGGTTCTGA	CCCCCTACACCAGGGGTGT
GCCTCCAGTGCTTGCTCCTG	GGGTGTCACCTTTCAGATGGTGT
AGGATCCAGCAGCACCCG	TTAGCTGGTACTTATATTCCGTAGAAT
GTCCTGCATGGCTCCCATC	CTTTTTCTTCAAGTGTGTGTCCTCT
GTGTGCAGGCCATGGTCAA	GCATTCACAAGACCTCATTGTCTC
CCCCTTCTCCTGGGAAGAAGT	GTTTAGAAGTAAGCTTTGAAAAATTAGA
GGGGCCAGTCCTTCCTCATT	TATAGGAAAAGGGAGTTGTAGACCT
GGTTCTGAGCAGCAAATCCCA	CAGAGGTAGAGGAAGAAGGAGGTC
GCTCCTGATGTCTCAGTGAACTCA	TTCCCTTCTAGCCCACCAAC
CACCCGACCTCCAGTGCTT
GCCGATCTGGGTCCAGCAG
ATGGTCAAGTCCTGCATGGC
GGAAGAAGTGTGTGCAGGCC
CTTCCTCACTCCCATTCTCCTG
ATCCCAGGGGCCGGTT
GAACTCAGGTTCTGAGCAGCAA
TGCTTGCTCCTGATGTCTCAGT
GCAGCACCTGGCCTCCAG
GGCTCCCATCTGGGTCCA
GCCATGGTCAAGTCCTGCAT
CCTGGGAAGAAGTGTGTGCAG
AGTCCTTCCTCATTCCCCTTCT
AGCAAATCCCAGGGGCC
CCAGCAGCACCCGGCC
GCATGGCTCCCATCAGGAT
GCAGGCCATGGTCAAGTCCT
CCTTCTCCTGGGAAGAAGTGTGT
GGCCAGTCCTTCCTCATTCC
TCTGAGCAGCAAATCCCAGG
CCTGATGTCTCAGTGAACTCAGGT
CCGACCTCCAGTGCTTGCT
CGATCTGGGTCCAGCAGCAC
TCAAGTCCTGCATGGCGC
GAAGTGTGTGCAGGCCATGG
CACTCCCATTCTCCTGGGAA
CAGGGGCCGGTTCTTCCT
CAGGTTCTGAGCAGCAAATCC
TTGCTCCTGATGTCTCAGTGAACT
GCACCTGGCCTCCAGTGC
CTCCCATCTGGGTCCAGCA
CCATGGTCAAGTCCTGCATGG
CTGGGAAGAAGTGTGTGCAGG
TCCTTCCTCATTCCCCTTCTC
GCAAATCCCAGGGGCCAG
CAGTGAACTCAGGTCCTGAGCA
CCAGTGCTTGCTCCTGATGTCT
TCCAGCAGCACCCAGCCT
GCATGGCTCCCATCTGGG
GCAGGCCATGGTCAAGTCCT
CCTTCTCCTGGGAAGAAGTGTGT
CCTTCAAGCCTTCCTCATTCC
CCATCCTTGATTACCCTTCTCTCA
CACCACATATGGCCACAAAGG
TGCATACATGATGGCAGAAGGA
GTAATGGCTCTGCACTGTAGCTC
CTAGGATTCATGGGAATGAAGCT
TCTGGCATTGTGTCCCCACTA
CAAATCCCAGGGGCCAGT
