# Supplementary material for: Regulation of the ESC transcriptome by nuclear long noncoding RNAs
Source: HighWire-hosted journal article supplement (doi:10.1101/gr.189027.114), 2015-06-05
Supplement: Supp7_ChipSeqPeaks.xlsx [file Supp7_ChipSeqPeaks.xlsx]

## Sheet: Oct4_ChIP_ESC
#PeakID	chr	start	end	Fold Change vs Control	p-value vs Control	Fold Change vs Local	p-value vs Local
chr1-1	chr1	180924854	180925002	59.41	5.53e-211	67.88	8.21e-220
chr1-10	chr1	12744585	12744733	74.36	4.48e-142	50.45	5.41e-126
chr1-100	chr1	186513999	186514147	40.63	8.51e-65	19.93	5.57e-49
chr1-1000	chr1	36513854	36514002	4.6	1.9e-05	17.75	9.67e-12
chr1-1001	chr1	37997228	37997376	4.22	8.93e-05	15.92	2.15e-10
chr1-1002	chr1	38255819	38255967	36.8	2.18e-15	57.06	1.27e-17
chr1-1003	chr1	38630869	38631017	9.2	1.53e-08	19.48	3.36e-12
chr1-1004	chr1	39281634	39281782	33.73	8.02e-14	27.12	8.16e-13
chr1-1005	chr1	40395843	40395991	36.8	2.18e-15	46.99	1.24e-16
chr1-1007	chr1	43338342	43338490	15.33	2e-09	30.26	3.08e-12
chr1-1008	chr1	43856556	43856704	33.73	8.02e-14	56.33	3.25e-16
chr1-1009	chr1	51271927	51272075	18.4	6.44e-12	28.53	4.2e-14
chr1-101	chr1	20867463	20867611	38.33	5.4e-60	56.41	3.25e-68
chr1-1010	chr1	51548963	51549111	9.2	1.53e-08	61.45	5.28e-18
chr1-1011	chr1	51624776	51624924	6.13	1.09e-06	22.19	7.61e-13
chr1-1012	chr1	54399720	54399868	36.8	2.18e-15	42.04	4.59e-16
chr1-1013	chr1	54930771	54930919	9.2	1.53e-08	18.15	7.5e-12
chr1-1014	chr1	59456990	59457138	4.22	8.93e-05	16.64	1.36e-10
chr1-1015	chr1	62805993	62806141	9.2	1.53e-08	44.38	2.43e-16
chr1-1016	chr1	63210344	63210492	6.13	1.09e-06	8.88	2.25e-08
chr1-1017	chr1	63667676	63667824	33.73	8.02e-14	20.34	1.69e-11
chr1-1018	chr1	65728070	65728218	16.87	1.19e-10	31.84	1.49e-13
chr1-1019	chr1	66700083	66700231	18.4	6.44e-12	15.98	3.18e-11
chr1-102	chr1	151177508	151177656	26.58	2.62e-54	51.66	6.47e-69
chr1-1020	chr1	69010234	69010382	36.8	2.18e-15	99.85	1.68e-20
chr1-1021	chr1	70862289	70862437	33.73	8.02e-14	20.92	1.26e-11
chr1-1022	chr1	71672482	71672630	8.43	1.42e-07	8.61	1.15e-07
chr1-1023	chr1	72212372	72212520	16.87	1.19e-10	6.54	1.65e-06
chr1-1024	chr1	72672032	72672180	36.8	2.18e-15	14.01	1.38e-10
chr1-1025	chr1	72718978	72719126	36.8	2.18e-15	21.59	1.04e-12
chr1-1026	chr1	74730663	74730811	9.2	1.53e-08	33.28	7.02e-15
chr1-1027	chr1	75219319	75219467	9.2	1.53e-08	12.48	4.98e-10
chr1-1028	chr1	75862920	75863068	33.73	8.02e-14	33.28	9.25e-14
chr1-1029	chr1	77473918	77474066	9.2	1.53e-08	9.62	9.36e-09
chr1-103	chr1	171471541	171471689	159.46	4.43e-94	80.5	8.78e-79
chr1-1030	chr1	80323458	80323606	36.8	2.18e-15	33.28	7.02e-15
chr1-1031	chr1	81718286	81718434	33.73	8.02e-14	30.51	2.34e-13
chr1-1032	chr1	83036900	83037048	15.33	2e-09	7.83	1e-06
chr1-1033	chr1	84637358	84637506	15.33	2e-09	8.65	4.15e-07
chr1-1034	chr1	84731870	84732018	36.8	2.18e-15	30.72	1.78e-14
chr1-1035	chr1	85305707	85305855	30.67	2.7e-12	35.04	7.43e-13
chr1-1036	chr1	86064285	86064433	5.62	6.79e-06	11.09	8.46e-09
chr1-1037	chr1	86348965	86349113	18.4	6.44e-12	19.48	3.36e-12
chr1-1038	chr1	86918106	86918254	33.73	8.02e-14	30.51	2.34e-13
chr1-1039	chr1	87297502	87297650	16.87	1.19e-10	30.51	2.34e-13
chr1-104	chr1	21256609	21256757	78.2	1.15e-76	44.67	1.81e-64
chr1-1041	chr1	88284229	88284377	8.43	1.42e-07	13.31	1.34e-09
chr1-1042	chr1	88468001	88468149	16.87	1.19e-10	16.27	1.72e-10
chr1-1043	chr1	88774337	88774485	33.73	8.02e-14	33.28	9.25e-14
chr1-1045	chr1	89465668	89465816	8.43	1.42e-07	15.26	3.34e-10
chr1-1046	chr1	89934738	89934886	18.4	6.44e-12	6.1	1.16e-06
chr1-1047	chr1	90203216	90203364	9.2	1.53e-08	9.29	1.38e-08
chr1-1048	chr1	90203850	90203998	9.2	1.53e-08	9.18	1.56e-08
chr1-1049	chr1	90729236	90729384	8.43	1.42e-07	31.84	1.49e-13
chr1-105	chr1	128392527	128392675	39.1	1.38e-61	70.73	1.79e-74
chr1-1050	chr1	90733988	90734136	36.8	2.18e-15	22.82	5.51e-13
chr1-1051	chr1	93191153	93191301	9.2	1.53e-08	29.59	2.76e-14
chr1-1052	chr1	94079209	94079357	6.13	1.09e-06	28.53	4.2e-14
chr1-1053	chr1	95500785	95500933	33.73	8.02e-14	36.61	3.34e-14
chr1-1054	chr1	99623151	99623299	36.8	2.18e-15	53.25	2.86e-17
chr1-1055	chr1	102264574	102264722	30.67	2.7e-12	23.77	3.14e-11
chr1-1056	chr1	103740451	103740599	36.8	2.18e-15	57.06	1.27e-17
chr1-1057	chr1	104987625	104987773	16.87	1.19e-10	34.87	5.63e-14
chr1-1058	chr1	106058272	106058420	16.87	1.19e-10	24.41	2.49e-12
chr1-1059	chr1	106176993	106177141	33.73	8.02e-14	23.62	3.51e-12
chr1-106	chr1	132471198	132471346	78.2	1.15e-76	41.4	8e-63
chr1-1060	chr1	110659330	110659478	36.8	2.18e-15	57.06	1.27e-17
chr1-1062	chr1	119167566	119167714	18.4	6.44e-12	21.02	1.41e-12
chr1-1063	chr1	119451761	119451909	30.67	2.7e-12	11.28	3.4e-08
chr1-1064	chr1	121419220	121419368	16.87	1.19e-10	48.82	1.52e-15
chr1-1065	chr1	121567914	121568062	5.11	3.88e-05	33.28	1.22e-12
chr1-1066	chr1	122455284	122455432	18.4	6.44e-12	30.72	1.78e-14
chr1-1067	chr1	126753702	126753850	30.67	2.7e-12	39.16	2.52e-13
chr1-1068	chr1	127262277	127262425	8.43	1.42e-07	20.92	1.26e-11
chr1-1069	chr1	131020891	131021039	36.8	2.18e-15	14.52	9.25e-11
chr1-107	chr1	164494226	164494374	11.17	3.16e-35	27.16	9.24e-54
chr1-1070	chr1	131139260	131139408	33.73	8.02e-14	9.76	3.32e-08
chr1-1071	chr1	131150395	131150543	8.43	1.42e-07	13.31	1.34e-09
chr1-1072	chr1	132277277	132277425	33.73	8.02e-14	9.15	6.32e-08
chr1-1073	chr1	132333758	132333906	33.73	8.02e-14	14.36	6.22e-10
chr1-1074	chr1	132834032	132834180	7.67	1.21e-06	23.77	3.14e-11
chr1-1075	chr1	133012757	133012905	33.73	8.02e-14	33.28	9.25e-14
chr1-1076	chr1	133493461	133493609	33.73	8.02e-14	9.04	7.14e-08
chr1-1077	chr1	133661377	133661525	9.2	1.53e-08	13.77	1.67e-10
chr1-1078	chr1	134061075	134061223	5.62	6.79e-06	9.51	4.32e-08
chr1-1079	chr1	135174643	135174791	36.8	2.18e-15	14.79	7.53e-11
chr1-108	chr1	51931763	51931911	25.04	4.65e-50	88.16	3e-76
chr1-1080	chr1	135759769	135759917	5.62	6.79e-06	18.31	5.07e-11
chr1-1081	chr1	136879727	136879875	33.73	8.02e-14	34.87	5.63e-14
chr1-1083	chr1	137387637	137387785	8.43	1.42e-07	33.28	9.25e-14
chr1-1084	chr1	138929080	138929228	33.73	8.02e-14	40.68	1.08e-14
chr1-1085	chr1	138956801	138956949	18.4	6.44e-12	22.82	5.51e-13
chr1-1086	chr1	139391683	139391831	18.4	6.44e-12	66.57	2.05e-18
chr1-1087	chr1	140438243	140438391	9.2	1.53e-08	7.01	2.76e-07
chr1-1088	chr1	143217393	143217541	33.73	8.02e-14	36.61	3.34e-14
chr1-1089	chr1	147215870	147216018	5.62	6.79e-06	52.3	7.23e-16
chr1-109	chr1	74851438	74851586	36.03	2.86e-55	48.89	2.33e-61
chr1-1090	chr1	150392689	150392837	18.4	6.44e-12	22.82	5.51e-13
chr1-1091	chr1	151544136	151544284	16.87	1.19e-10	14.64	5.07e-10
chr1-1093	chr1	151706167	151706315	18.4	6.44e-12	66.57	2.05e-18
chr1-1094	chr1	151878552	151878700	8.43	1.42e-07	11.44	6.21e-09
chr1-1095	chr1	153899633	153899781	6.13	1.09e-06	15.66	3.97e-11
chr1-1096	chr1	154292829	154292977	33.73	8.02e-14	56.33	3.25e-16
chr1-1097	chr1	155557992	155558140	9.2	1.53e-08	44.38	2.43e-16
chr1-1098	chr1	156613886	156614034	9.2	1.53e-08	13.31	2.44e-10
chr1-11	chr1	36985995	36986143	148.73	5.35e-171	16.02	1.88e-79
chr1-110	chr1	88608990	88609138	38.33	5.4e-60	22.95	3.13e-49
chr1-1100	chr1	157439982	157440130	8.43	1.42e-07	23.62	3.51e-12
chr1-1101	chr1	158203031	158203179	36.8	2.18e-15	29.59	2.76e-14
chr1-1102	chr1	161160365	161160513	16.87	1.19e-10	18.31	5.07e-11
chr1-1103	chr1	161247671	161247819	8.43	1.42e-07	10.77	1.25e-08
chr1-1104	chr1	162570438	162570586	4.6	1.9e-05	28.53	4.2e-14
chr1-1105	chr1	165771706	165771854	8.43	1.42e-07	13.56	1.11e-09
chr1-1106	chr1	166002585	166002733	18.4	6.44e-12	11.75	1.05e-09
chr1-1107	chr1	166964610	166964758	9.2	1.53e-08	49.93	6.1e-17
chr1-1108	chr1	167021586	167021734	18.4	6.44e-12	29.59	2.76e-14
chr1-1109	chr1	167046268	167046416	18.4	6.44e-12	22.19	7.61e-13
chr1-111	chr1	89876459	89876607	156.39	7.06e-92	28.29	1.24e-54
chr1-1110	chr1	167287739	167287887	8.43	1.42e-07	7.4	5.08e-07
chr1-1111	chr1	170894794	170894942	15.33	2e-09	10.24	8.18e-08
chr1-1112	chr1	172027382	172027530	6.13	1.09e-06	21.02	1.41e-12
chr1-1113	chr1	173321928	173322076	36.8	2.18e-15	33.28	7.02e-15
chr1-1114	chr1	174486261	174486409	36.8	2.18e-15	23.49	3.95e-13
chr1-1115	chr1	176724195	176724343	9.2	1.53e-08	28.53	4.2e-14
chr1-1117	chr1	178318143	178318291	4.22	8.93e-05	9.9	2.91e-08
chr1-1118	chr1	180454454	180454602	36.8	2.18e-15	24.96	1.97e-13
chr1-1119	chr1	180945769	180945917	16.87	1.19e-10	10.93	1.07e-08
chr1-112	chr1	119348568	119348716	37.57	2.07e-58	25.89	9.75e-51
chr1-1120	chr1	181742445	181742593	18.4	6.44e-12	34.73	4.28e-15
chr1-1121	chr1	183379619	183379767	33.73	8.02e-14	24.41	2.49e-12
chr1-1122	chr1	184705346	184705494	36.8	2.18e-15	72.62	7.34e-19
chr1-1123	chr1	190298933	190299081	30.67	2.7e-12	24.65	2.21e-11
chr1-1124	chr1	190533979	190534127	18.4	6.44e-12	29.59	2.76e-14
chr1-1125	chr1	191014395	191014543	16.87	1.19e-10	28.16	5.47e-13
chr1-1126	chr1	191030335	191030483	18.4	6.44e-12	17	1.58e-11
chr1-1127	chr1	191062920	191063068	16.87	1.19e-10	24.41	2.49e-12
chr1-1128	chr1	192454962	192455110	8.43	1.42e-07	17.03	1.07e-10
chr1-1129	chr1	193152985	193153133	4.6	1.9e-05	29.59	2.76e-14
chr1-113	chr1	167498066	167498214	76.66	8.97e-75	65.26	2.51e-71
chr1-1130	chr1	193265886	193266034	33.73	8.02e-14	61.02	1.37e-16
chr1-1131	chr1	194721387	194721535	30.67	2.7e-12	55.47	8.34e-15
chr1-1132	chr1	4150860	4151008	8.43	1.42e-07	34.87	5.63e-14
chr1-1133	chr1	5778656	5778804	7.67	1.21e-06	21.47	8.3e-11
chr1-1134	chr1	7312575	7312723	8.43	1.42e-07	8.51	1.29e-07
chr1-1135	chr1	9056322	9056470	30.67	2.7e-12	73.96	4.91e-16
chr1-1136	chr1	13590043	13590191	8.43	1.42e-07	22.19	6.78e-12
chr1-1137	chr1	16021757	16021905	30.67	2.7e-12	39.16	2.52e-13
chr1-1138	chr1	20760400	20760548	8.43	1.42e-07	11.44	6.21e-09
chr1-1139	chr1	21067695	21067843	16.87	1.19e-10	36.61	3.34e-14
chr1-114	chr1	185105079	185105227	38.33	5.4e-60	62.8	1.67e-70
chr1-1141	chr1	30867878	30868026	15.33	2e-09	20.8	1.12e-10
chr1-1142	chr1	33494621	33494769	30.67	2.7e-12	13.59	6.16e-09
chr1-1143	chr1	33714958	33715106	15.33	2e-09	16.24	1.17e-09
chr1-1144	chr1	33899268	33899416	16.87	1.19e-10	30.51	2.34e-13
chr1-1145	chr1	34140810	34140958	16.87	1.19e-10	12.41	2.74e-09
chr1-1146	chr1	34499597	34499745	33.73	8.02e-14	43.07	5.85e-15
chr1-1148	chr1	34569920	34570068	15.33	2e-09	27.74	7.13e-12
chr1-1149	chr1	34579619	34579767	8.43	1.42e-07	34.87	5.63e-14
chr1-115	chr1	89756469	89756617	144.13	3.74e-83	52.14	1.19e-62
chr1-1150	chr1	35024914	35025062	30.67	2.7e-12	60.52	3.55e-15
chr1-1153	chr1	36614522	36614670	15.33	2e-09	19.58	2e-10
chr1-1154	chr1	36707997	36708145	30.67	2.7e-12	22.19	6.07e-11
chr1-1155	chr1	36940341	36940489	8.43	1.42e-07	8.61	1.15e-07
chr1-1156	chr1	36943691	36943839	8.43	1.42e-07	9.27	5.58e-08
chr1-1157	chr1	37064697	37064845	15.33	2e-09	20.8	1.12e-10
chr1-1159	chr1	40052167	40052315	30.67	2.7e-12	31.7	1.96e-12
chr1-116	chr1	151515862	151516010	18.4	6.11e-43	63.9	4.11e-68
chr1-1160	chr1	42167953	42168101	33.73	8.02e-14	43.07	5.85e-15
chr1-1161	chr1	42726300	42726448	33.73	8.02e-14	20.34	1.69e-11
chr1-1162	chr1	42918075	42918223	16.87	1.19e-10	13.82	9.21e-10
chr1-1163	chr1	46964095	46964243	30.67	2.7e-12	26.63	1.06e-11
chr1-1164	chr1	51937584	51937732	8.43	1.42e-07	45.77	3.05e-15
chr1-1165	chr1	52598039	52598187	8.43	1.42e-07	33.28	9.25e-14
chr1-1166	chr1	53377550	53377698	24.53	2.29e-09	35.5	1.32e-10
chr1-1167	chr1	54570077	54570225	8.43	1.42e-07	52.3	7.23e-16
chr1-1168	chr1	54607024	54607172	15.33	2e-09	31.7	1.96e-12
chr1-1169	chr1	54909424	54909572	15.33	2e-09	41.6	1.39e-13
chr1-117	chr1	11330279	11330427	72.06	3.8e-69	68.01	5.54e-68
chr1-1170	chr1	55040070	55040218	15.33	2e-09	24.65	2.21e-11
chr1-1171	chr1	56684432	56684580	33.73	8.02e-14	22.88	4.91e-12
chr1-1173	chr1	62708624	62708772	30.67	2.7e-12	12.8	1.07e-08
chr1-1174	chr1	62736694	62736842	27.6	8.29e-11	12.23	8.37e-08
chr1-1175	chr1	63646226	63646374	16.87	1.19e-10	56.33	3.25e-16
chr1-1176	chr1	67411745	67411893	30.67	2.7e-12	51.21	1.83e-14
chr1-1178	chr1	72265540	72265688	16.87	1.19e-10	30.51	2.34e-13
chr1-1179	chr1	72312784	72312932	33.73	8.02e-14	9.27	5.58e-08
chr1-118	chr1	58570576	58570724	147.19	2.54e-85	138.92	4e-84
chr1-1180	chr1	72811224	72811372	33.73	8.02e-14	7.11	7.44e-07
chr1-1181	chr1	75797896	75798044	15.33	2e-09	17.99	4.45e-10
chr1-1182	chr1	75846323	75846471	33.73	8.02e-14	52.3	7.23e-16
chr1-1183	chr1	76276735	76276883	16.87	1.19e-10	61.02	1.37e-16
chr1-1184	chr1	79378565	79378713	33.73	8.02e-14	45.77	3.05e-15
chr1-1185	chr1	80676778	80676926	30.67	2.7e-12	47.55	3.78e-14
chr1-1186	chr1	84214255	84214403	33.73	8.02e-14	16.64	1.36e-10
chr1-1187	chr1	84549712	84549860	8.43	1.42e-07	81.36	6.04e-18
chr1-1188	chr1	85210764	85210912	15.33	2e-09	95.1	4.1e-17
chr1-119	chr1	3914187	3914335	147.19	2.54e-85	122.89	1.38e-81
chr1-1190	chr1	86303327	86303475	15.33	2e-09	8.53	4.66e-07
chr1-1193	chr1	86582826	86582974	16.87	1.19e-10	13.31	1.34e-09
chr1-1194	chr1	87270400	87270548	30.67	2.7e-12	23.77	3.14e-11
chr1-1195	chr1	87676123	87676271	15.33	2e-09	10.91	4.6e-08
chr1-1197	chr1	88949945	88950093	30.67	2.7e-12	35.04	7.43e-13
chr1-1198	chr1	89513270	89513418	5.11	3.88e-05	13.31	7.43e-09
chr1-1199	chr1	89940926	89941074	33.73	8.02e-14	7.71	3.41e-07
chr1-12	chr1	86311020	86311168	144.13	1.71e-164	20.72	5.6e-87
chr1-120	chr1	6458082	6458230	70.53	2.74e-67	80.58	6.48e-70
chr1-1200	chr1	90564907	90565055	16.87	1.19e-10	27.12	8.16e-13
chr1-1201	chr1	90621888	90622036	15.33	2e-09	55.47	8.34e-15
chr1-1202	chr1	91088464	91088612	5.11	3.88e-05	35.04	7.43e-13
chr1-1203	chr1	91414181	91414329	8.43	1.42e-07	9.39	4.91e-08
chr1-1205	chr1	92163980	92164128	7.67	1.21e-06	16.24	1.17e-09
chr1-1206	chr1	92365798	92365946	27.6	8.29e-11	19.97	1.35e-09
chr1-1207	chr1	93305800	93305948	16.87	1.19e-10	52.3	7.23e-16
chr1-1208	chr1	99590819	99590967	30.67	2.7e-12	36.98	4.39e-13
chr1-1209	chr1	101756613	101756761	33.73	8.02e-14	10.17	2.21e-08
chr1-121	chr1	36982616	36982764	73.6	5.17e-71	8.61	2.25e-28
chr1-1210	chr1	105723262	105723410	30.67	2.7e-12	51.21	1.83e-14
chr1-1211	chr1	106171520	106171668	15.33	2e-09	19.58	2e-10
chr1-1212	chr1	110774891	110775039	16.87	1.19e-10	24.41	2.49e-12
chr1-1213	chr1	118459105	118459253	4.22	8.93e-05	12.85	1.93e-09
chr1-1214	chr1	118689854	118690002	33.73	8.02e-14	16.27	1.72e-10
chr1-1216	chr1	126916587	126916735	33.73	8.02e-14	33.28	9.25e-14
chr1-1217	chr1	127784194	127784342	16.87	1.19e-10	10.93	1.07e-08
chr1-1218	chr1	129001909	129002057	7.67	1.21e-06	44.38	7.42e-14
chr1-1219	chr1	131020489	131020637	15.33	2e-09	13.59	6.16e-09
chr1-122	chr1	70806842	70806990	72.06	3.8e-69	94.81	1.12e-74
chr1-1221	chr1	132306939	132307087	5.11	3.88e-05	17.99	4.45e-10
chr1-1223	chr1	132659709	132659857	15.33	2e-09	21.47	8.3e-11
chr1-1225	chr1	134910646	134910794	30.67	2.7e-12	44.38	7.42e-14
chr1-1226	chr1	135502233	135502381	15.33	2e-09	23.77	3.14e-11
chr1-1228	chr1	135639157	135639305	30.67	2.7e-12	13.59	6.16e-09
chr1-123	chr1	86201475	86201623	144.13	3.74e-83	80.22	2.63e-71
chr1-1231	chr1	141008404	141008552	16.87	1.19e-10	122.04	7.3e-20
chr1-1234	chr1	152116586	152116734	33.73	8.02e-14	31.84	1.49e-13
chr1-1235	chr1	152837137	152837285	30.67	2.7e-12	14.47	3.43e-09
chr1-1236	chr1	152903069	152903217	15.33	2e-09	12.1	1.79e-08
chr1-1237	chr1	153749306	153749454	33.73	8.02e-14	29.29	3.61e-13
chr1-1238	chr1	161148136	161148284	33.73	8.02e-14	25.25	1.74e-12
chr1-1239	chr1	161769492	161769640	5.62	6.79e-06	33.28	9.25e-14
chr1-124	chr1	87313259	87313407	144.13	3.74e-83	34.38	2.44e-54
chr1-1240	chr1	162354833	162354981	16.87	1.19e-10	34.87	5.63e-14
chr1-1242	chr1	164323353	164323501	16.87	1.19e-10	48.82	1.52e-15
chr1-1244	chr1	165396445	165396593	30.67	2.7e-12	47.55	3.78e-14
chr1-1245	chr1	165583647	165583795	6.9	9.38e-06	22.19	5.46e-10
chr1-1246	chr1	165614092	165614240	30.67	2.7e-12	12.8	1.07e-08
chr1-1247	chr1	167279527	167279675	33.73	8.02e-14	7.18	6.77e-07
chr1-1248	chr1	170588054	170588202	33.73	8.02e-14	21.54	9.28e-12
chr1-1249	chr1	170885390	170885538	15.33	2e-09	7.01	2.66e-06
chr1-125	chr1	128860156	128860304	72.06	3.8e-69	42.28	1.88e-58
chr1-1250	chr1	171440747	171440895	33.73	8.02e-14	12.2	3.24e-09
chr1-1251	chr1	171478073	171478221	16.87	1.19e-10	18.78	3.89e-11
chr1-1252	chr1	171887174	171887322	30.67	2.7e-12	41.6	1.39e-13
chr1-1253	chr1	172499755	172499903	15.33	2e-09	12.1	1.79e-08
chr1-1254	chr1	175627643	175627791	16.87	1.19e-10	34.87	5.63e-14
chr1-1255	chr1	175766509	175766657	8.43	1.42e-07	30.51	2.34e-13
chr1-1256	chr1	176138437	176138585	30.67	2.7e-12	21.47	8.3e-11
chr1-1257	chr1	177509528	177509676	30.67	2.7e-12	55.47	8.34e-15
chr1-1258	chr1	177623507	177623655	15.33	2e-09	35.04	7.43e-13
chr1-1259	chr1	177805718	177805866	16.87	1.19e-10	61.02	1.37e-16
chr1-126	chr1	182191306	182191454	70.53	2.74e-67	90.06	4.13e-72
chr1-1260	chr1	178544627	178544775	7.67	1.21e-06	18.49	3.43e-10
chr1-1263	chr1	181039584	181039732	33.73	8.02e-14	66.57	5.33e-17
chr1-1264	chr1	181144159	181144307	5.62	6.79e-06	22.19	6.78e-12
chr1-1265	chr1	181860689	181860837	16.87	1.19e-10	13.56	1.11e-09
chr1-1267	chr1	182297281	182297429	7.67	1.21e-06	31.7	1.96e-12
chr1-1268	chr1	183717201	183717349	15.33	2e-09	47.55	3.78e-14
chr1-1269	chr1	186110511	186110659	33.73	8.02e-14	81.36	6.04e-18
chr1-127	chr1	132981362	132981510	36.03	2.86e-55	62.57	2.63e-66
chr1-1270	chr1	186236446	186236594	30.67	2.7e-12	14.79	2.79e-09
chr1-1271	chr1	186261522	186261670	30.67	2.7e-12	22.95	4.39e-11
chr1-1272	chr1	187787473	187787621	4.22	8.93e-05	45.77	3.05e-15
chr1-1273	chr1	188660540	188660688	6.9	9.38e-06	17.12	5e-09
chr1-1274	chr1	189771226	189771374	8.43	1.42e-07	23.62	3.51e-12
chr1-1275	chr1	191907585	191907733	5.11	3.88e-05	14.16	4.19e-09
chr1-1276	chr1	193036102	193036250	5.62	6.79e-06	31.84	1.49e-13
chr1-1278	chr1	193576090	193576238	8.43	1.42e-07	23.62	3.51e-12
chr1-1279	chr1	193922660	193922808	8.43	1.42e-07	81.36	6.04e-18
chr1-128	chr1	152917724	152917872	35.27	1.03e-53	30.02	1.36e-50
chr1-1280	chr1	194774981	194775129	33.73	8.02e-14	73.22	1.9e-17
chr1-1281	chr1	4803112	4803260	15.33	2e-09	11.68	2.48e-08
chr1-1282	chr1	5022912	5023060	13.8	3.06e-08	9.99	4.39e-07
chr1-1283	chr1	7068725	7068873	27.6	8.29e-11	31.53	2.6e-11
chr1-1284	chr1	7494142	7494290	24.53	2.29e-09	19.72	1.21e-08
chr1-1285	chr1	9572150	9572298	30.67	2.7e-12	33.28	1.22e-12
chr1-1288	chr1	11461762	11461910	30.67	2.7e-12	23.77	3.14e-11
chr1-1289	chr1	12718147	12718295	27.6	8.29e-11	19.97	1.35e-09
chr1-129	chr1	194616225	194616373	69	1.93e-65	93.61	2.5e-71
chr1-1291	chr1	13052157	13052305	15.33	2e-09	28.94	4.73e-12
chr1-1293	chr1	13617377	13617525	30.67	2.7e-12	19.58	2e-10
chr1-1294	chr1	13664392	13664540	15.33	2e-09	9.51	1.76e-07
chr1-1295	chr1	15649936	15650084	27.6	8.29e-11	17.62	3.91e-09
chr1-1297	chr1	20896106	20896254	27.6	8.29e-11	21.4	7.46e-10
chr1-1298	chr1	22378182	22378330	27.6	8.29e-11	7.68	4.02e-06
chr1-1299	chr1	22509608	22509756	30.67	2.7e-12	47.55	3.78e-14
chr1-13	chr1	132850932	132851080	36.42	2.67e-110	78.07	3.62e-141
chr1-130	chr1	54585658	54585806	137.99	7.61e-79	55.47	3.03e-61
chr1-1300	chr1	25064120	25064268	13.8	3.06e-08	29.96	4.07e-11
chr1-1301	chr1	25242517	25242665	30.67	2.7e-12	47.55	3.78e-14
chr1-1302	chr1	25462765	25462913	15.33	2e-09	23.77	3.14e-11
chr1-1303	chr1	27057991	27058139	30.67	2.7e-12	66.57	1.39e-15
chr1-1304	chr1	30756932	30757080	30.67	2.7e-12	44.38	7.42e-14
chr1-1309	chr1	36890831	36890979	7.67	1.21e-06	17.99	4.45e-10
chr1-131	chr1	63247498	63247646	70.53	2.74e-67	25.31	2.66e-47
chr1-1311	chr1	36962855	36963003	7.67	1.21e-06	17.07	7.31e-10
chr1-1312	chr1	43484155	43484303	27.6	8.29e-11	18.72	2.34e-09
chr1-1313	chr1	47834121	47834269	30.67	2.7e-12	36.98	4.39e-13
chr1-1315	chr1	52150126	52150274	5.11	3.88e-05	23.77	3.14e-11
chr1-1316	chr1	52233610	52233758	5.11	3.88e-05	19.58	2e-10
chr1-1317	chr1	55237033	55237181	7.67	1.21e-06	31.7	1.96e-12
chr1-1318	chr1	55383218	55383366	6.9	9.38e-06	46.09	9.37e-13
chr1-1319	chr1	55900958	55901106	6.9	9.38e-06	22.19	5.46e-10
chr1-132	chr1	84177162	84177310	35.27	1.03e-53	87.49	1.54e-71
chr1-1320	chr1	57083189	57083337	27.6	8.29e-11	35.24	9.86e-12
chr1-1321	chr1	57719232	57719380	30.67	2.7e-12	66.57	1.39e-15
chr1-1322	chr1	58393027	58393175	15.33	2e-09	22.19	6.07e-11
chr1-1323	chr1	58403871	58404019	15.33	2e-09	41.6	1.39e-13
chr1-1324	chr1	58411411	58411559	15.33	2e-09	23.77	3.14e-11
chr1-1325	chr1	59247779	59247927	15.33	2e-09	25.6	1.54e-11
chr1-1328	chr1	60565337	60565485	5.11	3.88e-05	14.79	2.79e-09
chr1-1329	chr1	62737921	62738069	30.67	2.7e-12	11.89	2.11e-08
chr1-133	chr1	152070546	152070694	69	1.93e-65	115.21	2.4e-75
chr1-1330	chr1	62828438	62828586	13.8	3.06e-08	18.72	2.34e-09
chr1-1332	chr1	63118603	63118751	7.67	1.21e-06	11.48	2.91e-08
chr1-1333	chr1	64038344	64038492	27.6	8.29e-11	28.53	6.22e-11
chr1-1334	chr1	64659568	64659716	30.67	2.7e-12	23.77	3.14e-11
chr1-1337	chr1	72006060	72006208	7.67	1.21e-06	22.95	4.39e-11
chr1-1338	chr1	72237079	72237227	30.67	2.7e-12	11.48	2.91e-08
chr1-134	chr1	179276978	179277126	67.46	1.33e-63	43.07	3.54e-55
chr1-1340	chr1	72537069	72537217	7.67	1.21e-06	24.65	2.21e-11
chr1-1341	chr1	73263673	73263821	27.6	8.29e-11	46.09	9.37e-13
chr1-1342	chr1	73940970	73941118	5.11	3.88e-05	73.96	4.91e-16
chr1-1344	chr1	74505734	74505882	6.9	9.38e-06	7.58	4.45e-06
chr1-1345	chr1	74885747	74885895	13.8	3.06e-08	13.93	2.83e-08
chr1-1347	chr1	75381063	75381211	15.33	2e-09	15.85	1.47e-09
chr1-1348	chr1	75480784	75480932	5.11	3.88e-05	9.79	1.35e-07
chr1-1349	chr1	75511508	75511656	7.67	1.21e-06	6.46	5.36e-06
chr1-135	chr1	36061148	36061296	33.73	1.26e-50	17.75	7.4e-39
chr1-1350	chr1	75559627	75559775	5.11	3.88e-05	24.65	2.21e-11
chr1-1351	chr1	75754279	75754427	27.6	8.29e-11	26.05	1.37e-10
chr1-1352	chr1	79299664	79299812	5.11	3.88e-05	47.55	3.78e-14
chr1-1353	chr1	81305188	81305336	27.6	8.29e-11	37.44	5.8e-12
chr1-1356	chr1	86472227	86472375	7.67	1.21e-06	8.88	3.28e-07
chr1-1359	chr1	86758170	86758318	30.67	2.7e-12	17.52	5.72e-10
chr1-136	chr1	36987891	36988039	69	1.93e-65	7.74	7.18e-25
chr1-1360	chr1	87213825	87213973	5.11	3.88e-05	16.64	9.27e-10
chr1-1361	chr1	88262432	88262580	12.27	4.23e-07	7.3	1.97e-05
chr1-1362	chr1	88453406	88453554	27.6	8.29e-11	19.33	1.78e-09
chr1-1363	chr1	88466782	88466930	7.67	1.21e-06	13.59	6.16e-09
chr1-1364	chr1	88705880	88706028	5.11	3.88e-05	10.91	4.6e-08
chr1-1365	chr1	88839595	88839743	15.33	2e-09	23.77	3.14e-11
chr1-1366	chr1	88964152	88964300	30.67	2.7e-12	28.94	4.73e-12
chr1-1367	chr1	90202255	90202403	13.8	3.06e-08	6.89	9.53e-06
chr1-1368	chr1	91044263	91044411	15.33	2e-09	17.99	4.45e-10
chr1-137	chr1	41140653	41140801	67.46	1.33e-63	88.76	8.94e-69
chr1-1370	chr1	91538580	91538728	30.67	2.7e-12	8.76	3.69e-07
chr1-1371	chr1	91547727	91547875	27.6	8.29e-11	23.04	3.94e-10
chr1-1375	chr1	93888490	93888638	27.6	8.29e-11	59.91	9.24e-14
chr1-1376	chr1	95754685	95754833	6.9	9.38e-06	18.15	3.04e-09
chr1-1377	chr1	97769983	97770131	6.9	9.38e-06	18.72	2.34e-09
chr1-1378	chr1	102351029	102351177	30.67	2.7e-12	25.6	1.54e-11
chr1-1379	chr1	104464494	104464642	13.8	3.06e-08	37.44	5.8e-12
chr1-138	chr1	75443187	75443335	22.49	3.72e-43	52.3	8.07e-59
chr1-1380	chr1	104838149	104838297	30.67	2.7e-12	35.04	7.43e-13
chr1-1381	chr1	105002662	105002810	30.67	2.7e-12	51.21	1.83e-14
chr1-1382	chr1	106345074	106345222	30.67	2.7e-12	47.55	3.78e-14
chr1-1383	chr1	109942315	109942463	15.33	2e-09	66.57	1.39e-15
chr1-1384	chr1	111824118	111824266	30.67	2.7e-12	66.57	1.39e-15
chr1-1385	chr1	114849754	114849902	15.33	2e-09	39.16	2.52e-13
chr1-1386	chr1	117458300	117458448	15.33	2e-09	12.33	1.51e-08
chr1-1389	chr1	120073770	120073918	15.33	2e-09	12.33	1.51e-08
chr1-139	chr1	87729205	87729353	69	1.93e-65	53.49	1.51e-60
chr1-1390	chr1	126880960	126881108	13.8	3.06e-08	66.57	3.63e-14
chr1-1391	chr1	127780953	127781101	5.11	3.88e-05	9.94	1.18e-07
chr1-1392	chr1	130352050	130352198	30.67	2.7e-12	26.63	1.06e-11
chr1-1393	chr1	131146030	131146178	30.67	2.7e-12	12.1	1.79e-08
chr1-1396	chr1	132158819	132158967	15.33	2e-09	15.48	1.83e-09
chr1-1397	chr1	132188557	132188705	15.33	2e-09	17.07	7.31e-10
chr1-1398	chr1	133053120	133053268	13.8	3.06e-08	14.61	1.9e-08
chr1-1399	chr1	133084382	133084530	15.33	2e-09	14.16	4.19e-09
chr1-14	chr1	13074527	13074675	70.53	9.18e-133	38.04	1.43e-108
chr1-140	chr1	128094798	128094946	134.93	1.05e-76	73.22	3.82e-65
chr1-1401	chr1	134381734	134381882	7.67	1.21e-06	13.05	8.92e-09
chr1-1402	chr1	134382383	134382531	6.9	9.38e-06	11.98	9.89e-08
chr1-1403	chr1	134419231	134419379	27.6	8.29e-11	9.66	5.73e-07
chr1-1405	chr1	135199462	135199610	27.6	8.29e-11	6.31	1.89e-05
chr1-1406	chr1	135739501	135739649	6.9	9.38e-06	24.96	1.98e-10
chr1-1407	chr1	136939792	136939940	15.33	2e-09	19.58	2e-10
chr1-1408	chr1	137657188	137657336	27.6	8.29e-11	33.28	1.63e-11
chr1-1409	chr1	137738710	137738858	30.67	2.7e-12	24.65	2.21e-11
chr1-141	chr1	132288397	132288545	128.79	1.87e-72	31.06	6.03e-47
chr1-1410	chr1	138903602	138903750	27.6	8.29e-11	21.4	7.46e-10
chr1-1412	chr1	139676212	139676360	30.67	2.7e-12	73.96	4.91e-16
chr1-1413	chr1	143777113	143777261	7.67	1.21e-06	22.95	4.39e-11
chr1-1414	chr1	143820616	143820764	15.33	2e-09	19.02	2.63e-10
chr1-1415	chr1	146426940	146427088	30.67	2.7e-12	39.16	2.52e-13
chr1-1416	chr1	149097566	149097714	13.8	3.06e-08	42.79	1.8e-12
chr1-1417	chr1	150639625	150639773	15.33	2e-09	55.47	8.34e-15
chr1-1418	chr1	151110607	151110755	15.33	2e-09	25.6	1.54e-11
chr1-1419	chr1	152992391	152992539	27.6	8.29e-11	16.64	6.35e-09
chr1-142	chr1	132879024	132879172	131.86	1.42e-74	42.09	1.52e-53
chr1-1420	chr1	155001991	155002139	27.6	8.29e-11	15.77	1e-08
chr1-1421	chr1	156474922	156475070	7.67	1.21e-06	15.85	1.47e-09
chr1-1422	chr1	156752506	156752654	15.33	2e-09	31.7	1.96e-12
chr1-1423	chr1	157253551	157253699	7.67	1.21e-06	51.21	1.83e-14
chr1-1424	chr1	157412586	157412734	15.33	2e-09	20.8	1.12e-10
chr1-1425	chr1	157940383	157940531	13.8	3.06e-08	33.28	1.63e-11
chr1-1426	chr1	159430063	159430211	12.27	4.23e-07	29.59	5.41e-10
chr1-1427	chr1	160145633	160145781	30.67	2.7e-12	27.74	7.13e-12
chr1-1428	chr1	160780806	160780954	27.6	8.29e-11	85.59	3.9e-15
chr1-1429	chr1	162589510	162589658	30.67	2.7e-12	44.38	7.42e-14
chr1-143	chr1	140245585	140245733	21.98	8.38e-42	60.9	2.58e-60
chr1-1430	chr1	163309539	163309687	27.6	8.29e-11	16.19	8e-09
chr1-1431	chr1	164307437	164307585	6.9	9.38e-06	31.53	2.6e-11
chr1-1432	chr1	164369589	164369737	15.33	2e-09	15.13	2.27e-09
chr1-1435	chr1	166907436	166907584	27.6	8.29e-11	20.66	1.01e-09
chr1-1437	chr1	167733572	167733720	27.6	8.29e-11	42.79	1.8e-12
chr1-1438	chr1	168026591	168026739	13.8	3.06e-08	42.79	1.8e-12
chr1-1439	chr1	168056737	168056885	5.11	3.88e-05	33.28	1.22e-12
chr1-144	chr1	11277963	11278111	64.4	5.93e-60	43.01	9.85e-53
chr1-1440	chr1	168065882	168066030	13.8	3.06e-08	27.23	9.31e-11
chr1-1441	chr1	168358146	168358294	13.8	3.06e-08	18.15	3.04e-09
chr1-1443	chr1	170867690	170867838	5.11	3.88e-05	8.32	5.84e-07
chr1-1445	chr1	171046729	171046877	5.11	3.88e-05	12.8	1.07e-08
chr1-1446	chr1	171413309	171413457	13.8	3.06e-08	10.7	2.51e-07
chr1-1447	chr1	171960778	171960926	15.33	2e-09	35.04	7.43e-13
chr1-1448	chr1	172314928	172315076	27.6	8.29e-11	7.88	3.27e-06
chr1-1449	chr1	172457546	172457694	15.33	2e-09	10.57	6.17e-08
chr1-145	chr1	64732796	64732944	64.4	5.93e-60	11.51	8.39e-30
chr1-1450	chr1	172481559	172481707	5.11	3.88e-05	14.47	3.43e-09
chr1-1452	chr1	172563630	172563778	27.6	8.29e-11	18.15	3.04e-09
chr1-1453	chr1	174964142	174964290	30.67	2.7e-12	39.16	2.52e-13
chr1-1454	chr1	175711990	175712138	12.27	4.23e-07	29.59	5.41e-10
chr1-1455	chr1	176948920	176949068	13.8	3.06e-08	24.96	1.98e-10
chr1-1456	chr1	176992681	176992829	30.67	2.7e-12	9.51	1.76e-07
chr1-1457	chr1	179177308	179177456	7.67	1.21e-06	24.65	2.21e-11
chr1-1458	chr1	179308214	179308362	15.33	2e-09	25.6	1.54e-11
chr1-1459	chr1	179935421	179935569	30.67	2.7e-12	31.7	1.96e-12
chr1-146	chr1	71035709	71035857	33.73	1.26e-50	62.32	4.14e-62
chr1-1464	chr1	182102761	182102909	15.33	2e-09	10.4	7.11e-08
chr1-1466	chr1	184786467	184786615	27.6	8.29e-11	20.66	1.01e-09
chr1-1468	chr1	185492636	185492784	30.67	2.7e-12	9.38	2e-07
chr1-1469	chr1	186763263	186763411	6.9	9.38e-06	23.04	3.94e-10
chr1-147	chr1	72242831	72242979	128.79	1.87e-72	30.39	1.47e-46
chr1-1470	chr1	187163754	187163902	27.6	8.29e-11	54.46	2.15e-13
chr1-1471	chr1	188886018	188886166	6.13	6.58e-05	18.36	2.08e-08
chr1-1475	chr1	191946408	191946556	6.9	9.38e-06	22.19	5.46e-10
chr1-1476	chr1	192750289	192750437	15.33	2e-09	17.99	4.45e-10
chr1-148	chr1	107978546	107978694	65.93	8.99e-62	58.42	1.5e-59
chr1-1480	chr1	3649156	3649304	12.27	4.23e-07	21.3	6.74e-09
chr1-1481	chr1	3947097	3947245	10.73	5.19e-06	29.12	7.23e-09
chr1-1482	chr1	4802682	4802830	6.13	6.58e-05	9.68	2.36e-06
chr1-1483	chr1	5228086	5228234	6.13	6.58e-05	10.87	1.02e-06
chr1-1484	chr1	7126168	7126316	27.6	8.29e-11	11.98	9.89e-08
chr1-1485	chr1	7542950	7543098	27.6	8.29e-11	35.24	9.86e-12
chr1-1486	chr1	8936057	8936205	24.53	2.29e-09	9.68	2.36e-06
chr1-1487	chr1	9848021	9848169	27.6	8.29e-11	23.96	2.81e-10
chr1-1488	chr1	10476805	10476953	24.53	2.29e-09	31.33	3.48e-10
chr1-149	chr1	153347911	153348059	131.86	1.42e-74	56.13	8.15e-59
chr1-1490	chr1	11351117	11351265	13.8	3.06e-08	23.96	2.81e-10
chr1-1491	chr1	13507030	13507178	24.53	2.29e-09	28.03	8.21e-10
chr1-1494	chr1	22519610	22519758	27.6	8.29e-11	54.46	2.15e-13
chr1-1495	chr1	24677751	24677899	13.8	3.06e-08	14.26	2.32e-08
chr1-1496	chr1	24741138	24741286	24.53	2.29e-09	44.38	2.31e-11
chr1-1498	chr1	30548465	30548613	24.53	2.29e-09	14.01	1.58e-07
chr1-1499	chr1	30883889	30884037	27.6	8.29e-11	37.44	5.8e-12
chr1-15	chr1	34007068	34007216	70.53	9.18e-133	39.01	1.5e-109
chr1-150	chr1	160310154	160310302	22.49	3.72e-43	30.2	1.42e-48
chr1-1501	chr1	33742695	33742843	27.6	8.29e-11	15.36	1.25e-08
chr1-1502	chr1	33814543	33814691	27.6	8.29e-11	27.23	9.31e-11
chr1-1504	chr1	33945025	33945173	12.27	4.23e-07	9.18	3.45e-06
chr1-1508	chr1	35822465	35822613	6.9	9.38e-06	13.62	3.43e-08
chr1-1509	chr1	36630551	36630699	6.9	9.38e-06	24.96	1.98e-10
chr1-151	chr1	185099089	185099237	65.93	8.99e-62	75.33	3.17e-64
chr1-1510	chr1	36784800	36784948	6.9	9.38e-06	19.33	1.78e-09
chr1-1511	chr1	36914554	36914702	12.27	4.23e-07	13.65	1.92e-07
chr1-1512	chr1	37130104	37130252	27.6	8.29e-11	16.19	8e-09
chr1-1513	chr1	37430031	37430179	6.13	6.58e-05	40.96	4.32e-11
chr1-1514	chr1	38618472	38618620	13.8	3.06e-08	7.78	3.63e-06
chr1-1516	chr1	39466112	39466260	24.53	2.29e-09	23.15	3.57e-09
chr1-1518	chr1	40304417	40304565	6.9	9.38e-06	11.3	1.6e-07
chr1-1519	chr1	40357926	40358074	13.8	3.06e-08	27.23	9.31e-11
chr1-152	chr1	4972416	4972564	64.4	5.93e-60	25.89	9.8e-44
chr1-1520	chr1	40665582	40665730	24.53	2.29e-09	19.02	1.6e-08
chr1-1521	chr1	40903203	40903351	27.6	8.29e-11	42.79	1.8e-12
chr1-1522	chr1	43899429	43899577	13.8	3.06e-08	22.19	5.46e-10
chr1-1524	chr1	45383816	45383964	27.6	8.29e-11	59.91	9.24e-14
chr1-1526	chr1	48678448	48678596	12.27	4.23e-07	44.38	2.31e-11
chr1-1527	chr1	50704798	50704946	24.53	2.29e-09	44.38	2.31e-11
chr1-1528	chr1	51573560	51573708	6.13	6.58e-05	8.59	5.53e-06
chr1-1529	chr1	51636817	51636965	13.8	3.06e-08	33.28	1.63e-11
chr1-153	chr1	6449054	6449202	32.2	1.4e-47	27.96	4.35e-45
chr1-1530	chr1	52080612	52080760	13.8	3.06e-08	22.19	5.46e-10
chr1-1531	chr1	52844877	52845025	12.27	4.23e-07	20.48	9.09e-09
chr1-1532	chr1	53111759	53111907	13.8	3.06e-08	42.79	1.8e-12
chr1-1533	chr1	53191320	53191468	27.6	8.29e-11	31.53	2.6e-11
chr1-1534	chr1	53635766	53635914	27.6	8.29e-11	39.94	3.29e-12
chr1-1536	chr1	55226054	55226202	13.8	3.06e-08	35.24	9.86e-12
chr1-1537	chr1	55974286	55974434	13.8	3.06e-08	42.79	1.8e-12
chr1-1538	chr1	57009229	57009377	27.6	8.29e-11	49.93	4.63e-13
chr1-154	chr1	54443772	54443920	21.47	1.84e-40	57.06	8.79e-58
chr1-1540	chr1	57450081	57450229	6.13	6.58e-05	25.36	1.77e-09
chr1-1541	chr1	57998310	57998458	24.53	2.29e-09	14.01	1.58e-07
chr1-1543	chr1	59438085	59438233	12.27	4.23e-07	13.31	2.31e-07
chr1-1545	chr1	59604040	59604188	13.8	3.06e-08	17.12	5e-09
chr1-1546	chr1	59663812	59663960	12.27	4.23e-07	11.83	5.5e-07
chr1-1547	chr1	59684829	59684977	10.73	5.19e-06	12.94	1.56e-06
chr1-1548	chr1	60432542	60432690	27.6	8.29e-11	27.23	9.31e-11
chr1-155	chr1	105071147	105071295	65.93	8.99e-62	75.33	3.17e-64
chr1-1550	chr1	62950207	62950355	27.6	8.29e-11	33.28	1.63e-11
chr1-1551	chr1	62986458	62986606	6.9	9.38e-06	22.19	5.46e-10
chr1-1555	chr1	63937776	63937924	27.6	8.29e-11	39.94	3.29e-12
chr1-1556	chr1	64343667	64343815	24.53	2.29e-09	44.38	2.31e-11
chr1-1557	chr1	66427897	66428045	13.8	3.06e-08	99.85	9.89e-16
chr1-1558	chr1	70475535	70475683	13.8	3.06e-08	31.53	2.6e-11
chr1-1559	chr1	71037085	71037233	6.13	6.58e-05	6.74	3.42e-05
chr1-156	chr1	119347871	119348019	32.97	4.25e-49	21.68	1.45e-41
chr1-1560	chr1	71184046	71184194	24.53	2.29e-09	53.25	5.54e-12
chr1-1562	chr1	72793317	72793465	27.6	8.29e-11	9.51	6.52e-07
chr1-1563	chr1	72867609	72867757	27.6	8.29e-11	9.66	5.73e-07
chr1-1564	chr1	72949340	72949488	27.6	8.29e-11	14.26	2.32e-08
chr1-1565	chr1	74506292	74506440	12.27	4.23e-07	6.92	2.86e-05
chr1-1569	chr1	75425830	75425978	24.53	2.29e-09	12.1	4.67e-07
chr1-157	chr1	156961508	156961656	32.97	4.25e-49	73.4	9.55e-64
chr1-1570	chr1	75583069	75583217	24.53	2.29e-09	22.19	4.94e-09
chr1-1571	chr1	75598639	75598787	24.53	2.29e-09	6.05	7.21e-05
chr1-1572	chr1	76907733	76907881	13.8	3.06e-08	46.09	9.37e-13
chr1-1573	chr1	77442111	77442259	12.27	4.23e-07	7.72	1.32e-05
chr1-1574	chr1	77475926	77476074	27.6	8.29e-11	7.68	4.02e-06
chr1-1575	chr1	77972376	77972524	13.8	3.06e-08	37.44	5.8e-12
chr1-1576	chr1	78508889	78509037	6.9	9.38e-06	13.62	3.43e-08
chr1-1578	chr1	80391077	80391225	24.53	2.29e-09	76.08	3.34e-13
chr1-1579	chr1	81137853	81138001	27.6	8.29e-11	54.46	2.15e-13
chr1-158	chr1	164019904	164020052	32.97	4.25e-49	69.81	7.96e-63
chr1-1580	chr1	83535132	83535280	6.9	9.38e-06	18.72	2.34e-09
chr1-1581	chr1	84271210	84271358	12.27	4.23e-07	35.5	1.32e-10
chr1-1583	chr1	85933706	85933854	21.47	5.62e-08	11.37	3.6e-06
chr1-1584	chr1	85993692	85993840	24.53	2.29e-09	20.48	9.09e-09
chr1-1585	chr1	86007900	86008048	13.8	3.06e-08	29.96	4.07e-11
chr1-1587	chr1	86471552	86471700	13.8	3.06e-08	7.78	3.63e-06
chr1-159	chr1	182181850	182181998	29.13	1.3e-41	42.16	1.5e-47
chr1-1591	chr1	87307842	87307990	6.13	6.58e-05	15.66	6.89e-08
chr1-1593	chr1	88700561	88700709	6.13	6.58e-05	9.51	2.68e-06
chr1-1594	chr1	88702831	88702979	13.8	3.06e-08	8.1	2.64e-06
chr1-1595	chr1	88957199	88957347	13.8	3.06e-08	13.93	2.83e-08
chr1-1596	chr1	90353393	90353541	6.13	6.58e-05	21.3	6.74e-09
chr1-1597	chr1	90460734	90460882	24.53	2.29e-09	22.19	4.94e-09
chr1-1598	chr1	90475156	90475304	21.47	5.62e-08	13.71	1.08e-06
chr1-1599	chr1	90571619	90571767	6.13	6.58e-05	21.3	6.74e-09
chr1-16	chr1	188854342	188854490	69	4.52e-129	124.81	5.41e-152
chr1-160	chr1	55186947	55187095	32.2	1.4e-47	84.72	6.88e-65
chr1-1601	chr1	92348906	92349054	27.6	8.29e-11	11.75	1.16e-07
chr1-1603	chr1	93635716	93635864	12.27	4.23e-07	23.15	3.57e-09
chr1-1604	chr1	93803731	93803879	6.9	9.38e-06	11.52	1.37e-07
chr1-1605	chr1	94546738	94546886	12.27	4.23e-07	53.25	5.54e-12
chr1-1606	chr1	97647165	97647313	6.13	6.58e-05	40.96	4.32e-11
chr1-1608	chr1	99970894	99971042	24.53	2.29e-09	23.15	3.57e-09
chr1-1609	chr1	103471700	103471848	13.8	3.06e-08	9.82	5.02e-07
chr1-161	chr1	62181813	62181961	20.95	3.96e-39	46.26	8.75e-53
chr1-1610	chr1	105523388	105523536	12.27	4.23e-07	10.65	1.19e-06
chr1-1611	chr1	106222047	106222195	24.53	2.29e-09	16.64	4.37e-08
chr1-1612	chr1	106751338	106751486	24.53	2.29e-09	40.96	4.32e-11
chr1-1613	chr1	107098729	107098877	13.8	3.06e-08	85.59	3.9e-15
chr1-1615	chr1	109328231	109328379	21.47	5.62e-08	22.19	4.5e-08
chr1-1616	chr1	112779804	112779952	12.27	4.23e-07	26.63	1.22e-09
chr1-1617	chr1	117650412	117650560	24.53	2.29e-09	53.25	5.54e-12
chr1-1618	chr1	118663197	118663345	12.27	4.23e-07	28.03	8.21e-10
chr1-162	chr1	74111406	74111554	15.72	2.78e-34	43.32	1.21e-51
chr1-1620	chr1	119954828	119954976	13.8	3.06e-08	49.93	4.63e-13
chr1-1621	chr1	120074430	120074578	6.9	9.38e-06	10.7	2.51e-07
chr1-1623	chr1	120605653	120605801	24.53	2.29e-09	11.09	8.81e-07
chr1-1624	chr1	121097231	121097379	13.8	3.06e-08	16.19	8e-09
chr1-1625	chr1	121292558	121292706	27.6	8.29e-11	66.57	3.63e-14
chr1-1626	chr1	131338881	131339029	12.27	4.23e-07	31.33	3.48e-10
chr1-1627	chr1	131478996	131479144	6.13	6.58e-05	17.18	3.44e-08
chr1-163	chr1	77472758	77472906	31.43	4.51e-46	44.74	3.33e-52
chr1-1633	chr1	133973935	133974083	24.53	2.29e-09	18.36	2.08e-08
chr1-1634	chr1	134046051	134046199	6.13	6.58e-05	18.36	2.08e-08
chr1-1636	chr1	134494534	134494682	13.8	3.06e-08	9.99	4.39e-07
chr1-1639	chr1	134563667	134563815	27.6	8.29e-11	7.99	2.94e-06
chr1-164	chr1	98086568	98086716	20.95	3.96e-39	69.98	5.02e-60
chr1-1643	chr1	135719577	135719725	6.9	9.38e-06	14.61	1.9e-08
chr1-1646	chr1	136596944	136597092	24.53	2.29e-09	12.99	2.77e-07
chr1-1648	chr1	136733389	136733537	21.47	5.62e-08	7.17	6.32e-05
chr1-1649	chr1	136738172	136738320	6.9	9.38e-06	12.23	8.37e-08
chr1-165	chr1	106564535	106564683	119.6	3.71e-66	39.94	7.29e-48
chr1-1650	chr1	148481427	148481575	24.53	2.29e-09	26.63	1.22e-09
chr1-1651	chr1	149430946	149431094	24.53	2.29e-09	66.57	9.57e-13
chr1-1652	chr1	151079010	151079158	6.9	9.38e-06	20.66	1.01e-09
chr1-1654	chr1	151571041	151571189	13.8	3.06e-08	17.12	5e-09
chr1-1655	chr1	151737283	151737431	12.27	4.23e-07	38.04	7.69e-11
chr1-1656	chr1	151883463	151883611	12.27	4.23e-07	7.95	1.07e-05
chr1-1659	chr1	152832375	152832523	13.8	3.06e-08	9.99	4.39e-07
chr1-166	chr1	119497681	119497829	62.86	3.82e-58	52.49	5.48e-55
chr1-1661	chr1	153073267	153073415	24.53	2.29e-09	10.24	1.57e-06
chr1-1664	chr1	154723607	154723755	13.8	3.06e-08	18.72	2.34e-09
chr1-1665	chr1	154820080	154820228	24.53	2.29e-09	38.04	7.69e-11
chr1-1666	chr1	155052742	155052890	27.6	8.29e-11	9.66	5.73e-07
chr1-1667	chr1	155241211	155241359	27.6	8.29e-11	17.12	5e-09
chr1-1668	chr1	155973252	155973400	6.9	9.38e-06	29.96	4.07e-11
chr1-1669	chr1	156076662	156076810	13.8	3.06e-08	10.7	2.51e-07
chr1-167	chr1	132237820	132237968	20.95	3.96e-39	85.29	1.68e-63
chr1-1671	chr1	159231994	159232142	24.53	2.29e-09	28.03	8.21e-10
chr1-1672	chr1	159494010	159494158	24.53	2.29e-09	38.04	7.69e-11
chr1-1674	chr1	160416262	160416410	24.53	2.29e-09	31.33	3.48e-10
chr1-1677	chr1	161254331	161254479	27.6	8.29e-11	11.09	1.86e-07
chr1-1678	chr1	161286821	161286969	27.6	8.29e-11	26.05	1.37e-10
chr1-1679	chr1	161618572	161618720	12.27	4.23e-07	28.03	8.21e-10
chr1-168	chr1	153093278	153093426	62.86	3.82e-58	9.89	1.11e-26
chr1-1681	chr1	164577380	164577528	6.13	6.58e-05	14.01	1.58e-07
chr1-1682	chr1	165743625	165743773	13.8	3.06e-08	59.91	9.24e-14
chr1-1686	chr1	167860539	167860687	13.8	3.06e-08	99.85	9.89e-16
chr1-1687	chr1	168214192	168214340	12.27	4.23e-07	13.31	2.31e-07
chr1-1688	chr1	168396870	168397018	27.6	8.29e-11	12.48	7.06e-08
chr1-1689	chr1	171121965	171122113	6.9	9.38e-06	23.04	3.94e-10
chr1-169	chr1	170889498	170889646	61.33	2.4e-56	28.33	3.05e-43
chr1-1690	chr1	171137706	171137854	12.27	4.23e-07	33.28	2.17e-10
chr1-1693	chr1	171372922	171373070	13.8	3.06e-08	13.93	2.83e-08
chr1-1694	chr1	171453065	171453213	6.9	9.38e-06	22.19	5.46e-10
chr1-1697	chr1	172520817	172520965	24.53	2.29e-09	7.83	1.19e-05
chr1-1698	chr1	172657459	172657607	24.53	2.29e-09	21.3	6.74e-09
chr1-1699	chr1	173398733	173398881	6.13	6.58e-05	48.41	1.17e-11
chr1-17	chr1	126129276	126129424	137.99	6.9e-156	206.59	1.45e-171
chr1-170	chr1	179604621	179604769	59.8	1.47e-54	89.52	2.68e-61
chr1-1700	chr1	173420469	173420617	6.13	6.58e-05	8.45	6.2e-06
chr1-1701	chr1	176344139	176344287	24.53	2.29e-09	38.04	7.69e-11
chr1-1702	chr1	178850010	178850158	6.9	9.38e-06	6.51	1.47e-05
chr1-1703	chr1	179112296	179112444	13.8	3.06e-08	20.66	1.01e-09
chr1-1704	chr1	179518232	179518380	10.73	5.19e-06	11.37	3.6e-06
chr1-1705	chr1	180210725	180210873	27.6	8.29e-11	19.33	1.78e-09
chr1-1707	chr1	180725916	180726064	6.13	6.58e-05	19.02	1.6e-08
chr1-171	chr1	3681569	3681717	119.6	3.71e-66	63.32	1.64e-55
chr1-1712	chr1	181251003	181251151	27.6	8.29e-11	19.97	1.35e-09
chr1-1713	chr1	181386012	181386160	27.6	8.29e-11	31.53	2.6e-11
chr1-1714	chr1	181759225	181759373	6.13	6.58e-05	23.15	3.57e-09
chr1-1715	chr1	181845324	181845472	27.6	8.29e-11	14.26	2.32e-08
chr1-1716	chr1	185193703	185193851	27.6	8.29e-11	18.72	2.34e-09
chr1-1719	chr1	185488818	185488966	12.27	4.23e-07	7.61	1.46e-05
chr1-172	chr1	9443083	9443231	122.66	3.03e-68	156.63	1.84e-72
chr1-1720	chr1	187974588	187974736	13.8	3.06e-08	28.53	6.22e-11
chr1-1721	chr1	189179179	189179327	13.8	3.06e-08	33.28	1.63e-11
chr1-1722	chr1	190169031	190169179	12.27	4.23e-07	9.51	2.68e-06
chr1-1723	chr1	190169592	190169740	12.27	4.23e-07	8.45	6.2e-06
chr1-1725	chr1	191143830	191143978	24.53	2.29e-09	38.04	7.69e-11
chr1-1726	chr1	191165851	191165999	24.53	2.29e-09	53.25	5.54e-12
chr1-1727	chr1	191661107	191661255	13.8	3.06e-08	6.89	9.53e-06
chr1-1728	chr1	191802178	191802326	12.27	4.23e-07	15.22	8.56e-08
chr1-173	chr1	13084975	13085123	122.66	3.03e-68	24.65	6.42e-41
chr1-1730	chr1	193102065	193102213	27.6	8.29e-11	39.94	3.29e-12
chr1-1731	chr1	193374041	193374189	13.8	3.06e-08	17.62	3.91e-09
chr1-1733	chr1	193672540	193672688	27.6	8.29e-11	33.28	1.63e-11
chr1-1734	chr1	193755867	193756015	27.6	8.29e-11	99.85	9.89e-16
chr1-1735	chr1	193897223	193897371	24.53	2.29e-09	29.59	5.41e-10
chr1-1738	chr1	3340820	3340968	24.53	2.29e-09	18.36	2.08e-08
chr1-1739	chr1	5262405	5262553	6.13	6.58e-05	9.34	3.04e-06
chr1-174	chr1	86488887	86489035	15.33	4.38e-33	20.33	1.04e-37
chr1-1742	chr1	8539222	8539370	24.53	2.29e-09	29.59	5.41e-10
chr1-1744	chr1	11097341	11097489	6.13	6.58e-05	10.87	1.02e-06
chr1-1745	chr1	11149581	11149729	12.27	4.23e-07	15.22	8.56e-08
chr1-1747	chr1	11423891	11424039	12.27	4.23e-07	28.03	8.21e-10
chr1-1748	chr1	12020813	12020961	21.47	5.62e-08	58.25	6.37e-11
chr1-1749	chr1	12679349	12679497	10.73	5.19e-06	14.56	7.28e-07
chr1-175	chr1	101757287	101757435	58.26	8.8e-53	57.49	1.45e-52
chr1-1750	chr1	12710794	12710942	12.27	4.23e-07	16.14	5.51e-08
chr1-1751	chr1	13018587	13018735	10.73	5.19e-06	13.31	1.3e-06
chr1-1756	chr1	13614721	13614869	6.13	6.58e-05	21.3	6.74e-09
chr1-1757	chr1	13789304	13789452	12.27	4.23e-07	21.3	6.74e-09
chr1-1758	chr1	14189700	14189848	10.73	5.19e-06	19.42	1.1e-07
chr1-1759	chr1	16116546	16116694	24.53	2.29e-09	13.65	1.92e-07
chr1-176	chr1	105095183	105095331	59.8	1.47e-54	49.93	1.47e-51
chr1-1760	chr1	18831178	18831326	6.13	6.58e-05	48.41	1.17e-11
chr1-1762	chr1	21231761	21231909	10.73	5.19e-06	25.89	1.6e-08
chr1-1763	chr1	23372831	23372979	24.53	2.29e-09	25.36	1.77e-09
chr1-1765	chr1	23971254	23971402	10.73	5.19e-06	9.91	8.57e-06
chr1-1766	chr1	24433147	24433295	24.53	2.29e-09	59.17	2.42e-12
chr1-1768	chr1	25888125	25888273	10.73	5.19e-06	20.26	8.26e-08
chr1-1769	chr1	30920779	30920927	12.27	4.23e-07	26.63	1.22e-09
chr1-177	chr1	136569908	136570056	20.44	8.32e-38	14.47	3.81e-32
chr1-1770	chr1	30949794	30949942	24.53	2.29e-09	16.14	5.51e-08
chr1-1771	chr1	33925443	33925591	10.73	5.19e-06	10.59	5.65e-06
chr1-1772	chr1	34038635	34038783	9.2	5.57e-05	9.74	4.1e-05
chr1-1775	chr1	34116377	34116525	12.27	4.23e-07	13.31	2.31e-07
chr1-1776	chr1	34402172	34402320	12.27	4.23e-07	17.18	3.44e-08
chr1-1777	chr1	34402657	34402805	6.13	6.58e-05	16.64	4.37e-08
chr1-1779	chr1	34635093	34635241	12.27	4.23e-07	53.25	5.54e-12
chr1-178	chr1	152573245	152573393	119.6	3.71e-66	51.92	3.29e-52
chr1-1780	chr1	34853134	34853282	24.53	2.29e-09	19.02	1.6e-08
chr1-1781	chr1	34962374	34962522	12.27	4.23e-07	25.36	1.77e-09
chr1-1782	chr1	35810909	35811057	10.73	5.19e-06	24.52	2.3e-08
chr1-1783	chr1	35884186	35884334	10.73	5.19e-06	14.56	7.28e-07
chr1-1784	chr1	36646104	36646252	24.53	2.29e-09	20.48	9.09e-09
chr1-1785	chr1	36767553	36767701	6.13	6.58e-05	9.86	2.07e-06
chr1-1786	chr1	37240874	37241022	24.53	2.29e-09	20.48	9.09e-09
chr1-1787	chr1	37338521	37338669	21.47	5.62e-08	35.84	1.77e-09
chr1-1788	chr1	37543124	37543272	10.73	5.19e-06	16.07	3.82e-07
chr1-1789	chr1	37671360	37671508	6.13	6.58e-05	15.22	8.56e-08
chr1-179	chr1	7313562	7313710	59.8	1.47e-54	44.76	9.52e-50
chr1-1790	chr1	38969664	38969812	21.47	5.62e-08	33.28	2.93e-09
chr1-1792	chr1	39643379	39643527	24.53	2.29e-09	24.21	2.54e-09
chr1-1793	chr1	41384813	41384961	24.53	2.29e-09	38.04	7.69e-11
chr1-1795	chr1	43820118	43820266	24.53	2.29e-09	10.44	1.37e-06
chr1-1796	chr1	43899115	43899263	12.27	4.23e-07	18.36	2.08e-08
chr1-1798	chr1	44990969	44991117	21.47	5.62e-08	31.06	4.67e-09
chr1-1799	chr1	45827041	45827189	10.73	5.19e-06	29.12	7.23e-09
chr1-18	chr1	59376556	59376704	33.35	6.12e-98	49.08	3.51e-112
chr1-180	chr1	34073879	34074027	29.13	1.3e-41	13.38	2.01e-29
chr1-1801	chr1	46921594	46921742	10.73	5.19e-06	23.3	3.25e-08
chr1-1802	chr1	48651824	48651972	24.53	2.29e-09	7.5	1.62e-05
chr1-1804	chr1	51273720	51273868	21.47	5.62e-08	15.03	5.92e-07
chr1-1805	chr1	51429863	51430011	10.73	5.19e-06	24.52	2.3e-08
chr1-1807	chr1	51597132	51597280	24.53	2.29e-09	29.59	5.41e-10
chr1-1808	chr1	52049748	52049896	12.27	4.23e-07	18.36	2.08e-08
chr1-1809	chr1	52051697	52051845	6.13	6.58e-05	16.64	4.37e-08
chr1-181	chr1	98073232	98073380	119.6	3.71e-66	44	1.83e-49
chr1-1810	chr1	53838259	53838407	21.47	5.62e-08	19.42	1.1e-07
chr1-1812	chr1	55194605	55194753	24.53	2.29e-09	7.5	1.62e-05
chr1-1813	chr1	55491635	55491783	21.47	5.62e-08	23.3	3.25e-08
chr1-1815	chr1	56975603	56975751	21.47	5.62e-08	8.03	3.16e-05
chr1-1816	chr1	57293535	57293683	24.53	2.29e-09	21.3	6.74e-09
chr1-1817	chr1	57858137	57858285	21.47	5.62e-08	22.19	4.5e-08
chr1-1818	chr1	57890288	57890436	10.73	5.19e-06	15.53	4.77e-07
chr1-1819	chr1	58251124	58251272	24.53	2.29e-09	33.28	2.17e-10
chr1-182	chr1	110790732	110790880	119.6	3.71e-66	118.01	6.22e-66
chr1-1821	chr1	58346231	58346379	6.13	6.58e-05	24.21	2.54e-09
chr1-1823	chr1	58424641	58424789	6.13	6.58e-05	16.14	5.51e-08
chr1-1826	chr1	58711355	58711503	12.27	4.23e-07	22.19	4.94e-09
chr1-1829	chr1	60076957	60077105	12.27	4.23e-07	17.75	2.69e-08
chr1-183	chr1	158386976	158387124	116.53	4.44e-64	87.23	2.4e-59
chr1-1832	chr1	61408565	61408713	21.47	5.62e-08	24.52	2.3e-08
chr1-1833	chr1	61933692	61933840	24.53	2.29e-09	44.38	2.31e-11
chr1-1836	chr1	63176653	63176801	12.27	4.23e-07	10.65	1.19e-06
chr1-1838	chr1	63953612	63953760	10.73	5.19e-06	24.52	2.3e-08
chr1-1839	chr1	64226404	64226552	6.13	6.58e-05	15.22	8.56e-08
chr1-1840	chr1	64918902	64919050	24.53	2.29e-09	19.02	1.6e-08
chr1-1842	chr1	64958967	64959115	21.47	5.62e-08	11.95	2.62e-06
chr1-1843	chr1	65329875	65330023	10.73	5.19e-06	66.57	2.54e-11
chr1-1844	chr1	68333802	68333950	12.27	4.23e-07	53.25	5.54e-12
chr1-1845	chr1	68590009	68590157	24.53	2.29e-09	59.17	2.42e-12
chr1-1846	chr1	71244813	71244961	24.53	2.29e-09	14.79	1.06e-07
chr1-185	chr1	20954961	20955109	59.8	1.47e-54	60.38	1.02e-54
chr1-1852	chr1	72248223	72248371	24.53	2.29e-09	7.95	1.07e-05
chr1-1854	chr1	73088516	73088664	12.27	4.23e-07	14.39	1.3e-07
chr1-1859	chr1	74361928	74362076	12.27	4.23e-07	16.64	4.37e-08
chr1-186	chr1	76029206	76029354	56.73	5.13e-51	55.98	8.34e-51
chr1-1863	chr1	74713172	74713320	10.73	5.19e-06	21.18	6.14e-08
chr1-1864	chr1	74830252	74830400	12.27	4.23e-07	17.18	3.44e-08
chr1-1869	chr1	75518061	75518209	6.13	6.58e-05	10.65	1.19e-06
chr1-187	chr1	120354516	120354664	116.53	4.44e-64	76.65	3.06e-57
chr1-1870	chr1	75565659	75565807	10.73	5.19e-06	21.18	6.14e-08
chr1-1874	chr1	78143511	78143659	21.47	5.62e-08	15.03	5.92e-07
chr1-1875	chr1	78602114	78602262	12.27	4.23e-07	12.1	4.67e-07
chr1-1876	chr1	78613558	78613706	12.27	4.23e-07	28.03	8.21e-10
chr1-1877	chr1	80667698	80667846	21.47	5.62e-08	46.6	2.95e-10
chr1-1878	chr1	84839359	84839507	10.73	5.19e-06	8.47	2.28e-05
chr1-188	chr1	120759520	120759668	28.37	3.8e-40	39.1	3.67e-45
chr1-1883	chr1	85793333	85793481	6.13	6.58e-05	22.19	4.94e-09
chr1-1886	chr1	87246177	87246325	12.27	4.23e-07	44.38	2.31e-11
chr1-1889	chr1	88639500	88639648	6.13	6.58e-05	14.39	1.3e-07
chr1-189	chr1	124174881	124175029	113.46	5.17e-62	87.96	5.79e-58
chr1-1890	chr1	89109951	89110099	10.73	5.19e-06	10.13	7.48e-06
chr1-1892	chr1	89870254	89870402	6.13	6.58e-05	7.01	2.61e-05
chr1-1894	chr1	90405280	90405428	10.73	5.19e-06	16.64	3.04e-07
chr1-1895	chr1	90505215	90505363	6.13	6.58e-05	12.68	3.31e-07
chr1-1896	chr1	90519558	90519706	6.13	6.58e-05	14.39	1.3e-07
chr1-1897	chr1	91043375	91043523	24.53	2.29e-09	8.07	8.59e-06
chr1-1898	chr1	91778388	91778536	24.53	2.29e-09	26.63	1.22e-09
chr1-1899	chr1	92113837	92113985	18.4	1.21e-06	17.37	1.67e-06
chr1-19	chr1	74825096	74825244	65.93	9.57e-122	63.61	1.99e-120
chr1-190	chr1	132201003	132201151	119.6	3.71e-66	23.18	6.17e-39
chr1-1900	chr1	92183404	92183552	6.13	6.58e-05	10.44	1.37e-06
chr1-1901	chr1	92888994	92889142	12.27	4.23e-07	33.28	2.17e-10
chr1-1902	chr1	92895185	92895333	6.13	6.58e-05	48.41	1.17e-11
chr1-1904	chr1	95667487	95667635	6.13	6.58e-05	15.66	6.89e-08
chr1-1905	chr1	95751298	95751446	12.27	4.23e-07	15.22	8.56e-08
chr1-1906	chr1	99710633	99710781	24.53	2.29e-09	31.33	3.48e-10
chr1-1907	chr1	100505238	100505386	6.13	6.58e-05	33.28	2.17e-10
chr1-1908	chr1	105071803	105071951	12.27	4.23e-07	7.2	2.17e-05
chr1-1909	chr1	105990138	105990286	10.73	5.19e-06	10.84	4.88e-06
chr1-191	chr1	133209147	133209295	18.91	6.61e-34	48.29	1.77e-48
chr1-1910	chr1	113103636	113103784	24.53	2.29e-09	66.57	9.57e-13
chr1-1911	chr1	114641640	114641788	10.73	5.19e-06	9.32	1.26e-05
chr1-1912	chr1	116070307	116070455	24.53	2.29e-09	88.76	9.87e-14
chr1-1913	chr1	116582673	116582821	24.53	2.29e-09	133.14	3.97e-15
chr1-1916	chr1	118590048	118590196	10.73	5.19e-06	23.3	3.25e-08
chr1-1917	chr1	118597704	118597852	21.47	5.62e-08	19.42	1.1e-07
chr1-192	chr1	157459069	157459217	116.53	4.44e-64	51.62	8.04e-51
chr1-1920	chr1	119335136	119335284	24.53	2.29e-09	15.66	6.89e-08
chr1-1922	chr1	119548812	119548960	6.13	6.58e-05	17.18	3.44e-08
chr1-1924	chr1	120338108	120338256	24.53	2.29e-09	14.79	1.06e-07
chr1-1925	chr1	120342444	120342592	6.13	6.58e-05	14.79	1.06e-07
chr1-1926	chr1	125424867	125425015	21.47	5.62e-08	12.59	1.87e-06
chr1-1927	chr1	125435929	125436077	10.73	5.19e-06	13.71	1.08e-06
chr1-1929	chr1	130715878	130716026	6.13	6.58e-05	12.68	3.31e-07
chr1-193	chr1	35698017	35698165	55.2	2.91e-49	82.64	1.77e-55
chr1-1931	chr1	131026348	131026496	12.27	4.23e-07	20.48	9.09e-09
chr1-1932	chr1	131562197	131562345	21.47	5.62e-08	33.28	2.93e-09
chr1-1934	chr1	131820809	131820957	12.27	4.23e-07	14.79	1.06e-07
chr1-1935	chr1	131849596	131849744	24.53	2.29e-09	19.72	1.21e-08
chr1-1938	chr1	132139675	132139823	12.27	4.23e-07	13.31	2.31e-07
chr1-194	chr1	36484460	36484608	19.42	3.4e-35	101.18	9.04e-62
chr1-1943	chr1	132660560	132660708	10.73	5.19e-06	13.71	1.08e-06
chr1-1944	chr1	132720219	132720367	12.27	4.23e-07	40.96	4.32e-11
chr1-1945	chr1	132934994	132935142	6.13	6.58e-05	20.48	9.09e-09
chr1-1946	chr1	133047757	133047905	21.47	5.62e-08	8.32	2.55e-05
chr1-1947	chr1	133265495	133265643	10.73	5.19e-06	15.03	5.92e-07
chr1-1949	chr1	133448575	133448723	21.47	5.62e-08	9.91	8.57e-06
chr1-195	chr1	37101862	37102010	19.42	3.4e-35	70.27	7.98e-56
chr1-1953	chr1	133742049	133742197	24.53	2.29e-09	13.31	2.31e-07
chr1-1954	chr1	134086156	134086304	6.13	6.58e-05	14.79	1.06e-07
chr1-1955	chr1	134423988	134424136	12.27	4.23e-07	10.87	1.02e-06
chr1-1957	chr1	134610773	134610921	21.47	5.62e-08	22.19	4.5e-08
chr1-196	chr1	62398366	62398514	113.46	5.17e-62	164.2	6.58e-68
chr1-1960	chr1	135193444	135193592	12.27	4.23e-07	10.87	1.02e-06
chr1-1961	chr1	135544889	135545037	12.27	4.23e-07	24.21	2.54e-09
chr1-1964	chr1	136165666	136165814	24.53	2.29e-09	16.64	4.37e-08
chr1-1968	chr1	137297871	137298019	12.27	4.23e-07	40.96	4.32e-11
chr1-1969	chr1	137418476	137418624	12.27	4.23e-07	40.96	4.32e-11
chr1-197	chr1	75588939	75589087	18.4	1.25e-32	42.04	4.28e-45
chr1-1970	chr1	138205883	138206031	9.2	5.57e-05	19.02	9.99e-07
chr1-1972	chr1	138938167	138938315	24.53	2.29e-09	29.59	5.41e-10
chr1-1973	chr1	139405281	139405429	21.47	5.62e-08	25.89	1.6e-08
chr1-1974	chr1	143073823	143073971	24.53	2.29e-09	59.17	2.42e-12
chr1-1977	chr1	147457084	147457232	21.47	5.62e-08	51.77	1.43e-10
chr1-1979	chr1	150623293	150623441	10.73	5.19e-06	31.06	4.67e-09
chr1-198	chr1	134535179	134535327	113.46	5.17e-62	37.32	1.96e-44
chr1-1980	chr1	150824683	150824831	24.53	2.29e-09	76.08	3.34e-13
chr1-1981	chr1	151066847	151066995	12.27	4.23e-07	29.59	5.41e-10
chr1-1982	chr1	151305063	151305211	21.47	5.62e-08	19.42	1.1e-07
chr1-1984	chr1	152102214	152102362	24.53	2.29e-09	59.17	2.42e-12
chr1-199	chr1	136613295	136613443	113.46	5.17e-62	54.73	1.89e-50
chr1-1990	chr1	153333125	153333273	12.27	4.23e-07	15.22	8.56e-08
chr1-1991	chr1	153424866	153425014	6.13	6.58e-05	15.22	8.56e-08
chr1-1993	chr1	155056311	155056459	12.27	4.23e-07	8.88	4.39e-06
chr1-1994	chr1	155086460	155086608	6.13	6.58e-05	11.09	8.81e-07
chr1-1995	chr1	156035903	156036051	18.4	1.21e-06	9.08	5.98e-05
chr1-1997	chr1	156660527	156660675	12.27	4.23e-07	9.86	2.07e-06
chr1-1999	chr1	156920606	156920754	24.53	2.29e-09	29.59	5.41e-10
chr1-2	chr1	72229096	72229244	109.63	2.27e-232	63.04	2.01e-198
chr1-20	chr1	59423314	59423462	248.39	4.75e-161	32.1	5.25e-90
chr1-200	chr1	178338191	178338339	113.46	5.17e-62	35.19	1.68e-43
chr1-2000	chr1	156956440	156956588	12.27	4.23e-07	20.48	9.09e-09
chr1-2001	chr1	157070279	157070427	12.27	4.23e-07	21.3	6.74e-09
chr1-2002	chr1	157804147	157804295	24.53	2.29e-09	44.38	2.31e-11
chr1-2003	chr1	158204665	158204813	24.53	2.29e-09	19.02	1.6e-08
chr1-2004	chr1	159018283	159018431	21.47	5.62e-08	31.06	4.67e-09
chr1-2006	chr1	160363554	160363702	6.13	6.58e-05	38.04	7.69e-11
chr1-2007	chr1	160655224	160655372	24.53	2.29e-09	10.65	1.19e-06
chr1-2008	chr1	161451845	161451993	21.47	5.62e-08	9.14	1.43e-05
chr1-201	chr1	188998777	188998925	110.4	5.87e-60	20.31	4.28e-34
chr1-2010	chr1	165184341	165184489	24.53	2.29e-09	28.03	8.21e-10
chr1-2011	chr1	165194392	165194540	21.47	5.62e-08	12.94	1.56e-06
chr1-2012	chr1	165320657	165320805	12.27	4.23e-07	19.02	1.6e-08
chr1-2013	chr1	165563411	165563559	24.53	2.29e-09	26.63	1.22e-09
chr1-2015	chr1	166003247	166003395	12.27	4.23e-07	7.5	1.62e-05
chr1-2019	chr1	167350177	167350325	12.27	4.23e-07	19.72	1.21e-08
chr1-202	chr1	10878378	10878526	27.6	1.08e-38	38.04	1.44e-43
chr1-2021	chr1	167571930	167572078	6.13	6.58e-05	33.28	2.17e-10
chr1-2022	chr1	167652460	167652608	10.73	5.19e-06	23.3	3.25e-08
chr1-2023	chr1	168395638	168395786	6.13	6.58e-05	10.44	1.37e-06
chr1-2024	chr1	168550209	168550357	10.73	5.19e-06	29.12	7.23e-09
chr1-2025	chr1	170793477	170793625	24.53	2.29e-09	20.48	9.09e-09
chr1-2026	chr1	171088464	171088612	6.13	6.58e-05	6.83	3.13e-05
chr1-203	chr1	31233797	31233945	28.37	3.8e-40	76.97	7.63e-56
chr1-2032	chr1	171946683	171946831	6.13	6.58e-05	25.36	1.77e-09
chr1-2033	chr1	171971020	171971168	24.53	2.29e-09	26.63	1.22e-09
chr1-2034	chr1	172024246	172024394	24.53	2.29e-09	11.83	5.5e-07
chr1-2036	chr1	172217215	172217363	12.27	4.23e-07	14.79	1.06e-07
chr1-2039	chr1	173350114	173350262	21.47	5.62e-08	8.63	2.04e-05
chr1-204	chr1	34074551	34074699	110.4	5.87e-60	12.68	3.52e-27
chr1-2040	chr1	174655490	174655638	21.47	5.62e-08	31.06	4.67e-09
chr1-2041	chr1	178283397	178283545	24.53	2.29e-09	6.27	5.68e-05
chr1-2044	chr1	178368288	178368436	24.53	2.29e-09	13.65	1.92e-07
chr1-2046	chr1	178489207	178489355	12.27	4.23e-07	29.59	5.41e-10
chr1-2047	chr1	178748119	178748267	6.13	6.58e-05	20.48	9.09e-09
chr1-2048	chr1	179723641	179723789	6.13	6.58e-05	21.3	6.74e-09
chr1-205	chr1	71673605	71673753	107.33	6.48e-58	39.49	5.84e-43
chr1-2051	chr1	180196135	180196283	24.53	2.29e-09	21.3	6.74e-09
chr1-2053	chr1	180484111	180484259	12.27	4.23e-07	7.95	1.07e-05
chr1-2056	chr1	180777663	180777811	12.27	4.23e-07	15.66	6.89e-08
chr1-206	chr1	72255240	72255388	11.35	3.01e-26	61.58	2.6e-52
chr1-2063	chr1	182272138	182272286	12.27	4.23e-07	14.79	1.06e-07
chr1-2064	chr1	182323554	182323702	21.47	5.62e-08	17.92	1.86e-07
chr1-2067	chr1	183324576	183324724	12.27	4.23e-07	26.63	1.22e-09
chr1-2068	chr1	184097325	184097473	21.47	5.62e-08	31.06	4.67e-09
chr1-2069	chr1	184712591	184712739	24.53	2.29e-09	53.25	5.54e-12
chr1-207	chr1	73642868	73643016	110.4	5.87e-60	126.13	5.05e-62
chr1-2070	chr1	185955823	185955971	10.73	5.19e-06	13.71	1.08e-06
chr1-2071	chr1	186255883	186256031	12.27	4.23e-07	17.18	3.44e-08
chr1-2072	chr1	186954796	186954944	21.47	5.62e-08	10.13	7.48e-06
chr1-2073	chr1	187983246	187983394	12.27	4.23e-07	38.04	7.69e-11
chr1-2074	chr1	189875695	189875843	24.53	2.29e-09	21.3	6.74e-09
chr1-2075	chr1	189924011	189924159	21.47	5.62e-08	11.37	3.6e-06
chr1-2076	chr1	190784513	190784661	12.27	4.23e-07	40.96	4.32e-11
chr1-2077	chr1	191185053	191185201	12.27	4.23e-07	11.09	8.81e-07
chr1-2078	chr1	191190128	191190276	10.73	5.19e-06	11.95	2.62e-06
chr1-2079	chr1	191468923	191469071	6.13	6.58e-05	23.15	3.57e-09
chr1-208	chr1	113959421	113959569	107.33	6.48e-58	45.68	4.02e-45
chr1-2080	chr1	191726087	191726235	24.53	2.29e-09	29.59	5.41e-10
chr1-2081	chr1	191990174	191990322	10.73	5.19e-06	24.52	2.3e-08
chr1-2083	chr1	192542586	192542734	6.13	6.58e-05	44.38	2.31e-11
chr1-2084	chr1	192796552	192796700	12.27	4.23e-07	10.65	1.19e-06
chr1-2085	chr1	193273304	193273452	12.27	4.23e-07	21.3	6.74e-09
chr1-2088	chr1	194034340	194034488	12.27	4.23e-07	38.04	7.69e-11
chr1-2089	chr1	194976298	194976446	10.73	5.19e-06	18.64	1.44e-07
chr1-209	chr1	134570760	134570908	17.89	2.31e-31	26.48	4.68e-37
chr1-2091	chr1	3671689	3671837	9.2	5.57e-05	12.88	8.89e-06
chr1-2092	chr1	4780181	4780329	10.73	5.19e-06	21.18	6.14e-08
chr1-2093	chr1	4914410	4914558	9.2	5.57e-05	16.64	2.13e-06
chr1-2094	chr1	5020981	5021129	10.73	5.19e-06	7.4	5.24e-05
chr1-2096	chr1	7012620	7012768	21.47	5.62e-08	29.12	7.23e-09
chr1-2099	chr1	7543607	7543755	21.47	5.62e-08	23.3	3.25e-08
chr1-21	chr1	75804580	75804728	41.4	1.02e-98	92.97	1.03e-126
chr1-210	chr1	161877708	161877856	53.66	1.61e-47	51.77	5.5e-47
chr1-2100	chr1	7750235	7750383	21.47	5.62e-08	51.77	1.43e-10
chr1-2101	chr1	8557925	8558073	21.47	5.62e-08	19.42	1.1e-07
chr1-2102	chr1	8941558	8941706	10.73	5.19e-06	8.79	1.82e-05
chr1-2103	chr1	9364508	9364656	10.73	5.19e-06	77.66	8.76e-12
chr1-2106	chr1	10233102	10233250	10.73	5.19e-06	17.26	2.39e-07
chr1-2107	chr1	10380877	10381025	9.2	5.57e-05	28.53	9.74e-08
chr1-2109	chr1	11147611	11147759	21.47	5.62e-08	13.71	1.08e-06
chr1-2111	chr1	11251195	11251343	21.47	5.62e-08	17.26	2.39e-07
chr1-2113	chr1	12296113	12296261	18.4	1.21e-06	36.31	2.4e-08
chr1-2114	chr1	12683111	12683259	21.47	5.62e-08	15.03	5.92e-07
chr1-2115	chr1	12795804	12795952	21.47	5.62e-08	10.13	7.48e-06
chr1-2117	chr1	12998034	12998182	21.47	5.62e-08	20.26	8.26e-08
chr1-212	chr1	9955049	9955197	27.6	1.08e-38	36.87	4.29e-43
chr1-2120	chr1	13465306	13465454	10.73	5.19e-06	15.03	5.92e-07
chr1-2121	chr1	13494727	13494875	18.4	1.21e-06	19.97	7.56e-07
chr1-2123	chr1	13620387	13620535	21.47	5.62e-08	13.31	1.3e-06
chr1-2124	chr1	13749025	13749173	21.47	5.62e-08	66.57	2.54e-11
chr1-2125	chr1	13784494	13784642	9.2	5.57e-05	13.31	7.41e-06
chr1-2126	chr1	14177195	14177343	10.73	5.19e-06	19.42	1.1e-07
chr1-213	chr1	22377351	22377499	110.4	5.87e-60	46.99	8.55e-47
chr1-2130	chr1	16112039	16112187	18.4	1.21e-06	9.51	4.66e-05
chr1-2132	chr1	17207608	17207756	10.73	5.19e-06	23.3	3.25e-08
chr1-2133	chr1	17235528	17235676	18.4	1.21e-06	12.88	8.89e-06
chr1-2134	chr1	17426854	17427002	21.47	5.62e-08	46.6	2.95e-10
chr1-2135	chr1	19109766	19109914	10.73	5.19e-06	9.14	1.43e-05
chr1-2137	chr1	21166296	21166444	10.73	5.19e-06	15.03	5.92e-07
chr1-2139	chr1	21805163	21805311	9.2	5.57e-05	23.49	2.98e-07
chr1-214	chr1	26229844	26229992	52.13	8.62e-46	87.05	3.01e-53
chr1-2140	chr1	23162853	23163001	10.73	5.19e-06	42.36	5.66e-10
chr1-2142	chr1	23538581	23538729	21.47	5.62e-08	29.12	7.23e-09
chr1-2143	chr1	23922360	23922508	10.73	5.19e-06	20.26	8.26e-08
chr1-2145	chr1	23952545	23952693	18.4	1.21e-06	17.37	1.67e-06
chr1-2146	chr1	23979391	23979539	21.47	5.62e-08	31.06	4.67e-09
chr1-2147	chr1	24649164	24649312	21.47	5.62e-08	35.84	1.77e-09
chr1-2148	chr1	25830589	25830737	10.73	5.19e-06	23.3	3.25e-08
chr1-2149	chr1	28316983	28317131	10.73	5.19e-06	33.28	2.93e-09
chr1-215	chr1	39528500	39528648	53.66	1.61e-47	46.6	2.04e-45
chr1-2150	chr1	29902741	29902889	18.4	1.21e-06	36.31	2.4e-08
chr1-2151	chr1	30874036	30874184	10.73	5.19e-06	9.32	1.26e-05
chr1-2152	chr1	31061511	31061659	21.47	5.62e-08	31.06	4.67e-09
chr1-216	chr1	133019393	133019541	17.89	2.31e-31	27.41	1.45e-37
chr1-2162	chr1	34357426	34357574	18.4	1.21e-06	36.31	2.4e-08
chr1-2163	chr1	34433332	34433480	10.73	5.19e-06	9.14	1.43e-05
chr1-2164	chr1	34571900	34572048	21.47	5.62e-08	15.03	5.92e-07
chr1-2168	chr1	35983997	35984145	18.4	1.21e-06	11.41	1.73e-05
chr1-217	chr1	135344169	135344317	107.33	6.48e-58	36.4	9.34e-42
chr1-2171	chr1	36580478	36580626	10.73	5.19e-06	11.95	2.62e-06
chr1-2174	chr1	36833225	36833373	10.73	5.19e-06	7.9	3.51e-05
chr1-2178	chr1	37956683	37956831	9.2	5.57e-05	30.72	6.34e-08
chr1-2179	chr1	38129621	38129769	21.47	5.62e-08	8.63	2.04e-05
chr1-218	chr1	137051679	137051827	107.33	6.48e-58	77.66	4.73e-53
chr1-2182	chr1	39264637	39264785	21.47	5.62e-08	29.12	7.23e-09
chr1-2183	chr1	39367756	39367904	10.73	5.19e-06	9.32	1.26e-05
chr1-2186	chr1	40303256	40303404	10.73	5.19e-06	8.47	2.28e-05
chr1-2187	chr1	40303709	40303857	21.47	5.62e-08	8.47	2.28e-05
chr1-2188	chr1	40790019	40790167	18.4	1.21e-06	14.79	4.12e-06
chr1-2189	chr1	40844747	40844895	10.73	5.19e-06	46.6	2.95e-10
chr1-219	chr1	156668792	156668940	53.66	1.61e-47	21.18	8.38e-34
chr1-2190	chr1	40929612	40929760	18.4	1.21e-06	24.96	2.11e-07
chr1-2191	chr1	41131433	41131581	10.73	5.19e-06	22.19	4.5e-08
chr1-2192	chr1	41783645	41783793	9.2	5.57e-05	23.49	2.98e-07
chr1-2193	chr1	42654795	42654943	10.73	5.19e-06	35.84	1.77e-09
chr1-2194	chr1	42694654	42694802	21.47	5.62e-08	11.37	3.6e-06
chr1-2197	chr1	45795323	45795471	10.73	5.19e-06	27.41	1.09e-08
chr1-2198	chr1	45914327	45914475	21.47	5.62e-08	25.89	1.6e-08
chr1-2199	chr1	47307103	47307251	21.47	5.62e-08	46.6	2.95e-10
chr1-22	chr1	119049106	119049254	41.4	1.02e-98	51.35	3.91e-106
chr1-220	chr1	184034078	184034226	17.38	4.13e-30	58.03	2.4e-47
chr1-2206	chr1	55027441	55027589	9.2	5.57e-05	9.74	4.1e-05
chr1-2207	chr1	55031292	55031440	10.73	5.19e-06	16.64	3.04e-07
chr1-2208	chr1	55856567	55856715	18.4	1.21e-06	17.37	1.67e-06
chr1-221	chr1	11501680	11501828	101.2	7.25e-54	36.61	1.52e-39
chr1-2212	chr1	57527546	57527694	15.33	2.22e-05	13.31	4.28e-05
chr1-2213	chr1	57995692	57995840	9.2	5.57e-05	10.24	3.13e-05
chr1-2214	chr1	58029802	58029950	9.2	5.57e-05	8.68	7.58e-05
chr1-2216	chr1	58632634	58632782	21.47	5.62e-08	38.83	1.02e-09
chr1-2218	chr1	58882499	58882647	21.47	5.62e-08	58.25	6.37e-11
chr1-222	chr1	37049301	37049449	26.07	8.01e-36	62.87	1.65e-48
chr1-2220	chr1	59119999	59120147	18.4	1.21e-06	13.77	6.14e-06
chr1-2223	chr1	59826329	59826477	9.2	5.57e-05	19.97	7.56e-07
chr1-2224	chr1	60541496	60541644	21.47	5.62e-08	17.26	2.39e-07
chr1-2228	chr1	61095524	61095672	9.2	5.57e-05	24.96	2.11e-07
chr1-223	chr1	37085304	37085452	26.83	2.98e-37	45.68	4.02e-45
chr1-2230	chr1	61763308	61763456	21.47	5.62e-08	35.84	1.77e-09
chr1-2234	chr1	62820206	62820354	18.4	1.21e-06	15.98	2.68e-06
chr1-2236	chr1	63164240	63164388	21.47	5.62e-08	24.52	2.3e-08
chr1-2239	chr1	63432012	63432160	9.2	5.57e-05	22.19	4.14e-07
chr1-224	chr1	53210266	53210414	52.13	8.62e-46	94.3	2.04e-54
chr1-2242	chr1	64226026	64226174	21.47	5.62e-08	12.59	1.87e-06
chr1-2246	chr1	64916991	64917139	21.47	5.62e-08	18.64	1.44e-07
chr1-2247	chr1	65012905	65013053	9.2	5.57e-05	14.26	5.05e-06
chr1-2249	chr1	65440240	65440388	21.47	5.62e-08	38.83	1.02e-09
chr1-225	chr1	59487499	59487647	101.2	7.25e-54	21.75	2.5e-32
chr1-2250	chr1	65684499	65684647	10.73	5.19e-06	35.84	1.77e-09
chr1-2251	chr1	66442979	66443127	10.73	5.19e-06	42.36	5.66e-10
chr1-2252	chr1	66700667	66700815	21.47	5.62e-08	8.79	1.82e-05
chr1-2253	chr1	67968365	67968513	21.47	5.62e-08	10.59	5.65e-06
chr1-2254	chr1	70859434	70859582	21.47	5.62e-08	11.65	3.08e-06
chr1-2255	chr1	71103640	71103788	21.47	5.62e-08	16.64	3.04e-07
chr1-2256	chr1	71241515	71241663	21.47	5.62e-08	14.12	8.89e-07
chr1-2257	chr1	71448653	71448801	10.73	5.19e-06	33.28	2.93e-09
chr1-2258	chr1	71472692	71472840	18.4	1.21e-06	30.72	6.34e-08
chr1-226	chr1	62767660	62767808	26.07	8.01e-36	21.35	5.34e-33
chr1-2260	chr1	71692364	71692512	10.73	5.19e-06	23.3	3.25e-08
chr1-2261	chr1	71706318	71706466	18.4	1.21e-06	21.02	5.64e-07
chr1-2262	chr1	72057852	72058000	18.4	1.21e-06	79.88	2.31e-10
chr1-227	chr1	63442276	63442424	101.2	7.25e-54	26.79	3.39e-35
chr1-2270	chr1	72945507	72945655	9.2	5.57e-05	9.29	5.29e-05
chr1-2271	chr1	73206328	73206476	21.47	5.62e-08	58.25	6.37e-11
chr1-2274	chr1	74542553	74542701	9.2	5.57e-05	26.63	1.45e-07
chr1-2277	chr1	74891638	74891786	9.2	5.57e-05	9.29	5.29e-05
chr1-2278	chr1	74900776	74900924	10.73	5.19e-06	11.65	3.08e-06
chr1-2279	chr1	74935545	74935693	10.73	5.19e-06	31.06	4.67e-09
chr1-228	chr1	64885097	64885245	17.89	2.31e-31	51.77	5.5e-47
chr1-2285	chr1	75263823	75263971	18.4	1.21e-06	9.99	3.58e-05
chr1-2289	chr1	75521340	75521488	10.73	5.19e-06	10.35	6.51e-06
chr1-229	chr1	97622914	97623062	53.66	1.61e-47	62.97	6.57e-50
chr1-2292	chr1	78013157	78013305	21.47	5.62e-08	35.84	1.77e-09
chr1-2293	chr1	78110491	78110639	9.2	5.57e-05	33.28	3.98e-08
chr1-2295	chr1	78478881	78479029	21.47	5.62e-08	25.89	1.6e-08
chr1-2298	chr1	80349643	80349791	9.2	5.57e-05	36.31	2.4e-08
chr1-2299	chr1	81545389	81545537	18.4	1.21e-06	17.37	1.67e-06
chr1-23	chr1	7047366	7047514	40.38	1.73e-95	77.34	2.19e-117
chr1-230	chr1	186757329	186757477	107.33	6.48e-58	110.95	2.05e-58
chr1-2300	chr1	81562816	81562964	10.73	5.19e-06	232.99	4.25e-15
chr1-2301	chr1	81609796	81609944	10.73	5.19e-06	35.84	1.77e-09
chr1-2302	chr1	81826445	81826593	21.47	5.62e-08	93.19	2.48e-12
chr1-2303	chr1	82294113	82294261	9.2	5.57e-05	9.29	5.29e-05
chr1-2305	chr1	82803787	82803935	10.73	5.19e-06	33.28	2.93e-09
chr1-2307	chr1	83535519	83535667	10.73	5.19e-06	13.71	1.08e-06
chr1-2309	chr1	84332922	84333070	21.47	5.62e-08	18.64	1.44e-07
chr1-231	chr1	189013493	189013641	25.3	2.09e-34	42.24	1.52e-41
chr1-2310	chr1	84850450	84850598	10.73	5.19e-06	7.17	6.32e-05
chr1-2313	chr1	85853450	85853598	21.47	5.62e-08	25.89	1.6e-08
chr1-2318	chr1	86236679	86236827	9.2	5.57e-05	11.41	1.73e-05
chr1-2319	chr1	86278238	86278386	10.73	5.19e-06	17.92	1.86e-07
chr1-232	chr1	6059209	6059357	52.13	8.62e-46	80.83	3.63e-52
chr1-2321	chr1	86618600	86618748	10.73	5.19e-06	29.12	7.23e-09
chr1-2322	chr1	86647568	86647716	9.2	5.57e-05	11.09	2.02e-05
chr1-2324	chr1	87239178	87239326	18.4	1.21e-06	18.15	1.3e-06
chr1-2325	chr1	87658207	87658355	10.73	5.19e-06	17.26	2.39e-07
chr1-2326	chr1	87687228	87687376	21.47	5.62e-08	16.64	3.04e-07
chr1-233	chr1	12991106	12991254	12.65	5.08e-25	25.25	2.22e-34
chr1-2330	chr1	88575244	88575392	21.47	5.62e-08	14.56	7.28e-07
chr1-2332	chr1	88623640	88623788	10.73	5.19e-06	22.19	4.5e-08
chr1-2335	chr1	88918791	88918939	9.2	5.57e-05	13.77	6.14e-06
chr1-2336	chr1	89034227	89034375	9.2	5.57e-05	13.77	6.14e-06
chr1-2337	chr1	89102262	89102410	10.73	5.19e-06	21.18	6.14e-08
chr1-2338	chr1	89183336	89183484	10.73	5.19e-06	12.26	2.21e-06
chr1-234	chr1	13094683	13094831	17.38	4.13e-30	39.02	1.31e-41
chr1-2340	chr1	89524526	89524674	10.73	5.19e-06	15.03	5.92e-07
chr1-2345	chr1	90221891	90222039	21.47	5.62e-08	17.26	2.39e-07
chr1-2346	chr1	90275993	90276141	18.4	1.21e-06	33.28	3.98e-08
chr1-2347	chr1	90336870	90337018	21.47	5.62e-08	20.26	8.26e-08
chr1-235	chr1	39122773	39122921	50.6	4.49e-44	84.49	2.62e-51
chr1-2350	chr1	90901321	90901469	10.73	5.19e-06	17.26	2.39e-07
chr1-2351	chr1	90973360	90973508	10.73	5.19e-06	18.64	1.44e-07
chr1-2352	chr1	91313466	91313614	10.73	5.19e-06	9.32	1.26e-05
chr1-2353	chr1	91459413	91459561	9.2	5.57e-05	17.37	1.67e-06
chr1-2354	chr1	91494454	91494602	10.73	5.19e-06	25.89	1.6e-08
chr1-2358	chr1	92641968	92642116	21.47	5.62e-08	58.25	6.37e-11
chr1-2359	chr1	92737883	92738031	10.73	5.19e-06	38.83	1.02e-09
chr1-236	chr1	72313180	72313328	49.06	2.27e-42	36.73	1.94e-38
chr1-2364	chr1	93804232	93804380	10.73	5.19e-06	8.47	2.28e-05
chr1-2365	chr1	95033747	95033895	9.2	5.57e-05	9.51	4.66e-05
chr1-2366	chr1	95313570	95313718	18.4	1.21e-06	21.02	5.64e-07
chr1-2367	chr1	95499671	95499819	18.4	1.21e-06	14.79	4.12e-06
chr1-2368	chr1	97760636	97760784	9.2	5.57e-05	30.72	6.34e-08
chr1-2369	chr1	102274314	102274462	21.47	5.62e-08	31.06	4.67e-09
chr1-237	chr1	77496965	77497113	24.53	5.3e-33	25.66	1.32e-33
chr1-2370	chr1	102350671	102350819	21.47	5.62e-08	16.07	3.82e-07
chr1-2371	chr1	105555393	105555541	21.47	5.62e-08	66.57	2.54e-11
chr1-2372	chr1	106072069	106072217	18.4	1.21e-06	14.26	5.05e-06
chr1-2374	chr1	110904274	110904422	18.4	1.21e-06	22.19	4.14e-07
chr1-2375	chr1	110969364	110969512	18.4	1.21e-06	33.28	3.98e-08
chr1-2376	chr1	115773293	115773441	10.73	5.19e-06	58.25	6.37e-11
chr1-2377	chr1	116269657	116269805	21.47	5.62e-08	116.49	5.29e-13
chr1-2378	chr1	117313961	117314109	10.73	5.19e-06	22.19	4.5e-08
chr1-238	chr1	77629970	77630118	24.53	5.3e-33	43.47	1e-40
chr1-2382	chr1	118362598	118362746	21.47	5.62e-08	23.3	3.25e-08
chr1-239	chr1	156565450	156565598	24.53	5.3e-33	38.04	6.49e-39
chr1-2391	chr1	120042535	120042683	10.73	5.19e-06	19.42	1.1e-07
chr1-2393	chr1	120266532	120266680	10.73	5.19e-06	13.31	1.3e-06
chr1-2394	chr1	120374222	120374370	21.47	5.62e-08	25.89	1.6e-08
chr1-2395	chr1	120401225	120401373	10.73	5.19e-06	29.12	7.23e-09
chr1-2397	chr1	122724920	122725068	21.47	5.62e-08	77.66	8.76e-12
chr1-2399	chr1	127204835	127204983	18.4	1.21e-06	12.88	8.89e-06
chr1-24	chr1	133397648	133397796	245.32	1.18e-158	64.94	7.26e-113
chr1-240	chr1	178360750	178360898	104.26	6.95e-56	26.94	2.71e-36
chr1-2402	chr1	128109147	128109295	18.4	1.21e-06	17.37	1.67e-06
chr1-2404	chr1	128437500	128437648	18.4	1.21e-06	12.1	1.26e-05
chr1-241	chr1	4970692	4970840	101.2	7.25e-54	19.44	8.52e-31
chr1-2411	chr1	131719310	131719458	9.2	5.57e-05	12.88	8.89e-06
chr1-2412	chr1	131820479	131820627	10.73	5.19e-06	12.26	2.21e-06
chr1-2413	chr1	132190157	132190305	21.47	5.62e-08	9.32	1.26e-05
chr1-2419	chr1	132968733	132968881	21.47	5.62e-08	19.42	1.1e-07
chr1-242	chr1	14292365	14292513	16.87	7.19e-29	39.94	9.26e-41
chr1-2420	chr1	133068437	133068585	21.47	5.62e-08	33.28	2.93e-09
chr1-2421	chr1	133080085	133080233	21.47	5.62e-08	9.14	1.43e-05
chr1-2423	chr1	133434329	133434477	10.73	5.19e-06	8.47	2.28e-05
chr1-2427	chr1	133710760	133710908	10.73	5.19e-06	8.03	3.16e-05
chr1-2428	chr1	133732859	133733007	10.73	5.19e-06	17.92	1.86e-07
chr1-243	chr1	20761540	20761688	49.06	2.27e-42	50.72	8.04e-43
chr1-2431	chr1	133896417	133896565	10.73	5.19e-06	15.53	4.77e-07
chr1-2434	chr1	134435531	134435679	18.4	1.21e-06	10.79	2.35e-05
chr1-2437	chr1	135313642	135313790	10.73	5.19e-06	21.18	6.14e-08
chr1-2439	chr1	135472671	135472819	10.73	5.19e-06	10.84	4.88e-06
chr1-244	chr1	39700696	39700844	98.13	7.34e-52	78.89	7.29e-49
chr1-2441	chr1	135687294	135687442	21.47	5.62e-08	8.63	2.04e-05
chr1-2443	chr1	135792380	135792528	21.47	5.62e-08	10.13	7.48e-06
chr1-2446	chr1	136394660	136394808	9.2	5.57e-05	24.96	2.11e-07
chr1-245	chr1	56697624	56697772	98.13	7.34e-52	112.11	1.08e-53
chr1-2450	chr1	136584052	136584200	10.73	5.19e-06	12.94	1.56e-06
chr1-2454	chr1	138180097	138180245	21.47	5.62e-08	35.84	1.77e-09
chr1-2455	chr1	138620158	138620306	10.73	5.19e-06	9.51	1.11e-05
chr1-2456	chr1	139412532	139412680	21.47	5.62e-08	13.71	1.08e-06
chr1-2457	chr1	140183580	140183728	9.2	5.57e-05	9.29	5.29e-05
chr1-246	chr1	58188673	58188821	101.2	7.25e-54	36.61	1.52e-39
chr1-2460	chr1	142742423	142742571	10.73	5.19e-06	58.25	6.37e-11
chr1-2461	chr1	146322949	146323097	21.47	5.62e-08	22.19	4.5e-08
chr1-2462	chr1	150393154	150393302	9.2	5.57e-05	9.08	5.98e-05
chr1-2463	chr1	151259209	151259357	21.47	5.62e-08	18.64	1.44e-07
chr1-2467	chr1	152565887	152566035	9.2	5.57e-05	36.31	2.4e-08
chr1-247	chr1	58689517	58689665	25.3	2.09e-34	122.04	1.59e-56
chr1-2475	chr1	153180275	153180423	21.47	5.62e-08	15.53	4.77e-07
chr1-2476	chr1	153332723	153332871	10.73	5.19e-06	11.65	3.08e-06
chr1-248	chr1	63138183	63138331	49.06	2.27e-42	21.09	5.43e-31
chr1-2480	chr1	153500094	153500242	21.47	5.62e-08	17.92	1.86e-07
chr1-2482	chr1	153932791	153932939	10.73	5.19e-06	22.19	4.5e-08
chr1-2483	chr1	154383307	154383455	9.2	5.57e-05	44.38	7.41e-09
chr1-2484	chr1	154559579	154559727	18.4	1.21e-06	33.28	3.98e-08
chr1-2485	chr1	154745411	154745559	10.73	5.19e-06	24.52	2.3e-08
chr1-2486	chr1	154786333	154786481	21.47	5.62e-08	38.83	1.02e-09
chr1-2487	chr1	154842282	154842430	21.47	5.62e-08	29.12	7.23e-09
chr1-2488	chr1	154994897	154995045	18.4	1.21e-06	13.31	7.41e-06
chr1-249	chr1	72577455	72577603	15.84	1.99e-26	33.83	3.24e-36
chr1-2491	chr1	155594226	155594374	10.73	5.19e-06	46.6	2.95e-10
chr1-2492	chr1	155735746	155735894	18.4	1.21e-06	9.08	5.98e-05
chr1-2494	chr1	155812838	155812986	9.2	5.57e-05	19.97	7.56e-07
chr1-2498	chr1	157077188	157077336	10.73	5.19e-06	8.63	2.04e-05
chr1-25	chr1	135632336	135632484	119.6	1.53e-130	94.4	1.32e-122
chr1-250	chr1	78657757	78657905	49.06	2.27e-42	43.47	1e-40
chr1-2500	chr1	159409589	159409737	21.47	5.62e-08	21.18	6.14e-08
chr1-2503	chr1	161158779	161158927	18.4	1.21e-06	8.68	7.58e-05
chr1-2504	chr1	161463757	161463905	10.73	5.19e-06	23.3	3.25e-08
chr1-2507	chr1	162933799	162933947	10.73	5.19e-06	58.25	6.37e-11
chr1-2508	chr1	163308775	163308923	21.47	5.62e-08	15.03	5.92e-07
chr1-2509	chr1	163530750	163530898	18.4	1.21e-06	33.28	3.98e-08
chr1-251	chr1	83038443	83038591	9.2	4.06e-19	31.2	4.43e-34
chr1-2510	chr1	164138774	164138922	9.2	5.57e-05	22.19	4.14e-07
chr1-2513	chr1	164641836	164641984	9.2	5.57e-05	19.02	9.99e-07
chr1-2515	chr1	164905143	164905291	10.73	5.19e-06	51.77	1.43e-10
chr1-2517	chr1	165629362	165629510	21.47	5.62e-08	12.26	2.21e-06
chr1-2518	chr1	165655174	165655322	21.47	5.62e-08	12.26	2.21e-06
chr1-252	chr1	87230684	87230832	23.77	1.3e-31	10.48	2.81e-21
chr1-2520	chr1	165789091	165789239	10.73	5.19e-06	19.42	1.1e-07
chr1-2522	chr1	166319246	166319394	10.73	5.19e-06	33.28	2.93e-09
chr1-2523	chr1	166843462	166843610	21.47	5.62e-08	20.26	8.26e-08
chr1-2524	chr1	166902514	166902662	9.2	5.57e-05	13.31	7.41e-06
chr1-2525	chr1	167002584	167002732	10.73	5.19e-06	18.64	1.44e-07
chr1-2527	chr1	167297858	167298006	9.2	5.57e-05	12.88	8.89e-06
chr1-2528	chr1	167322458	167322606	21.47	5.62e-08	77.66	8.76e-12
chr1-2529	chr1	167374563	167374711	10.73	5.19e-06	16.07	3.82e-07
chr1-253	chr1	87313895	87314043	23.77	1.3e-31	19.84	2.72e-29
chr1-2532	chr1	170101719	170101867	9.2	5.57e-05	23.49	2.98e-07
chr1-2533	chr1	170963031	170963179	18.4	1.21e-06	18.15	1.3e-06
chr1-254	chr1	131891583	131891731	50.6	4.49e-44	13.15	1.54e-25
chr1-2541	chr1	171567067	171567215	21.47	5.62e-08	11.37	3.6e-06
chr1-2546	chr1	173868650	173868798	10.73	5.19e-06	42.36	5.66e-10
chr1-2549	chr1	176012017	176012165	10.73	5.19e-06	22.19	4.5e-08
chr1-255	chr1	143555650	143555798	24.53	5.3e-33	60.86	2.61e-45
chr1-2550	chr1	176029246	176029394	18.4	1.21e-06	9.51	4.66e-05
chr1-2551	chr1	176612999	176613147	18.4	1.21e-06	21.02	5.64e-07
chr1-2558	chr1	179487347	179487495	10.73	5.19e-06	12.59	1.87e-06
chr1-2559	chr1	179529870	179530018	21.47	5.62e-08	42.36	5.66e-10
chr1-256	chr1	152915816	152915964	49.06	2.27e-42	18.21	4.76e-29
chr1-2560	chr1	179645793	179645941	9.2	5.57e-05	36.31	2.4e-08
chr1-2567	chr1	180958670	180958818	21.47	5.62e-08	15.53	4.77e-07
chr1-257	chr1	152943106	152943254	24.53	5.3e-33	101.44	2.57e-52
chr1-2571	chr1	181902124	181902272	10.73	5.19e-06	13.71	1.08e-06
chr1-2574	chr1	182271810	182271958	18.4	1.21e-06	10.51	2.72e-05
chr1-2575	chr1	182282777	182282925	21.47	5.62e-08	11.09	4.2e-06
chr1-2577	chr1	182763922	182764070	10.73	5.19e-06	13.71	1.08e-06
chr1-258	chr1	186929318	186929466	50.6	4.49e-44	43.93	4.3e-42
chr1-2580	chr1	183359031	183359179	21.47	5.62e-08	58.25	6.37e-11
chr1-2581	chr1	183985137	183985285	18.4	1.21e-06	66.57	6.81e-10
chr1-2582	chr1	184994227	184994375	21.47	5.62e-08	20.26	8.26e-08
chr1-2588	chr1	187007753	187007901	15.33	2.22e-05	15.85	1.9e-05
chr1-259	chr1	12025935	12026083	47.53	1.12e-40	103.18	5.82e-51
chr1-2590	chr1	187603105	187603253	21.47	5.62e-08	11.65	3.08e-06
chr1-2591	chr1	187749196	187749344	21.47	5.62e-08	46.6	2.95e-10
chr1-2592	chr1	187779745	187779893	9.2	5.57e-05	19.02	9.99e-07
chr1-2593	chr1	187997623	187997771	15.33	2.22e-05	20.8	5.26e-06
chr1-2594	chr1	188795895	188796043	10.73	5.19e-06	25.89	1.6e-08
chr1-2596	chr1	189235298	189235446	21.47	5.62e-08	35.84	1.77e-09
chr1-2599	chr1	189755156	189755304	18.4	1.21e-06	12.88	8.89e-06
chr1-26	chr1	182163117	182163265	119.6	1.53e-130	74.18	1.58e-114
chr1-260	chr1	24043122	24043270	23.77	1.3e-31	98.27	2.6e-50
chr1-2600	chr1	189812229	189812377	21.47	5.62e-08	25.89	1.6e-08
chr1-2602	chr1	191070265	191070413	10.73	5.19e-06	11.95	2.62e-06
chr1-2608	chr1	192472493	192472641	9.2	5.57e-05	44.38	7.41e-09
chr1-2609	chr1	193588818	193588966	9.2	5.57e-05	11.09	2.02e-05
chr1-261	chr1	38869468	38869616	23	3.1e-30	62.41	6.67e-43
chr1-2610	chr1	195010877	195011025	21.47	5.62e-08	33.28	2.93e-09
chr1-262	chr1	41390383	41390531	49.06	2.27e-42	92.62	4.58e-51
chr1-263	chr1	53581416	53581564	95.06	7.2e-50	51.59	9.26e-42
chr1-264	chr1	141853945	141854093	95.06	7.2e-50	128.97	6.13e-54
chr1-265	chr1	153216555	153216703	24.53	5.3e-33	60.86	2.61e-45
chr1-266	chr1	164503566	164503714	47.53	1.12e-40	47.99	8.33e-41
chr1-267	chr1	193732305	193732453	47.53	1.12e-40	49.13	4.08e-41
chr1-268	chr1	33106428	33106576	22.23	7.13e-29	77.22	3.6e-44
chr1-269	chr1	33494908	33495056	95.06	7.2e-50	73.7	1.75e-46
chr1-27	chr1	53750010	53750158	116.53	2.16e-126	53.82	3.23e-101
chr1-270	chr1	38621962	38622110	46	5.3e-39	35.04	1.52e-35
chr1-271	chr1	65040962	65041110	44.46	2.44e-37	58.5	1e-40
chr1-272	chr1	75027080	75027228	44.46	2.44e-37	77.22	3.6e-44
chr1-273	chr1	96874764	96874912	46	5.3e-39	28.94	4.06e-33
chr1-274	chr1	154080753	154080901	47.53	1.12e-40	30.35	8.75e-35
chr1-275	chr1	163163743	163163891	44.46	2.44e-37	55.16	5.35e-40
chr1-276	chr1	36013838	36013986	22.23	7.13e-29	12.87	2.19e-22
chr1-277	chr1	65370969	65371117	85.86	5.6e-44	69.03	2.33e-41
chr1-278	chr1	72205270	72205418	22.23	7.13e-29	28.39	7.82e-32
chr1-279	chr1	74582712	74582860	44.46	2.44e-37	83.93	3.3e-45
chr1-28	chr1	164377194	164377342	113.46	2.89e-122	43.98	3.02e-92
chr1-280	chr1	86032452	86032600	15.33	3.16e-25	60.52	1.65e-42
chr1-281	chr1	128400380	128400528	22.23	7.13e-29	32.17	2.26e-33
chr1-282	chr1	131867136	131867284	14.82	4.86e-24	58.5	1e-40
chr1-283	chr1	132222311	132222459	92	6.84e-48	110.95	2.63e-50
chr1-284	chr1	136781809	136781957	23	3.1e-30	79.88	4.5e-46
chr1-285	chr1	171090104	171090252	46	5.3e-39	30.72	6.95e-34
chr1-286	chr1	172426523	172426671	14.31	7.22e-23	74.56	2.78e-42
chr1-287	chr1	179087682	179087830	82.8	4.81e-42	34.56	5.34e-32
chr1-288	chr1	187724731	187724879	92	6.84e-48	51.21	2.27e-40
chr1-289	chr1	7207210	7207358	41.4	4.66e-34	36.68	1.12e-32
chr1-29	chr1	92432275	92432423	57.5	5.04e-102	48.95	7.06e-97
chr1-290	chr1	9702011	9702159	82.8	4.81e-42	25.68	1.3e-28
chr1-291	chr1	43094310	43094458	42.93	1.08e-35	42.36	1.56e-35
chr1-292	chr1	51573071	51573219	44.46	2.44e-37	47.08	4.81e-38
chr1-293	chr1	60839255	60839403	20.7	3.41e-26	52.86	7.3e-37
chr1-294	chr1	88613009	88613157	21.47	1.59e-27	13.03	8.21e-22
chr1-295	chr1	88809993	88810141	42.93	1.08e-35	15.15	1.61e-23
chr1-296	chr1	94993528	94993676	88.93	6.3e-46	120.65	9.86e-50
chr1-297	chr1	106722145	106722293	42.93	1.08e-35	77.66	8.99e-43
chr1-298	chr1	119453786	119453934	44.46	2.44e-37	48.26	2.39e-38
chr1-299	chr1	180480454	180480602	42.93	1.08e-35	41.42	2.89e-35
chr1-3	chr1	35944413	35944561	210.06	3.86e-261	102.47	1.01e-218
chr1-30	chr1	139494738	139494886	57.5	5.04e-102	47.55	5.94e-96
chr1-300	chr1	184497156	184497304	85.86	5.6e-44	53.25	2.95e-38
chr1-301	chr1	185488350	185488498	21.47	1.59e-27	35.84	1.49e-33
chr1-302	chr1	7020687	7020835	76.66	3.17e-38	61.64	6.85e-36
chr1-303	chr1	17687127	17687275	38.33	7.68e-31	79.25	1.4e-38
chr1-304	chr1	39923836	39923984	21.47	1.59e-27	46.6	1.15e-36
chr1-305	chr1	52527803	52527951	82.8	4.81e-42	49.93	3.31e-36
chr1-306	chr1	75512030	75512178	19.93	7.08e-25	20.13	5.58e-25
chr1-307	chr1	89878541	89878689	82.8	4.81e-42	13.02	4.41e-21
chr1-308	chr1	103094005	103094153	41.4	4.66e-34	71.89	2.07e-40
chr1-309	chr1	119157380	119157528	82.8	4.81e-42	74.89	6.98e-41
chr1-31	chr1	35232786	35232934	223.86	4.82e-142	63.94	1.15e-102
chr1-310	chr1	136953728	136953876	13.8	1.04e-21	12.23	2.13e-20
chr1-311	chr1	140513574	140513722	82.8	4.81e-42	61.98	1.07e-38
chr1-312	chr1	161274244	161274392	82.8	4.81e-42	37.44	6.54e-33
chr1-313	chr1	165678906	165679054	82.8	4.81e-42	59.91	2.64e-38
chr1-314	chr1	167282249	167282397	20.7	3.41e-26	20.42	4.82e-26
chr1-315	chr1	178406953	178407101	42.93	1.08e-35	64.27	1.67e-40
chr1-316	chr1	178734736	178734884	42.93	1.08e-35	53.25	2.95e-38
chr1-317	chr1	183184816	183184964	42.93	1.08e-35	62.13	4.25e-40
chr1-318	chr1	19244717	19244865	19.17	1.41e-23	52.01	4.44e-34
chr1-319	chr1	59448571	59448719	13.29	1.43e-20	21.11	1.71e-25
chr1-32	chr1	88668948	88669096	105.8	4.74e-112	40.65	7.9e-84
chr1-320	chr1	64576770	64576918	39.87	1.93e-32	33.94	1.13e-30
chr1-321	chr1	75601825	75601973	79.73	3.98e-40	36.06	2.45e-31
chr1-322	chr1	78168070	78168218	39.87	1.93e-32	64.1	1.07e-37
chr1-323	chr1	80315907	80316055	76.66	3.17e-38	41.6	1.04e-31
chr1-324	chr1	80403634	80403782	73.6	2.43e-36	51.54	1.1e-32
chr1-325	chr1	103472644	103472792	82.8	4.81e-42	42.79	1.94e-34
chr1-326	chr1	117459228	117459376	19.17	1.41e-23	42.67	5.62e-32
chr1-327	chr1	118776600	118776748	79.73	3.98e-40	64.1	1.07e-37
chr1-328	chr1	123065319	123065467	82.8	4.81e-42	66.57	1.61e-39
chr1-329	chr1	132281961	132282109	19.17	1.41e-23	22.19	4.31e-25
chr1-33	chr1	131890399	131890547	226.92	2.12e-144	34.69	8.21e-85
chr1-330	chr1	133856154	133856302	41.4	4.66e-34	24.29	5.48e-28
chr1-331	chr1	166300659	166300807	39.87	1.93e-32	64.1	1.07e-37
chr1-332	chr1	190131484	190131632	82.8	4.81e-42	52.86	7.3e-37
chr1-333	chr1	191930616	191930764	39.87	1.93e-32	35.32	4.12e-31
chr1-334	chr1	25012889	25013037	39.87	1.93e-32	108.17	1.56e-43
chr1-335	chr1	38058471	38058619	79.73	3.98e-40	57.69	1.58e-36
chr1-336	chr1	68780210	68780358	19.93	7.08e-25	108.17	1.56e-43
chr1-337	chr1	71650845	71650993	9.58	1.36e-16	9.35	2.37e-16
chr1-338	chr1	72672397	72672545	79.73	3.98e-40	40.25	1.51e-32
chr1-339	chr1	75616893	75617041	39.87	1.93e-32	69.23	1.49e-38
chr1-34	chr1	64733606	64733754	110.4	3.67e-118	21.3	7.04e-68
chr1-340	chr1	77456812	77456960	6.64	1.47e-13	12.02	1.6e-19
chr1-341	chr1	105522450	105522598	12.78	1.91e-19	52.01	4.44e-34
chr1-342	chr1	117054931	117055079	38.33	7.68e-31	66.57	1.03e-36
chr1-343	chr1	151220215	151220363	76.66	3.17e-38	87.59	1.18e-39
chr1-344	chr1	153766555	153766703	12.27	2.45e-18	45.65	1.9e-31
chr1-345	chr1	155035321	155035469	39.87	1.93e-32	64.1	1.07e-37
chr1-346	chr1	166135170	166135318	9.2	1.31e-15	20.75	1.75e-23
chr1-347	chr1	167448641	167448789	9.97	1.36e-17	40.25	1.51e-32
chr1-348	chr1	172107818	172107966	38.33	7.68e-31	138.68	1.35e-44
chr1-349	chr1	173418894	173419042	19.93	7.08e-25	40.25	1.51e-32
chr1-35	chr1	192515539	192515687	220.79	1.08e-139	106.51	4.74e-117
chr1-350	chr1	7671765	7671913	76.66	3.17e-38	48.95	1.96e-33
chr1-351	chr1	7732807	7732955	36.8	2.95e-29	106.51	3.78e-40
chr1-352	chr1	8581919	8582067	36.8	2.95e-29	31.33	1.25e-27
chr1-353	chr1	20908691	20908839	73.6	2.43e-36	31.95	7.91e-28
chr1-354	chr1	34103754	34103902	12.27	2.45e-18	8.32	1.12e-14
chr1-355	chr1	36054714	36054862	36.8	2.95e-29	31.33	1.25e-27
chr1-356	chr1	36804157	36804305	67.46	1.26e-32	35.72	1.13e-26
chr1-357	chr1	39534058	39534206	73.6	2.43e-36	35.5	6.8e-29
chr1-358	chr1	57970227	57970375	38.33	7.68e-31	44.98	1.55e-32
chr1-359	chr1	67307778	67307926	73.6	2.43e-36	133.14	1.87e-42
chr1-36	chr1	16130080	16130228	54.43	5.08e-95	70.54	6.9e-103
chr1-360	chr1	73500772	73500920	76.66	3.17e-38	59.44	1.68e-35
chr1-361	chr1	75888941	75889089	19.17	1.41e-23	43.79	2.98e-32
chr1-362	chr1	92520176	92520324	76.66	3.17e-38	97.89	7.55e-41
chr1-363	chr1	113964576	113964724	19.17	1.41e-23	41.6	1.04e-31
chr1-364	chr1	134188980	134189128	35.27	1.08e-27	27.84	2.1e-25
chr1-365	chr1	135655441	135655589	38.33	7.68e-31	46.23	7.95e-33
chr1-366	chr1	136233304	136233452	7.36	1.49e-13	21.3	9.58e-24
chr1-367	chr1	151293754	151293902	33.73	3.82e-26	40.68	6.94e-28
chr1-368	chr1	153493510	153493658	6.39	9.85e-13	29.72	3.69e-28
chr1-369	chr1	156983688	156983836	11.76	3.01e-17	23.2	1.18e-23
chr1-37	chr1	51536109	51536257	208.52	2.35e-130	45.72	4.9e-86
chr1-370	chr1	171221599	171221747	8.82	1.21e-14	23.92	5.98e-24
chr1-371	chr1	178284079	178284227	76.66	3.17e-38	25.6	1.34e-26
chr1-372	chr1	189006482	189006630	38.33	7.68e-31	34.67	8.82e-30
chr1-373	chr1	189608774	189608922	12.27	2.45e-18	32.6	4.94e-28
chr1-374	chr1	191524866	191525014	76.66	3.17e-38	75.64	4.41e-38
chr1-375	chr1	6142891	6143039	36.8	2.95e-29	69.46	9.56e-36
chr1-376	chr1	10854643	10854791	67.46	1.26e-32	19.27	5.52e-21
chr1-377	chr1	11748578	11748726	17.63	5.01e-21	30.02	3.93e-26
chr1-378	chr1	13938455	13938603	36.8	2.95e-29	99.85	1.75e-39
chr1-379	chr1	20974969	20975117	67.46	1.26e-32	34.87	1.88e-26
chr1-38	chr1	118648128	118648276	35.78	3.08e-81	41.24	1.91e-85
chr1-380	chr1	25310161	25310309	73.6	2.43e-36	114.12	7.32e-41
chr1-381	chr1	30805058	30805206	70.53	1.79e-34	47.85	1.15e-30
chr1-382	chr1	36014525	36014673	16.87	8.85e-20	9.39	1.3e-14
chr1-383	chr1	38824016	38824164	16.87	8.85e-20	36.61	6.63e-27
chr1-384	chr1	52008389	52008537	33.73	3.82e-26	23.25	1.03e-22
chr1-385	chr1	55205904	55206052	18.4	2.72e-22	49.93	2.31e-32
chr1-386	chr1	64732210	64732358	36.8	2.95e-29	6.31	3.5e-12
chr1-388	chr1	86498151	86498299	7.05	1.1e-12	17.01	1.09e-20
chr1-389	chr1	88432694	88432842	11.24	3.56e-16	37.55	3.86e-27
chr1-39	chr1	67935864	67936012	104.26	5.01e-110	65.6	1.67e-96
chr1-390	chr1	88924363	88924511	11.24	3.56e-16	38.54	2.21e-27
chr1-391	chr1	90060263	90060411	16.87	8.85e-20	52.3	3.11e-30
chr1-392	chr1	126675174	126675322	73.6	2.43e-36	93.98	7.39e-39
chr1-393	chr1	136696044	136696192	33.73	3.82e-26	12.41	4.83e-17
chr1-394	chr1	138267109	138267257	36.8	2.95e-29	84.09	1.04e-37
chr1-395	chr1	158356262	158356410	18.4	2.72e-22	66.57	2.62e-35
chr1-396	chr1	160311979	160312127	70.53	1.79e-34	12.87	4.44e-18
chr1-397	chr1	161379772	161379920	70.53	1.79e-34	69.59	2.42e-34
chr1-398	chr1	161920828	161920976	18.4	2.72e-22	30.14	3.06e-27
chr1-399	chr1	164522389	164522537	33.73	3.82e-26	31.16	2.07e-25
chr1-4	chr1	180933801	180933949	202.39	1.47e-249	65.09	4.08e-185
chr1-40	chr1	121087261	121087409	52.13	7.86e-90	60.35	4.42e-94
chr1-400	chr1	170696607	170696755	17.63	5.01e-21	46.4	2.31e-30
chr1-401	chr1	172701445	172701593	36.8	2.95e-29	79.88	3.49e-37
chr1-402	chr1	182094578	182094726	12.27	2.45e-18	24.58	3.43e-25
chr1-403	chr1	191661915	191662063	73.6	2.43e-36	19.48	7.37e-23
chr1-404	chr1	8940863	8941011	16.1	1.5e-18	27.41	3.38e-23
chr1-405	chr1	12691986	12692134	64.4	8.52e-31	13.98	2.41e-17
chr1-406	chr1	13059774	13059922	16.87	8.85e-20	37.55	3.86e-27
chr1-407	chr1	13660687	13660835	11.24	3.56e-16	25.69	1.24e-23
chr1-408	chr1	33830707	33830855	67.46	1.26e-32	104.61	9.14e-37
chr1-409	chr1	37001762	37001910	17.63	5.01e-21	32.58	6.37e-27
chr1-41	chr1	136570391	136570539	105.8	4.74e-112	29.83	8.14e-75
chr1-410	chr1	37212534	37212682	33.73	3.82e-26	37.55	3.86e-27
chr1-411	chr1	43139647	43139795	11.76	3.01e-17	51.04	2.69e-31
chr1-412	chr1	43188544	43188692	16.87	8.85e-20	45.77	5.52e-29
chr1-413	chr1	55575965	55576113	16.87	8.85e-20	63.67	4.42e-32
chr1-414	chr1	65800395	65800543	35.27	1.08e-27	72.91	8.44e-35
chr1-415	chr1	80150829	80150977	8.82	1.21e-14	58.89	1.06e-32
chr1-416	chr1	84872089	84872237	67.46	1.26e-32	12.85	2.39e-17
chr1-417	chr1	86719389	86719537	16.1	1.5e-18	63.54	1.12e-30
chr1-418	chr1	88813364	88813512	67.46	1.26e-32	19.27	5.52e-21
chr1-419	chr1	89936010	89936158	58.26	3.36e-27	9.44	7.24e-13
chr1-42	chr1	136674850	136674998	14.89	3.14e-54	24.08	1.14e-67
chr1-420	chr1	90528093	90528241	35.27	1.08e-27	38.28	1.73e-28
chr1-421	chr1	131909796	131909944	33.73	3.82e-26	24.82	2.58e-23
chr1-422	chr1	134501025	134501173	33.73	3.82e-26	35.72	1.13e-26
chr1-423	chr1	136139121	136139269	35.27	1.08e-27	26.4	6.81e-25
chr1-424	chr1	138604060	138604208	35.27	1.08e-27	46.4	2.31e-30
chr1-425	chr1	170871556	170871704	11.24	3.56e-16	20.92	9.84e-22
chr1-426	chr1	172323400	172323548	67.46	1.26e-32	22.88	1.43e-22
chr1-427	chr1	178291688	178291836	16.87	8.85e-20	32.54	8.21e-26
chr1-428	chr1	195001172	195001320	16.1	1.5e-18	49.93	1.62e-28
chr1-429	chr1	6117635	6117783	32.2	1.29e-24	116.49	3.87e-36
chr1-43	chr1	44613435	44613583	208.52	2.35e-130	98.4	2.46e-108
chr1-430	chr1	10853061	10853209	64.4	8.52e-31	18.89	6.26e-20
chr1-431	chr1	16130522	16130670	16.87	8.85e-20	12.62	3.41e-17
chr1-432	chr1	34468614	34468762	67.46	1.26e-32	50.5	6.62e-30
chr1-433	chr1	36251607	36251755	32.2	1.29e-24	27.96	2.27e-23
chr1-434	chr1	36834170	36834318	33.73	3.82e-26	34.06	3.11e-26
chr1-435	chr1	52656758	52656906	32.2	1.29e-24	107.53	2.05e-35
chr1-436	chr1	53750874	53751022	64.4	8.52e-31	9.57	3.53e-14
chr1-437	chr1	55966326	55966474	61.33	5.49e-29	47.55	8.11e-27
chr1-438	chr1	56938579	56938727	67.46	1.26e-32	77.08	7.02e-34
chr1-439	chr1	58369843	58369991	32.2	1.29e-24	29.12	9.91e-24
chr1-44	chr1	80237552	80237700	102.73	5.23e-108	51.26	4.66e-88
chr1-440	chr1	58762703	58762851	16.1	1.5e-18	34.95	2.43e-25
chr1-441	chr1	63243998	63244146	30.67	4.15e-23	9.72	1.08e-13
chr1-442	chr1	66960912	66961060	64.4	8.52e-31	42.36	4.75e-27
chr1-443	chr1	72805553	72805701	32.2	1.29e-24	15.71	2.44e-18
chr1-444	chr1	72813148	72813296	33.73	3.82e-26	26.15	8.56e-24
chr1-445	chr1	88608330	88608478	32.2	1.29e-24	8.22	6.12e-13
chr1-446	chr1	88806969	88807117	32.2	1.29e-24	14.56	1.08e-17
chr1-447	chr1	91413193	91413341	8.43	1.07e-13	21.86	3.92e-22
chr1-448	chr1	118642689	118642837	67.46	1.26e-32	17.23	5.69e-20
chr1-449	chr1	119003912	119004060	16.87	8.85e-20	31.16	2.07e-25
chr1-45	chr1	119634867	119635015	102.73	5.23e-108	139.38	8.24e-117
chr1-450	chr1	119305298	119305446	67.46	1.26e-32	16.27	1.86e-19
chr1-451	chr1	127904859	127905007	61.33	5.49e-29	49.31	3.98e-27
chr1-452	chr1	140188606	140188754	67.46	1.26e-32	37.55	3.86e-27
chr1-453	chr1	161180794	161180942	9.71	4.45e-13	38.33	8.12e-24
chr1-454	chr1	166142419	166142567	67.46	1.26e-32	21.22	7.28e-22
chr1-455	chr1	167915930	167916078	64.4	8.52e-31	31.77	1.69e-24
chr1-456	chr1	179462554	179462702	16.1	1.5e-18	26.38	7.36e-23
chr1-457	chr1	185149400	185149548	67.46	1.26e-32	77.08	7.02e-34
chr1-458	chr1	189740130	189740278	64.4	8.52e-31	45.09	1.32e-27
chr1-459	chr1	190448116	190448264	16.87	8.85e-20	32.54	8.21e-26
chr1-46	chr1	140434980	140435128	52.13	7.86e-90	74.21	4.25e-100
chr1-460	chr1	194506023	194506171	64.4	8.52e-31	69.9	1.56e-31
chr1-461	chr1	11395514	11395662	10.22	4.33e-14	11.09	9.73e-15
chr1-462	chr1	12693438	12693586	7.67	7.36e-12	12.93	5.84e-16
chr1-463	chr1	14312618	14312766	10.73	4.02e-15	30.39	4.18e-24
chr1-464	chr1	14421125	14421273	30.67	4.15e-23	45.91	1.61e-26
chr1-465	chr1	15131535	15131683	14.57	3.72e-16	48.65	9.72e-26
chr1-466	chr1	34547180	34547328	64.4	8.52e-31	82.23	5.39e-33
chr1-467	chr1	42725046	42725194	15.33	2.42e-17	39.16	3.6e-25
chr1-468	chr1	45407745	45407893	61.33	5.49e-29	95.1	9.55e-33
chr1-469	chr1	46894395	46894543	32.2	1.29e-24	49.93	1.62e-28
chr1-47	chr1	153095490	153095638	49.83	1.07e-84	15.85	1.48e-53
chr1-470	chr1	48652701	48652849	61.33	5.49e-29	22.57	1.52e-20
chr1-471	chr1	55198747	55198895	30.67	4.15e-23	24.65	2.78e-21
chr1-472	chr1	59315095	59315243	30.67	4.15e-23	41.6	1.1e-25
chr1-473	chr1	72207399	72207547	61.33	5.49e-29	14.47	7.14e-17
chr1-474	chr1	72806377	72806525	64.4	8.52e-31	12.82	1.29e-16
chr1-475	chr1	77447254	77447402	8.05	9.09e-13	21.51	4.47e-21
chr1-476	chr1	77452795	77452943	61.33	5.49e-29	9.44	1.82e-13
chr1-477	chr1	84217805	84217953	16.1	1.5e-18	37.78	4.94e-26
chr1-479	chr1	101919092	101919240	64.4	8.52e-31	34.95	2.43e-25
chr1-48	chr1	186510640	186510788	50.6	2.11e-86	26	7.65e-68
chr1-480	chr1	105815576	105815724	29.13	1.27e-21	40.8	2.55e-24
chr1-481	chr1	119147745	119147893	30.67	4.15e-23	35.04	3.14e-24
chr1-482	chr1	119299981	119300129	10.73	4.02e-15	26.88	5.01e-23
chr1-483	chr1	134270111	134270259	16.1	1.5e-18	46.6	6.71e-28
chr1-484	chr1	134560059	134560207	30.67	4.15e-23	15.66	1.62e-17
chr1-485	chr1	135186015	135186163	61.33	5.49e-29	17.52	1.96e-18
chr1-486	chr1	135258522	135258670	32.2	1.29e-24	22.92	1.25e-21
chr1-487	chr1	146929630	146929778	64.4	8.52e-31	232.99	2.02e-42
chr1-488	chr1	153740907	153741055	16.1	1.5e-18	58.25	6.78e-30
chr1-489	chr1	160889940	160890088	10.73	4.02e-15	66.57	4.29e-31
chr1-49	chr1	143731821	143731969	24.53	2.71e-64	32.28	1.19e-71
chr1-490	chr1	161452773	161452921	30.67	4.15e-23	35.98	1.87e-24
chr1-491	chr1	164002007	164002155	15.33	2.42e-17	26.1	9.27e-22
chr1-492	chr1	171419747	171419895	8.05	9.09e-13	29.74	6.46e-24
chr1-493	chr1	175024268	175024416	64.4	8.52e-31	51.77	7.68e-29
chr1-494	chr1	176644420	176644568	58.26	3.36e-27	31.62	2.83e-22
chr1-495	chr1	176994327	176994475	15.33	2.42e-17	21.83	2.87e-20
chr1-496	chr1	177987586	177987734	30.67	4.15e-23	49.31	3.98e-27
chr1-498	chr1	185080088	185080236	10.22	4.33e-14	78.31	4.43e-31
chr1-499	chr1	192870428	192870576	30.67	4.15e-23	38.04	6.33e-25
chr1-5	chr1	180888750	180888898	92.76	3.12e-188	41.73	6.04e-147
chr1-50	chr1	182030254	182030402	101.2	5.37e-106	30.51	2.85e-72
chr1-500	chr1	193542461	193542609	30.67	4.15e-23	16.24	8.24e-18
chr1-501	chr1	5261381	5261529	29.13	1.27e-21	26.91	5.45e-21
chr1-502	chr1	6282392	6282540	13.8	5.44e-15	39.94	5.85e-23
chr1-503	chr1	11096768	11096916	61.33	5.49e-29	35.98	1.87e-24
chr1-504	chr1	36017273	36017421	15.33	2.42e-17	8.65	8.8e-13
chr1-505	chr1	39430374	39430522	29.13	1.27e-21	21.81	2.51e-19
chr1-506	chr1	40306226	40306374	29.13	1.27e-21	31.62	2.83e-22
chr1-507	chr1	42913682	42913830	61.33	5.49e-29	26.1	9.27e-22
chr1-508	chr1	58507369	58507517	58.26	3.36e-27	30.11	6.93e-22
chr1-509	chr1	59472678	59472826	58.26	3.36e-27	18.33	6.08e-18
chr1-51	chr1	71646086	71646234	199.33	2.04e-123	42.42	2.99e-80
chr1-510	chr1	74179721	74179869	14.57	3.72e-16	45.17	3.86e-25
chr1-511	chr1	78489186	78489334	9.2	4.34e-12	39.94	5.85e-23
chr1-512	chr1	86187916	86188064	13.8	5.44e-15	19.33	1.71e-17
chr1-514	chr1	91311458	91311606	29.13	1.27e-21	33.28	1.1e-22
chr1-515	chr1	91920295	91920443	30.67	4.15e-23	44.38	3.13e-26
chr1-516	chr1	92707587	92707735	55.2	1.96e-25	52.1	5.44e-25
chr1-517	chr1	101628623	101628771	30.67	4.15e-23	95.1	9.55e-33
chr1-518	chr1	105491537	105491685	30.67	4.15e-23	25.6	1.35e-21
chr1-519	chr1	125972099	125972247	61.33	5.49e-29	102.41	2.2e-33
chr1-52	chr1	78119994	78120142	199.33	2.04e-123	127.26	7.87e-111
chr1-520	chr1	134492430	134492578	15.33	2.42e-17	28.94	1.27e-22
chr1-521	chr1	135368381	135368529	4.16	3.74e-07	32.43	1.77e-22
chr1-522	chr1	153376649	153376797	29.13	1.27e-21	16.22	5.5e-17
chr1-523	chr1	154081171	154081319	14.57	3.72e-16	15.81	8.64e-17
chr1-524	chr1	156979854	156980002	29.13	1.27e-21	20.08	1.12e-18
chr1-525	chr1	156994893	156995041	30.67	4.15e-23	19.87	1.8e-19
chr1-526	chr1	188639761	188639909	61.33	5.49e-29	88.76	3.74e-32
chr1-527	chr1	189761606	189761754	27.6	3.71e-20	24.45	3.01e-19
chr1-528	chr1	192764710	192764858	29.13	1.27e-21	60.23	1.81e-27
chr1-529	chr1	7052410	7052558	29.13	1.27e-21	18.33	6.08e-18
chr1-53	chr1	150497044	150497192	99.66	5.43e-104	77.27	6.89e-97
chr1-530	chr1	11082236	11082384	55.2	1.96e-25	79.88	2.8e-28
chr1-531	chr1	12814595	12814743	13.03	7.53e-14	12.72	1.11e-13
chr1-532	chr1	13132101	13132249	58.26	3.36e-27	14.05	7.02e-16
chr1-533	chr1	13599937	13600085	9.2	4.34e-12	59.91	4.6e-26
chr1-534	chr1	33555778	33555926	29.13	1.27e-21	63.24	7.28e-28
chr1-535	chr1	34003064	34003212	14.57	3.72e-16	6.26	6.72e-10
chr1-536	chr1	42713441	42713589	55.2	1.96e-25	54.46	2.48e-25
chr1-537	chr1	47007130	47007278	13.8	5.44e-15	49.93	1.15e-24
chr1-538	chr1	57989029	57989177	27.6	3.71e-20	33.28	1.42e-21
chr1-539	chr1	69867898	69868046	27.6	3.71e-20	79.88	2.8e-28
chr1-54	chr1	160209957	160210105	50.6	2.11e-86	52.3	2.46e-87
chr1-540	chr1	72214082	72214230	4.6	1.81e-07	15.17	1.11e-15
chr1-541	chr1	77440558	77440706	9.71	4.45e-13	25.81	1.17e-20
chr1-542	chr1	77451650	77451798	55.2	1.96e-25	9.08	5.39e-12
chr1-543	chr1	78228771	78228919	29.13	1.27e-21	180.68	1.92e-36
chr1-544	chr1	78509763	78509911	14.57	3.72e-16	34.18	6.72e-23
chr1-545	chr1	82948715	82948863	27.6	3.71e-20	79.88	2.8e-28
chr1-546	chr1	84890231	84890379	13.8	5.44e-15	23.49	6e-19
chr1-547	chr1	86752160	86752308	27.6	3.71e-20	42.79	1.74e-23
chr1-548	chr1	87224923	87225071	55.2	1.96e-25	6.69	6.67e-10
chr1-549	chr1	88800548	88800696	9.71	4.45e-13	26.91	5.45e-21
chr1-55	chr1	166125281	166125429	33.73	4.64e-75	37.23	8.22e-78
chr1-550	chr1	89870762	89870910	29.13	1.27e-21	19.16	2.59e-18
chr1-551	chr1	96483024	96483172	14.57	3.72e-16	74.4	3.47e-29
chr1-552	chr1	96746867	96747015	49.06	5.64e-22	71.01	1.69e-24
chr1-553	chr1	108548767	108548915	55.2	1.96e-25	47.93	2.37e-24
chr1-554	chr1	117290865	117291013	58.26	3.36e-27	35.13	4.05e-23
chr1-555	chr1	119388762	119388910	27.6	3.71e-20	37.44	1.81e-22
chr1-556	chr1	119565908	119566056	13.8	5.44e-15	52.1	5.44e-25
chr1-557	chr1	136470722	136470870	26.07	1.02e-18	27.6	4.01e-19
chr1-558	chr1	136646375	136646523	55.2	1.96e-25	33.28	1.42e-21
chr1-56	chr1	177753585	177753733	202.39	1.01e-125	125.53	4.06e-112
chr1-560	chr1	149074837	149074985	27.6	3.71e-20	99.85	5.27e-30
chr1-561	chr1	151712893	151713041	29.13	1.27e-21	52.7	2.19e-26
chr1-562	chr1	152817467	152817615	24.53	2.67e-17	23.15	6.47e-17
chr1-563	chr1	153316392	153316540	14.57	3.72e-16	23.42	6.86e-20
chr1-564	chr1	155484313	155484461	58.26	3.36e-27	45.17	3.86e-25
chr1-565	chr1	156938783	156938931	13.8	5.44e-15	29.22	1.37e-20
chr1-566	chr1	158362090	158362238	27.6	3.71e-20	54.46	2.48e-25
chr1-567	chr1	166164709	166164857	58.26	3.36e-27	50.59	4.68e-26
chr1-568	chr1	169834620	169834768	27.6	3.71e-20	44.38	9.19e-24
chr1-569	chr1	173348641	173348789	27.6	3.71e-20	27.87	3.14e-20
chr1-57	chr1	11396117	11396265	32.71	5.2e-72	54.62	6.32e-86
chr1-570	chr1	174172619	174172767	27.6	3.71e-20	54.46	2.48e-25
chr1-572	chr1	185829561	185829709	55.2	1.96e-25	85.59	8.2e-29
chr1-573	chr1	186567538	186567686	58.26	3.36e-27	40.8	2.55e-24
chr1-574	chr1	186976880	186977028	55.2	1.96e-25	28.53	2.09e-20
chr1-575	chr1	187233429	187233577	58.26	3.36e-27	74.4	3.47e-29
chr1-576	chr1	188995698	188995846	9.2	4.34e-12	9.22	4.21e-12
chr1-577	chr1	5134830	5134978	52.13	1.08e-23	56.58	2.76e-24
chr1-578	chr1	7451825	7451973	13.03	7.53e-14	32.33	2.98e-20
chr1-579	chr1	13128107	13128255	13.03	7.53e-14	10.58	1.97e-12
chr1-58	chr1	54484899	54485047	196.26	4.07e-121	33.03	2.86e-72
chr1-580	chr1	14650486	14650634	27.6	3.71e-20	70.48	2.58e-27
chr1-581	chr1	17531393	17531541	55.2	1.96e-25	70.48	2.58e-27
chr1-582	chr1	26340642	26340790	26.07	1.02e-18	94.3	5.26e-28
chr1-583	chr1	30415074	30415222	55.2	1.96e-25	49.93	1.15e-24
chr1-584	chr1	40680204	40680352	55.2	1.96e-25	33.28	1.42e-21
chr1-585	chr1	45358154	45358302	26.07	1.02e-18	23.58	5.27e-18
chr1-586	chr1	46863668	46863816	24.53	2.67e-17	46.31	1.4e-21
chr1-587	chr1	57343775	57343923	26.07	1.02e-18	29.02	1.77e-19
chr1-588	chr1	63138573	63138721	26.07	1.02e-18	9.76	6.86e-12
chr1-589	chr1	64415983	64416131	26.07	1.02e-18	43.52	2.18e-22
chr1-59	chr1	136727950	136728098	33.22	1.57e-73	42.42	2.99e-80
chr1-590	chr1	69460052	69460200	52.13	1.08e-23	34.29	1.13e-20
chr1-591	chr1	72797391	72797539	49.06	5.64e-22	23.15	6.47e-17
chr1-592	chr1	74344264	74344412	24.53	2.67e-17	25.98	1.11e-17
chr1-593	chr1	74386917	74387065	13.8	5.44e-15	17.37	1.12e-16
chr1-594	chr1	74455748	74455896	11.5	1.22e-11	43.41	6.46e-20
chr1-595	chr1	75902090	75902238	52.13	1.08e-23	49.2	2.84e-23
chr1-596	chr1	80236240	80236388	26.07	1.02e-18	8.26	8.64e-11
chr1-597	chr1	89931141	89931289	8.69	4.02e-11	8.51	5.52e-11
chr1-598	chr1	99907926	99908074	24.53	2.67e-17	88.76	4.96e-26
chr1-599	chr1	118459476	118459624	6.9	4.17e-10	24.45	3.01e-19
chr1-6	chr1	133667757	133667905	174.79	1.41e-208	58.37	7.79e-155
chr1-60	chr1	6870547	6870695	32.2	1.7e-70	119.82	7.68e-106
chr1-600	chr1	119470844	119470992	55.2	1.96e-25	33.28	1.42e-21
chr1-601	chr1	120643974	120644122	24.53	2.67e-17	21.74	1.7e-16
chr1-602	chr1	133852343	133852491	49.06	5.64e-22	15.22	3.98e-14
chr1-603	chr1	134405793	134405941	5.21	7e-08	33.28	1.85e-20
chr1-604	chr1	134955956	134956104	6.52	2.9e-09	51.44	1.35e-23
chr1-605	chr1	148853832	148853980	55.2	1.96e-25	92.17	2.19e-29
chr1-606	chr1	172455481	172455629	13.03	7.53e-14	19.51	1.13e-16
chr1-607	chr1	176028519	176028667	55.2	1.96e-25	37.44	1.81e-22
chr1-608	chr1	182018335	182018483	13.03	7.53e-14	14.15	2.06e-14
chr1-609	chr1	192846957	192847105	27.6	3.71e-20	42.79	1.74e-23
chr1-61	chr1	153037782	153037930	32.2	1.7e-70	47.12	1.19e-80
chr1-610	chr1	10650754	10650902	49.06	5.64e-22	48.41	6.96e-22
chr1-611	chr1	13104040	13104188	13.03	7.53e-14	19.18	1.49e-16
chr1-612	chr1	14001147	14001295	24.53	2.67e-17	40.96	9.49e-21
chr1-613	chr1	18287431	18287579	49.06	5.64e-22	56.06	6.97e-23
chr1-614	chr1	35995932	35996080	13.03	7.53e-14	51.44	1.35e-23
chr1-615	chr1	36768713	36768861	6.52	2.9e-09	24.6	2.63e-18
chr1-616	chr1	39900703	39900851	49.06	5.64e-22	7.83	6.48e-10
chr1-617	chr1	43571233	43571381	49.06	5.64e-22	44.38	2.72e-21
chr1-618	chr1	44891739	44891887	24.53	2.67e-17	29.59	1.49e-18
chr1-619	chr1	45359753	45359901	49.06	5.64e-22	21.74	1.7e-16
chr1-62	chr1	173389945	173390093	24.15	6.66e-63	182.34	2.99e-117
chr1-620	chr1	51152770	51152918	49.06	5.64e-22	62.65	1.21e-23
chr1-621	chr1	54052949	54053097	49.06	5.64e-22	53.25	1.56e-22
chr1-622	chr1	57333754	57333902	26.07	1.02e-18	24.08	3.74e-18
chr1-623	chr1	57369228	57369376	24.53	2.67e-17	32.28	3.87e-19
chr1-624	chr1	59376120	59376268	13.03	7.53e-14	6.12	7.25e-09
chr1-625	chr1	59663489	59663637	49.06	5.64e-22	29.59	1.49e-18
chr1-626	chr1	59728611	59728759	6.13	1.91e-08	50.72	3.35e-22
chr1-627	chr1	71531738	71531886	24.53	2.67e-17	50.72	3.35e-22
chr1-628	chr1	77453971	77454119	13.03	7.53e-14	7.21	6.61e-10
chr1-629	chr1	77461797	77461945	6.52	2.9e-09	12.86	9.3e-14
chr1-63	chr1	12836137	12836285	46.76	5.99e-78	60.61	1.09e-84
chr1-630	chr1	84405653	84405801	52.13	1.08e-23	49.2	2.84e-23
chr1-631	chr1	85929567	85929715	24.53	2.67e-17	38.04	3.01e-20
chr1-632	chr1	87673969	87674117	52.13	1.08e-23	19.85	8.54e-17
chr1-633	chr1	89821504	89821652	26.07	1.02e-18	49.2	2.84e-23
chr1-634	chr1	90543933	90544081	49.06	5.64e-22	22.19	1.24e-16
chr1-635	chr1	92119414	92119562	26.07	1.02e-18	47.15	5.76e-23
chr1-636	chr1	95743257	95743405	52.13	1.08e-23	113.16	2.44e-29
chr1-637	chr1	101773684	101773832	13.03	7.53e-14	75.44	2.23e-26
chr1-638	chr1	118388823	118388971	6.52	2.9e-09	23.58	5.27e-18
chr1-64	chr1	186922888	186923036	95.06	5.13e-98	51.59	8.67e-82
chr1-640	chr1	125688098	125688246	24.53	2.67e-17	30.43	9.64e-19
chr1-641	chr1	127235251	127235399	12.27	9.86e-13	17.18	6.04e-15
chr1-642	chr1	127239073	127239221	24.53	2.67e-17	16.64	9.74e-15
chr1-643	chr1	133033716	133033864	7.67	2.9e-09	22.19	1.09e-15
chr1-644	chr1	133129455	133129603	6.13	1.91e-08	13.15	3.52e-13
chr1-645	chr1	136695044	136695192	4.6	1.84e-06	6.79	1.41e-08
chr1-646	chr1	160218048	160218196	49.06	5.64e-22	18.05	2.86e-15
chr1-647	chr1	160651692	160651840	49.06	5.64e-22	23.67	4.62e-17
chr1-648	chr1	161039800	161039948	7.16	2.24e-08	8.88	1.56e-09
chr1-649	chr1	172310183	172310331	5.21	7e-08	15.29	5.96e-15
chr1-65	chr1	86309357	86309505	46	2.8e-76	11.75	2.47e-42
chr1-650	chr1	173561904	173562052	26.07	1.02e-18	87.05	2.02e-27
chr1-651	chr1	174426690	174426838	52.13	1.08e-23	75.44	2.23e-26
chr1-652	chr1	179272357	179272505	24.53	2.67e-17	11.58	2.31e-12
chr1-655	chr1	182103553	182103701	11.5	1.22e-11	16.11	1.04e-13
chr1-656	chr1	184019408	184019556	13.03	7.53e-14	21.35	2.63e-17
chr1-657	chr1	187282519	187282667	24.53	2.67e-17	56.06	6.97e-23
chr1-658	chr1	187578223	187578371	23	6.55e-16	43.41	6.46e-20
chr1-66	chr1	118625515	118625663	190.13	1.54e-116	33.83	1.07e-70
chr1-660	chr1	191616338	191616486	23	6.55e-16	34.43	1.91e-18
chr1-661	chr1	191698545	191698693	24.53	2.67e-17	44.38	2.72e-21
chr1-662	chr1	192522905	192523053	24.53	2.67e-17	29.59	1.49e-18
chr1-663	chr1	5158685	5158833	49.06	5.64e-22	62.65	1.21e-23
chr1-664	chr1	7319313	7319461	11.5	1.22e-11	26.99	6.55e-17
chr1-665	chr1	10031785	10031933	6.13	1.91e-08	53.25	1.56e-22
chr1-666	chr1	12990294	12990442	7.67	2.9e-09	9.6	1.43e-10
chr1-667	chr1	16824840	16824988	49.06	5.64e-22	31.33	6.15e-19
chr1-668	chr1	18030289	18030437	46	2.77e-20	55.47	1.76e-21
chr1-669	chr1	19107412	19107560	24.53	2.67e-17	20.88	3.13e-16
chr1-67	chr1	140429416	140429564	93.53	4.88e-96	73.83	7.56e-90
chr1-670	chr1	30549142	30549290	12.27	9.86e-13	32.28	3.87e-19
chr1-671	chr1	36557138	36557286	11.5	1.22e-11	19.58	6.54e-15
chr1-673	chr1	38319925	38320073	46	2.77e-20	55.47	1.76e-21
chr1-674	chr1	38797070	38797218	46	2.77e-20	22.19	1.09e-15
chr1-675	chr1	43820760	43820908	46	2.77e-20	22.19	1.09e-15
chr1-676	chr1	45866105	45866253	46	2.77e-20	38.4	3.89e-19
chr1-677	chr1	51742594	51742742	23	6.55e-16	25.6	1.4e-16
chr1-678	chr1	54555511	54555659	12.27	9.86e-13	30.43	9.64e-19
chr1-679	chr1	55131833	55131981	46	2.77e-20	15.36	2.01e-13
chr1-68	chr1	172418321	172418469	15.33	9.14e-49	147.93	2.45e-106
chr1-680	chr1	56844609	56844757	46	2.77e-20	66.57	1.2e-22
chr1-681	chr1	58958032	58958180	7.16	2.24e-08	21.67	1.32e-14
chr1-683	chr1	63201768	63201916	23	6.55e-16	15.13	2.5e-13
chr1-684	chr1	72244382	72244530	10.73	1.41e-10	7.34	1.65e-08
chr1-685	chr1	72490875	72491023	49.06	5.64e-22	35.5	8.82e-20
chr1-686	chr1	72960398	72960546	49.06	5.64e-22	17.18	6.04e-15
chr1-687	chr1	74308417	74308565	46	2.77e-20	10.4	4.82e-11
chr1-688	chr1	74507882	74508030	24.53	2.67e-17	15	4.92e-14
chr1-689	chr1	74893188	74893336	24.53	2.67e-17	24.77	2.3e-17
chr1-69	chr1	42058623	42058771	93.53	4.88e-96	109.75	3.12e-100
chr1-690	chr1	75997295	75997443	24.53	2.67e-17	106.51	2.77e-27
chr1-691	chr1	78420433	78420581	49.06	5.64e-22	34.36	1.47e-19
chr1-692	chr1	79602613	79602761	5.75	1.18e-07	43.41	6.46e-20
chr1-693	chr1	81577733	81577881	24.53	2.67e-17	96.83	1.25e-26
chr1-694	chr1	82841052	82841200	23	6.55e-16	20.38	3.7e-15
chr1-695	chr1	84631300	84631448	23	6.55e-16	36.98	6.74e-19
chr1-696	chr1	84860819	84860967	23	6.55e-16	14.47	4.97e-13
chr1-697	chr1	86587008	86587156	4.6	1.84e-06	19.97	4.93e-15
chr1-698	chr1	88995959	88996107	42.93	1.27e-18	29.12	2.5e-16
chr1-699	chr1	114641978	114642126	11.5	1.22e-11	23.77	4.07e-16
chr1-7	chr1	15791705	15791853	28.88	8.38e-120	58.77	8.12e-154
chr1-70	chr1	87226522	87226670	46.76	5.99e-78	22.19	8.14e-59
chr1-700	chr1	121123487	121123635	46	2.77e-20	32.21	5.04e-18
chr1-701	chr1	123801600	123801748	46	2.77e-20	32.21	5.04e-18
chr1-702	chr1	128001099	128001247	23	6.55e-16	34.43	1.91e-18
chr1-703	chr1	131747470	131747618	46	2.77e-20	16.64	6.54e-14
chr1-704	chr1	132197844	132197992	46	2.77e-20	6.61	1.99e-08
chr1-705	chr1	133095534	133095682	46	2.77e-20	33.28	3.13e-18
chr1-706	chr1	133347111	133347259	46	2.77e-20	26.28	9.62e-17
chr1-707	chr1	134573727	134573875	12.27	9.86e-13	11.45	2.71e-12
chr1-708	chr1	134775133	134775281	46	2.77e-20	31.2	8e-18
chr1-709	chr1	135637798	135637946	8.18	3.52e-10	21.3	2.31e-16
chr1-71	chr1	133694561	133694709	88.93	3.8e-90	37.48	9.2e-69
chr1-710	chr1	138154221	138154369	23	6.55e-16	58.74	7.59e-22
chr1-711	chr1	150115668	150115816	46	2.77e-20	30.26	1.25e-17
chr1-712	chr1	150805557	150805705	12.27	9.86e-13	118.34	5.2e-28
chr1-713	chr1	151544685	151544833	24.53	2.67e-17	21.3	2.31e-16
chr1-714	chr1	151998052	151998200	49.06	5.64e-22	40.96	9.49e-21
chr1-715	chr1	152414729	152414877	42.93	1.27e-18	32.14	6.58e-17
chr1-716	chr1	152603781	152603929	23	6.55e-16	39.94	2.19e-19
chr1-717	chr1	153320729	153320877	24.53	2.67e-17	15.9	2.06e-14
chr1-718	chr1	157458439	157458587	4.91	3.7e-07	15	4.92e-14
chr1-719	chr1	158294985	158295133	24.53	2.67e-17	36.73	5.2e-20
chr1-72	chr1	135507890	135508038	90.46	4.2e-92	45.67	7.4e-75
chr1-720	chr1	160734872	160735020	11.5	1.22e-11	35.66	1.15e-18
chr1-721	chr1	170868555	170868703	8.18	3.52e-10	14.39	9.15e-14
chr1-722	chr1	171501660	171501808	49.06	5.64e-22	11.45	2.71e-12
chr1-723	chr1	172261835	172261983	11.5	1.22e-11	49.93	8.31e-21
chr1-724	chr1	177165940	177166088	39.87	5.47e-17	72.11	2.85e-20
chr1-725	chr1	179266957	179267105	46	2.77e-20	35.66	1.15e-18
chr1-726	chr1	182528439	182528587	12.27	9.86e-13	28.03	3.43e-18
chr1-727	chr1	10879986	10880134	7.67	2.9e-09	11.75	9.06e-12
chr1-728	chr1	11401348	11401496	42.93	1.27e-18	22.73	7e-15
chr1-729	chr1	12954306	12954454	42.93	1.27e-18	77.66	3.67e-22
chr1-73	chr1	25181970	25182118	88.93	3.8e-90	52.17	6.61e-77
chr1-730	chr1	12991632	12991780	21.47	1.51e-14	8.79	1.76e-09
chr1-731	chr1	14225594	14225742	46	2.77e-20	52.55	3.91e-21
chr1-732	chr1	17932159	17932307	16.87	1.19e-10	18.78	3.89e-11
chr1-733	chr1	22466765	22466913	23	6.55e-16	45.39	3.37e-20
chr1-734	chr1	26907977	26908125	42.93	1.27e-18	116.49	1.33e-24
chr1-735	chr1	30847822	30847970	42.93	1.27e-18	35.84	1.49e-17
chr1-736	chr1	35978956	35979104	21.47	1.51e-14	23.3	5.03e-15
chr1-738	chr1	38291656	38291804	11.5	1.22e-11	62.41	3.1e-22
chr1-739	chr1	46858489	46858637	21.47	1.51e-14	25.89	1.22e-15
chr1-74	chr1	34103245	34103393	92	4.56e-94	26.81	1.32e-62
chr1-740	chr1	46916438	46916586	23	6.55e-16	55.47	1.76e-21
chr1-741	chr1	52009128	52009276	23	6.55e-16	14.68	4.05e-13
chr1-742	chr1	58366994	58367142	11.5	1.22e-11	13.87	9.02e-13
chr1-743	chr1	59585168	59585316	23	6.55e-16	43.41	6.46e-20
chr1-744	chr1	60056434	60056582	42.93	1.27e-18	84.72	1.1e-22
chr1-745	chr1	62927527	62927675	46	2.77e-20	49.93	8.31e-21
chr1-746	chr1	63213912	63214060	23	6.55e-16	13.14	1.92e-12
chr1-747	chr1	64207251	64207399	23	6.55e-16	71.32	4.32e-23
chr1-748	chr1	65292799	65292947	42.93	1.27e-18	42.36	1.53e-18
chr1-749	chr1	66266410	66266558	11.5	1.22e-11	62.41	3.1e-22
chr1-75	chr1	122607431	122607579	44.46	5.83e-73	62.27	2.72e-81
chr1-750	chr1	67970247	67970395	46	2.77e-20	27.74	4.41e-17
chr1-751	chr1	72583127	72583275	4.6	1.84e-06	22.19	1.09e-15
chr1-752	chr1	72827721	72827869	10.73	1.41e-10	8.47	2.79e-09
chr1-753	chr1	74307274	74307422	23	6.55e-16	10.4	4.82e-11
chr1-754	chr1	75704747	75704895	42.93	1.27e-18	29.12	2.5e-16
chr1-755	chr1	79775998	79776146	9.97	1.52e-09	57.69	4.95e-19
chr1-758	chr1	87722360	87722508	46	2.77e-20	38.4	3.89e-19
chr1-759	chr1	90202564	90202712	11.5	1.22e-11	12.33	4.65e-12
chr1-76	chr1	59426972	59427120	88.93	3.8e-90	20.43	5.04e-54
chr1-760	chr1	94895581	94895729	23	6.55e-16	76.81	1.44e-23
chr1-761	chr1	95602195	95602343	46	2.77e-20	58.74	7.59e-22
chr1-762	chr1	104815382	104815530	42.93	1.27e-18	54.82	4.46e-20
chr1-763	chr1	120080781	120080929	21.47	1.51e-14	19.42	5.73e-14
chr1-764	chr1	121842829	121842977	10.73	1.41e-10	49.05	2.05e-19
chr1-765	chr1	126377762	126377910	21.47	1.51e-14	49.05	2.05e-19
chr1-766	chr1	127167753	127167901	11.5	1.22e-11	47.55	1.7e-20
chr1-767	chr1	128061053	128061201	39.87	5.47e-17	41.21	3.59e-17
chr1-768	chr1	128244009	128244157	7.16	2.24e-08	35.84	1.49e-17
chr1-769	chr1	128344382	128344530	10.73	1.41e-10	71.69	1.11e-21
chr1-77	chr1	62783647	62783795	29.64	5.02e-63	58.5	9.61e-80
chr1-771	chr1	132322882	132323030	4.6	1.84e-06	17.83	2.47e-14
chr1-772	chr1	132800259	132800407	39.87	5.47e-17	16.33	3.74e-12
chr1-773	chr1	135343417	135343565	42.93	1.27e-18	11.09	9.2e-11
chr1-774	chr1	135600392	135600540	23	6.55e-16	47.55	1.7e-20
chr1-775	chr1	136690228	136690376	5.37	6.9e-07	11.8	4.18e-11
chr1-776	chr1	137738278	137738426	23	6.55e-16	45.39	3.37e-20
chr1-777	chr1	139425858	139426006	21.47	1.51e-14	33.28	4.09e-17
chr1-778	chr1	151235585	151235733	10.73	1.41e-10	49.05	2.05e-19
chr1-779	chr1	152413246	152413394	23	6.55e-16	32.21	5.04e-18
chr1-78	chr1	136427660	136427808	22.23	4.67e-56	82.15	3.59e-88
chr1-780	chr1	153009369	153009517	4.6	1.84e-06	16.37	8.25e-14
chr1-782	chr1	156268684	156268832	21.47	1.51e-14	25.89	1.22e-15
chr1-783	chr1	156614333	156614481	5.37	6.9e-07	16.07	6.97e-13
chr1-784	chr1	159342424	159342572	46	2.77e-20	49.93	8.31e-21
chr1-786	chr1	164471011	164471159	11.5	1.22e-11	25.6	1.4e-16
chr1-787	chr1	167271319	167271467	11.5	1.22e-11	12.03	6.52e-12
chr1-789	chr1	170063074	170063222	23	6.55e-16	39.94	2.19e-19
chr1-79	chr1	178850678	178850826	87.4	3.38e-88	84.32	2.55e-87
chr1-790	chr1	171380024	171380172	11.5	1.22e-11	25.6	1.4e-16
chr1-791	chr1	171503367	171503515	10.73	1.41e-10	9.05	1.23e-09
chr1-792	chr1	178307627	178307775	46	2.77e-20	58.74	7.59e-22
chr1-794	chr1	181948269	181948417	46	2.77e-20	27.74	4.41e-17
chr1-795	chr1	182245328	182245476	42.93	1.27e-18	71.69	1.11e-21
chr1-796	chr1	185208761	185208909	46	2.77e-20	15.13	2.5e-13
chr1-797	chr1	187452261	187452409	10.73	1.41e-10	25.19	1.77e-15
chr1-798	chr1	187604224	187604372	9.97	1.52e-09	22.19	8.56e-14
chr1-799	chr1	4881998	4882146	42.93	1.27e-18	46.6	4.15e-19
chr1-8	chr1	52953604	52953752	167.13	2.11e-197	51.46	2.87e-142
chr1-80	chr1	119076172	119076320	84.33	2.54e-84	28.38	7.46e-59
chr1-800	chr1	4934146	4934294	18.4	6.44e-12	23.49	3.95e-13
chr1-801	chr1	8496354	8496502	42.93	1.27e-18	38.83	5.02e-18
chr1-802	chr1	9953694	9953842	10.73	1.41e-10	11.09	9.2e-11
chr1-803	chr1	12636926	12637074	21.47	1.51e-14	34.52	2.49e-17
chr1-804	chr1	12810476	12810624	42.93	1.27e-18	9.14	1.08e-09
chr1-805	chr1	15815066	15815214	42.93	1.27e-18	27.41	5.66e-16
chr1-806	chr1	30584980	30585128	19.93	3.23e-13	57.69	4.95e-19
chr1-807	chr1	34066557	34066705	18.4	6.44e-12	10.79	2.67e-09
chr1-808	chr1	34140190	34140338	6.64	1.62e-07	15.45	7.32e-12
chr1-809	chr1	34883867	34884015	21.47	1.51e-14	77.66	3.67e-22
chr1-81	chr1	137378681	137378829	177.86	1.83e-107	154.44	6.27e-104
chr1-811	chr1	36898976	36899124	4.98	3.75e-06	18.81	6.59e-13
chr1-813	chr1	42186394	42186542	42.93	1.27e-18	66.57	3.08e-21
chr1-814	chr1	47103085	47103233	36.8	2.18e-15	49.93	6.1e-17
chr1-815	chr1	51906623	51906771	18.4	6.44e-12	31.95	1.13e-14
chr1-817	chr1	57612355	57612503	10.73	1.41e-10	17.26	2.72e-13
chr1-818	chr1	62650712	62650860	36.8	2.18e-15	33.28	7.02e-15
chr1-819	chr1	64009167	64009315	36.8	2.18e-15	27.55	6.31e-14
chr1-82	chr1	171319803	171319951	21.85	1.04e-54	99.85	1.85e-91
chr1-820	chr1	64305656	64305804	9.97	1.52e-09	22.77	6.2e-14
chr1-821	chr1	64311577	64311725	9.97	1.52e-09	41.21	3.59e-17
chr1-822	chr1	64695271	64695419	42.93	1.27e-18	31.06	1.04e-16
chr1-824	chr1	64982365	64982513	10.73	1.41e-10	35.84	1.49e-17
chr1-825	chr1	71610299	71610447	42.93	1.27e-18	20.26	3.25e-14
chr1-827	chr1	74245635	74245783	39.87	5.47e-17	33.28	5.35e-16
chr1-828	chr1	75784537	75784685	39.87	5.47e-17	41.21	3.59e-17
chr1-829	chr1	77502959	77503107	9.2	1.53e-08	11.25	1.7e-09
chr1-83	chr1	181953690	181953838	21.85	1.04e-54	74.4	2.92e-84
chr1-830	chr1	77504939	77505087	39.87	5.47e-17	13.11	5.33e-11
chr1-831	chr1	82820779	82820927	18.4	6.44e-12	15.36	4.94e-11
chr1-832	chr1	82867049	82867197	21.47	1.51e-14	35.84	1.49e-17
chr1-833	chr1	86024532	86024680	42.93	1.27e-18	27.41	5.66e-16
chr1-834	chr1	88957625	88957773	6.64	1.62e-07	21.63	1.17e-13
chr1-835	chr1	89003885	89004033	21.47	1.51e-14	49.05	2.05e-19
chr1-836	chr1	89025260	89025408	10.73	1.41e-10	22.73	7e-15
chr1-837	chr1	89072713	89072861	10.73	1.41e-10	16.64	4.4e-13
chr1-838	chr1	91038762	91038910	21.47	1.51e-14	21.67	1.32e-14
chr1-839	chr1	91962379	91962527	21.47	1.51e-14	33.28	4.09e-17
chr1-84	chr1	192834755	192834903	29.13	1.49e-61	97.29	7.99e-91
chr1-840	chr1	92348276	92348424	19.93	3.23e-13	18.41	8.59e-13
chr1-841	chr1	104653925	104654073	36.8	2.18e-15	38.04	1.48e-15
chr1-844	chr1	119399075	119399223	10.73	1.41e-10	20.26	3.25e-14
chr1-845	chr1	126072779	126072927	39.87	5.47e-17	61.81	2.05e-19
chr1-846	chr1	128398823	128398971	21.47	1.51e-14	12.26	2.53e-11
chr1-847	chr1	130502602	130502750	21.47	1.51e-14	93.19	2.94e-23
chr1-848	chr1	132263585	132263733	36.8	2.18e-15	9.86	7.18e-09
chr1-85	chr1	39902852	39903000	81.26	1.77e-80	30.68	1.65e-58
chr1-850	chr1	133492590	133492738	6.64	1.62e-07	10.55	7.72e-10
chr1-851	chr1	134063089	134063237	10.73	1.41e-10	10.96	1.07e-10
chr1-852	chr1	135198486	135198634	6.64	1.62e-07	9.11	4.37e-09
chr1-853	chr1	135199025	135199173	9.97	1.52e-09	9.51	2.64e-09
chr1-855	chr1	136662017	136662165	21.47	1.51e-14	15.03	1.67e-12
chr1-856	chr1	136945491	136945639	9.97	1.52e-09	11.69	2.27e-10
chr1-857	chr1	136957575	136957723	4.98	3.75e-06	8.57	8.91e-09
chr1-858	chr1	139499986	139500134	39.87	5.47e-17	13.31	4.44e-11
chr1-859	chr1	143265302	143265450	10.73	1.41e-10	116.49	1.33e-24
chr1-86	chr1	57470483	57470631	17.48	1.83e-49	75.89	9.58e-85
chr1-860	chr1	148823266	148823414	39.87	5.47e-17	66.57	7.94e-20
chr1-863	chr1	160309035	160309183	9.2	1.53e-08	6.1	1.16e-06
chr1-864	chr1	160400765	160400913	21.47	1.51e-14	49.05	2.05e-19
chr1-865	chr1	164482084	164482232	9.97	1.52e-09	54.09	1.13e-18
chr1-866	chr1	165642062	165642210	39.87	5.47e-17	17.31	1.84e-12
chr1-867	chr1	165772141	165772289	10.73	1.41e-10	17.92	1.65e-13
chr1-868	chr1	167059590	167059738	9.97	1.52e-09	57.69	4.95e-19
chr1-869	chr1	167093693	167093841	7.16	2.24e-08	62.13	7.97e-21
chr1-87	chr1	100878159	100878307	43.7	2.59e-71	80.73	2.95e-86
chr1-870	chr1	167290047	167290195	5.62	6.79e-06	8.72	1.02e-07
chr1-871	chr1	167599289	167599437	42.93	1.27e-18	26.63	8.37e-16
chr1-872	chr1	167635419	167635567	21.47	1.51e-14	18.64	9.85e-14
chr1-873	chr1	167937962	167938110	42.93	1.27e-18	40.52	2.81e-18
chr1-874	chr1	171904117	171904265	4.6	1.9e-05	33.28	7.02e-15
chr1-875	chr1	174728991	174729139	39.87	5.47e-17	50.9	2.44e-18
chr1-876	chr1	176634320	176634468	39.87	5.47e-17	37.63	1.14e-16
chr1-877	chr1	179578826	179578974	21.47	1.51e-14	37.28	8.75e-18
chr1-878	chr1	180279886	180280034	6.64	1.62e-07	19.23	5.03e-13
chr1-879	chr1	180286285	180286433	21.47	1.51e-14	25.89	1.22e-15
chr1-88	chr1	3482949	3483097	168.66	9.75e-101	70.41	4.55e-80
chr1-880	chr1	180979616	180979764	19.93	3.23e-13	13.31	4.44e-11
chr1-881	chr1	184024035	184024183	42.93	1.27e-18	18.27	1.28e-13
chr1-882	chr1	185191055	185191203	18.4	6.44e-12	22.19	7.61e-13
chr1-883	chr1	185726917	185727065	42.93	1.27e-18	44.38	8.09e-19
chr1-884	chr1	190363478	190363626	42.93	1.27e-18	38.83	5.02e-18
chr1-885	chr1	191819172	191819320	21.47	1.51e-14	13.71	5.97e-12
chr1-886	chr1	193466396	193466544	42.93	1.27e-18	54.82	4.46e-20
chr1-887	chr1	193510084	193510232	6.13	1.09e-06	11.25	1.7e-09
chr1-888	chr1	193656990	193657138	42.93	1.27e-18	38.83	5.02e-18
chr1-889	chr1	194746813	194746961	39.87	5.47e-17	28.85	3.24e-15
chr1-89	chr1	52864366	52864514	42.16	4.87e-68	140.82	1.87e-96
chr1-890	chr1	3343577	3343725	39.87	5.47e-17	39.34	6.48e-17
chr1-891	chr1	4855458	4855606	8.43	1.42e-07	9.15	6.32e-08
chr1-892	chr1	6448189	6448337	6.13	1.09e-06	6.05	1.25e-06
chr1-893	chr1	9909217	9909365	36.8	2.18e-15	39.94	8.36e-16
chr1-894	chr1	9953112	9953260	18.4	6.44e-12	9.08	1.76e-08
chr1-895	chr1	10095231	10095379	4.98	3.75e-06	66.57	7.94e-20
chr1-896	chr1	12580213	12580361	36.8	2.18e-15	22.82	5.51e-13
chr1-897	chr1	12782559	12782707	19.93	3.23e-13	48.08	5.06e-18
chr1-898	chr1	12791373	12791521	19.93	3.23e-13	20.6	2.15e-13
chr1-899	chr1	12886874	12887022	6.13	1.09e-06	44.38	2.43e-16
chr1-9	chr1	135677068	135677216	82.03	5e-161	74.2	2.02e-156
chr1-90	chr1	143734131	143734279	85.86	2.95e-86	26.25	4.61e-58
chr1-900	chr1	13872547	13872695	33.73	8.02e-14	56.33	3.25e-16
chr1-901	chr1	17250759	17250907	18.4	6.44e-12	24.96	1.97e-13
chr1-902	chr1	18639434	18639582	39.87	5.47e-17	37.63	1.14e-16
chr1-903	chr1	26527901	26528049	18.4	6.44e-12	46.99	1.24e-16
chr1-904	chr1	33271582	33271730	19.93	3.23e-13	48.08	5.06e-18
chr1-905	chr1	33281512	33281660	39.87	5.47e-17	61.81	2.05e-19
chr1-907	chr1	34183618	34183766	9.2	1.53e-08	46.99	1.24e-16
chr1-908	chr1	34739835	34739983	16.87	1.19e-10	36.61	3.34e-14
chr1-909	chr1	35385485	35385633	4.98	3.75e-06	123.63	2.78e-23
chr1-91	chr1	170477787	170477935	168.66	9.75e-101	77.9	1.89e-82
chr1-910	chr1	35822931	35823079	9.97	1.52e-09	21.63	1.17e-13
chr1-911	chr1	35841793	35841941	18.4	6.44e-12	19.97	2.54e-12
chr1-912	chr1	36907319	36907467	9.97	1.52e-09	21.63	1.17e-13
chr1-913	chr1	36939884	36940032	19.93	3.23e-13	10.55	7.72e-10
chr1-914	chr1	37890420	37890568	9.97	1.52e-09	39.34	6.48e-17
chr1-915	chr1	43186600	43186748	36.8	2.18e-15	19.02	4.42e-12
chr1-916	chr1	51845451	51845599	9.97	1.52e-09	39.34	6.48e-17
chr1-917	chr1	52431999	52432147	8.43	1.42e-07	24.41	2.49e-12
chr1-918	chr1	52631068	52631216	6.64	1.62e-07	45.55	1.01e-17
chr1-919	chr1	54817051	54817199	19.93	3.23e-13	78.67	9.32e-21
chr1-92	chr1	189916524	189916672	28.62	4.34e-60	54.03	3.79e-75
chr1-920	chr1	55131017	55131165	9.97	1.52e-09	13.11	5.33e-11
chr1-921	chr1	57301286	57301434	9.2	1.53e-08	30.72	1.78e-14
chr1-922	chr1	58362496	58362644	18.4	6.44e-12	13.77	1.67e-10
chr1-923	chr1	58769181	58769329	16.87	1.19e-10	33.28	9.25e-14
chr1-924	chr1	59697926	59698074	19.93	3.23e-13	22.77	6.2e-14
chr1-925	chr1	59969405	59969553	36.8	2.18e-15	57.06	1.27e-17
chr1-927	chr1	61418526	61418674	19.93	3.23e-13	29.84	2.11e-15
chr1-928	chr1	61481845	61481993	39.87	5.47e-17	54.09	1.13e-18
chr1-929	chr1	62772554	62772702	16.87	1.19e-10	6.31	2.3e-06
chr1-93	chr1	55108628	55108776	165.59	1.64e-98	55.3	4.51e-73
chr1-930	chr1	63107955	63108103	6.13	1.09e-06	10.79	2.67e-09
chr1-931	chr1	65068010	65068158	9.97	1.52e-09	33.28	5.35e-16
chr1-932	chr1	65179175	65179323	18.4	6.44e-12	24.21	2.8e-13
chr1-933	chr1	68304585	68304733	36.8	2.18e-15	27.55	6.31e-14
chr1-935	chr1	75479463	75479611	6.13	1.09e-06	12.68	4.18e-10
chr1-936	chr1	76036399	76036547	39.87	5.47e-17	19.23	5.03e-13
chr1-937	chr1	77673465	77673613	36.8	2.18e-15	61.45	5.28e-18
chr1-938	chr1	79449999	79450147	39.87	5.47e-17	25.45	1.55e-14
chr1-939	chr1	79454315	79454463	39.87	5.47e-17	26.22	1.07e-14
chr1-94	chr1	60851059	60851207	39.87	3.46e-63	27.92	2.23e-55
chr1-940	chr1	82820416	82820564	4.98	3.75e-06	17.66	1.43e-12
chr1-941	chr1	84640652	84640800	39.87	5.47e-17	12.02	1.64e-10
chr1-942	chr1	84961780	84961928	39.87	5.47e-17	288.46	4.86e-28
chr1-943	chr1	86178991	86179139	6.64	1.62e-07	20.13	2.87e-13
chr1-944	chr1	86434536	86434684	6.64	1.62e-07	27.04	7.27e-15
chr1-945	chr1	86550265	86550413	19.93	3.23e-13	48.08	5.06e-18
chr1-946	chr1	88279166	88279314	19.93	3.23e-13	7.59	3.59e-08
chr1-948	chr1	89078934	89079082	16.87	1.19e-10	27.12	8.16e-13
chr1-949	chr1	89282657	89282805	19.93	3.23e-13	48.08	5.06e-18
chr1-95	chr1	136675217	136675365	20.7	1.03e-50	17.53	5.04e-47
chr1-950	chr1	89923034	89923182	6.13	1.09e-06	9.86	7.18e-09
chr1-951	chr1	91136789	91136937	9.2	1.53e-08	31.95	1.13e-14
chr1-952	chr1	94298510	94298658	9.2	1.53e-08	88.76	6.8e-20
chr1-953	chr1	95030704	95030852	18.4	6.44e-12	26.63	9.34e-14
chr1-954	chr1	95273371	95273519	33.73	8.02e-14	43.07	5.85e-15
chr1-955	chr1	96876176	96876324	36.8	2.18e-15	8.88	2.25e-08
chr1-956	chr1	105759050	105759198	19.93	3.23e-13	57.69	4.95e-19
chr1-957	chr1	105903325	105903473	18.4	6.44e-12	29.59	2.76e-14
chr1-958	chr1	106620444	106620592	19.93	3.23e-13	61.81	2.05e-19
chr1-959	chr1	108985095	108985243	39.87	5.47e-17	123.63	2.78e-23
chr1-96	chr1	152973926	152974074	168.66	9.75e-101	60.02	2.58e-76
chr1-960	chr1	120204898	120205046	9.97	1.52e-09	72.11	2.85e-20
chr1-961	chr1	130251555	130251703	16.87	1.19e-10	33.28	9.25e-14
chr1-962	chr1	135217700	135217848	9.2	1.53e-08	19.97	2.54e-12
chr1-964	chr1	135724194	135724342	9.2	1.53e-08	15.07	6.11e-11
chr1-965	chr1	136940687	136940835	39.87	5.47e-17	16.64	2.97e-12
chr1-967	chr1	137174126	137174274	9.2	1.53e-08	15.98	3.18e-11
chr1-968	chr1	143311532	143311680	18.4	6.44e-12	46.99	1.24e-16
chr1-969	chr1	151778771	151778919	36.8	2.18e-15	66.57	2.05e-18
chr1-97	chr1	153590316	153590464	41.4	2.05e-66	52.86	5.02e-72
chr1-970	chr1	152790413	152790561	18.4	6.44e-12	10.24	4.76e-09
chr1-971	chr1	154100703	154100851	19.93	3.23e-13	27.04	7.27e-15
chr1-972	chr1	155073552	155073700	9.97	1.52e-09	26.22	1.07e-14
chr1-973	chr1	156512731	156512879	18.4	6.44e-12	36.31	2.55e-15
chr1-974	chr1	156667647	156667795	39.87	5.47e-17	7.04	8.52e-08
chr1-975	chr1	164576995	164577143	16.87	1.19e-10	19.79	2.25e-11
chr1-976	chr1	167069647	167069795	39.87	5.47e-17	39.34	6.48e-17
chr1-977	chr1	175692688	175692836	6.64	1.62e-07	21.11	1.59e-13
chr1-978	chr1	177321779	177321927	19.93	3.23e-13	36.06	1.95e-16
chr1-979	chr1	178664300	178664448	18.4	6.44e-12	42.04	4.59e-16
chr1-98	chr1	180571302	180571450	40.63	8.51e-65	39.2	5.43e-64
chr1-980	chr1	180979987	180980135	4.6	1.9e-05	12.29	5.91e-10
chr1-982	chr1	193538526	193538674	6.13	1.09e-06	9.4	1.21e-08
chr1-983	chr1	4396959	4397107	16.87	1.19e-10	45.77	3.05e-15
chr1-985	chr1	5461700	5461848	36.8	2.18e-15	42.04	4.59e-16
chr1-986	chr1	6441820	6441968	18.4	6.44e-12	36.31	2.55e-15
chr1-987	chr1	6760884	6761032	36.8	2.18e-15	39.94	8.36e-16
chr1-988	chr1	7591248	7591396	5.11	3.88e-05	21.47	8.3e-11
chr1-989	chr1	9629973	9630121	18.4	6.44e-12	23.49	3.95e-13
chr1-99	chr1	53823873	53824021	40.63	8.51e-65	78.4	1.16e-79
chr1-990	chr1	9889672	9889820	18.4	6.44e-12	46.99	1.24e-16
chr1-992	chr1	11467172	11467320	6.13	1.09e-06	42.04	4.59e-16
chr1-994	chr1	17982783	17982931	33.73	8.02e-14	34.87	5.63e-14
chr1-995	chr1	18268963	18269111	8.43	1.42e-07	52.3	7.23e-16
chr1-996	chr1	24164174	24164322	18.4	6.44e-12	61.45	5.28e-18
chr1-997	chr1	31932187	31932335	18.4	6.44e-12	114.12	3.44e-21
chr1-998	chr1	34177111	34177259	6.13	1.09e-06	27.55	6.31e-14
chr1-999	chr1	35931196	35931344	8.43	1.42e-07	23.62	3.51e-12
chr10-1	chr10	67100329	67100477	331.19	1.51e-227	25.49	5.89e-109
chr10-10	chr10	117953292	117953440	31.69	5.49e-69	22.31	6.87e-60
chr10-100	chr10	84911115	84911263	107.33	6.48e-58	16.76	1.98e-30
chr10-1000	chr10	125956705	125956853	12.27	4.23e-07	19.02	1.6e-08
chr10-1004	chr10	127265147	127265295	27.6	8.29e-11	6.81	1.04e-05
chr10-1005	chr10	128094530	128094678	27.6	8.29e-11	6.37	1.74e-05
[truncated: 26,571 more rows]

## Sheet: Nanog_ChIP_ESC
#PeakID	chr	start	end	Fold Change vs Control	p-value vs Control	Fold Change vs Local	p-value vs Local
chr1-1	chr1	134535170	134535346	635.67	0	108.87	0
chr1-2	chr1	119049078	119049254	98.68	0	93.97	0
chr1-3	chr1	36985955	36986131	152.06	0	38.47	0
chr1-4	chr1	132471137	132471313	297.67	0	83.39	0
chr1-5	chr1	180924770	180924946	65.74	0	64.3	0
chr1-6	chr1	13084993	13085169	496.92	0	44.42	0
chr11-1	chr11	62215206	62215382	99.22	0	128.73	0
chr11-2	chr11	77947983	77948159	41.95	0	135.45	0
chr11-3	chr11	57970672	57970848	85.24	0	106.59	0
chr11-4	chr11	33537474	33537650	127.86	0	60.81	0
chr12-1	chr12	56298564	56298740	308.96	0	61.26	0
chr12-2	chr12	99299956	99300132	142.78	0	80.65	0
chr12-3	chr12	87318043	87318219	289.6	0	93.2	0
chr13-1	chr13	94706685	94706861	308.15	0	84.61	0
chr14-1	chr14	57732836	57733012	277.5	0	61.74	0
chr16-1	chr16	48422494	48422670	295.25	0	88.44	0
chr17-1	chr17	84351424	84351600	663.1	0	40.11	0
chr18-1	chr18	33836029	33836205	321.06	0	70.3	0
chr19-1	chr19	29008164	29008340	254.11	0	62.35	0
chr2-1	chr2	44525439	44525615	158.51	0	50.2	0
chr2-2	chr2	109943279	109943455	534.03	0	39.56	0
chr3-1	chr3	30724542	30724718	51.22	0	66.05	0
chr3-2	chr3	122145488	122145664	157.71	0	148.47	0
chr3-3	chr3	88572041	88572217	250.07	0	31.93	0
chr4-1	chr4	136146841	136147017	152.87	0	81.37	0
chr4-2	chr4	127227390	127227566	48.94	0	62.9	0
chr4-3	chr4	55464342	55464518	546.93	0	46.84	0
chr4-4	chr4	82430882	82431058	274.27	0	94.89	0
chr4-5	chr4	10932368	10932544	91.16	0	70.87	0
chr4-6	chr4	99636103	99636279	50.66	0	55.29	0
chr5-1	chr5	33535639	33535815	59.53	0	57.69	0
chr5-2	chr5	72902396	72902572	95.46	0	120.83	0
chr5-3	chr5	123158106	123158282	277.5	0	87.28	0
chr6-1	chr6	72787443	72787619	93.31	0	87.64	0
chr7-1	chr7	140959557	140959733	93.58	0	39.97	0
chr8-1	chr8	47726962	47727138	131.09	0	81.35	0
chr8-2	chr8	72334341	72334517	264.59	0	57.39	0
chr9-1	chr9	58279464	58279640	84.16	0	39.35	0
chr15-1	chr15	97593757	97593933	123.83	0	42.31	0
chr2-3	chr2	65421403	65421579	120.2	0	59.62	0
chr2-4	chr2	93927836	93928012	480.78	0	95.6	0
chr5-4	chr5	13982542	13982718	240.39	0	39.32	0
chr5-5	chr5	92112639	92112815	240.39	0	54.18	0
chr18-2	chr18	47492980	47493156	47.92	4.6e-302	52.96	0
chr3-5	chr3	34745396	34745572	118.99	0	72.54	0
chr18-3	chr18	65941228	65941404	236.36	0	93.99	0
chrX-1	chrX	103311832	103312008	118.18	0	122.05	0
chr5-6	chr5	73219705	73219881	116.57	0	55.43	0
chr15-3	chr15	77355414	77355590	232.33	0	65.08	0
chr8-5	chr8	78068351	78068527	461.42	0	67.64	0
chr8-4	chr8	107287618	107287794	76.37	0	100.97	0
chr7-2	chr7	35351253	35351429	228.29	0	117.01	0
chr3-4	chr3	133524808	133524984	454.97	0	46.85	0
chr15-2	chr15	65749594	65749770	450.13	0	88.48	0
chr8-3	chr8	89003551	89003727	112.13	0	40.62	0
chr19-3	chr19	23095028	23095204	224.26	0	51.55	0
chr16-2	chr16	22800504	22800680	110.92	0	115.41	0
chr2-5	chr2	122370205	122370381	55.06	2.32e-291	53.1	0
chr8-6	chr8	48752022	48752198	219.42	0	49.62	0
chr15-4	chr15	100041549	100041725	43.88	7.88e-269	150.32	0
chr19-2	chr19	47018065	47018241	219.42	0	45.59	0
chr16-4	chr16	8778783	8778959	108.5	0	73.24	0
chr4-7	chr4	131126141	131126317	432.38	0	88	0
chr6-2	chr6	37689836	37690012	430.77	0	79.27	0
chr2-6	chr2	50265393	50265569	429.16	0	78.56	0
chr3-6	chr3	157321172	157321348	213.77	0	47.72	0
chr5-8	chr5	103724637	103724813	425.93	0	43.21	3.95e-322
chr9-2	chr9	54857596	54857772	212.97	0	71.88	0
chr19-4	chr19	28182915	28183091	212.97	0	108.35	0
chr9-5	chr9	31018796	31018972	70.72	1.51e-303	100.55	0
chr4-9	chr4	45654379	45654555	105.27	0	93.99	0
chr5-9	chr5	74953037	74953213	70.18	7.49e-300	101.17	0
chr6-4	chr6	149131210	149131386	104.87	0	87.43	0
chr14-3	chr14	78289074	78289250	419.48	0	65.67	0
chr5-7	chr5	23401533	23401709	208.12	0	69.24	0
chr11-7	chr11	88968553	88968729	18.85	5.63e-181	94.38	0
chr3-8	chr3	34646315	34646491	205.7	0	51.57	0
chr12-4	chr12	86501767	86501943	51.43	1.82e-265	19.47	4.8e-226
chr16-3	chr16	84769216	84769392	205.7	0	50.12	0
chr14-2	chr14	75505253	75505429	409.8	0	133.75	0
chr11-5	chr11	55323857	55324033	204.09	0	67.89	0
chr13-2	chr13	34244317	34244493	204.09	0	56.04	0
chr17-2	chr17	35503987	35504163	50.82	4.75e-262	21.88	1.54e-235
chr1-7	chr1	59472692	59472868	404.96	0	71.48	0
chr15-5	chr15	10723674	10723850	100.84	2.77e-318	57.66	0
chr2-7	chr2	84762377	84762553	401.73	0	129.89	0
chr3-7	chr3	53650266	53650442	100.43	2.79e-316	59.91	0
chr11-6	chr11	68400848	68401024	400.12	0	91.67	0
chr16-5	chr16	95767307	95767483	398.5	0	75.34	0
chr3-10	chr3	34757962	34758138	197.64	0	18.33	3.5e-211
chr4-11	chr4	57841997	57842173	98.82	2.74e-310	58.44	0
chr4-8	chr4	119026496	119026672	65.88	4.97e-276	57.46	0
chr7-3	chr7	130264664	130264840	393.66	0	71.68	0
chr19-5	chr19	42409973	42410149	98.42	2.7e-308	81.55	0
chr9-9	chr9	22732717	22732893	196.02	0	191.04	0
chr4-10	chr4	57690945	57691121	48.8	1.82e-248	66.87	0
chr9-4	chr9	110323081	110323257	194.41	0	134.52	0
chr3-9	chr3	97811341	97811517	96.8	2.51e-302	103.85	0
chr1-8	chr1	131890373	131890549	385.6	0	48.87	2.63e-304
chr3-11	chr3	32763080	32763256	96	2.32e-298	42.99	4.29e-290
chr13-3	chr13	112462511	112462687	64	3.69e-265	65.12	0
chr18-4	chr18	75579475	75579651	48	9.97e-242	63.26	0
chr9-3	chr9	102205625	102205801	191.18	0	171.8	0
chr7-6	chr7	73602927	73603103	63.46	2.35e-263	114.55	0
chr16-6	chr16	78265273	78265449	38.08	4.55e-222	90.23	0
chr15-6	chr15	30383227	30383403	377.53	0	145.13	0
chr2-9	chr2	29835606	29835782	46.79	5.02e-235	78.48	0
chr6-3	chr6	82613268	82613444	374.3	0	71.15	0
chr14-4	chr14	63501935	63502111	46.79	5.02e-235	33.99	8.96e-260
chr19-6	chr19	30029095	30029271	374.3	0	74.42	0
chr8-8	chr8	106872571	106872747	62.11	3.66e-256	55.58	7.45e-307
chr11-10	chr11	71502241	71502417	186.34	0	117.22	0
chr15-7	chr15	93521233	93521409	46.59	2.35e-233	38.15	6.35e-270
chr7-4	chr7	139949844	139950020	92.77	1.63e-286	33.43	5.93e-256
chr13-5	chr13	44728577	44728753	46.18	5.05e-230	90.02	0
chr9-6	chr9	118389962	118390138	26.27	3.52e-185	81.06	0
chr14-6	chr14	122468008	122468184	367.85	0	46.79	3.48e-286
chr2-8	chr2	10334437	10334613	183.12	0	49.69	9.57e-291
chr7-5	chr7	112691311	112691487	60.77	5.24e-249	20.89	4.08e-207
chr8-12	chr8	86393904	86394080	182.31	0	82.45	0
chr19-7	chr19	24491977	24492153	60.77	5.24e-249	54.14	9.82e-298
chr14-5	chr14	49447796	49447972	90.35	1.04e-276	76.24	0
chr18-5	chr18	35138161	35138337	361.4	0	82.8	0
chr4-12	chr4	66330752	66330928	44.97	9.85e-222	123.24	0
chr11-9	chr11	11098378	11098554	359.78	0	95.75	0
chr14-7	chr14	92826720	92826896	179.89	0	120.85	0
chr4-13	chr4	102976453	102976629	356.56	0	66.32	2.41e-310
chr8-7	chr8	85441690	85441866	59.43	6.87e-242	61.68	1.73e-303
chr13-4	chr13	44751793	44751969	356.56	0	34.75	1.29e-249
chr1-9	chr1	118625560	118625736	353.33	0	57.93	6.66e-295
chr7-9	chr7	80746508	80746684	175.86	3.29e-319	35.17	2.32e-247
chr2-12	chr2	170772306	170772482	175.05	3.29e-319	47.69	3.12e-274
chr9-7	chr9	46581988	46582164	175.05	3.29e-319	89.06	0
chr7-7	chr7	28963517	28963693	43.56	1.67e-213	79.85	1.53e-320
chr12-6	chr12	105087456	105087632	87.12	5.1e-265	65.17	9.37e-302
chr17-3	chr17	35505028	35505204	58.08	8.24e-235	19.02	1.09e-189
chr2-10	chr2	174261425	174261601	57.81	4.78e-233	57.98	1.28e-289
chr3-12	chr3	135546515	135546691	43.36	7.28e-212	32	1.95e-235
chr3-13	chr3	136115862	136116038	346.87	0	86.34	0
chr7-8	chr7	129430006	129430182	173.44	1.00e-314	112.16	0
chr15-8	chr15	96179443	96179619	173.44	1.00e-314	78.44	2.00e-317
chr9-10	chr9	75085480	75085656	345.26	0	97.91	0
chr2-11	chr2	31091346	31091522	171.82	2.98e-310	57.44	4.28e-286
chr5-10	chr5	101538013	101538189	342.03	0	72.6	5.37e-306
chr5-11	chr5	119374940	119375116	171.02	2.98e-310	71.29	2.43e-304
chr6-5	chr6	82175090	82175266	342.03	0	73.05	1.48e-306
chr2-13	chr2	73276285	73276461	170.21	5.1e-308	75.02	1.59e-307
chr5-12	chr5	142799377	142799553	42.55	5.79e-207	58.89	1.12e-285
chr9-11	chr9	55225235	55225411	170.21	5.1e-308	57.45	1.88e-283
chr9-8	chr9	114584578	114584754	85.11	2.82e-257	54.53	9.52e-279
chr11-8	chr11	80889445	80889621	85.11	2.82e-257	60.09	1.7e-287
chr2-16	chr2	119486534	119486710	84.7	2.4e-255	198.67	0
chr12-5	chr12	80116820	80116996	56.47	5.11e-226	40.99	5.95e-252
chr2-15	chr2	146834472	146834648	56.2	2.88e-224	49.22	5.11e-267
chr3-14	chr3	52254218	52254394	168.6	1.46e-303	86.41	2.61e-317
chr4-16	chr4	141565511	141565687	84.3	2.03e-253	53.27	4.77e-274
chr7-10	chr7	73535199	73535375	84.3	2.03e-253	67.83	1.3e-295
chr13-6	chr13	18575796	18575972	168.6	1.46e-303	93.33	4.94e-324
chr14-8	chr14	25604896	25605072	84.3	2.03e-253	69.44	1.02e-297
chr17-4	chr17	76111871	76112047	168.6	1.46e-303	68.62	1.17e-296
chr13-10	chr13	20124089	20124265	83.9	1.7e-251	109.53	0
chr19-10	chr19	7261643	7261819	167.79	2.46e-301	60.47	5.35e-284
chr19-8	chr19	31106153	31106329	55.93	1.61e-222	84.75	4.63e-314
chr12-7	chr12	54102619	54102795	83.49	1.42e-249	76.02	6.58e-303
chr13-7	chr13	51125471	51125647	55.12	4.96e-219	35.87	1.92e-234
chr2-14	chr2	153168197	153168373	329.13	0	38.34	4.77e-239
chr15-10	chr15	62012707	62012883	81.88	7.99e-244	28.83	1.62e-213
chr4-15	chr4	129750567	129750743	81.48	6.51e-242	61.61	1.75e-277
chr9-13	chr9	21768555	21768731	81.07	6.51e-242	60.32	2.69e-274
chr12-12	chr12	51521737	51521913	162.14	3.01e-290	111.08	0
chr15-11	chr15	99872658	99872834	324.29	0	35.5	4.88e-229
chr8-9	chr8	57732919	57733095	32.27	3.13e-177	72.96	3.18e-289
chr9-12	chr9	106211365	106211541	53.78	4.38e-212	82.69	5.88e-300
chr11-13	chr11	95980875	95981051	322.67	0	54.19	8.45e-264
chr16-7	chr16	64885283	64885459	161.34	4.88e-288	44.3	1.19e-246
chr17-9	chr17	84355134	84355310	322.67	0	14.19	7.1e-152
chr14-9	chr14	48662959	48663135	80.27	4.25e-238	93.34	0
chr15-9	chr15	53166544	53166720	321.06	0	59.08	7.9e-270
chr19-9	chr19	4810393	4810569	321.06	0	56.67	2.74e-266
chr2-21	chr2	33580737	33580913	79.86	3.4e-236	56.39	1.55e-264
chr5-13	chr5	123134974	123135150	159.72	1.26e-283	24.34	2.66e-194
chr2-17	chr2	135614807	135614983	158.92	2e-281	83.3	4.13e-296
chr8-10	chr8	44971552	44971728	317.83	0	53.38	1.32e-258
chr8-11	chr8	44979424	44979600	79.46	2.7e-234	62.13	2.32e-271
chr11-21	chr11	3145489	3145665	9.35	6.44e-94	11.85	2.04e-135
chr19-12	chr19	37881584	37881760	317.83	0	24.49	7.98e-194
chr4-17	chr4	132155338	132155514	52.7	6.65e-207	99.46	0
chr18-6	chr18	65122622	65122798	52.7	6.65e-207	135.07	0
chr4-14	chr4	123624596	123624772	78.65	2.13e-232	32.59	3.24e-215
chr14-11	chr14	21486289	21486465	314.61	0	38.87	9.85e-230
chr11-11	chr11	87416190	87416366	156.5	4.96e-277	108.29	1.69e-313
chr19-11	chr19	55491768	55491944	312.99	9.88e-324	72.19	1.01e-279
chr7-11	chr7	43344117	43344293	311.38	2.77e-321	58.87	1.88e-261
chr8-13	chr8	78625223	78625399	155.69	7.73e-275	68.18	1.43e-273
chr9-15	chr9	53806508	53806684	311.38	2.77e-321	68.18	1.43e-273
chr17-7	chr17	37079042	37079218	311.38	2.77e-321	41.76	3.04e-233
chr3-15	chr3	65657432	65657608	77.44	1.01e-226	45.03	3.38e-238
chr4-20	chr4	48271961	48272137	77.44	1.01e-226	72.41	4.11e-277
chr12-9	chr12	55505439	55505615	51.63	4.92e-200	49.16	2.32e-245
chr13-9	chr13	97282872	97283048	77.44	1.01e-226	41.38	2.62e-231
chr13-12	chr13	99090504	99090680	154.88	1.2e-272	117.77	3.17e-317
chr14-10	chr14	60957957	60958133	309.77	8.60e-319	32.77	2.14e-212
chr2-22	chr2	121270579	121270755	308.15	8.60e-319	64.61	2.3e-266
chr3-16	chr3	79218593	79218769	153.27	1.85e-270	75.22	2.44e-277
chr6-6	chr6	140603303	140603479	51.09	2.53e-198	36.57	5.47e-219
chr9-14	chr9	59473270	59473446	306.54	2.65e-316	89.88	7.43e-292
chr13-8	chr13	70124971	70125147	306.54	2.65e-316	84.17	1.67e-286
chr18-9	chr18	36415670	36415846	306.54	2.65e-316	47.56	3.79e-240
chr18-7	chr18	54828082	54828258	51.09	2.53e-198	63.13	4.32e-263
chr2-20	chr2	8498559	8498735	76.23	5.97e-223	64.72	9.87e-264
chr3-17	chr3	84181902	84182078	50.82	1.29e-196	73.26	9.3e-274
chr5-18	chr5	8424302	8424478	50.82	1.29e-196	97.68	4.3e-297
chr11-12	chr11	95311558	95311734	50.82	1.29e-196	28.13	5.52e-197
chr2-23	chr2	181332640	181332816	151.66	4.29e-266	97.16	4.2e-295
chr4-21	chr4	55477495	55477671	151.66	4.29e-266	21.55	4.6e-175
chr8-14	chr8	34732841	34733017	303.31	2.46e-311	47.06	8.53e-237
chr12-10	chr12	100831856	100832032	151.66	4.29e-266	64.78	2.04e-262
chr13-11	chr13	35853259	35853435	75.83	4.54e-221	53.54	4.01e-247
chr3-19	chr3	68565243	68565419	75.43	3.43e-219	24.11	7.4e-183
chr4-18	chr4	138794462	138794638	50.28	3.29e-193	63.65	1.27e-259
chr17-5	chr17	27240951	27241127	75.43	3.43e-219	48.1	2.72e-237
chr18-8	chr18	10461217	10461393	37.71	6.71e-175	50.43	4.8e-241
chr19-15	chr19	25479234	25479410	75.43	3.43e-219	92.37	1.77e-289
chr1-10	chr1	100878181	100878357	75.02	3.43e-219	66.98	2.61e-262
chr2-18	chr2	109311493	109311669	300.09	0	67.86	2.42e-263
chr2-19	chr2	109942221	109942397	37.51	6.71e-175	17.02	3.68e-155
chr5-16	chr5	54763077	54763253	150.04	6.48e-264	107.03	1.01e-299
chr5-14	chr5	93126635	93126811	300.09	0	60.01	1.42e-253
chr16-8	chr16	32291939	32292115	150.04	6.48e-264	188.77	0
chr7-12	chr7	35335273	35335449	149.24	9.72e-262	60.04	2.97e-252
chr10-1	chr10	67100462	67100638	298.47	2.23e-306	17.74	1.73e-157
chr1-11	chr1	119076072	119076248	74.22	1.91e-215	40.76	1.42e-220
chr4-22	chr4	6968891	6969067	148.43	1.45e-259	63.01	1.06e-254
chr5-15	chr5	56122243	56122419	296.86	6.65e-304	183.4	0
chr14-13	chr14	99510252	99510428	74.22	1.91e-215	65.42	1.19e-257
chr14-17	chr14	122434086	122434262	74.22	1.91e-215	84.88	3.48e-278
chrX-2	chrX	101396492	101396668	74.22	1.91e-215	63.01	1.06e-254
chr4-19	chr4	33823972	33824148	49.21	4.03e-188	127.68	0
chr4-23	chr4	57920620	57920796	147.62	2.14e-257	34.05	1.77e-205
chr5-21	chr5	20974033	20974209	73.81	1.42e-213	130.96	8.07e-311
chr7-13	chr7	29944306	29944482	49.21	4.03e-188	54.62	3.61e-242
chr11-14	chr11	57719708	57719884	49.21	4.03e-188	105.31	1.22e-293
chr11-16	chr11	67020656	67020832	73.81	1.42e-213	24.85	2.57e-181
chr4-24	chr4	72146149	72146325	293.63	5.79e-299	99.6	1.1e-287
chr6-9	chr6	55792174	55792350	48.94	1.98e-186	33.86	6.04e-204
chr8-15	chr8	90851663	90851839	293.63	5.79e-299	59.06	6.33e-247
chr9-16	chr9	7634049	7634225	146.82	3.15e-255	64.3	1.58e-253
chr11-15	chr11	101696303	101696479	73.41	1.04e-211	68.18	4.3e-258
chr19-13	chr19	16491727	16491903	36.7	1.28e-168	82.59	4.75e-273
chr1-12	chr1	39528483	39528659	146.01	3.15e-255	77.12	3.06e-266
chr5-19	chr5	76321736	76321912	290.41	1.69e-296	44.07	8.74e-222
chr5-17	chr5	122453225	122453401	72.6	7.6e-210	58.41	2.2e-243
chr6-7	chr6	94750650	94750826	36.3	4.65e-167	61.26	4.79e-247
chr6-10	chr6	100378147	100378323	145.2	4.6e-253	31.2	1.59e-195
chr11-18	chr11	79425818	79425994	72.6	7.6e-210	69.29	1.59e-256
chr5-20	chr5	138991887	138992063	36.1	1.69e-165	63.24	4.14e-248
chr12-8	chr12	51858236	51858412	144.4	6.67e-251	96.07	3.34e-280
chr14-16	chr14	121506330	121506506	288.79	4.9e-294	68.43	3.71e-254
chr17-6	chr17	63533223	63533399	144.4	6.67e-251	44.6	1.74e-221
chr19-14	chr19	41441493	41441669	144.4	6.67e-251	81.9	6.22e-268
chr6-8	chr6	83421849	83422025	143.59	9.61e-249	81.44	5.1e-266
chr13-13	chr13	57362685	57362861	71.8	3.97e-206	81.44	5.1e-266
chr13-14	chr13	73099545	73099721	71.8	3.97e-206	73.6	2.72e-258
chr14-14	chr14	121207911	121208087	71.8	3.97e-206	110.4	2.74e-289
chr18-10	chr18	24402319	24402495	71.8	3.97e-206	132.48	2.88e-303
chr3-21	chr3	34756813	34756989	142.78	1.37e-246	12.23	4.35e-124
chr14-12	chr14	61005403	61005579	47.59	1.06e-179	62.53	1.65e-244
chrX-3	chrX	21344491	21344667	142.78	1.37e-246	52	1.4e-230
chr2-24	chr2	30760185	30760361	141.98	1.95e-244	50.9	1.09e-227
chr5-23	chr5	110437771	110437947	47.33	5.04e-178	73.31	4.03e-255
chr11-17	chr11	20231118	20231294	283.95	1.15e-286	37.64	3.81e-205
chr17-8	chr17	33600019	33600195	283.95	1.15e-286	81.87	1.9e-263
chr3-20	chr3	65477261	65477437	141.17	1.95e-244	94.84	5.16e-273
chr9-17	chr9	31976296	31976472	282.34	1.15e-286	105.03	1.07e-280
chr16-10	chr16	88720168	88720344	47.06	5.04e-178	67.37	2.4e-247
chr4-26	chr4	21723118	21723294	46.79	2.37e-176	105.57	1.74e-279
chr11-19	chr11	9117020	9117196	70.18	1.42e-200	45.38	1.23e-216
chr14-15	chr14	40864952	40865128	140.36	2.75e-242	48.56	1.22e-221
chr17-10	chr17	5052271	5052447	140.36	2.75e-242	72.48	2.15e-251
chr3-18	chr3	72858844	72859020	69.78	9.95e-199	82.53	1.35e-259
chr5-24	chr5	38698158	38698334	69.78	9.95e-199	64.81	1.12e-241
chr6-12	chr6	86950966	86951142	279.11	9.05e-282	87	1.67e-263
chr12-11	chr12	44492903	44493079	139.56	3.85e-240	74.86	2.37e-252
chr2-25	chr2	35845903	35846079	46.25	5.12e-173	61.54	1.72e-236
chr15-12	chr15	9134962	9135138	69.37	6.92e-197	105.5	3e-276
chr2-27	chr2	149939712	149939888	68.97	4.77e-195	92.67	4.04e-265
chr5-22	chr5	108077073	108077249	68.97	4.77e-195	51.59	2.9e-222
chr6-14	chr6	65933257	65933433	275.89	6.94e-277	128.99	1.88e-289
chr13-15	chr13	31728962	31729138	275.89	6.94e-277	67.69	4.3e-242
chrX-4	chrX	103472401	103472577	275.89	6.94e-277	58.56	1.7e-231
chr5-25	chr5	75085272	75085448	68.57	4.77e-195	56.48	1.55e-227
chr6-15	chr6	92495605	92495781	27.43	8e-142	48.66	9.66e-217
chr15-15	chr15	7081939	7082115	27.43	8e-142	58.94	1.27e-230
chr15-18	chr15	55268150	55268326	34.28	1.14e-154	45.4	9.9e-212
chr15-14	chr15	60839883	60840059	274.27	6.94e-277	59.68	1.57e-231
chr1-13	chr1	119634922	119635098	272.66	1.9e-274	157.22	1.61e-300
chr1-19	chr1	136727997	136728173	136.33	1.01e-233	67.87	1.82e-239
chr2-28	chr2	60050700	60050876	136.33	1.01e-233	67.38	5.99e-239
chr4-25	chr4	57770267	57770443	68.16	3.27e-193	40.49	2.79e-202
chr7-16	chr7	13014339	13014515	136.33	1.01e-233	35.73	2.37e-193
chr16-9	chr16	26962023	26962199	272.66	1.9e-274	58.23	2.09e-228
chr2-35	chr2	134960640	134960816	135.52	1.38e-231	80.15	4.89e-250
chr3-22	chr3	103207901	103208077	33.88	1.33e-151	37.21	4.22e-195
chr8-19	chr8	111613318	111613494	45.17	4.88e-168	94.72	4.37e-262
chr9-20	chr9	49796586	49796762	27.1	5.97e-139	96.67	1.47e-263
chr14-18	chr14	7907217	7907393	135.52	1.38e-231	121.79	2.98e-280
chr14-20	chr14	48754167	48754343	67.76	2.22e-191	36.63	5.54e-194
chr15-13	chr15	53343600	53343776	271.05	5.18e-272	53.28	1.06e-220
chr18-11	chr18	35455080	35455256	135.52	1.38e-231	173.66	5.77e-306
chr6-11	chr6	31240125	31240301	134.72	1.86e-229	110.97	6.55e-272
chr6-16	chr6	112950406	112950582	269.43	1.4e-269	41.8	3.58e-202
chr9-22	chr9	78375054	78375230	67.36	1.5e-189	28.95	2.71e-176
chr9-24	chr9	117297679	117297855	134.72	1.86e-229	81.06	2.28e-249
chr11-20	chr11	117082381	117082557	26.94	1.61e-137	62.14	2.28e-230
chr17-11	chr17	70828700	70828876	44.91	2.2e-166	30.17	3.51e-179
chr19-16	chr19	30505580	30505756	269.43	1.4e-269	84.74	1.49e-252
chr2-32	chr2	71866714	71866890	22.32	5.44e-126	46.1	7.19e-208
chr4-27	chr4	55475456	55475632	267.82	3.75e-267	18.49	2.4e-144
chr5-26	chr5	76285810	76285986	133.91	2.49e-227	142.55	3.32e-288
chr6-20	chr6	88483172	88483348	133.91	2.49e-227	89.96	2.6e-255
chr8-20	chr8	14340198	14340374	44.64	9.81e-165	70.73	3.43e-238
chr8-23	chr8	27236311	27236487	66.95	1.01e-187	27.5	1.15e-171
chr9-21	chr9	55598610	55598786	133.91	2.49e-227	104.11	9.8e-266
chr17-12	chr17	47914801	47914977	133.91	2.49e-227	81.28	4.42e-248
chrX-5	chrX	60772526	60772702	133.91	2.49e-227	94.55	7.35e-259
chr1-14	chr1	20974900	20975076	266.21	3.75e-267	68.22	3.23e-234
chr4-29	chr4	65830576	65830752	266.21	3.75e-267	84.5	2.4e-249
chr6-13	chr6	125433704	125433880	266.21	3.75e-267	44.71	1.75e-204
chr10-2	chr10	84708360	84708536	266.21	3.75e-267	26.62	2.09e-168
chr11-25	chr11	119395447	119395623	26.62	4.32e-136	68.22	3.23e-234
chr2-26	chr2	129587797	129587973	132.3	3.31e-225	59.83	1.31e-223
chr2-30	chr2	129798472	129798648	132.3	3.31e-225	55.48	2.53e-218
chr7-14	chr7	95480217	95480393	264.59	9.96e-265	105.22	2.63e-263
chr8-16	chr8	72316177	72316353	33.07	5.01e-147	34.16	1.42e-184
chr9-19	chr9	42100721	42100897	132.3	3.31e-225	38.3	1.66e-192
chr13-16	chr13	18841992	18842168	66.15	6.69e-186	95.36	2.3e-256
chr16-12	chr16	33844289	33844465	132.3	3.31e-225	41.8	1.42e-198
chr1-18	chr1	57470436	57470612	21.91	2.66e-123	73.37	1.75e-236
chr1-22	chr1	119347878	119348054	65.74	4.42e-184	79.81	2.33e-242
chr2-29	chr2	109579025	109579201	262.98	2.63e-262	65.93	5.09e-229
chr14-19	chr14	59737085	59737261	262.98	2.63e-262	62.75	1.43e-225
chr2-31	chr2	132133548	132133724	261.37	6.89e-260	81.46	2.61e-242
chr5-29	chr5	50122808	50122984	130.68	5.73e-221	41.67	5.77e-196
chr8-24	chr8	57403910	57404086	261.37	6.89e-260	101.6	1.11e-257
chr8-22	chr8	83036936	83037112	130.68	5.73e-221	90.43	1.44e-249
chr8-17	chr8	85472995	85473171	43.56	8.36e-160	30.34	2.83e-174
chr8-18	chr8	111789728	111789904	43.56	8.36e-160	31.4	1.34e-176
chr11-22	chr11	54953996	54954172	26.14	7.96e-132	53.51	3.49e-213
chr15-16	chr15	101181194	101181370	32.67	5.41e-144	100.47	6.67e-257
chr4-30	chr4	125534614	125534790	16.23	2.27e-105	44.49	3.08e-199
chr6-18	chr6	144361397	144361573	259.75	1.79e-257	53.18	1.87e-211
chr7-18	chr7	73400337	73400513	129.88	7.45e-219	44.49	3.08e-199
chr7-15	chr7	115866219	115866395	259.75	1.79e-257	39.59	2.84e-191
chr12-13	chr12	71296928	71297104	64.94	1.88e-180	30.46	1.78e-173
chr15-17	chr15	28071110	28071286	129.88	7.45e-219	85.59	3.08e-244
chr5-27	chr5	32437902	32438078	258.14	1.79e-257	68.17	3.92e-227
chr6-17	chr6	148992400	148992576	43.02	3.62e-158	41.93	5.45e-194
chr10-4	chr10	85451630	85451806	32.27	1.76e-142	30.8	3.84e-173
chr16-13	chr16	46500837	46501013	129.07	7.45e-219	97.08	2.17e-251
chr17-13	chr17	27994419	27994595	258.14	1.79e-257	65.19	4.55e-224
chr19-17	chr19	28560795	28560971	64.53	1.88e-180	68.7	1.17e-227
chr1-16	chr1	72960385	72960561	256.53	4.62e-255	56.53	5.34e-213
chr1-17	chr1	156983647	156983823	42.75	1.56e-156	55.82	3.86e-212
chr5-32	chr5	112001844	112002020	64.13	1.21e-178	109.57	4.13e-258
chr5-31	chr5	131526894	131527070	256.53	4.62e-255	76.51	1.4e-233
chr11-26	chr11	7423591	7423767	18.32	3.72e-111	71.57	4.88e-229
chr11-23	chr11	8723333	8723509	256.53	4.62e-255	32.87	1.96e-176
chr14-21	chr14	27347340	27347516	42.75	1.56e-156	40.71	8.37e-191
chr18-15	chr18	67258660	67258836	128.26	9.61e-217	39.98	1.4e-189
chrX-6	chrX	99556951	99557127	128.26	9.61e-217	86.17	1.09e-241
chr1-20	chr1	6059181	6059357	63.73	7.76e-177	119.18	3.22e-262
chr7-22	chr7	48918116	48918292	127.46	1.23e-214	65.82	6.14e-222
chr11-24	chr11	62494798	62494974	63.73	7.76e-177	55.82	8.09e-211
chr13-19	chr13	97097290	97097466	127.46	1.23e-214	89.08	1.93e-242
chr17-16	chr17	63813666	63813842	254.91	1.18e-252	96.92	3.69e-248
chr5-33	chr5	104434034	104434210	126.65	1.56e-212	62.6	3.52e-217
chr6-23	chr6	103810561	103810737	63.32	4.93e-175	77.55	1.4e-231
chr9-23	chr9	88332583	88332759	63.32	4.93e-175	55.46	4.51e-209
chr11-29	chr11	20138566	20138742	21.11	1.22e-116	39.83	5.58e-187
chr13-18	chr13	21786587	21786763	253.3	3.01e-250	34.37	3.49e-177
chr13-17	chr13	44705551	44705727	253.3	3.01e-250	25.4	2.87e-157
chr15-19	chr15	25773716	25773892	42.22	2.82e-153	23.31	1.22e-151
chr1-21	chr1	13074596	13074772	125.84	1.97e-210	29.42	7.29e-166
chr2-33	chr2	165810035	165810211	41.95	1.18e-151	46.82	1.72e-196
chr4-31	chr4	69892903	69893079	62.92	3.11e-173	150.13	1.89e-274
chr6-22	chr6	85633306	85633482	251.69	7.57e-248	131.93	9.29e-266
chr6-19	chr6	134804979	134805155	125.84	1.97e-210	47.84	6.22e-198
chr7-21	chr7	134771419	134771595	125.84	1.97e-210	64.98	2.64e-218
chr1-15	chr1	51536136	51536312	250.07	7.57e-248	44.37	1.04e-191
chr1-24	chr1	62783631	62783807	41.68	1.18e-151	58.86	2.33e-210
chr2-34	chr2	70278858	70279034	125.04	1.97e-210	36.51	6.66e-179
chr2-39	chr2	77059688	77059864	41.68	1.18e-151	98.32	1.92e-244
chr7-20	chr7	30266026	30266202	62.52	3.11e-173	106.81	5.74e-250
chr12-14	chr12	41386801	41386977	31.26	1.82e-136	97.21	1.09e-243
chr13-20	chr13	109777146	109777322	31.26	1.82e-136	26.06	6.02e-157
chr15-25	chr15	36991530	36991706	125.04	1.97e-210	82.4	1.1e-232
chr15-23	chr15	53176960	53177136	125.04	1.97e-210	73.95	1.71e-225
chr16-15	chr16	9083754	9083930	125.04	1.97e-210	88.28	2.83e-237
chrX-7	chrX	7764976	7765152	125.04	1.97e-210	80.86	1.98e-231
chr14-22	chr14	70352030	70352206	248.46	1.89e-245	79.59	6.59e-229
chr17-20	chr17	37990644	37990820	124.23	2.46e-208	107.45	9.21e-249
chr2-36	chr2	155569350	155569526	246.85	4.7e-243	76.25	1.28e-224
chr3-23	chr3	127544723	127544899	246.85	4.7e-243	72.37	3.36e-221
chr3-24	chr3	137780127	137780303	41.14	2.04e-148	43.13	2e-187
chr5-28	chr5	115317563	115317739	41.14	2.04e-148	58.49	2.87e-207
chr7-19	chr7	4536447	4536623	61.71	1.2e-169	39.91	2.19e-182
chr7-17	chr7	72854687	72854863	123.42	3.05e-206	104.15	4.17e-245
chr8-21	chr8	23562165	23562341	41.14	2.04e-148	36.97	1.94e-177
chr18-13	chr18	69782245	69782421	61.71	1.2e-169	57.32	6.12e-206
chr19-18	chr19	42136123	42136299	24.68	5.44e-122	44.02	9.44e-189
chr4-32	chr4	57275349	57275525	122.62	3.76e-204	55.45	1.83e-202
chr4-28	chr4	65252305	65252481	61.31	7.41e-168	96.41	1.79e-238
chr6-25	chr6	30272479	30272655	61.31	7.41e-168	51.73	5.77e-198
chr8-27	chr8	111868811	111868987	122.62	3.76e-204	81.58	1.44e-227
chr10-3	chr10	56374161	56374337	40.87	8.36e-147	19.92	5.63e-137
chr15-22	chr15	92543400	92543576	122.62	3.76e-204	80.04	2.51e-226
chr17-15	chr17	43711961	43712137	122.62	3.76e-204	53.7	2.22e-200
chr18-20	chr18	46914503	46914679	245.23	1.16e-240	97.52	3.21e-239
chr1-25	chr1	52953583	52953759	60.9	4.52e-166	46.31	1.46e-189
chr6-21	chr6	133987210	133987386	121.81	4.58e-202	56.95	7.36e-203
chr8-26	chr8	92043072	92043248	60.9	4.52e-166	105.36	1.12e-242
chr8-25	chr8	114686622	114686798	60.9	4.52e-166	39.57	1.74e-179
chr9-25	chr9	32095659	32095835	40.6	3.4e-145	41.73	7.04e-183
chr11-35	chr11	102603560	102603736	121.81	4.58e-202	76.62	5.02e-222
chr13-21	chr13	53234861	53235037	121.81	4.58e-202	58.13	3.52e-204
chr17-19	chr17	29008027	29008203	60.9	4.52e-166	36.33	4.97e-174
chr17-30	chr17	72881922	72882098	121.81	4.58e-202	179.33	2.64e-277
chr19-19	chr19	44719415	44719591	121.81	4.58e-202	37.97	7.67e-177
chr4-36	chr4	45288045	45288221	40.33	3.4e-145	137.26	3.59e-258
chr7-23	chr7	16365304	16365480	24.2	3.27e-119	65.93	6.54e-211
chr9-26	chr9	118607680	118607856	242.01	2.82e-238	79.74	3.92e-223
chr11-30	chr11	69581926	69582102	121	4.58e-202	50.44	9.12e-194
chr11-31	chr11	117665264	117665440	40.33	3.4e-145	128.81	4.59e-254
chr17-18	chr17	10432872	10433048	121	4.58e-202	46.26	3.02e-188
chr17-25	chr17	66285376	66285552	242.01	2.82e-238	104.66	1.18e-240
chr4-34	chr4	153633399	153633575	240.39	6.82e-236	63.49	4.08e-207
chr5-34	chr5	97218810	97218986	60.1	2.73e-164	55.45	1.69e-198
chr5-30	chr5	124176909	124177085	120.2	5.55e-200	77.73	5.02e-220
chr8-28	chr8	78493154	78493330	120.2	5.55e-200	83.17	2.38e-224
chr17-22	chr17	70772644	70772820	60.1	2.73e-164	49.51	2.64e-191
chr4-33	chr4	54987261	54987437	238.78	1.64e-233	25.5	1.34e-148
chr7-24	chr7	70591714	70591890	39.8	5.49e-142	93.88	1.49e-230
chr14-23	chr14	27670083	27670259	39.8	5.49e-142	37.89	3e-173
chr17-32	chr17	9722786	9722962	238.78	1.64e-233	103.26	1.28e-236
chr18-18	chr18	80184750	80184926	119.39	6.65e-198	58.59	1.16e-200
chr1-26	chr1	86311076	86311252	59.29	9.76e-161	29.3	3.59e-156
chr1-27	chr1	114849748	114849924	118.58	7.92e-196	76.68	3.01e-216
chr6-27	chr6	108667660	108667836	29.65	4.47e-126	59.89	1.06e-200
chr9-27	chr9	102262068	102262244	118.58	7.92e-196	88.23	4.31e-225
chr15-20	chr15	60554709	60554885	237.17	3.9e-231	85.47	4.35e-223
chr2-38	chr2	52072175	52072351	117.78	9.35e-194	30.64	7.55e-158
chr3-25	chr3	88575567	88575743	23.56	1.07e-113	11.59	1.33e-99
chr6-26	chr6	51544292	51544468	58.89	5.76e-159	73.42	4.57e-212
chr6-24	chr6	83890402	83890578	117.78	9.35e-194	39.95	3.39e-174
chr7-26	chr7	37553864	37554040	29.44	1.32e-124	49.69	1e-187
chr14-24	chr14	27068055	27068231	235.55	9.2e-229	26.46	7.07e-149
chr15-24	chr15	7116816	7116992	117.78	9.35e-194	18.11	6.21e-126
chr15-21	chr15	39728836	39729012	117.78	9.35e-194	55.06	4.12e-194
chr16-11	chr16	25038759	25038935	235.55	9.2e-229	53.97	7.32e-193
chr17-29	chr17	45607199	45607375	235.55	9.2e-229	37.21	8.19e-170
chr18-14	chr18	35679000	35679176	235.55	9.2e-229	58.21	1.42e-197
chr19-20	chr19	23153836	23154012	58.89	5.76e-159	28.59	1.28e-153
chr2-40	chr2	180709135	180709311	116.97	1.09e-191	55.82	1.23e-193
chr3-26	chr3	137547563	137547739	58.48	3.37e-157	74.94	6.66e-212
chr5-35	chr5	59940971	59941147	116.97	1.09e-191	179.86	1.5e-266
chr12-15	chr12	12943242	12943418	58.48	3.37e-157	18.78	3.03e-127
chr18-17	chr18	84768933	84769109	38.99	3.34e-137	106.5	8.76e-234
chr4-35	chr4	41259164	41259340	232.33	2.15e-226	105.76	9.33e-232
chr4-38	chr4	71316723	71316899	58.08	3.37e-157	297.7	4.23e-296
chr5-43	chr5	72465085	72465261	232.33	2.15e-226	69.29	1.28e-205
chr8-29	chr8	45246431	45246607	38.72	3.34e-137	82.86	1.16e-216
chr9-29	chr9	45349257	45349433	58.08	3.37e-157	35.72	4.96e-165
chr9-28	chr9	78364878	78365054	58.08	3.37e-157	19.65	4.45e-129
chr11-28	chr11	17883285	17883461	232.33	2.15e-226	59.98	9.72e-197
chr13-22	chr13	65174171	65174347	232.33	2.15e-226	123.66	1.89e-241
chr15-26	chr15	7115774	7115950	38.72	3.34e-137	17.9	1.5e-123
chr17-21	chr17	48616362	48616538	38.72	3.34e-137	110.11	2.98e-234
chr17-23	chr17	87471758	87471934	38.72	3.34e-137	61.36	3.93e-198
chr1-23	chr1	152070567	152070743	115.36	1.27e-189	96.17	2.58e-224
chr5-47	chr5	16968960	16969136	115.36	1.27e-189	90.7	1.01e-220
chr11-27	chr11	6778719	6778895	115.36	1.27e-189	56.61	7.48e-192
chr12-17	chr12	55933458	55933634	115.36	1.27e-189	79.03	2.9e-212
chr17-31	chr17	30378343	30378519	115.36	1.27e-189	58.26	1.31e-193
chr1-30	chr1	140429378	140429554	114.55	1.46e-187	81.71	7.93e-213
chr2-42	chr2	146062664	146062840	57.27	1.12e-153	72.06	3.59e-205
chr5-37	chr5	148549418	148549594	114.55	1.46e-187	31.45	3.8e-155
chr11-32	chr11	32835228	32835404	28.64	3.22e-120	60.51	1.47e-194
chr11-33	chr11	38121328	38121504	229.1	1.15e-221	110.09	5.15e-231
chr12-19	chr12	4898170	4898346	229.1	1.15e-221	95.5	2.48e-222
chr13-26	chr13	34038703	34038879	114.55	1.46e-187	87.1	1.02e-216
chr17-26	chr17	88511105	88511281	38.18	4.95e-134	68.33	6.08e-202
chrX-10	chrX	162832201	162832377	57.27	1.12e-153	68.92	1.81e-202
chr1-29	chr1	34103232	34103408	56.87	6.41e-152	31.11	2.05e-153
chr2-37	chr2	44538252	44538428	56.87	6.41e-152	53.54	7.63e-186
chr3-28	chr3	116656321	116656497	113.74	1.66e-185	54.28	1.15e-186
chr3-27	chr3	149219970	149220146	113.74	1.66e-185	42.31	9.79e-172
chr5-39	chr5	73892590	73892766	113.74	1.66e-185	74.96	4.01e-206
chr5-42	chr5	110227560	110227736	113.74	1.66e-185	36.95	1.21e-163
chr5-38	chr5	119694962	119695138	113.74	1.66e-185	92.59	6.57e-219
chr5-46	chr5	132728765	132728941	113.74	1.66e-185	67.85	4.16e-200
chr12-22	chr12	31608228	31608404	56.87	6.41e-152	131.17	4.81e-240
chr12-20	chr12	104433371	104433547	56.87	6.41e-152	84.63	1.84e-213
chr14-25	chr14	20217404	20217580	28.44	9.17e-119	33.63	4.77e-158
chr15-27	chr15	91056215	91056391	227.49	2.62e-219	104.94	1.7e-226
chr19-23	chr19	37400988	37401164	56.87	6.41e-152	79.5	1.11e-209
chrX-8	chrX	101720524	101720700	227.49	2.62e-219	88.43	4.01e-216
chr5-36	chr5	110469677	110469853	22.59	6.88e-107	27.71	1.51e-145
chr7-25	chr7	28692617	28692793	56.47	3.62e-150	60.11	1.86e-191
chr8-30	chr8	3395328	3395504	225.87	5.92e-217	40.28	1.31e-167
chr8-34	chr8	88991938	88992114	28.23	2.59e-117	33.25	2.86e-156
chr9-30	chr9	101041642	101041818	225.87	5.92e-217	56.63	6.91e-188
chr18-26	chr18	67497920	67498096	112.94	1.88e-183	27.32	1.01e-144
chr18-22	chr18	75345042	75345218	28.23	2.59e-117	33.11	5.09e-156
chr1-28	chr1	16130067	16130243	56.06	3.62e-150	49.74	7.15e-179
chr1-34	chr1	72242860	72243036	224.26	5.92e-217	64.12	6.13e-194
chr1-35	chr1	86348922	86349098	224.26	5.92e-217	52.42	5.47e-182
chr1-32	chr1	136613252	136613428	224.26	5.92e-217	66.89	1.9e-196
chr1-33	chr1	182163100	182163276	224.26	5.92e-217	65.75	1.97e-195
chr4-37	chr4	109762794	109762970	56.06	3.62e-150	104.85	2.93e-223
chr6-33	chr6	135042087	135042263	112.13	1.88e-183	26.57	4.45e-142
chr11-36	chr11	52340216	52340392	16.02	2.2e-91	68.06	1.76e-197
chr13-23	chr13	96660255	96660431	28.03	2.59e-117	68.66	5.25e-198
chr15-28	chr15	11461641	11461817	28.03	2.59e-117	69.9	4.55e-199
chr16-14	chr16	69951668	69951844	224.26	5.92e-217	70.53	1.32e-199
chr19-22	chr19	15495552	15495728	112.13	1.88e-183	65.75	1.97e-195
chr19-21	chr19	58969256	58969432	37.38	7.09e-131	72.51	2.97e-201
chr1-39	chr1	72793309	72793485	222.65	1.33e-214	57.92	1.48e-186
chr1-31	chr1	180888832	180889008	37.11	2.65e-129	35.01	4.57e-157
chr2-45	chr2	155079935	155080111	55.66	2.03e-148	74.79	1.2e-201
chr3-30	chr3	17787251	17787427	37.11	2.65e-129	108.49	1.07e-223
chr5-41	chr5	119679983	119680159	111.32	2.11e-181	31.7	2.77e-151
chr7-27	chr7	65157409	65157585	111.32	2.11e-181	80.24	8.26e-206
chr12-16	chr12	41727385	41727561	111.32	2.11e-181	35.99	1.12e-158
chr15-29	chr15	88906435	88906611	222.65	1.33e-214	97.51	2.33e-217
chr17-28	chr17	46812523	46812699	111.32	2.11e-181	38.51	1.27e-162
chr17-35	chr17	79342748	79342924	37.11	2.65e-129	31.19	2.45e-150
chr18-19	chr18	75360922	75361098	55.66	2.03e-148	39.5	4.2e-164
chr2-41	chr2	105691315	105691491	27.63	2.02e-114	42.48	3.75e-167
chr5-40	chr5	118444656	118444832	27.63	2.02e-114	28.01	4.34e-143
chr8-33	chr8	118524035	118524211	55.26	1.13e-146	82.23	9.03e-206
chr11-37	chr11	68348227	68348403	110.52	2.34e-179	59.74	4.91e-187
chr12-25	chr12	118917881	118918057	221.03	2.94e-212	114.14	4.43e-225
chr18-21	chr18	81197405	81197581	55.26	1.13e-146	82.23	9.03e-206
chr3-29	chr3	103850615	103850791	219.42	6.47e-210	93.72	6.36e-212
chr5-44	chr5	113597208	113597384	54.85	6.2e-145	52.72	2e-178
chr7-28	chr7	34165308	34165484	219.42	6.47e-210	45.46	7.5e-170
chr8-32	chr8	24153156	24153332	27.43	5.55e-113	70.95	1.11e-195
chr8-31	chr8	91365981	91366157	36.57	3.6e-126	56.65	1.34e-182
chr10-7	chr10	12614479	12614655	54.85	6.2e-145	31.9	1.78e-149
chr11-34	chr11	63533667	63533843	54.85	6.2e-145	76.68	3.29e-200
chr12-18	chr12	3738901	3739077	219.42	6.47e-210	69.64	1.33e-194
chr12-34	chr12	35642612	35642788	219.42	6.47e-210	57.95	6.49e-184
chr14-28	chr14	86396113	86396289	109.71	2.57e-177	66.01	1.75e-191
chr18-23	chr18	30121730	30121906	54.85	6.2e-145	52.72	2e-178
chrX-9	chrX	52759364	52759540	219.42	6.47e-210	43.88	8.19e-168
chr2-44	chr2	31163768	31163944	27.23	1.51e-111	30.63	4.29e-146
chr6-28	chr6	148599131	148599307	217.81	1.41e-207	61.77	2.96e-186
chr8-38	chr8	89271768	89271944	36.3	1.31e-124	44.07	7.75e-167
chr13-29	chr13	55247420	55247596	54.45	3.38e-143	66.1	3.61e-190
chr14-26	chr14	15978495	15978671	54.45	3.38e-143	129.92	2.35e-229
chr17-37	chr17	36995591	36995767	108.9	2.8e-175	27.91	8.03e-141
chr17-33	chr17	70403844	70404020	54.45	3.38e-143	91.9	3.07e-209
chr18-16	chr18	35757697	35757873	108.9	2.8e-175	32.62	1.15e-149
chr19-25	chr19	10972827	10973003	27.23	1.51e-111	39.66	8.32e-161
chr2-43	chr2	168764642	168764818	216.19	1.41e-207	24.69	6.4e-133
chr6-30	chr6	23923850	23924026	54.05	3.38e-143	106.85	2.16e-216
chr9-33	chr9	71879500	71879676	216.19	1.41e-207	52.67	8.76e-176
chr10-5	chr10	95175335	95175511	27.02	1.51e-111	24.69	6.4e-133
chr12-21	chr12	70711105	70711281	27.02	1.51e-111	47.64	4.69e-170
chr13-25	chr13	13647388	13647564	216.19	1.41e-207	111.64	6.44e-219
chr18-25	chr18	75465024	75465200	36.03	1.31e-124	80.43	4.91e-200
chr2-49	chr2	172577361	172577537	107.29	3.03e-173	49.49	5.87e-171
chr7-31	chr7	102415909	102416085	107.29	3.03e-173	128	3.93e-225
chr7-29	chr7	113142475	113142651	214.58	3.05e-205	41.02	2.4e-160
chr8-37	chr8	54076380	54076556	53.64	1.82e-141	55.4	2.38e-177
chr8-35	chr8	97397075	97397251	107.29	3.03e-173	161.39	1.97e-238
chr9-35	chr9	97852953	97853129	107.29	3.03e-173	112.48	9.91e-218
chr16-18	chr16	9230211	9230387	214.58	3.05e-205	79.83	3.95e-198
chr16-16	chr16	31891026	31891202	35.76	4.71e-123	58	5.98e-180
chr1-37	chr1	79602608	79602784	26.62	1.09e-108	113.35	1.51e-216
chr1-41	chr1	122607433	122607609	26.62	1.09e-108	85.67	1.17e-200
chr3-32	chr3	86845127	86845303	53.24	9.76e-140	47.54	2.01e-167
chr5-49	chr5	25554800	25554976	106.48	3.24e-171	59.42	5.64e-180
chr6-29	chr6	4677581	4677757	212.97	6.52e-203	55.82	1.88e-176
chr9-34	chr9	24160366	24160542	35.49	1.68e-121	64.63	1.02e-184
chr14-27	chr14	19990713	19990889	106.48	3.24e-171	52.63	3.85e-173
chr2-48	chr2	119855706	119855882	52.84	5.17e-138	27.59	4.4e-136
chr2-55	chr2	169293474	169293650	105.68	3.43e-169	75.38	5.79e-192
chr2-50	chr2	174051296	174051472	105.68	3.43e-169	88.1	1.01e-200
chr4-40	chr4	130102256	130102432	15.1	4.91e-83	43.27	6.21e-161
chr8-41	chr8	112033140	112033316	52.84	5.17e-138	64.14	6.59e-183
chr11-42	chr11	10051661	10051837	52.84	5.17e-138	74.61	2.18e-191
chr11-43	chr11	10337870	10338046	105.68	3.43e-169	137.97	5.15e-226
chr11-45	chr11	22607725	22607901	105.68	3.43e-169	59.45	1.18e-178
chr18-24	chr18	34778729	34778905	26.42	2.9e-107	45.7	5.61e-164
chrX-11	chrX	8219745	8219921	35.23	5.93e-120	107.53	6e-212
chr1-36	chr1	59423262	59423438	104.87	3.61e-167	38.19	7.58e-153
chr1-38	chr1	182030276	182030452	104.87	3.61e-167	24.19	6.58e-128
chr2-47	chr2	104588654	104588830	104.87	3.61e-167	64.79	4.39e-182
chr6-38	chr6	122342221	122342397	34.96	2.08e-118	12.58	4.05e-93
chr8-42	chr8	34727789	34727965	104.87	3.61e-167	32.69	2.63e-144
chr17-38	chr17	69222008	69222184	52.43	2.72e-136	81.53	6.95e-195
chr2-52	chr2	119730846	119731022	208.12	2.9e-198	104.36	4.45e-207
chr2-51	chr2	174665485	174665661	208.12	2.9e-198	105.89	6.88e-208
chr6-32	chr6	92247445	92247621	208.12	2.9e-198	18.85	1.28e-113
chr6-37	chr6	117198988	117199164	104.06	3.61e-167	66.06	9.03e-182
chr6-31	chr6	140336427	140336603	34.69	2.08e-118	63.72	8.79e-180
chr7-30	chr7	145139273	145139449	208.12	2.9e-198	36.93	7.56e-150
chr8-39	chr8	116673723	116673899	26.02	7.61e-106	34.95	7.38e-147
chr9-32	chr9	14680661	14680837	34.69	2.08e-118	46.76	9.34e-163
chr11-38	chr11	12467322	12467498	26.02	7.61e-106	32.58	4.89e-143
chr11-39	chr11	27800063	27800239	104.06	3.61e-167	82.76	3.13e-194
chr11-40	chr11	104944836	104945012	208.12	2.9e-198	144.01	5.59e-225
chr12-23	chr12	39888625	39888801	26.02	7.61e-106	80.91	5.67e-193
chr12-24	chr12	110837393	110837569	208.12	2.9e-198	39.35	2.59e-153
chr12-26	chr12	118659501	118659677	104.06	3.61e-167	60.51	6.25e-177
chr13-24	chr13	12440934	12441110	104.06	3.61e-167	91.15	1.42e-199
chr16-17	chr16	48475294	48475470	104.06	3.61e-167	72.01	1.57e-186
chr2-54	chr2	157376515	157376691	34.42	7.2e-117	90.44	1.3e-197
chr3-33	chr3	60855856	60856032	103.26	3.75e-165	70.74	3.98e-184
chr4-41	chr4	35006649	35006825	103.26	3.75e-165	72.91	8.85e-186
chr4-44	chr4	108182372	108182548	103.26	3.75e-165	96.55	3.29e-201
chr7-32	chr7	3193196	3193372	51.63	1.41e-134	64.95	1.89e-179
chr9-36	chr9	110948102	110948278	20.65	7.05e-95	15.7	3.47e-103
chr9-31	chr9	111725051	111725227	206.51	6.04e-196	59.05	3.08e-174
chr11-49	chr11	4246274	4246450	206.51	6.04e-196	59.05	3.08e-174
chr11-41	chr11	6895216	6895392	103.26	3.75e-165	57.62	6.72e-173
chr12-28	chr12	91583531	91583707	206.51	6.04e-196	73.66	2.42e-186
chr14-30	chr14	34316428	34316604	206.51	6.04e-196	38.62	3.95e-151
chr1-57	chr1	45358133	45358309	102.45	3.86e-163	73.84	4.87e-185
chr1-40	chr1	192515525	192515701	204.9	1.24e-193	107.41	1.79e-205
chr2-58	chr2	168214180	168214356	102.45	3.86e-163	84.39	2.6e-192
chr3-31	chr3	28038198	28038374	102.45	3.86e-163	52.9	6.14e-167
chr4-39	chr4	109026657	109026833	51.22	7.28e-133	44.58	1.07e-157
chr5-45	chr5	33922832	33923008	34.15	2.47e-115	28.82	2.69e-134
chr5-48	chr5	127338976	127339152	25.61	5.1e-103	107.41	1.79e-205
chr6-34	chr6	108071061	108071237	102.45	3.86e-163	79.65	3.68e-189
chr8-40	chr8	128043035	128043211	204.9	1.24e-193	101.27	2.94e-202
chr9-39	chr9	46890035	46890211	102.45	3.86e-163	38.95	2.02e-150
chr11-44	chr11	80132118	80132294	204.9	1.24e-193	29.05	9.9e-135
chr12-31	chr12	53467592	53467768	204.9	1.24e-193	147.69	6.68e-223
chr13-27	chr13	58904873	58905049	34.15	2.47e-115	39.83	1.29e-151
chr16-19	chr16	25871709	25871885	204.9	1.24e-193	90.88	2.37e-196
chr18-29	chr18	38904074	38904250	34.15	2.47e-115	33.76	9.58e-143
chr4-50	chr4	61990057	61990233	203.28	2.54e-191	96.34	5.58e-198
chr9-37	chr9	15175507	15175683	101.64	3.94e-161	53.69	1.98e-166
chr13-30	chr13	52252388	52252564	50.82	3.71e-131	85.77	1.09e-191
chr19-27	chr19	59707204	59707380	33.88	8.41e-114	89.03	1.05e-193
chr2-53	chr2	13697585	13697761	201.67	5.13e-189	64.01	1.64e-174
chr2-61	chr2	180727755	180727931	25.21	3.28e-100	39.87	2.55e-149
chr4-45	chr4	99161453	99161629	201.67	5.13e-189	78.4	2.32e-185
chr5-52	chr5	131563928	131564104	100.84	3.98e-159	87.22	4.44e-191
chr11-50	chr11	34113111	34113287	100.84	3.98e-159	57.19	1.7e-168
chr11-47	chr11	44767346	44767522	100.84	3.98e-159	65.82	5.29e-176
chr12-29	chr12	86498879	86499055	100.84	3.98e-159	9.9	9.17e-78
chr13-28	chr13	54215991	54216167	50.42	1.88e-129	40.1	1.27e-149
chr13-31	chr13	98306477	98306653	33.61	2.83e-112	63.43	5.05e-174
chr15-33	chr15	75877896	75878072	201.67	5.13e-189	55.82	3.37e-167
chr16-20	chr16	12960943	12961119	50.42	1.88e-129	60.15	3.47e-171
chr18-27	chr18	80005262	80005438	50.42	1.88e-129	61.2	4.09e-172
chr19-24	chr19	21818088	21818264	50.42	1.88e-129	51.3	1.05e-162
chr19-26	chr19	47450838	47451014	33.61	2.83e-112	45.6	1.92e-156
chr6-44	chr6	29631966	29632142	20.01	5.99e-91	46.14	7.94e-156
chr6-45	chr6	54096979	54097155	33.34	2.83e-112	28.72	5.4e-131
chr6-35	chr6	80589812	80589988	200.06	5.13e-189	72.86	5.33e-180
chr6-42	chr6	112885360	112885536	100.03	3.98e-159	109.86	7.14e-202
chr8-43	chr8	25455124	25455300	200.06	5.13e-189	82.4	1.53e-186
chr9-38	chr9	65641171	65641347	20.01	5.99e-91	47.73	1.3e-157
chr11-53	chr11	112959650	112959826	200.06	5.13e-189	78.65	4.56e-184
chr12-38	chr12	72649947	72650123	33.34	2.83e-112	29.08	1.2e-131
chr12-27	chr12	76549318	76549494	50.01	1.88e-129	28.72	5.4e-131
chr14-31	chr14	105920917	105921093	25.01	3.28e-100	35.13	1.64e-141
chr17-36	chr17	79654352	79654528	200.06	5.13e-189	74.42	3.95e-181
chr18-30	chr18	70540143	70540319	50.01	1.88e-129	87.61	8.28e-190
chr19-28	chr19	41522357	41522533	200.06	5.13e-189	84.41	7.98e-188
chr1-44	chr1	54485046	54485222	198.44	1.03e-186	37.93	2.29e-144
chr1-43	chr1	171221637	171221813	14.17	4.85e-76	61.85	6.03e-170
chr2-60	chr2	24912326	24912502	33.07	9.45e-111	73.04	1.08e-178
chr3-39	chr3	133518829	133519005	49.61	9.38e-128	37.31	1.64e-143
chr5-58	chr5	22309053	22309229	49.61	9.38e-128	85.82	3.35e-187
chr6-46	chr6	54855002	54855178	24.81	8.21e-99	31.35	1.77e-134
chr6-36	chr6	85019263	85019439	198.44	1.03e-186	91.54	1.31e-190
chr6-39	chr6	94849757	94849933	198.44	1.03e-186	105.63	3.54e-198
chr8-36	chr8	43320740	43320916	198.44	1.03e-186	54.93	1.04e-163
chr10-9	chr10	23813322	23813498	19.84	1.2e-89	36.91	5.98e-143
chr11-48	chr11	62510988	62511164	99.22	3.98e-157	27.68	4.63e-128
chr13-35	chr13	63095044	63095220	198.44	1.03e-186	47.02	1.42e-155
chr15-30	chr15	55317954	55318130	99.22	3.98e-157	78.92	8.95e-183
chr16-21	chr16	30741288	30741464	33.07	9.45e-111	49.04	9.03e-158
chr2-64	chr2	121643103	121643279	98.42	3.94e-155	37.62	8.69e-143
chr3-41	chr3	133532711	133532887	98.42	3.94e-155	23.65	5.28e-119
chr4-46	chr4	29091893	29092069	98.42	3.94e-155	34.92	6e-139
chr4-43	chr4	118540029	118540205	49.21	4.64e-126	68.79	4e-174
chr4-42	chr4	136317816	136317992	196.83	2.03e-184	46.01	3.38e-153
chr5-50	chr5	106381004	106381180	98.42	3.94e-155	38.47	6.11e-144
chr5-53	chr5	129270238	129270414	14.06	6.87e-75	47.96	2.41e-155
chr5-55	chr5	133675774	133675950	49.21	4.64e-126	108.09	8.55e-198
chr8-45	chr8	89823717	89823893	196.83	2.03e-184	38.04	2.32e-143
chr10-8	chr10	118044878	118045054	49.21	4.64e-126	24.15	4.5e-120
chr15-32	chr15	88708947	88709123	49.21	4.64e-126	41.02	2.96e-147
chr18-28	chr18	17612473	17612649	98.42	3.94e-155	106.4	5.74e-197
chr18-33	chr18	56466611	56466787	49.21	4.64e-126	50.44	5.73e-158
chr19-31	chr19	23152228	23152404	32.81	3.12e-109	20.76	2.02e-112
chrX-12	chrX	8207242	8207418	24.6	2.03e-97	43.1	8.24e-150
chrX-15	chrX	52167607	52167783	49.21	4.64e-126	37.83	4.5e-143
chrX-13	chrX	52277680	52277856	196.83	2.03e-184	86.2	6.31e-186
chr2-59	chr2	22620076	22620252	97.61	3.86e-153	60.3	6.65e-166
chr2-56	chr2	26442921	26443097	195.22	3.98e-182	62.54	8.77e-168
chr2-78	chr2	119857495	119857671	195.22	3.98e-182	25.49	7.95e-122
chr3-35	chr3	121794284	121794460	32.54	1.02e-107	110.72	1.93e-197
chr4-47	chr4	119498474	119498650	97.61	3.86e-153	75.89	8.34e-178
chr5-51	chr5	27243311	27243487	97.61	3.86e-153	58.22	4.33e-164
chr5-54	chr5	64048739	64048915	97.61	3.86e-153	59.77	1.92e-165
chr12-33	chr12	12788042	12788218	12.2	1.51e-68	13.32	1.34e-89
chr15-34	chr15	39646720	39646896	195.22	3.98e-182	63.72	9.46e-169
chr18-32	chr18	38570739	38570915	32.54	1.02e-107	29.49	3.2e-129
chr1-46	chr1	137051701	137051877	193.6	7.72e-180	91.76	3.95e-186
chr2-70	chr2	131765636	131765812	193.6	7.72e-180	74.42	2.38e-175
chr3-34	chr3	54990178	54990354	24.2	1.21e-94	62.6	1.83e-166
chr6-41	chr6	12551280	12551456	193.6	7.72e-180	90.52	1.99e-185
chr6-43	chr6	115335670	115335846	193.6	7.72e-180	63.19	6.03e-167
chr10-6	chr10	21102061	21102237	32.27	3.3e-106	20.55	4.29e-110
chr11-51	chr11	120805761	120805937	193.6	7.72e-180	56.76	1.89e-161
chr12-30	chr12	27083246	27083422	48.4	1.1e-122	76.99	4.29e-177
chr12-32	chr12	106447145	106447321	48.4	1.1e-122	79.74	6.71e-179
chr13-33	chr13	17700395	17700571	48.4	1.1e-122	72.02	1.15e-173
chr14-35	chr14	58101467	58101643	32.27	3.3e-106	68.35	5.66e-171
chr17-41	chr17	85142774	85142950	193.6	7.72e-180	76.99	4.29e-177
chr19-29	chr19	4849930	4850106	96.8	3.75e-151	66.98	6.17e-170
chr1-48	chr1	11330318	11330494	19.2	1.74e-84	81	3.15e-178
chr1-42	chr1	84549704	84549880	48	5.3e-121	100.64	2.54e-189
chr2-68	chr2	36023417	36023593	96	3.6e-149	88.56	8.73e-183
chr2-69	chr2	105677447	105677623	16	2.15e-77	35.71	1.06e-136
chr2-63	chr2	149983209	149983385	96	3.6e-149	37.74	1.76e-139
chr9-40	chr9	61386439	61386615	96	3.6e-149	35.52	1.97e-136
chr11-56	chr11	111043371	111043547	96	3.6e-149	87.4	4.15e-182
chr14-37	chr14	63586258	63586434	191.99	1.48e-177	59.31	2.4e-162
chr14-32	chr14	118977459	118977635	48	5.3e-121	57.26	1.46e-160
chr2-65	chr2	45158588	45158764	190.38	1.48e-177	48.43	8.28e-151
chr2-71	chr2	147033172	147033348	190.38	1.48e-177	77.49	1.68e-174
chr3-48	chr3	95370203	95370379	190.38	1.48e-177	146.37	8.68e-207
chr3-43	chr3	103107950	103108126	19.04	1.74e-84	53.99	2.88e-156
chr8-44	chr8	85498761	85498937	47.59	5.3e-121	57.78	1.11e-159
chr13-36	chr13	47855540	47855716	190.38	1.48e-177	35.03	1.29e-134
chr14-38	chr14	64408347	64408523	95.19	3.6e-149	62.73	7.95e-164
chr16-22	chr16	48608423	48608599	95.19	3.6e-149	34.85	2.37e-134
chr17-40	chr17	80151421	80151597	15.86	2.15e-77	115.55	9.19e-195
chr18-31	chr18	54719248	54719424	190.38	1.48e-177	30.21	2.92e-127
chr18-36	chr18	82477379	82477555	31.73	1.06e-104	79.36	1.05e-175
chr1-54	chr1	134570694	134570870	47.19	2.52e-119	35.49	3.92e-134
chr1-49	chr1	135724244	135724420	31.46	3.34e-103	65.31	1.81e-164
chr1-47	chr1	180571267	180571443	47.19	2.52e-119	48.74	7.35e-150
chr2-74	chr2	10521807	10521983	94.38	3.42e-147	89.46	2.98e-180
chr2-66	chr2	57256473	57256649	188.76	2.82e-175	85.93	3.14e-178
chr3-38	chr3	102083968	102084144	94.38	3.42e-147	44.73	1.35e-145
chr3-40	chr3	127463829	127464005	31.46	3.34e-103	29.03	3.15e-124
chr4-48	chr4	40856660	40856836	188.76	2.82e-175	90.7	6.04e-181
chr9-41	chr9	31619477	31619653	31.46	3.34e-103	123.22	2.27e-196
chr11-46	chr11	24630592	24630768	188.76	2.82e-175	49.1	3.11e-150
chr15-31	chr15	25769993	25770169	94.38	3.42e-147	14.51	9.63e-91
chr19-30	chr19	38348406	38348582	47.19	2.52e-119	55.35	3.38e-156
chr2-62	chr2	5357155	5357331	93.58	3.21e-145	58.33	1.76e-157
chr2-83	chr2	30135249	30135425	18.72	6.21e-82	44.96	1.27e-144
chr2-67	chr2	146823514	146823690	187.15	5.29e-173	58.86	6.26e-158
chr2-73	chr2	153643110	153643286	31.19	1.05e-101	29.57	4.42e-124
chr4-54	chr4	40238468	40238644	31.19	1.05e-101	63.48	1.13e-161
chr4-55	chr4	59896063	59896239	93.58	3.21e-145	74.42	1.43e-169
chr5-57	chr5	110839812	110839988	13.37	3.34e-69	102.78	1.2e-185
chr6-47	chr6	124831762	124831938	46.79	1.18e-117	50.59	1.96e-150
chr11-52	chr11	7531963	7532139	93.58	3.21e-145	29.3	1.23e-123
chr11-61	chr11	8754594	8754770	93.58	3.21e-145	88.7	2.67e-178
chr13-34	chr13	28780613	28780789	31.19	1.05e-101	83.01	5.31e-175
chr13-37	chr13	114407090	114407266	93.58	3.21e-145	31.58	2.67e-127
chr14-33	chr14	61736889	61737065	46.79	1.18e-117	86.33	5.92e-177
chr17-42	chr17	52728869	52729045	93.58	3.21e-145	101.17	7.36e-185
chr1-53	chr1	166142443	166142619	185.54	9.85e-171	45.53	5.34e-144
chr1-45	chr1	176644255	176644431	185.54	9.85e-171	34.14	5.41e-130
chr6-50	chr6	50429383	50429559	185.54	9.85e-171	108.8	7.04e-187
chr7-35	chr7	122279626	122279802	92.77	2.99e-143	118.87	2.88e-191
chr8-46	chr8	63929822	63929998	30.92	3.25e-100	35.66	4.2e-132
chr9-43	chr9	120149536	120149712	92.77	2.99e-143	36.68	1.8e-133
chr12-36	chr12	100337724	100337900	92.77	2.99e-143	52.62	4.42e-151
chr13-38	chr13	3712882	3713058	30.92	3.25e-100	118.87	2.88e-191
chr15-35	chr15	6628755	6628931	185.54	9.85e-171	52.19	1.11e-150
chr15-36	chr15	67071045	67071221	46.38	5.51e-116	49	1.35e-147
chr17-44	chr17	31307890	31308066	23.19	3.77e-89	58.36	3.68e-156
chr17-39	chr17	36997534	36997710	18.55	1.16e-80	20.98	1.42e-106
chrX-14	chrX	86016636	86016812	185.54	9.85e-171	72.12	1.41e-166
chr1-50	chr1	63243983	63244159	91.96	2.75e-141	33.67	3.32e-128
chr1-59	chr1	193732267	193732443	91.96	2.75e-141	33.14	1.9e-127
chr5-62	chr5	88679450	88679626	91.96	2.75e-141	62.39	4.53e-158
chr5-64	chr5	111044321	111044497	18.39	2.13e-79	84.84	4.37e-173
chr6-40	chr6	7823010	7823186	183.92	1.81e-168	45.45	1.1e-142
chr6-53	chr6	60409175	60409351	45.98	2.53e-114	38.57	9.61e-135
chr8-53	chr8	107110793	107110969	45.98	2.53e-114	46.11	2.21e-143
chr8-48	chr8	111588330	111588506	91.96	2.75e-141	70.7	3.56e-164
chr9-44	chr9	48839649	48839825	91.96	2.75e-141	90.9	1.83e-176
chr10-10	chr10	43477570	43477746	45.98	2.53e-114	17.53	3.11e-97
chr14-36	chr14	63500336	63500512	183.92	1.81e-168	12.8	1.03e-82
chr2-82	chr2	20209349	20209525	45.58	2.53e-114	97.04	4.2e-178
chr2-89	chr2	122352041	122352217	91.16	2.75e-141	85.24	8.29e-172
chr3-44	chr3	31001370	31001546	45.58	2.53e-114	36.89	1.89e-131
chr3-37	chr3	73434401	73434577	91.16	2.75e-141	92.76	6.53e-176
chr5-63	chr5	114299676	114299852	182.31	1.81e-168	54.37	4.52e-150
chr5-56	chr5	128291278	128291454	22.79	8.68e-88	65.7	3.33e-159
chr7-42	chr7	80745476	80745652	30.39	9.97e-99	13.8	2.06e-85
chr7-37	chr7	112688643	112688819	91.16	2.75e-141	8.6	2.36e-64
chr8-58	chr8	40192308	40192484	182.31	1.81e-168	146.68	3.26e-198
chr8-47	chr8	73104233	73104409	91.16	2.75e-141	74.21	4.31e-165
chr8-56	chr8	88953270	88953446	30.39	9.97e-99	42.62	2.31e-138
chr9-52	chr9	49653987	49654163	91.16	2.75e-141	37.1	9.9e-132
chr9-48	chr9	77777197	77777373	182.31	1.81e-168	62.45	9.45e-157
chr12-35	chr12	71476377	71476553	45.58	2.53e-114	62.45	9.45e-157
chr13-32	chr13	115100713	115100889	91.16	2.75e-141	45.38	2.26e-141
chr2-76	chr2	104855876	104856052	45.17	1.15e-112	61.9	5.9e-155
chr2-72	chr2	153370945	153371121	90.35	2.5e-139	68.7	5.98e-160
chr4-49	chr4	108219042	108219218	22.59	1.98e-86	60.7	5.12e-154
chr5-60	chr5	53466922	53467098	30.12	3.02e-97	27.42	2.49e-116
chr7-40	chr7	24879671	24879847	45.17	1.15e-112	50.01	9.03e-145
chr7-36	chr7	131656138	131656314	45.17	1.15e-112	52.53	4.07e-147
chr8-50	chr8	49194888	49195064	180.7	3.3e-166	48.84	1.22e-143
chr8-51	chr8	67901489	67901665	90.35	2.5e-139	99.23	1.28e-177
chr9-47	chr9	20453709	20453885	90.35	2.5e-139	58.98	1.21e-152
chr11-55	chr11	29714279	29714455	90.35	2.5e-139	47.72	1.55e-142
chr11-54	chr11	119156270	119156446	180.7	3.3e-166	69.46	1.77e-160
chr17-45	chr17	22118893	22119069	180.7	3.3e-166	82.26	1.35e-168
chr1-51	chr1	74825028	74825204	17.91	6.98e-77	67.35	1.36e-157
chr1-52	chr1	136674853	136675029	12.79	9.8e-65	26.03	6.71e-113
chr1-55	chr1	139494715	139494891	29.85	9.08e-96	50.79	3.21e-144
chr2-85	chr2	34399613	34399789	89.54	2.25e-137	65.91	1.43e-156
chr2-81	chr2	76442101	76442277	89.54	2.25e-137	96.81	7.15e-175
chr2-79	chr2	167144863	167145039	44.77	5.19e-111	79.43	1.92e-165
chr3-36	chr3	34654002	34654178	29.85	9.08e-96	34.81	1.93e-126
chr4-51	chr4	65238692	65238868	22.39	4.45e-85	80.47	4.66e-166
chr5-61	chr5	77262240	77262416	22.39	4.45e-85	41.86	4.16e-135
chr5-59	chr5	134942886	134943062	44.77	5.19e-111	22.53	3.22e-106
chr6-49	chr6	128261739	128261915	17.91	6.98e-77	35.4	3.09e-127
chr7-41	chr7	49348030	49348206	22.39	4.45e-85	22.95	4.59e-107
chr9-59	chr9	8770113	8770289	89.54	2.25e-137	110.64	3.01e-181
chr11-60	chr11	20466710	20466886	179.08	5.94e-164	47.3	7.39e-141
chr14-41	chr14	11699762	11699938	89.54	2.25e-137	32.78	1.24e-123
chr14-42	chr14	23563324	23563500	179.08	5.94e-164	86.05	2.95e-169
chr14-40	chr14	44994453	44994629	179.08	5.94e-164	87.27	6.37e-170
chr14-39	chr14	48709510	48709686	29.85	9.08e-96	78.43	7.75e-165
chr15-37	chr15	46087406	46087582	44.77	5.19e-111	177.02	9.57e-204
chr15-39	chr15	93519615	93519791	29.85	9.08e-96	13.35	1.86e-82
chr17-43	chr17	21375405	21375581	179.08	5.94e-164	123.92	1.14e-186
chr1-61	chr1	42058606	42058782	88.74	2.01e-135	76.75	2.38e-162
chr2-96	chr2	40910992	40911168	177.47	1.06e-161	97.46	1.25e-173
chr2-77	chr2	147011547	147011723	88.74	2.01e-135	47.6	6.67e-140
chr3-47	chr3	88646503	88646679	22.18	9.9e-84	60.79	2.24e-151
chr4-56	chr4	25796256	25796432	88.74	2.01e-135	36.12	4.93e-127
chr5-65	chr5	122991429	122991605	88.74	2.01e-135	45.15	1.97e-137
chr6-51	chr6	143142261	143142437	29.58	2.69e-94	38.14	1.46e-129
chr7-39	chr7	35467988	35468164	44.37	2.31e-109	54.34	4.18e-146
chr7-33	chr7	65454160	65454336	44.37	2.31e-109	37.9	2.83e-129
chr7-34	chr7	83376979	83377155	44.37	2.31e-109	62.65	8.57e-153
chr8-62	chr8	108535475	108535651	44.37	2.31e-109	77.72	6.08e-163
chr9-42	chr9	115724102	115724278	44.37	2.31e-109	56.85	3.15e-148
chr12-40	chr12	54111047	54111223	44.37	2.31e-109	54.34	4.18e-146
chr12-37	chr12	102514868	102515044	177.47	1.06e-161	68.99	2.51e-157
chr13-41	chr13	94576030	94576206	88.74	2.01e-135	55.82	2.28e-147
chr16-25	chr16	20191284	20191460	88.74	2.01e-135	70.57	2.14e-158
chr16-24	chr16	35146298	35146474	177.47	1.06e-161	79.74	3.75e-164
chr17-46	chr17	70865268	70865444	44.37	2.31e-109	16.33	1.06e-90
chr18-34	chr18	5012210	5012386	29.58	2.69e-94	25.37	1.02e-110
chr18-35	chr18	55031032	55031208	177.47	1.06e-161	102.33	6.13e-176
chr19-33	chr19	12732087	12732263	88.74	2.01e-135	31.49	1.13e-120
chrX-20	chrX	75882882	75883058	177.47	1.06e-161	130.64	1.66e-187
chr2-88	chr2	50980366	50980542	29.31	7.91e-93	112.67	7.12e-179
chr2-103	chr2	166066472	166066648	43.96	1.02e-107	75.11	6.96e-160
chr5-66	chr5	108035661	108035837	43.96	1.02e-107	54.81	3.36e-145
chr9-46	chr9	120690597	120690773	14.65	6.31e-68	41.96	8.19e-133
chr11-66	chr11	8635923	8636099	21.98	2.18e-82	45.75	8.25e-137
chr11-62	chr11	22949117	22949293	43.96	1.02e-107	50.28	3.41e-141
chr12-39	chr12	83569939	83570115	175.86	1.86e-159	58.5	3.14e-148
chr13-39	chr13	54159403	54159579	87.93	1.77e-133	65.42	1.95e-153
chr15-38	chr15	16446652	16446828	87.93	1.77e-133	86.92	1.04e-166
chr15-40	chr15	99874641	99874817	87.93	1.77e-133	15.25	7.46e-87
chr19-32	chr19	55543298	55543474	21.98	2.18e-82	53.84	2.27e-144
chrX-16	chrX	51036037	51036213	175.86	1.86e-159	119.3	1.48e-181
chr1-63	chr1	120759500	120759676	43.56	1.02e-107	72.63	7.03e-157
chr2-75	chr2	36198770	36198946	87.12	1.77e-133	61.51	3.34e-149
chr2-84	chr2	71719106	71719282	29.04	7.91e-93	78.29	2.36e-160
chr2-92	chr2	148698702	148698878	43.56	1.02e-107	97.23	2.12e-170
chr4-53	chr4	12663317	12663493	87.12	1.77e-133	29.99	2.64e-116
chr4-79	chr4	147128299	147128475	87.12	1.77e-133	74.42	5.23e-158
chr5-71	chr5	59921978	59922154	43.56	1.02e-107	154.57	5.72e-192
chr6-52	chr6	100335980	100336156	87.12	1.77e-133	36.32	5.23e-125
chr7-38	chr7	3213672	3213848	29.04	7.91e-93	17.42	6.02e-92
chr7-43	chr7	116220445	116220621	174.24	1.86e-159	52.42	7.85e-142
chr8-59	chr8	31170816	31170992	174.24	1.86e-159	100.47	6.37e-172
chr9-45	chr9	61468563	61468739	17.42	2.19e-74	44	8.63e-134
chr10-11	chr10	21701676	21701852	43.56	1.02e-107	23.83	6.5e-106
chr11-58	chr11	16345193	16345369	87.12	1.77e-133	75.35	1.39e-158
chr11-63	chr11	23653769	23653945	87.12	1.77e-133	57.97	1.84e-146
chr11-65	chr11	102819689	102819865	43.56	1.02e-107	24.31	8.23e-107
chr15-41	chr15	41451870	41452046	174.24	1.86e-159	76.31	3.64e-159
chr16-23	chr16	23099802	23099978	87.12	1.77e-133	27.4	3.25e-112
chr1-60	chr1	14294433	14294609	172.63	3.24e-157	45.25	7.77e-134
chr2-87	chr2	20496334	20496510	86.32	1.54e-131	41.19	1.43e-129
chr2-80	chr2	58626380	58626556	86.32	1.54e-131	20.31	7.14e-98
chr2-93	chr2	163031818	163031994	86.32	1.54e-131	36.42	5.38e-124
chr3-42	chr3	62938704	62938880	172.63	3.24e-157	51.49	1.02e-139
chr4-57	chr4	58720739	58720915	86.32	1.54e-131	89.14	7.58e-165
chr4-61	chr4	133815815	133815991	172.63	3.24e-157	23.51	2.32e-104
chr4-59	chr4	136594024	136594200	86.32	1.54e-131	67.87	2.44e-152
chr4-65	chr4	142070851	142071027	172.63	3.24e-157	27.15	8.91e-111
chr5-69	chr5	20692299	20692475	43.16	4.42e-106	70.27	6.29e-154
chr5-70	chr5	75013185	75013361	86.32	1.54e-131	41.77	3.35e-130
chr6-55	chr6	122340558	122340734	12.33	1.95e-61	10.04	1.97e-67
chr6-57	chr6	145276540	145276716	43.16	4.42e-106	18.49	1e-93
chr7-50	chr7	43167219	43167395	172.63	3.24e-157	44.57	3.75e-133
chr8-55	chr8	14014762	14014938	43.16	4.42e-106	39.04	3.88e-127
chr8-49	chr8	24044310	24044486	21.58	4.74e-81	42.97	1.73e-131
chr8-52	chr8	84650329	84650505	12.33	1.95e-61	43.6	3.8e-132
chr9-62	chr9	61370384	61370560	43.16	4.42e-106	23.8	6.87e-105
chr11-57	chr11	102820509	102820685	21.58	4.74e-81	25.52	5.12e-108
chr13-42	chr13	35738267	35738443	172.63	3.24e-157	36.2	1.01e-123
chr13-43	chr13	54783291	54783467	172.63	3.24e-157	81.82	6.59e-161
chr14-44	chr14	64642363	64642539	21.58	4.74e-81	45.94	1.57e-134
chrX-17	chrX	157601521	157601697	172.63	3.24e-157	52.85	6.53e-141
chr1-72	chr1	71646029	71646205	171.02	5.57e-155	34.6	1.45e-120
chr1-56	chr1	132879030	132879206	171.02	5.57e-155	55.3	1.18e-141
chr2-91	chr2	128272877	128273053	42.75	1.9e-104	102.01	1.81e-169
chr3-49	chr3	144413111	144413287	28.5	6.58e-90	39.18	3.89e-126
chr3-46	chr3	147298257	147298433	21.38	1.02e-79	65.02	5.49e-149
chr4-58	chr4	137777951	137778127	171.02	5.57e-155	41.67	6.77e-129
chr5-67	chr5	142415505	142415681	171.02	5.57e-155	48.9	4.22e-136
chr6-59	chr6	127250160	127250336	171.02	5.57e-155	64.31	1.72e-148
chr7-44	chr7	3206590	3206766	42.75	1.9e-104	25.61	3.51e-107
chr9-57	chr9	10449250	10449426	171.02	5.57e-155	93.92	1.06e-165
chr9-51	chr9	43210152	43210328	42.75	1.9e-104	56.35	1.66e-142
chr9-54	chr9	48961405	48961581	171.02	5.57e-155	43.51	7.75e-131
chr11-76	chr11	34494829	34495005	28.5	6.58e-90	107.58	6.81e-172
chr11-69	chr11	83974587	83974763	42.75	1.9e-104	85.75	1.47e-161
chr13-49	chr13	44755589	44755765	28.5	6.58e-90	14.47	2.98e-82
chr13-40	chr13	114026483	114026659	42.75	1.9e-104	41.09	2.88e-128
chr14-51	chr14	11663716	11663892	42.75	1.9e-104	42.57	7.43e-130
chr15-42	chr15	12203756	12203932	42.75	1.9e-104	33.24	9.02e-119
chr16-36	chr16	13748868	13749044	85.51	1.32e-129	28.04	3.39e-111
chr18-39	chr18	76556285	76556461	17.1	6.56e-72	46.96	2.82e-134
chrX-23	chrX	152652806	152652982	171.02	5.57e-155	66.48	5.39e-150
chr1-64	chr1	72229117	72229293	42.35	8.09e-103	60.42	2.62e-144
chr1-62	chr1	86201457	86201633	84.7	1.12e-127	86.19	2.78e-160
chr1-66	chr1	89870727	89870903	84.7	1.12e-127	41.27	2.82e-127
chr3-55	chr3	154381649	154381825	42.35	8.09e-103	61.69	3.04e-145
chr4-69	chr4	120755947	120756123	84.7	1.12e-127	48.44	2.06e-134
chr4-63	chr4	136089261	136089437	42.35	8.09e-103	88.8	1.25e-161
chr5-68	chr5	69489151	69489327	84.7	1.12e-127	110.58	1.55e-171
chr6-60	chr6	143020834	143021010	42.35	8.09e-103	106.56	7.32e-170
chr8-57	chr8	25485666	25485842	84.7	1.12e-127	93.03	1e-163
chr9-49	chr9	88483224	88483400	21.18	2.17e-78	75.14	4.2e-154
chr10-15	chr10	70433273	70433449	169.4	9.46e-153	25.71	2.4e-106
chr11-73	chr11	29597284	29597460	84.7	1.12e-127	101.05	1.85e-167
chr13-45	chr13	5878863	5879039	169.4	9.46e-153	81.4	1.05e-157
chr15-43	chr15	25740365	25740541	169.4	9.46e-153	56.35	3.48e-141
chr16-29	chr16	64885702	64885878	84.7	1.12e-127	16.84	5.48e-88
chr17-47	chr17	70828241	70828417	42.35	8.09e-103	15.63	8.68e-85
chr18-38	chr18	77038326	77038502	42.35	8.09e-103	45.79	6.69e-132
chr2-86	chr2	10390890	10391066	167.79	1.59e-150	53.75	9.26e-138
chr2-104	chr2	114178211	114178387	167.79	1.59e-150	61.11	1.88e-143
chr2-98	chr2	120244085	120244261	167.79	1.59e-150	41.46	2.76e-126
chr2-101	chr2	151757562	151757738	41.95	3.4e-101	96.75	6.14e-164
chr3-45	chr3	34761279	34761455	27.97	5.22e-87	6.57	8.84e-49
chr4-66	chr4	11006541	11006717	41.95	3.4e-101	45	6.76e-130
chr4-72	chr4	53789422	53789598	20.97	4.56e-77	61.76	6.36e-144
chr4-64	chr4	138005929	138006105	83.9	9.44e-126	59.85	1.58e-142
chr5-75	chr5	136102056	136102232	83.9	9.44e-126	45.35	3.06e-130
chr6-48	chr6	122341177	122341353	83.9	9.44e-126	9.6	9.23e-64
chr7-52	chr7	107680277	107680453	41.95	3.4e-101	109.53	1.72e-169
chr7-46	chr7	126218387	126218563	83.9	9.44e-126	24.19	1.04e-102
chr8-65	chr8	10924925	10925101	83.9	9.44e-126	39.76	1.95e-124
chr8-61	chr8	11650130	11650306	167.79	1.59e-150	98.39	1.09e-164
chr9-60	chr9	53771458	53771634	16.78	1.88e-69	51.37	9.37e-136
chr9-55	chr9	67347298	67347474	41.95	3.4e-101	71.67	1.52e-150
chr9-50	chr9	90834258	90834434	83.9	9.44e-126	46.44	2.74e-131
chr9-53	chr9	94661841	94662017	83.9	9.44e-126	46.82	1.21e-131
chr10-13	chr10	21988585	21988761	41.95	3.4e-101	21.26	3.8e-97
chr10-16	chr10	59354337	59354513	83.9	9.44e-126	21.99	1.37e-98
chr12-42	chr12	50120747	50120923	83.9	9.44e-126	46.44	2.74e-131
chr13-46	chr13	46645581	46645757	83.9	9.44e-126	44.65	1.48e-129
chr18-37	chr18	38628872	38629048	27.97	5.22e-87	22.07	9.37e-99
chr19-36	chr19	14835695	14835871	20.97	4.56e-77	92.14	9.3e-162
chrX-22	chrX	68512446	68512622	167.79	1.59e-150	109.53	1.72e-169
chr1-68	chr1	137418494	137418670	166.18	1.59e-150	140.23	7.66e-179
chr2-99	chr2	69752805	69752981	27.7	5.22e-87	83.32	9.04e-156
chr2-100	chr2	127605346	127605522	83.09	9.44e-126	53.23	4.98e-136
chr2-110	chr2	135548076	135548252	41.54	3.4e-101	61.82	1.33e-142
chr2-94	chr2	171574463	171574639	166.18	1.59e-150	92.73	1.68e-160
chr3-51	chr3	34735054	34735230	41.54	3.4e-101	74.67	6.33e-151
chr6-54	chr6	91710605	91710781	41.54	3.4e-101	29.94	6.13e-111
chr6-58	chr6	122624564	122624740	41.54	3.4e-101	49.56	6.79e-133
chr8-64	chr8	3400602	3400778	41.54	3.4e-101	47.13	1.1e-130
chr8-60	chr8	97403429	97403605	83.09	9.44e-126	112.73	3.71e-169
chr8-67	chr8	109012718	109012894	83.09	9.44e-126	74.67	6.33e-151
chr8-54	chr8	111622275	111622451	41.54	3.4e-101	26.25	2.92e-105
chr10-12	chr10	8889497	8889673	83.09	9.44e-126	23.18	6.37e-100
chr10-14	chr10	68137387	68137563	83.09	9.44e-126	17.32	1.61e-87
chr13-44	chr13	56143363	56143539	27.7	5.22e-87	31.59	2.96e-113
chr14-45	chr14	55085945	55086121	27.7	5.22e-87	22.72	4.56e-99
chr14-46	chr14	79018683	79018859	83.09	9.44e-126	46.37	5.67e-130
chr1-76	chr1	36834160	36834336	82.28	7.83e-124	80.19	1.34e-152
chr2-90	chr2	153622584	153622760	164.56	2.64e-148	63.26	3.06e-142
chr9-63	chr9	70223370	70223546	164.56	2.64e-148	53.71	4.08e-135
chr9-61	chr9	77759299	77759475	41.14	1.41e-99	70.29	7.72e-147
chr9-64	chr9	107594415	107594591	82.28	7.83e-124	72.07	6.24e-148
chr9-58	chr9	108710851	108711027	41.14	1.41e-99	72.07	6.24e-148
chr11-67	chr11	55957402	55957578	164.56	2.64e-148	68.6	8.96e-146
chr11-59	chr11	88629924	88630100	41.14	1.41e-99	29.2	8.46e-109
chr13-51	chr13	24837898	24838074	82.28	7.83e-124	82.51	7.53e-154
chrX-27	chrX	58042010	58042186	164.56	2.64e-148	20.86	1.7e-94
chrX-24	chrX	162756123	162756299	41.14	1.41e-99	61.89	2.78e-141
chr1-74	chr1	66960978	66961154	162.95	4.33e-146	55.82	1.82e-135
chr2-95	chr2	20689530	20689706	81.48	6.42e-122	32.59	2.05e-112
chr3-53	chr3	7366874	7367050	162.95	4.33e-146	106.37	2.19e-163
chr3-59	chr3	118626510	118626686	162.95	4.33e-146	128.13	1.77e-171
chr4-60	chr4	20022336	20022512	162.95	4.33e-146	78.3	4.34e-150
chr6-56	chr6	34901145	34901321	162.95	4.33e-146	77.23	1.72e-149
chr6-63	chr6	71626091	71626267	27.16	3.95e-84	69.6	5.42e-145
chr6-62	chr6	112203418	112203594	81.48	6.42e-122	66.33	6.57e-143
chr7-49	chr7	27622308	27622484	27.16	3.95e-84	82.91	1.45e-152
chr7-51	chr7	45551648	45551824	13.58	4.95e-61	53.69	8.56e-134
chr7-53	chr7	67989609	67989785	40.74	5.79e-98	64.8	6.65e-142
chr7-48	chr7	90025062	90025238	81.48	6.42e-122	55.82	1.82e-135
chr8-66	chr8	107594880	107595056	81.48	6.42e-122	66.33	6.57e-143
chr9-66	chr9	40859322	40859498	162.95	4.33e-146	85.42	7.36e-154
chr9-56	chr9	119571440	119571616	27.16	3.95e-84	75.17	2.54e-148
chr11-64	chr11	33527427	33527603	27.16	3.95e-84	57.53	9.12e-137
chr12-41	chr12	39998139	39998315	20.37	1.94e-74	37.34	3.27e-118
chr13-50	chr13	70155720	70155896	162.95	4.33e-146	134.23	1.67e-173
chr14-47	chr14	118474274	118474450	40.74	5.79e-98	70.47	1.57e-145
chr15-49	chr15	21366495	21366671	162.95	4.33e-146	156.6	3.22e-180
chr18-41	chr18	84934451	84934627	27.16	3.95e-84	33.96	3.58e-114
chr19-35	chr19	23133256	23133432	40.74	5.79e-98	18.42	2.01e-88
chr19-42	chr19	30006486	30006662	40.74	5.79e-98	77.23	1.72e-149
chrX-21	chrX	52189247	52189423	81.48	6.42e-122	74.18	9.51e-148
chrX-28	chrX	77568163	77568339	81.48	6.42e-122	57.53	9.12e-137
chrX-18	chrX	101084277	101084453	81.48	6.42e-122	45.83	5.42e-127
chrX-19	chrX	144337964	144338140	81.48	6.42e-122	20.5	7.17e-93
chr1-69	chr1	151878491	151878667	40.33	2.34e-96	45.75	1.12e-125
chr1-70	chr1	164018314	164018490	80.67	5.2e-120	80.9	5.08e-150
chr3-50	chr3	9008750	9008926	40.33	2.34e-96	53.67	1.8e-132
chr4-73	chr4	82368328	82368504	161.34	7.01e-144	50.29	1.07e-129
chr4-68	chr4	115878308	115878484	40.33	2.34e-96	75.43	5.08e-147
chr4-62	chr4	132649401	132649577	40.33	2.34e-96	40.16	3.83e-120
chr5-77	chr5	34439986	34440162	161.34	7.01e-144	55.82	3.82e-134
chr5-72	chr5	120834006	120834182	161.34	7.01e-144	132.9	2.24e-171
chr5-76	chr5	142957103	142957279	80.67	5.2e-120	40.74	9.32e-121
chr6-67	chr6	67111738	67111914	80.67	5.2e-120	24.81	6.88e-100
chr6-61	chr6	145276033	145276209	13.44	6.68e-60	16.91	4.6e-84
chr7-45	chr7	107349274	107349450	26.89	1.07e-82	66.45	1.36e-141
chr12-47	chr12	16026781	16026957	80.67	5.2e-120	90.03	1.3e-154
chr12-44	chr12	29095961	29096137	80.67	5.2e-120	43.61	1.22e-123
chr12-45	chr12	35896776	35896952	80.67	5.2e-120	103.37	1.48e-160
chr13-48	chr13	21997920	21998096	161.34	7.01e-144	105.32	2.33e-161
chr13-55	chr13	97588208	97588384	80.67	5.2e-120	45.38	2.49e-125
chr13-53	chr13	109633176	109633352	161.34	7.01e-144	25.96	8.72e-102
chr14-50	chr14	70635004	70635180	40.33	2.34e-96	21.72	2.32e-94
chr14-49	chr14	121720071	121720247	80.67	5.2e-120	64.9	1.38e-140
chr15-46	chr15	75948942	75949118	26.89	1.07e-82	90.03	1.3e-154
chr19-44	chr19	11299042	11299218	161.34	7.01e-144	60.02	3.05e-137
chr19-38	chr19	21785328	21785504	80.67	5.2e-120	29.69	2.09e-107
chr1-65	chr1	12744717	12744893	26.62	2.85e-81	23.12	5.25e-96
chr1-71	chr1	39902875	39903051	79.86	4.16e-118	47.23	8.88e-126
chr1-86	chr1	72574180	72574356	159.72	1.12e-141	66.58	2.81e-140
chr1-77	chr1	119497697	119497873	79.86	4.16e-118	56.39	2.99e-133
chr1-67	chr1	161247684	161247860	79.86	4.16e-118	58.79	5.19e-135
chr2-113	chr2	26079531	26079707	79.86	4.16e-118	50.7	9.22e-129
chr2-97	chr2	106750979	106751155	159.72	1.12e-141	71.77	1.86e-143
chr4-70	chr4	140002188	140002364	39.93	9.38e-95	48.05	1.67e-126
chr5-80	chr5	53555602	53555778	79.86	4.16e-118	40.63	1.87e-119
chr6-65	chr6	142867936	142868112	39.93	9.38e-95	77.83	6.71e-147
chr8-63	chr8	67086333	67086509	159.72	1.12e-141	87.71	5.61e-152
chr8-70	chr8	92134281	92134457	26.62	2.85e-81	20.17	2.12e-90
chr10-18	chr10	41401289	41401465	79.86	4.16e-118	39.19	6.11e-118
chr12-43	chr12	40837060	40837236	79.86	4.16e-118	46.83	2.03e-125
chr13-52	chr13	48160269	48160445	79.86	4.16e-118	43.51	2.5e-122
chr15-50	chr15	25753972	25754148	39.93	9.38e-95	21.84	1.15e-93
chr15-44	chr15	66441539	66441715	159.72	1.12e-141	92.1	4.72e-154
chr16-27	chr16	29883201	29883377	159.72	1.12e-141	39.19	6.11e-118
chr17-49	chr17	78480040	78480216	159.72	1.12e-141	65.79	9.03e-140
chr18-49	chr18	5011645	5011821	26.62	2.85e-81	22.1	3.72e-94
chr19-40	chr19	32344411	32344587	39.93	9.38e-95	70.85	6.54e-143
chr19-43	chr19	55589084	55589260	39.93	9.38e-95	55.26	2.13e-132
chr2-102	chr2	163062198	163062374	158.11	1.12e-141	44.47	5.07e-122
chr3-54	chr3	27872590	27872766	79.06	4.16e-118	55.25	4.48e-131
chr4-76	chr4	17092238	17092414	158.11	1.12e-141	99.46	9.32e-156
chr9-65	chr9	8462997	8463173	79.06	4.16e-118	28.94	3.02e-104
chr10-17	chr10	66917890	66918066	79.06	4.16e-118	11.52	3.17e-67
chr11-68	chr11	67024031	67024207	79.06	4.16e-118	12.49	2.16e-70
chr11-75	chr11	96851070	96851246	158.11	1.12e-141	97.68	5.4e-155
chr12-46	chr12	12784321	12784497	26.35	2.85e-81	10.5	1.21e-63
chr13-54	chr13	8191948	8192124	79.06	4.16e-118	65.12	5.94e-138
chr13-56	chr13	37436482	37436658	26.35	2.85e-81	23.48	1.12e-95
chr13-47	chr13	53461444	53461620	79.06	4.16e-118	41.76	2.12e-119
chr15-45	chr15	101277312	101277488	79.06	4.16e-118	51.61	3.2e-128
chr16-32	chr16	91736608	91736784	158.11	1.12e-141	51.61	3.2e-128
chr17-52	chr17	29399317	29399493	39.53	9.38e-95	49.28	2.68e-126
chr19-34	chr19	29945695	29945871	158.11	1.12e-141	63.61	5.76e-137
chr19-39	chr19	32194934	32195110	79.06	4.16e-118	48.41	1.49e-125
chrX-29	chrX	7927141	7927317	79.06	4.16e-118	50.19	4.68e-127
chrX-26	chrX	166619212	166619388	79.06	4.16e-118	52.1	1.29e-128
chr1-75	chr1	13128090	13128266	39.12	3.71e-93	23.75	3.5e-95
chr1-82	chr1	35232767	35232943	156.5	1.77e-139	53.61	1.66e-128
chr1-78	chr1	56684542	56684718	78.25	3.29e-116	66.03	3.87e-137
chr1-73	chr1	62398372	62398548	156.5	1.77e-139	70.32	9.47e-140
chr1-58	chr1	84640729	84640905	156.5	1.77e-139	27.62	2.63e-101
chr2-127	chr2	165943241	165943417	156.5	1.77e-139	125.92	4.91e-164
chr4-67	chr4	57920155	57920331	39.12	3.71e-93	14.06	2.54e-74
chr5-74	chr5	4303632	4303808	26.08	7.51e-80	25.42	6.2e-98
chr5-78	chr5	119585073	119585249	78.25	3.29e-116	23.54	7.88e-95
chr6-64	chr6	98483399	98483575	78.25	3.29e-116	33.84	1.4e-109
chr9-69	chr9	31319053	31319229	156.5	1.77e-139	58.22	6.4e-132
chr11-71	chr11	34739056	34739232	156.5	1.77e-139	57.6	1.77e-131
chr12-50	chr12	40995670	40995846	78.25	3.29e-116	58.22	6.4e-132
chr12-48	chr12	81997656	81997832	26.08	7.51e-80	72.19	7.64e-141
chr16-26	chr16	18460018	18460194	39.12	3.71e-93	53.61	1.66e-128
chr17-50	chr17	82306483	82306659	156.5	1.77e-139	93.35	1.53e-151
chr18-42	chr18	37771577	37771753	26.08	7.51e-80	79.62	6.45e-145
chr19-37	chr19	23075945	23076121	9.78	9.1e-49	56.99	4.87e-131
chr1-87	chr1	179604548	179604724	77.44	2.57e-114	105.07	6.97e-155
chr2-105	chr2	31572117	31572293	19.36	3.04e-69	50.55	8.44e-125
chr2-106	chr2	34937466	34937642	38.72	1.45e-91	55.82	7.45e-129
chr2-111	chr2	146921289	146921465	77.44	2.57e-114	59.54	1.69e-131
chr4-71	chr4	28967653	28967829	154.88	2.76e-137	39.99	3.04e-115
chr4-74	chr4	32196488	32196664	38.72	1.45e-91	79.98	1.26e-143
chr5-79	chr5	34998874	34999050	77.44	2.57e-114	74.42	1.16e-140
chr6-66	chr6	30026956	30027132	11.06	8.15e-52	58.25	1.34e-130
chr7-58	chr7	134022261	134022437	38.72	1.45e-91	50.55	8.44e-125
chr8-69	chr8	64408771	64408947	38.72	1.45e-91	65.35	2.56e-135
chr9-67	chr9	73129705	73129881	25.81	1.95e-78	74.42	1.16e-140
chr10-24	chr10	64736856	64737032	154.88	2.76e-137	29.94	1.62e-103
chr10-26	chr10	78391022	78391198	77.44	2.57e-114	32.48	8.34e-107
chr11-70	chr11	30177287	30177463	154.88	2.76e-137	54.13	1.35e-127
chr11-77	chr11	49739849	49740025	154.88	2.76e-137	39.4	1.22e-114
chr11-86	chr11	101778225	101778401	77.44	2.57e-114	71.45	5.52e-139
chr15-47	chr15	10724940	10725116	154.88	2.76e-137	13.6	2.81e-72
chr16-28	chr16	44764473	44764649	77.44	2.57e-114	52.53	2.26e-126
chr17-48	chr17	62109161	62109337	154.88	2.76e-137	69.59	6.66e-138
chr18-44	chr18	13034598	13034774	77.44	2.57e-114	76.55	8.01e-142
chr1-88	chr1	47834178	47834354	153.27	4.26e-135	110.47	2.44e-155
chr1-79	chr1	60850963	60851139	19.16	5.85e-68	20.32	4.11e-87
chr1-85	chr1	189013422	189013598	12.77	1.97e-55	50.03	4.27e-123
chr2-107	chr2	70127701	70127877	76.64	1.98e-112	65.47	5.3e-134
chr2-116	chr2	77753450	77753626	38.32	5.57e-90	26.92	3.16e-98
chr3-61	chr3	89672663	89672839	153.27	4.26e-135	60.95	4.23e-131
chr3-58	chr3	89826567	89826743	38.32	5.57e-90	26.65	7.97e-98
chr3-62	chr3	108433562	108433738	19.16	5.85e-68	65.47	5.3e-134
chr4-89	chr4	3819533	3819709	76.64	1.98e-112	171.06	3.02e-173
chr4-83	chr4	45591391	45591567	38.32	5.57e-90	35.59	2.23e-109
chr4-78	chr4	137801305	137801481	10.95	8.98e-51	45.71	1.87e-119
chr5-83	chr5	74999156	74999332	25.55	5.01e-77	70.7	3.94e-137
chr5-84	chr5	87350452	87350628	153.27	4.26e-135	147.3	4.08e-167
chr5-93	chr5	118351456	118351632	76.64	1.98e-112	41.75	8.43e-116
chr7-61	chr7	24517148	24517324	38.32	5.57e-90	31.94	4.73e-105
chr7-54	chr7	81480985	81481161	38.32	5.57e-90	44.94	9.17e-119
chr7-59	chr7	108196373	108196549	76.64	1.98e-112	115.28	4.43e-157
chr9-71	chr9	110947451	110947627	38.32	5.57e-90	11.71	7.68e-66
chr10-21	chr10	128369999	128370175	76.64	1.98e-112	26.12	4.92e-97
chr11-87	chr11	19026061	19026237	76.64	1.98e-112	91.43	1.32e-147
chr11-74	chr11	77456060	77456236	153.27	4.26e-135	62.39	4.82e-132
chr13-57	chr13	23492058	23492234	76.64	1.98e-112	74.69	2.32e-139
chr13-60	chr13	74399326	74399502	19.16	5.85e-68	42.09	4.05e-116
chr14-60	chr14	24144946	24145122	153.27	4.26e-135	55.82	1.57e-127
chr14-55	chr14	32379808	32379984	76.64	1.98e-112	31.01	7.25e-104
chr15-48	chr15	38077693	38077869	153.27	4.26e-135	34.89	1.4e-108
chr16-31	chr16	95953234	95953410	153.27	4.26e-135	67.98	1.55e-135
chr18-52	chr18	38592948	38593124	25.55	5.01e-77	34.89	1.4e-108
chr19-50	chr19	44280956	44281132	76.64	1.98e-112	28.51	1.64e-100
chr2-112	chr2	26055497	26055673	75.83	1.5e-110	48.14	2.79e-120
chr3-66	chr3	36223465	36223641	25.28	1.27e-75	99	2.73e-149
chr3-57	chr3	68306821	68306997	37.91	2.12e-88	56.42	1.23e-126
chr4-75	chr4	100779170	100779346	75.83	1.5e-110	45.23	8.57e-118
chr4-86	chr4	119071651	119071827	75.83	1.5e-110	15.21	4.64e-75
chr5-91	chr5	74800797	74800973	75.83	1.5e-110	87.45	2.83e-144
chr5-81	chr5	98255814	98255990	37.91	2.12e-88	70.9	8.03e-136
chr5-73	chr5	144351311	144351487	151.66	6.47e-133	111.64	3.79e-154
chr6-68	chr6	94952302	94952478	151.66	6.47e-133	55.82	3.29e-126
chr7-47	chr7	58225916	58226092	151.66	6.47e-133	33	2.98e-105
chr7-57	chr7	126220693	126220869	75.83	1.5e-110	20.99	1.77e-87
chr9-68	chr9	97477093	97477269	37.91	2.12e-88	93.69	4.63e-147
chr11-72	chr11	90391625	90391801	75.83	1.5e-110	51.95	2.49e-123
chr12-52	chr12	5067724	5067900	37.91	2.12e-88	71.88	2.28e-136
chr12-53	chr12	80010328	80010504	151.66	6.47e-133	51.95	2.49e-123
chr13-58	chr13	51845952	51846128	15.17	7.69e-60	54.66	2.3e-125
chr15-52	chr15	61978979	61979155	37.91	2.12e-88	67.27	1.05e-133
chr17-57	chr17	79364692	79364868	75.83	1.5e-110	34.75	2.68e-107
chr18-40	chr18	77757521	77757697	37.91	2.12e-88	83.28	2.63e-142
chrX-25	chrX	21341818	21341994	37.91	2.12e-88	19.01	1.22e-83
chr1-89	chr1	77442133	77442309	75.02	1.5e-110	27.18	1.42e-96
chr2-109	chr2	116948646	116948822	37.51	2.12e-88	48.51	2.49e-119
chr2-121	chr2	119463972	119464148	150.04	6.47e-133	35.8	2.39e-107
chr2-108	chr2	168334319	168334495	150.04	6.47e-133	73.11	1.28e-135
chr3-68	chr3	142650359	142650535	150.04	6.47e-133	57.68	3.45e-126
chr5-87	chr5	21826410	21826586	75.02	1.5e-110	37.35	5.21e-109
chr5-88	chr5	28176616	28176792	18.76	1.11e-66	59.67	1.56e-127
chr7-55	chr7	19741812	19741988	37.51	2.12e-88	28.37	3.06e-98
chr7-64	chr7	78855140	78855316	75.02	1.5e-110	71.11	1.64e-134
chr9-72	chr9	97816229	97816405	150.04	6.47e-133	75.23	9.3e-137
chr9-70	chr9	104102973	104103149	37.51	2.12e-88	41.86	1.66e-113
chr10-23	chr10	61315540	61315716	150.04	6.47e-133	22.97	4.78e-90
chr13-62	chr13	114406550	114406726	25.01	1.27e-75	22.47	3.35e-89
chr14-59	chr14	12338128	12338304	37.51	2.12e-88	75.23	9.3e-137
chr14-56	chr14	25591073	25591249	75.02	1.5e-110	48.07	5.8e-119
chr14-61	chr14	27000446	27000622	75.02	1.5e-110	78.65	1.57e-138
chr14-54	chr14	28238781	28238957	150.04	6.47e-133	55.82	6.91e-125
chr14-52	chr14	78733789	78733965	37.51	2.12e-88	48.97	1.06e-119
chr14-57	chr14	78770500	78770676	150.04	6.47e-133	52.97	8.25e-123
chr14-58	chr14	122255521	122255697	15	7.69e-60	13.73	1.93e-70
chr17-54	chr17	84758525	84758701	25.01	1.27e-75	68.3	6.57e-133
chr19-45	chr19	32726996	32727172	18.76	1.11e-66	19.23	3.35e-83
chr19-41	chr19	50439741	50439917	75.02	1.5e-110	52.44	2.08e-122
chrX-30	chrX	48072088	48072264	75.02	1.5e-110	77.48	6.25e-138
chr1-80	chr1	64982303	64982479	24.74	3.18e-74	52.4	4.37e-121
chr1-81	chr1	87226499	87226675	37.11	7.94e-87	15.38	6.56e-74
chr1-91	chr1	172323402	172323578	148.43	9.71e-131	61.87	1.31e-127
chr2-122	chr2	136511177	136511353	148.43	9.71e-131	61.87	1.31e-127
chr3-56	chr3	65535456	65535632	74.22	1.13e-108	102.71	1.31e-147
chr3-60	chr3	81034928	81035104	148.43	9.71e-131	36.94	1.95e-107
chr4-77	chr4	91447928	91448104	148.43	9.71e-131	90.09	2.01e-142
chr6-77	chr6	95013313	95013489	148.43	9.71e-131	95.1	1.45e-144
chr6-72	chr6	136113781	136113957	148.43	9.71e-131	69.4	4e-132
chr8-73	chr8	95833563	95833739	14.84	1.16e-58	43.52	8.07e-114
chr8-72	chr8	118285993	118286169	148.43	9.71e-131	57.06	1.99e-124
chr10-25	chr10	63089439	63089615	148.43	9.71e-131	30.03	2.1e-99
chr10-44	chr10	81655373	81655549	37.11	7.94e-87	28.22	5.34e-97
chr10-34	chr10	127120968	127121144	18.55	2.09e-65	35.17	1.58e-105
chr11-90	chr11	96727584	96727760	148.43	9.71e-131	51.35	2.71e-120
chr11-80	chr11	101234191	101234367	148.43	9.71e-131	41.08	1.43e-111
chr12-49	chr12	4557101	4557277	74.22	1.13e-108	50.35	1.61e-119
chr12-54	chr12	118519931	118520107	74.22	1.13e-108	55.22	3.86e-123
chr14-63	chr14	73238481	73238657	74.22	1.13e-108	45.85	7.38e-116
chr14-65	chr14	76515784	76515960	12.37	3.12e-53	34.7	5.33e-105
chr16-30	chr16	22140018	22140194	74.22	1.13e-108	31.5	2.94e-101
chr17-64	chr17	34340736	34340912	148.43	9.71e-131	58.36	2.61e-125
chr17-67	chr17	37027609	37027785	37.11	7.94e-87	40.76	2.93e-111
chr18-48	chr18	55196256	55196432	74.22	1.13e-108	70.35	1.16e-132
chr18-53	chr18	80454572	80454748	37.11	7.94e-87	45.44	1.64e-115
chr19-46	chr19	32255501	32255677	18.55	2.09e-65	33.56	1.04e-103
chr1-95	chr1	88668965	88669141	73.41	8.34e-107	37.91	2.8e-107
chr2-114	chr2	71650223	71650399	24.47	7.85e-73	34.32	1.85e-103
chr3-77	chr3	20023945	20024121	73.41	8.34e-107	33.86	6.06e-103
chr3-64	chr3	34035829	34036005	146.82	1.44e-128	57.07	4.19e-123
chr3-71	chr3	83994514	83994690	73.41	8.34e-107	34.55	1.02e-103
chr3-63	chr3	124606177	124606353	24.47	7.85e-73	95.84	2.57e-143
chr4-82	chr4	13750204	13750380	146.82	1.44e-128	38.48	7.39e-108
chr5-99	chr5	81662010	81662186	146.82	1.44e-128	112.88	1.01e-149
chr5-90	chr5	92498360	92498536	18.35	3.86e-64	35.52	8.86e-105
chr5-86	chr5	148550614	148550790	24.47	7.85e-73	16.28	3.02e-75
chr6-73	chr6	65270837	65271013	146.82	1.44e-128	83.27	8.09e-138
chr7-56	chr7	80130704	80130880	36.7	2.94e-85	26.18	4.07e-93
chr7-62	chr7	136872225	136872401	24.47	7.85e-73	81.93	3.49e-137
chr11-82	chr11	11881833	11882009	73.41	8.34e-107	33.86	6.06e-103
chr11-83	chr11	61004143	61004319	24.47	7.85e-73	40.64	5.88e-110
chr11-79	chr11	96114172	96114348	146.82	1.44e-128	47.03	1.33e-115
chr12-51	chr12	73085926	73086102	73.41	8.34e-107	26.32	2.59e-93
chr13-59	chr13	34109793	34109969	146.82	1.44e-128	34.32	1.85e-103
chr14-64	chr14	10422265	10422441	73.41	8.34e-107	36.81	3.8e-106
chr15-55	chr15	74535859	74536035	36.7	2.94e-85	37.63	5.42e-107
chr16-35	chr16	6965048	6965224	73.41	8.34e-107	55.21	8.11e-122
chr17-53	chr17	27501815	27501991	146.82	1.44e-128	55.82	3.05e-122
chr17-56	chr17	90624925	90625101	73.41	8.34e-107	78.15	2.44e-135
chr18-50	chr18	9215048	9215224	146.82	1.44e-128	23.19	1.61e-88
chr1-84	chr1	153095429	153095605	36.3	1.07e-83	17.32	1.01e-76
chr2-119	chr2	136741494	136741670	145.2	2.1e-126	47.84	5.22e-115
chr2-148	chr2	171879351	171879527	145.2	2.1e-126	53.44	3e-119
chr3-74	chr3	19310354	19310530	145.2	2.1e-126	67.89	1.9e-128
chr3-65	chr3	146379973	146380149	72.6	6.09e-105	86.61	7.59e-138
chr4-80	chr4	43334805	43334981	145.2	2.1e-126	72.81	3.83e-131
chr4-87	chr4	132505868	132506044	145.2	2.1e-126	25.24	9.64e-91
chr8-68	chr8	81893438	81893614	72.6	6.09e-105	55.82	6.42e-121
chr8-85	chr8	90830909	90831085	18.15	7.06e-63	27.15	1.74e-93
chr8-79	chr8	115199296	115199472	72.6	6.09e-105	81.03	2.86e-135
chr10-19	chr10	42968323	42968499	36.3	1.07e-83	22.73	8.19e-87
chr11-78	chr11	97625696	97625872	36.3	1.07e-83	31.6	3.32e-99
chr11-84	chr11	100559500	100559676	36.3	1.07e-83	62.8	1.91e-125
chr12-55	chr12	57099140	57099316	36.3	1.07e-83	67.89	1.9e-128
chr14-69	chr14	122416413	122416589	36.3	1.07e-83	20.18	2.29e-82
chr15-51	chr15	43260161	43260337	145.2	2.1e-126	66.1	2.03e-127
chr15-53	chr15	62959065	62959241	72.6	6.09e-105	39.56	9.63e-108
chr15-54	chr15	65042097	65042273	72.6	6.09e-105	86.61	7.59e-138
chr17-51	chr17	85486990	85487166	145.2	2.1e-126	32.83	1.16e-100
chr18-43	chr18	9533291	9533467	145.2	2.1e-126	106.89	5.51e-146
chr18-47	chr18	23707397	23707573	145.2	2.1e-126	93.03	1.3e-140
chr19-52	chr19	5224723	5224899	24.2	1.91e-71	77.29	1.91e-133
chr19-47	chr19	37877907	37878083	72.6	6.09e-105	9.1	1.41e-53
chrX-34	chrX	58039854	58040030	145.2	2.1e-126	17.69	1.71e-77
chrX-31	chrX	72328955	72329131	145.2	2.1e-126	83.73	1.55e-136
chr1-99	chr1	34074486	34074662	143.59	3.02e-124	15.57	5.05e-72
chr1-98	chr1	63138058	63138234	71.8	4.39e-103	31.24	1.05e-97
chr1-90	chr1	133397692	133397868	143.59	3.02e-124	40.06	4.78e-107
chr1-106	chr1	182181870	182182046	23.93	4.59e-70	72	2.79e-129
chr2-118	chr2	13768120	13768296	35.9	3.86e-82	52.85	1.6e-117
chr3-67	chr3	63842543	63842719	71.8	4.39e-103	59.85	3.01e-122
chr3-69	chr3	133534203	133534379	11.97	5.64e-50	15.43	1.1e-71
chr3-73	chr3	135547419	135547595	17.95	1.27e-61	9.96	4.1e-56
chr5-100	chr5	130186907	130187083	35.9	3.86e-82	69	1.17e-127
chr5-95	chr5	131094848	131095024	143.59	3.02e-124	25.35	6.64e-90
chr5-85	chr5	132526531	132526707	71.8	4.39e-103	48.7	2e-114
chr6-79	chr6	39445875	39446051	17.95	1.27e-61	26.01	7.28e-91
chr8-76	chr8	78537971	78538147	143.59	3.02e-124	29.05	5.5e-95
chr10-22	chr10	59958108	59958284	35.9	3.86e-82	23.21	1.2e-86
chr10-38	chr10	67003155	67003331	71.8	4.39e-103	19.26	9.31e-80
chr10-32	chr10	115469224	115469400	23.93	4.59e-70	34.5	2.02e-101
chr11-85	chr11	119672127	119672303	35.9	3.86e-82	64.52	4.21e-125
chr13-61	chr13	6922494	6922670	143.59	3.02e-124	82.8	1.3e-134
chr13-73	chr13	72345971	72346147	17.95	1.27e-61	46.87	5.7e-113
chr13-67	chr13	95534312	95534488	17.95	1.27e-61	26.71	7.5e-92
chr13-74	chr13	97448230	97448406	71.8	4.39e-103	67.13	1.29e-126
chr14-70	chr14	82972971	82973147	143.59	3.02e-124	70.97	9.87e-129
chr15-58	chr15	39780618	39780794	14.36	3.61e-55	20.36	8.32e-82
chr16-38	chr16	41633987	41634163	143.59	3.02e-124	81.44	5.55e-134
chr18-46	chr18	13712662	13712838	71.8	4.39e-103	58.44	2.42e-121
chr19-48	chr19	7583725	7583901	143.59	3.02e-124	30.86	3.08e-97
chrX-42	chrX	42343735	42343911	143.59	3.02e-124	110.4	1.27e-145
chr1-101	chr1	63442292	63442468	35.49	1.37e-80	63.79	2.72e-123
chr1-83	chr1	80403558	80403734	70.99	3.12e-101	61.4	7.45e-122
chr1-96	chr1	132850933	132851109	14.2	5.13e-54	51.17	5.21e-115
chr2-120	chr2	105397929	105398105	70.99	3.12e-101	32.32	7.06e-98
chr2-123	chr2	137794911	137795087	141.98	4.29e-122	116.95	3.42e-146
chr4-81	chr4	86241969	86242145	35.49	1.37e-80	56.46	1.06e-118
chr4-91	chr4	91304285	91304461	35.49	1.37e-80	51.71	2.11e-115
chr5-94	chr5	76539975	76540151	141.98	4.29e-122	42.34	6.24e-108
chr5-92	chr5	103735879	103736055	35.49	1.37e-80	34.35	3.85e-100
chr5-101	chr5	110099046	110099222	35.49	1.37e-80	50.12	3.09e-114
chr5-96	chr5	133712763	133712939	141.98	4.29e-122	86.18	1.24e-134
chr6-69	chr6	5119271	5119447	23.66	1.09e-68	56.46	1.06e-118
chr6-70	chr6	8119288	8119464	141.98	4.29e-122	54.58	1.98e-117
chr6-83	chr6	37857612	37857788	70.99	3.12e-101	58.48	5.08e-120
chr6-78	chr6	127336848	127337024	70.99	3.12e-101	58.48	5.08e-120
chr6-74	chr6	143152716	143152892	70.99	3.12e-101	31.69	3.74e-97
chr7-60	chr7	6258343	6258519	17.75	2.26e-60	18.54	1.67e-77
chr8-71	chr8	15984320	15984496	35.49	1.37e-80	49.62	7.41e-114
chr8-82	chr8	22416158	22416334	70.99	3.12e-101	67.29	2.67e-125
chr8-74	chr8	86775618	86775794	141.98	4.29e-122	51.17	5.21e-115
chr9-76	chr9	32415059	32415235	141.98	4.29e-122	75.57	1.13e-129
chr9-79	chr9	106171982	106172158	141.98	4.29e-122	30.32	1.61e-95
chr10-30	chr10	44520195	44520371	70.99	3.12e-101	21.17	2.48e-82
chr11-93	chr11	21988527	21988703	141.98	4.29e-122	49.12	1.76e-113
chr11-81	chr11	81280206	81280382	141.98	4.29e-122	72.24	5.66e-128
chr12-58	chr12	53063151	53063327	35.49	1.37e-80	62.18	2.51e-122
chr12-57	chr12	86471013	86471189	141.98	4.29e-122	22.33	2.86e-84
chr12-61	chr12	100636879	100637055	70.99	3.12e-101	64.63	8.76e-124
chr13-63	chr13	44722335	44722511	70.99	3.12e-101	32.53	4.02e-98
chr14-72	chr14	114061468	114061644	141.98	4.29e-122	148.85	2.44e-155
chr14-66	chr14	116882772	116882948	141.98	4.29e-122	80.52	4.52e-132
chr16-43	chr16	9391140	9391316	70.99	3.12e-101	59.9	6.31e-121
chr16-37	chr16	13786044	13786220	141.98	4.29e-122	48.16	9.72e-113
chr16-46	chr16	93807908	93808084	35.49	1.37e-80	79.23	1.86e-131
chr18-56	chr18	4405902	4406078	70.99	3.12e-101	31.49	6.46e-97
chr18-59	chr18	75449786	75449962	23.66	1.09e-68	56.46	1.06e-118
chr19-49	chr19	46529609	46529785	70.99	3.12e-101	43.86	3.06e-109
chrX-33	chrX	12153236	12153412	141.98	4.29e-122	36.66	1.48e-102
chrX-32	chrX	52163844	52164020	141.98	4.29e-122	22.74	6.11e-85
chrX-40	chrX	103287266	103287442	141.98	4.29e-122	79.23	1.86e-131
chr1-97	chr1	10853010	10853186	140.36	4.29e-122	48.08	2.02e-111
chr1-94	chr1	36987888	36988064	70.18	3.12e-101	6.17	4.06e-39
chr1-104	chr1	167448638	167448814	17.55	2.26e-60	86.72	2.34e-133
chr2-115	chr2	96315109	96315285	70.18	3.12e-101	71.41	4.09e-126
chr2-133	chr2	109375024	109375200	70.18	3.12e-101	118.44	5.01e-145
chr3-70	chr3	9654581	9654757	70.18	3.12e-101	43.75	6.25e-108
chr3-76	chr3	104815514	104815690	35.09	1.37e-80	27.91	1.98e-91
chr3-72	chr3	129573719	129573895	35.09	1.37e-80	35.97	1.02e-100
chr3-79	chr3	138041895	138042071	70.18	3.12e-101	80.94	8.8e-131
chr4-90	chr4	12662751	12662927	17.55	2.26e-60	22.38	2.04e-83
chr4-84	chr4	62314667	62314843	70.18	3.12e-101	46.69	2.45e-110
chr5-103	chr5	53671586	53671762	35.09	1.37e-80	38.24	5.77e-103
chr6-93	chr6	65024687	65024863	35.09	1.37e-80	12.98	4.69e-64
chr6-71	chr6	100498905	100499081	23.39	1.09e-68	45.81	1.24e-109
chr7-69	chr7	38028082	38028258	23.39	1.09e-68	28.73	1.71e-92
chr7-63	chr7	138850190	138850366	70.18	3.12e-101	38.24	5.77e-103
chr8-75	chr8	33443659	33443835	23.39	1.09e-68	38.24	5.77e-103
chr8-88	chr8	36550206	36550382	35.09	1.37e-80	16.69	6.73e-73
chr8-80	chr8	124012086	124012262	140.36	4.29e-122	31.74	3.96e-96
chr9-73	chr9	40784092	40784268	140.36	4.29e-122	21.97	9.32e-83
chr9-77	chr9	54098702	54098878	140.36	4.29e-122	67.45	5.51e-124
chr9-81	chr9	88362231	88362407	23.39	1.09e-68	156.65	1.64e-155
chr10-27	chr10	9085468	9085644	70.18	3.12e-101	27.28	1.33e-90
chr10-31	chr10	84859159	84859335	140.36	4.29e-122	21.87	1.36e-82
chr11-92	chr11	4705334	4705510	35.09	1.37e-80	49.05	3.68e-112
chr11-91	chr11	97223681	97223857	70.18	3.12e-101	63.9	5.66e-122
chr13-68	chr13	109775320	109775496	140.36	4.29e-122	12.65	3.9e-63
chr14-74	chr14	117852943	117853119	140.36	4.29e-122	77.08	5.82e-129
chr14-67	chr14	118691444	118691620	35.09	1.37e-80	46.25	5.53e-110
chr16-33	chr16	13722846	13723022	70.18	3.12e-101	74.71	8.52e-128
chr17-61	chr17	29187278	29187454	140.36	4.29e-122	55.18	1.58e-116
chr17-60	chr17	53561632	53561808	23.39	1.09e-68	29.98	4.88e-94
chr17-55	chr17	87973861	87974037	35.09	1.37e-80	45.81	1.24e-109
chr18-58	chr18	63924622	63924798	70.18	3.12e-101	78.33	1.47e-129
chr18-45	chr18	80148572	80148748	140.36	4.29e-122	51.12	1.09e-113
chr19-51	chr19	27904755	27904931	23.39	1.09e-68	42.23	1.27e-106
chrX-36	chrX	20356454	20356630	140.36	4.29e-122	72.48	1.15e-126
chr1-93	chr1	36061154	36061330	34.69	4.81e-79	19.67	6.8e-78
chr1-111	chr1	179723151	179723327	69.37	2.18e-99	82.76	4e-130
chr2-117	chr2	159418541	159418717	69.37	2.18e-99	85.72	2.03e-131
chr2-124	chr2	172544703	172544879	34.69	4.81e-79	39.03	1.51e-102
chr4-95	chr4	62307026	62307202	69.37	2.18e-99	26.09	5.66e-88
chr5-82	chr5	28597069	28597245	69.37	2.18e-99	60.76	9.58e-119
chr5-106	chr5	99959307	99959483	23.12	2.54e-67	42.86	5.81e-106
chr5-89	chr5	126230852	126231028	69.37	2.18e-99	80.01	7.12e-129
chr5-97	chr5	149203777	149203953	23.12	2.54e-67	48.98	7.67e-111
chr5-98	chr5	151044828	151045004	34.69	4.81e-79	104.36	1.08e-138
chr6-91	chr6	100422199	100422375	13.87	7.18e-53	28.92	1.11e-91
chr6-85	chr6	119324873	119325049	69.37	2.18e-99	58.54	2.24e-117
chr6-92	chr6	147076988	147077164	13.87	7.18e-53	72.73	2.32e-125
chr9-75	chr9	108654784	108654960	23.12	2.54e-67	46.16	1.14e-108
chr10-39	chr10	67083843	67084019	34.69	4.81e-79	22.86	3.08e-83
chr11-88	chr11	48697271	48697447	138.75	6e-120	85.72	2.03e-131
chr12-63	chr12	80217165	80217341	34.69	4.81e-79	42.86	5.81e-106
chr13-64	chr13	72817630	72817806	34.69	4.81e-79	72.73	2.32e-125
chr13-78	chr13	114050737	114050913	138.75	6e-120	73.85	6.36e-126
chr15-62	chr15	25762460	25762636	17.34	3.96e-59	23.19	9.44e-84
chr15-57	chr15	38059914	38060090	34.69	4.81e-79	34.79	2.3e-98
chr15-56	chr15	74225395	74225571	17.34	3.96e-59	40	1.9e-103
chr16-45	chr16	32637144	32637320	13.87	7.18e-53	44.86	1.25e-107
chr18-54	chr18	21218582	21218758	138.75	6e-120	47.53	9.73e-110
chrX-45	chrX	71559434	71559610	138.75	6e-120	85.72	2.03e-131
chrX-35	chrX	101639247	101639423	69.37	2.18e-99	25.13	1.24e-86
chr1-100	chr1	60432687	60432863	137.14	8.29e-118	58.57	4.71e-116
chr1-110	chr1	101628576	101628752	68.57	1.51e-97	118.61	8.67e-142
chr1-92	chr1	154081180	154081356	34.28	1.66e-77	26.81	6.18e-88
chr2-155	chr2	20655387	20655563	68.57	1.51e-97	13.91	5.46e-65
chr2-143	chr2	29121088	29121264	17.14	6.83e-58	41.26	2.24e-103
chr2-136	chr2	57828401	57828577	68.57	1.51e-97	93.03	6.62e-133
chr2-146	chr2	104099005	104099181	137.14	8.29e-118	44.34	5.61e-106
chr2-126	chr2	160656340	160656516	137.14	8.29e-118	45.62	5.28e-107
chr3-85	chr3	18256751	18256927	34.28	1.66e-77	84.72	1.74e-129
chr3-75	chr3	84191565	84191741	34.28	1.66e-77	28.93	1.19e-90
chr4-96	chr4	57780906	57781082	137.14	8.29e-118	48.41	3.76e-109
chr4-85	chr4	103466109	103466285	137.14	8.29e-118	50.47	1.17e-110
chr6-89	chr6	12835122	12835298	137.14	8.29e-118	59.31	1.67e-116
chr6-86	chr6	40333628	40333804	137.14	8.29e-118	48.41	3.76e-109
chr6-80	chr6	65021820	65021996	17.14	6.83e-58	12.1	3.09e-60
chr6-76	chr6	67230309	67230485	137.14	8.29e-118	49.94	2.82e-110
chr7-65	chr7	49347318	49347494	68.57	1.51e-97	15.92	1.24e-69
chr7-66	chr7	95688329	95688505	68.57	1.51e-97	89.52	1.68e-131
chr8-81	chr8	12431715	12431891	137.14	8.29e-118	30.61	1.15e-92
chr8-86	chr8	27903933	27904109	68.57	1.51e-97	53.92	4.77e-113
chr8-84	chr8	40963093	40963269	137.14	8.29e-118	46.06	2.36e-107
chr8-77	chr8	79176121	79176297	68.57	1.51e-97	55.17	7e-114
chr9-84	chr9	49024663	49024839	68.57	1.51e-97	27.43	9.51e-89
chr9-78	chr9	77616970	77617146	22.86	5.84e-66	55.17	7e-114
chr10-28	chr10	88349856	88350032	68.57	1.51e-97	33.18	1.51e-95
chr11-94	chr11	54971807	54971983	137.14	8.29e-118	41.62	1.08e-103
chr11-96	chr11	79752536	79752712	34.28	1.66e-77	44.76	2.57e-106
chr11-107	chr11	101682104	101682280	34.28	1.66e-77	43.53	2.61e-105
chr12-56	chr12	72854418	72854594	137.14	8.29e-118	25.79	1.48e-86
chr13-65	chr13	111541264	111541440	68.57	1.51e-97	56.48	9.82e-115
chr14-68	chr14	122256430	122256606	68.57	1.51e-97	12.29	9.27e-61
chr15-61	chr15	11584261	11584437	68.57	1.51e-97	76.52	8.93e-126
chr16-34	chr16	9284514	9284690	137.14	8.29e-118	47.92	8.75e-109
chr16-44	chr16	24443401	24443577	22.86	5.84e-66	60.06	5.82e-117
chr16-47	chr16	30939976	30940152	22.86	5.84e-66	48.41	3.76e-109
chr16-57	chr16	40616746	40616922	137.14	8.29e-118	77.78	2.28e-126
chr17-62	chr17	70751081	70751257	137.14	8.29e-118	16.19	3.2e-70
chr18-51	chr18	38384308	38384484	68.57	1.51e-97	22.17	3.27e-81
chr19-55	chr19	3842615	3842791	22.86	5.84e-66	25.65	2.3e-86
chr19-59	chr19	46988539	46988715	137.14	8.29e-118	48.41	3.76e-109
chr1-103	chr1	95030696	95030872	67.76	1.02e-95	64.23	5.11e-118
chr2-125	chr2	4412956	4413132	67.76	1.02e-95	59.35	3.5e-115
chr2-135	chr2	43732529	43732705	135.52	1.13e-115	86.83	7.1e-129
chr2-137	chr2	45104646	45104822	135.52	1.13e-115	72.13	3.43e-122
chr2-139	chr2	51038816	51038992	22.59	1.32e-64	66.04	5.13e-119
chr2-132	chr2	77019263	77019439	22.59	1.32e-64	80.84	2.71e-126
chr3-81	chr3	86692878	86693054	67.76	1.02e-95	83.73	1.47e-127
chr3-84	chr3	152735956	152736132	67.76	1.02e-95	58.61	9.88e-115
chr4-88	chr4	5805074	5805250	67.76	1.02e-95	66.04	5.13e-119
chr5-122	chr5	24214589	24214765	33.88	5.64e-76	111.64	5.98e-138
chr5-104	chr5	81556191	81556367	67.76	1.02e-95	99.76	6.93e-134
chr5-102	chr5	132477643	132477819	135.52	1.13e-115	55.82	5.55e-113
chr6-75	chr6	7694347	7694523	135.52	1.13e-115	27.91	2.43e-88
chr6-90	chr6	97102458	97102634	33.88	5.64e-76	29.12	7.69e-90
chr6-84	chr6	148918921	148919097	135.52	1.13e-115	69.98	4.22e-121
chr7-78	chr7	127225294	127225470	33.88	5.64e-76	22.33	1.59e-80
chr8-78	chr8	65064192	65064368	13.55	1.35e-50	32.56	8.83e-94
chr8-92	chr8	117136472	117136648	22.59	1.32e-64	55.16	1.47e-112
chr10-36	chr10	41467256	41467432	33.88	5.64e-76	26.19	4.11e-86
chr10-20	chr10	80051041	80051217	135.52	1.13e-115	12.37	2.78e-60
chr10-29	chr10	95642992	95643168	135.52	1.13e-115	36.35	1.12e-97
chr10-40	chr10	118461050	118461226	135.52	1.13e-115	23.68	1.41e-82
chr11-118	chr11	4803195	4803371	67.76	1.02e-95	23.21	7.03e-82
chr11-100	chr11	60100929	60101105	33.88	5.64e-76	64.23	5.11e-118
chr11-101	chr11	77680153	77680329	67.76	1.02e-95	55.82	5.55e-113
chr11-89	chr11	96374942	96375118	16.94	1.16e-56	72.13	3.43e-122
chr11-106	chr11	100376079	100376255	67.76	1.02e-95	61.69	1.43e-116
chr11-97	chr11	103809290	103809466	67.76	1.02e-95	63.36	1.57e-117
chr11-95	chr11	117975526	117975702	33.88	5.64e-76	16.75	1.44e-70
chr12-60	chr12	12987546	12987722	135.52	1.13e-115	27.74	3.92e-88
chr12-66	chr12	39094818	39094994	33.88	5.64e-76	97.68	3.99e-133
chr13-66	chr13	46943467	46943643	135.52	1.13e-115	51.52	4.08e-110
chr15-66	chr15	77338650	77338826	67.76	1.02e-95	32.79	5e-94
chr16-40	chr16	33760677	33760853	33.88	5.64e-76	75.62	6.83e-124
chr16-39	chr16	97322822	97322998	67.76	1.02e-95	33.02	2.83e-94
chr17-58	chr17	9202588	9202764	33.88	5.64e-76	71.04	1.22e-121
chrX-37	chrX	103986349	103986525	67.76	1.02e-95	17.3	1.09e-71
chr1-105	chr1	182031257	182031433	22.32	2.96e-63	13.39	3.21e-62
chr2-129	chr2	9445975	9446151	66.95	6.86e-94	38.29	2.3e-98
chr2-128	chr2	170838265	170838441	33.48	1.89e-74	57.91	5.79e-113
chr3-87	chr3	40456146	40456322	66.95	6.86e-94	98.57	6.92e-132
chr3-88	chr3	67514524	67514700	33.48	1.89e-74	69.15	2.96e-119
chr5-113	chr5	105750549	105750725	66.95	6.86e-94	71.28	2.48e-120
chr5-119	chr5	135794417	135794593	66.95	6.86e-94	54.5	8.13e-111
chr5-114	chr5	139325866	139326042	133.91	1.51e-113	41.37	4.42e-101
chr6-95	chr6	99615513	99615689	66.95	6.86e-94	40.64	1.85e-100
chr8-100	chr8	15843248	15843424	22.32	2.96e-63	41.74	2.14e-101
chr8-87	chr8	106963377	106963553	16.74	1.95e-55	32.4	1.64e-92
chr9-85	chr9	78359915	78360091	133.91	1.51e-113	12.62	2.94e-60
chr10-42	chr10	84839090	84839266	66.95	6.86e-94	21.35	4.78e-78
chr10-33	chr10	84910889	84911065	133.91	1.51e-113	18.91	6.91e-74
chr10-45	chr10	117152472	117152648	33.48	1.89e-74	26.47	1.77e-85
chr11-125	chr11	102329638	102329814	133.91	1.51e-113	23.52	2.23e-81
chr12-71	chr12	4358745	4358921	133.91	1.51e-113	27.91	2.6e-87
chr12-59	chr12	54225181	54225357	133.91	1.51e-113	30.08	6.34e-90
chr14-73	chr14	122258349	122258525	133.91	1.51e-113	10.6	1.67e-54
chr15-63	chr15	34824577	34824753	133.91	1.51e-113	68.13	9.93e-119
chr15-69	chr15	38153947	38154123	33.48	1.89e-74	39.94	7.58e-100
chr15-67	chr15	93472149	93472325	66.95	6.86e-94	84.23	2.78e-126
chr17-69	chr17	82273004	82273180	33.48	1.89e-74	55.15	3.1e-111
chr18-55	chr18	24868755	24868931	33.48	1.89e-74	35.37	1.41e-95
chr18-57	chr18	34555343	34555519	66.95	6.86e-94	37.36	1.67e-97
chr18-67	chr18	67341488	67341664	33.48	1.89e-74	26.17	4.39e-85
chrX-39	chrX	52753796	52753972	133.91	1.51e-113	32.86	5.28e-93
chr1-116	chr1	7732865	7733041	66.15	6.86e-94	55.15	6.51e-110
chr1-113	chr1	52009153	52009329	33.07	1.89e-74	52.61	2.88e-108
chr1-109	chr1	84860833	84861009	66.15	6.86e-94	40.51	3.73e-99
chr1-126	chr1	134775153	134775329	132.3	1.51e-113	75.03	1.04e-120
chr2-150	chr2	20486245	20486421	132.3	1.51e-113	53.22	1.14e-108
chr2-130	chr2	36222247	36222423	132.3	1.51e-113	60.22	5.37e-113
chr2-131	chr2	59633969	59634145	66.15	6.86e-94	52.01	7.22e-108
chr2-141	chr2	167072357	167072533	16.54	1.95e-55	42.38	9.96e-101
chr3-78	chr3	51590490	51590666	22.05	2.96e-63	63.57	6.84e-115
chr3-83	chr3	101163635	101163811	132.3	1.51e-113	26.77	7.57e-85
chr4-98	chr4	45771299	45771475	132.3	1.51e-113	23.59	1.57e-80
chr4-94	chr4	53339185	53339361	33.07	1.89e-74	26.01	7.36e-84
chr4-100	chr4	153113687	153113863	132.3	1.51e-113	69.35	6.06e-118
chr4-93	chr4	156034295	156034471	132.3	1.51e-113	50.86	4.4e-107
chr5-130	chr5	18688627	18688803	13.23	1.81e-49	58.68	4.36e-112
chr5-121	chr5	26887353	26887529	66.15	6.86e-94	71.52	5.04e-119
chr5-123	chr5	92667874	92668050	66.15	6.86e-94	78.92	1.75e-122
chr5-117	chr5	97203811	97203987	16.54	1.95e-55	50.3	1.07e-106
chr5-109	chr5	142130073	142130249	22.05	2.96e-63	44.01	4.84e-102
chr7-77	chr7	83401072	83401248	33.07	1.89e-74	65.39	7.04e-116
chr7-71	chr7	139140065	139140241	132.3	1.51e-113	56.51	9.13e-111
chr8-97	chr8	46214075	46214251	132.3	1.51e-113	51.43	1.79e-107
chr8-105	chr8	68420532	68420708	22.05	2.96e-63	43.59	1.04e-101
chr8-94	chr8	87629739	87629915	132.3	1.51e-113	53.22	1.14e-108
chr8-91	chr8	105432200	105432376	66.15	6.86e-94	34.67	9.12e-94
chr9-87	chr9	49024057	49024233	66.15	6.86e-94	26.61	1.2e-84
chr9-86	chr9	118266402	118266578	22.05	2.96e-63	89.75	5.14e-127
chr11-98	chr11	14159461	14159637	66.15	6.86e-94	95.36	3.76e-129
chr11-105	chr11	72420565	72420741	66.15	6.86e-94	49.22	6.14e-106
chr12-65	chr12	27065116	27065292	11.02	1.14e-44	70.42	1.76e-118
chr13-70	chr13	11979089	11979265	33.07	1.89e-74	70.42	1.76e-118
chr13-72	chr13	43837864	43838040	66.15	6.86e-94	93.41	2.01e-128
chr13-69	chr13	84752358	84752534	132.3	1.51e-113	88.02	2.48e-126
chr14-71	chr14	22005054	22005230	132.3	1.51e-113	89.75	5.14e-127
chr14-79	chr14	89325200	89325376	132.3	1.51e-113	49.22	6.14e-106
chr15-59	chr15	6664152	6664328	66.15	6.86e-94	50.3	1.07e-106
chr15-70	chr15	57824399	57824575	13.23	1.81e-49	52.61	2.88e-108
chr16-52	chr16	42782083	42782259	66.15	6.86e-94	21.29	4.96e-77
chr16-41	chr16	48303683	48303859	22.05	2.96e-63	37.52	1.7e-96
chr16-49	chr16	82602155	82602331	132.3	1.51e-113	111.64	1.04e-134
chr17-63	chr17	14301641	14301817	66.15	6.86e-94	40.15	7.54e-99
chr18-65	chr18	38573831	38574007	132.3	1.51e-113	15.95	2.68e-67
chr18-71	chr18	60587048	60587224	33.07	1.89e-74	89.75	5.14e-127
chr18-62	chr18	75210402	75210578	66.15	6.86e-94	29.53	3.19e-88
chr18-60	chr18	75556312	75556488	33.07	1.89e-74	56.51	9.13e-111
chr19-53	chr19	21894857	21895033	66.15	6.86e-94	52.01	7.22e-108
chr19-57	chr19	32261150	32261326	66.15	6.86e-94	34.41	1.66e-93
chr19-56	chr19	44266102	44266278	11.02	1.14e-44	25.01	1.59e-82
chrX-41	chrX	8008615	8008791	132.3	1.51e-113	32.46	1.74e-91
chrX-38	chrX	17404402	17404578	132.3	1.51e-113	95.36	3.76e-129
chr1-114	chr1	6282410	6282586	32.67	6.24e-73	90.43	9.45e-126
chr1-108	chr1	35697955	35698131	32.67	6.24e-73	40.01	1.51e-97
chr1-117	chr1	36013749	36013925	16.34	3.22e-54	21.95	3.88e-77
chr1-102	chr1	75804595	75804771	21.78	6.51e-62	70.64	3.6e-117
chr2-142	chr2	22045111	22045287	65.34	4.53e-92	65.53	1.46e-114
chr3-82	chr3	39313673	39313849	21.78	6.51e-62	88.65	4.62e-125
chr3-89	chr3	122017963	122018139	32.67	6.24e-73	53.19	2.39e-107
chr5-110	chr5	6517442	6517618	130.68	1.99e-111	113.03	1.6e-133
chr5-111	chr5	52644439	52644615	130.68	1.99e-111	52.57	6.05e-107
chr5-116	chr5	55792044	55792220	65.34	4.53e-92	21.13	7.37e-76
chr6-81	chr6	82181314	82181490	65.34	4.53e-92	107.65	8.02e-132
chr6-98	chr6	134961349	134961525	65.34	4.53e-92	41.86	4.22e-99
chr6-99	chr6	145076461	145076637	21.78	6.51e-62	50.8	9.22e-106
chr7-76	chr7	107339636	107339812	65.34	4.53e-92	50.8	9.22e-106
chr8-83	chr8	25934447	25934623	21.78	6.51e-62	44.77	2.1e-101
chr8-89	chr8	64632351	64632527	65.34	4.53e-92	17.32	3.09e-69
chr8-90	chr8	105233540	105233716	32.67	6.24e-73	26.44	2.03e-83
chr8-101	chr8	111765860	111766036	130.68	1.99e-111	28.62	4.22e-86
chr9-99	chr9	9028107	9028283	65.34	4.53e-92	42.25	2.02e-99
chr9-82	chr9	15119663	15119839	65.34	4.53e-92	83.73	4.48e-123
chr9-83	chr9	34382304	34382480	65.34	4.53e-92	72.92	2.85e-118
chr9-89	chr9	67482291	67482467	65.34	4.53e-92	57.97	2.56e-110
chr10-46	chr10	71310473	71310649	32.67	6.24e-73	37.37	3.34e-95
chr11-108	chr11	17722199	17722375	130.68	1.99e-111	82.2	1.95e-122
chr11-117	chr11	46041990	46042166	32.67	6.24e-73	53.19	2.39e-107
chr11-102	chr11	80137901	80138077	21.78	6.51e-62	20.93	1.51e-75
chr11-130	chr11	106722616	106722792	32.67	6.24e-73	25.4	4.62e-82
chr12-62	chr12	13067431	13067607	130.68	1.99e-111	85.31	1e-123
chr12-64	chr12	43204611	43204787	65.34	4.53e-92	55.14	1.37e-108
chr15-80	chr15	59294655	59294831	130.68	1.99e-111	45.67	4.3e-102
chr15-60	chr15	84282244	84282420	130.68	1.99e-111	55.14	1.37e-108
chr16-48	chr16	73096767	73096943	130.68	1.99e-111	38.64	2.35e-96
chr16-50	chr16	90902946	90903122	32.67	6.24e-73	51.97	1.52e-106
chr17-66	chr17	6763638	6763814	21.78	6.51e-62	23.8	7.36e-80
chr17-68	chr17	29080971	29081147	9.33	1.06e-39	55.82	5.16e-109
chr18-66	chr18	53265291	53265467	32.67	6.24e-73	44.33	4.58e-101
chr19-58	chr19	57577028	57577204	32.67	6.24e-73	60.28	1.13e-111
chr1-125	chr1	59697850	59698026	32.27	2.03e-71	62.02	2.73e-111
chr2-154	chr2	5584693	5584869	32.27	2.03e-71	62.02	2.73e-111
chr2-138	chr2	49449154	49449330	64.53	2.94e-90	40.97	3.63e-97
chr2-162	chr2	109936406	109936582	129.07	2.59e-109	76.99	1.08e-118
chr2-147	chr2	146672921	146673097	129.07	2.59e-109	50.17	4.68e-104
chr2-134	chr2	157840826	157841002	32.27	2.03e-71	31.23	5.39e-88
chr2-157	chr2	167058910	167059086	64.53	2.94e-90	46.52	1.77e-101
chr3-91	chr3	66687242	66687418	64.53	2.94e-90	101.49	3.44e-128
chr4-99	chr4	73517666	73517842	32.27	2.03e-71	31.9	1.04e-88
chr5-118	chr5	126623230	126623406	64.53	2.94e-90	60.34	2.36e-110
chr5-108	chr5	135129848	135130024	129.07	2.59e-109	40.23	1.5e-96
chr6-94	chr6	119418946	119419122	21.51	1.41e-60	32.83	1.1e-89
chr7-72	chr7	34798844	34799020	129.07	2.59e-109	29.38	6.07e-86
chr7-70	chr7	41582159	41582335	64.53	2.94e-90	50.74	1.93e-104
chr7-74	chr7	134697554	134697730	64.53	2.94e-90	34.89	9.92e-92
chr8-93	chr8	74980400	74980576	21.51	1.41e-60	48.54	6.3e-103
chr8-112	chr8	104093449	104093625	16.13	5.23e-53	76.99	1.08e-118
chr9-93	chr9	96603503	96603679	32.27	2.03e-71	108.91	1.28e-130
chr9-94	chr9	113458667	113458843	129.07	2.59e-109	29.19	1.01e-85
chr9-88	chr9	118537655	118537831	32.27	2.03e-71	19.17	1e-71
chr10-35	chr10	4249292	4249468	21.51	1.41e-60	23.5	1.75e-78
chr10-41	chr10	52274100	52274276	21.51	1.41e-60	16.12	4.72e-66
chr11-138	chr11	4464483	4464659	64.53	2.94e-90	41.73	8.55e-98
chr11-109	chr11	46115161	46115337	129.07	2.59e-109	36.9	1.25e-93
chr11-110	chr11	76262783	76262959	129.07	2.59e-109	47	7.78e-102
chr11-103	chr11	88202071	88202247	32.27	2.03e-71	34.62	1.82e-91
chr13-71	chr13	34248962	34249138	129.07	2.59e-109	10.92	1.58e-53
chr13-75	chr13	40523130	40523306	129.07	2.59e-109	62.89	9.09e-112
chr13-80	chr13	63968772	63968948	129.07	2.59e-109	69.77	2.55e-115
chr13-93	chr13	86345344	86345520	32.27	2.03e-71	70.88	7.35e-116
chr14-85	chr14	9319155	9319331	129.07	2.59e-109	47	7.78e-102
chr15-78	chr15	38313112	38313288	129.07	2.59e-109	78.34	2.72e-119
chr15-77	chr15	103305236	103305412	32.27	2.03e-71	56.52	4.04e-108
chr16-42	chr16	90437392	90437568	16.13	5.23e-53	28.26	1.21e-84
chr19-54	chr19	32723830	32724006	64.53	2.94e-90	16.01	8.1e-66
chr19-64	chr19	61320987	61321163	129.07	2.59e-109	135.32	4.24e-138
chrX-49	chrX	8002120	8002296	32.27	2.03e-71	40.6	7.4e-97
chrX-43	chrX	48596162	48596338	129.07	2.59e-109	117.51	3.09e-133
chrX-46	chrX	144319412	144319588	64.53	2.94e-90	78.34	2.72e-119
chr1-112	chr1	51429862	51430038	31.86	6.5e-70	59.59	1.43e-108
chr1-120	chr1	160209912	160210088	21.24	3.02e-59	53.78	4.12e-105
chr2-149	chr2	10353983	10354159	63.73	1.88e-88	62.99	1.9e-110
chr2-144	chr2	79566719	79566895	63.73	1.88e-88	43.66	4.15e-98
chr2-151	chr2	81848912	81849088	127.46	3.32e-107	33.41	3.67e-89
chr2-153	chr2	115723540	115723716	31.86	6.5e-70	29.59	3.89e-85
chr3-80	chr3	83980632	83980808	63.73	1.88e-88	28.45	7.92e-84
chr3-94	chr3	148986401	148986577	21.24	3.02e-59	51.27	1.65e-103
chr4-92	chr4	124035792	124035968	63.73	1.88e-88	46.91	1.61e-100
chr5-126	chr5	36876838	36877014	63.73	1.88e-88	78.74	5.37e-118
chr6-82	chr6	37729349	37729525	63.73	1.88e-88	60.41	4.95e-109
chr6-101	chr6	42380889	42381065	31.86	6.5e-70	61.24	1.7e-109
chr8-99	chr8	92028479	92028655	31.86	6.5e-70	26.09	5.73e-81
chr8-102	chr8	125665941	125666117	63.73	1.88e-88	39.37	1.2e-94
chr9-101	chr9	75565051	75565227	15.93	8.38e-52	61.24	1.7e-109
chr10-48	chr10	117848977	117849153	127.46	3.32e-107	22.97	9.1e-77
chr11-113	chr11	3293138	3293314	127.46	3.32e-107	29.79	2.33e-85
chr11-116	chr11	30242836	30243012	127.46	3.32e-107	81.66	3.1e-119
chr11-104	chr11	62873154	62873330	63.73	1.88e-88	41.21	3.57e-96
chr11-129	chr11	67011704	67011880	12.75	4e-46	50.11	9.8e-103
chr11-111	chr11	100271710	100271886	31.86	6.5e-70	40.46	1.49e-95
chr11-112	chr11	117585672	117585848	63.73	1.88e-88	49	5.58e-102
chr12-68	chr12	73719912	73720088	12.75	4e-46	49	5.58e-102
chr12-69	chr12	76458519	76458695	21.24	3.02e-59	66.81	1.95e-112
chr13-86	chr13	43300497	43300673	63.73	1.88e-88	44.1	1.93e-98
chr13-76	chr13	71507854	71508030	31.86	6.5e-70	31.95	1.11e-87
chr14-94	chr14	21474672	21474848	31.86	6.5e-70	45.46	1.83e-99
chr14-82	chr14	77814170	77814346	63.73	1.88e-88	53.13	1.05e-104
chr15-73	chr15	7281446	7281622	127.46	3.32e-107	93.82	6.07e-124
chr15-65	chr15	41882649	41882825	21.24	3.02e-59	32.91	1.16e-88
chr16-56	chr16	22160508	22160684	127.46	3.32e-107	44.1	1.93e-98
chr19-60	chr19	37921204	37921380	63.73	1.88e-88	50.69	4.04e-103
chr1-122	chr1	30805069	30805245	125.84	4.18e-105	70.22	1.07e-112
chr1-132	chr1	136566413	136566589	15.73	1.32e-50	21.55	9.2e-74
chr1-133	chr1	136570405	136570581	62.92	1.19e-86	21.55	9.2e-74
chr2-140	chr2	71243201	71243377	62.92	1.19e-86	50.63	8.47e-102
chr2-161	chr2	84838322	84838498	15.73	1.32e-50	22.91	9.57e-76
chr3-97	chr3	34668556	34668732	15.73	1.32e-50	19.26	3.82e-70
chr3-92	chr3	89956288	89956464	31.46	2.05e-68	68.03	1.22e-111
chr4-101	chr4	138693106	138693282	125.84	4.18e-105	20.34	6.7e-72
chr5-112	chr5	87931751	87931927	125.84	4.18e-105	77.75	4.23e-116
chr5-120	chr5	96000347	96000523	62.92	1.19e-86	37.53	6.83e-92
chr5-131	chr5	97226516	97226692	31.46	2.05e-68	30.88	1.79e-85
chr5-107	chr5	122294409	122294585	125.84	4.18e-105	35.11	1.08e-89
chr5-124	chr5	147749943	147750119	125.84	4.18e-105	43.54	8.5e-97
chr6-87	chr6	65597090	65597266	62.92	1.19e-86	48.38	2.74e-100
chr6-103	chr6	112949428	112949604	31.46	2.05e-68	13.56	5.5e-59
chr6-117	chr6	145061481	145061657	31.46	2.05e-68	60.47	1.04e-107
chr7-73	chr7	68909762	68909938	125.84	4.18e-105	48.38	2.74e-100
chr7-68	chr7	100288049	100288225	31.46	2.05e-68	45.83	1.7e-98
chr7-67	chr7	133437908	133438084	62.92	1.19e-86	36.9	2.5e-91
chr8-96	chr8	10666181	10666357	62.92	1.19e-86	23.04	6.46e-76
chr8-104	chr8	11640700	11640876	62.92	1.19e-86	32.49	3.82e-87
chr8-95	chr8	89015800	89015976	62.92	1.19e-86	28.64	5.17e-83
chr8-116	chr8	120334970	120335146	20.97	6.34e-58	25.76	1.5e-79
chr8-103	chr8	127343199	127343375	125.84	4.18e-105	42.68	3.84e-96
chr9-96	chr9	32450153	32450329	62.92	1.19e-86	53.75	8.65e-104
chr9-91	chr9	113192909	113193085	62.92	1.19e-86	73.79	2.35e-114
chr10-43	chr10	3892055	3892231	20.97	6.34e-58	32.74	2.17e-87
chr10-49	chr10	128538409	128538585	15.73	1.32e-50	37.86	3.54e-92
chr11-114	chr11	4302295	4302471	31.46	2.05e-68	44.88	8.33e-98
chr11-122	chr11	44746863	44747039	31.46	2.05e-68	36.9	2.5e-91
chr11-148	chr11	55820587	55820763	62.92	1.19e-86	55.11	1.28e-104
chr11-123	chr11	80518614	80518790	62.92	1.19e-86	57.29	6.56e-106
chr12-70	chr12	84211183	84211359	31.46	2.05e-68	35.11	1.08e-89
chr13-81	chr13	97454802	97454978	31.46	2.05e-68	55.82	4.81e-105
chr14-77	chr14	94895469	94895645	125.84	4.18e-105	114.57	4.22e-129
chr15-79	chr15	25754672	25754848	62.92	1.19e-86	15.72	1.21e-63
chr16-53	chr16	8724057	8724233	20.97	6.34e-58	38.87	4.75e-93
chr17-72	chr17	29467555	29467731	12.58	5.04e-45	36.9	2.5e-91
chr17-70	chr17	85149339	85149515	31.46	2.05e-68	49.48	4.91e-101
chr18-63	chr18	16180026	16180202	62.92	1.19e-86	92.63	5.69e-122
chr18-64	chr18	27726590	27726766	31.46	2.05e-68	52.46	5.6e-103
chr18-69	chr18	61236178	61236354	31.46	2.05e-68	64.98	4.14e-110
chr18-73	chr18	78363625	78363801	62.92	1.19e-86	61.32	3.55e-108
chrX-47	chrX	79316917	79317093	125.84	4.18e-105	103.66	9.64e-126
chr1-107	chr1	12692043	12692219	62.11	1.19e-86	28.85	3.37e-82
chr1-129	chr1	35750310	35750486	62.11	1.19e-86	61.4	7.44e-107
chr1-119	chr1	38823981	38824157	31.06	2.05e-68	37.05	2.56e-90
chr1-123	chr1	78168041	78168217	62.11	1.19e-86	38.38	1.85e-91
chr1-143	chr1	119305214	119305390	62.11	1.19e-86	16.22	7.79e-64
chr2-156	chr2	154423559	154423735	62.11	1.19e-86	11.58	2.14e-53
chr3-90	chr3	32759333	32759509	124.23	4.18e-105	8.88	2.26e-45
chr3-101	chr3	36311479	36311655	124.23	4.18e-105	65.12	8.6e-109
chr3-103	chr3	87974444	87974620	15.53	1.32e-50	36.42	9.23e-90
chr3-93	chr3	101632985	101633161	20.7	6.34e-58	38.04	3.59e-91
chr3-98	chr3	112239733	112239909	124.23	4.18e-105	62.29	2.5e-107
chr3-86	chr3	153675943	153676119	62.11	1.19e-86	53.06	4.65e-102
chr3-95	chr3	157321933	157322109	62.11	1.19e-86	8.72	7.98e-45
chr4-97	chr4	11389451	11389627	62.11	1.19e-86	36.74	4.88e-90
chr4-107	chr4	57765957	57766133	62.11	1.19e-86	13.27	1.45e-57
chr4-115	chr4	127201145	127201321	124.23	4.18e-105	20.27	6.86e-71
chr4-106	chr4	138411085	138411261	15.53	1.32e-50	72.85	1.73e-112
chr5-143	chr5	66428213	66428389	124.23	4.18e-105	93.43	1.03e-120
chr5-105	chr5	85174019	85174195	31.06	2.05e-68	102.33	9.99e-124
chr6-102	chr6	53801327	53801503	124.23	4.18e-105	38.38	1.85e-91
chr6-97	chr6	133963382	133963558	20.7	6.34e-58	54.41	7.03e-103
chr6-88	chr6	146981376	146981552	124.23	4.18e-105	64.15	2.69e-108
chr8-117	chr8	3421608	3421784	15.53	1.32e-50	30.27	9.38e-84
chr8-98	chr8	64366925	64367101	62.11	1.19e-86	26.53	1.68e-79
chr8-110	chr8	106507774	106507950	10.35	1.53e-40	32.56	4.04e-86
chr9-111	chr9	110206115	110206291	124.23	4.18e-105	70.46	2.18e-111
chr10-47	chr10	66920403	66920579	12.42	5.04e-45	9.62	9.53e-48
chr11-133	chr11	30491997	30492173	124.23	4.18e-105	39.43	2.41e-92
chr12-67	chr12	76965198	76965374	31.06	2.05e-68	43.86	8.09e-96
chr13-85	chr13	41458816	41458992	31.06	2.05e-68	46.72	6.94e-98
chr13-79	chr13	52044017	52044193	124.23	4.18e-105	138.65	8.51e-134
chr13-77	chr13	52562305	52562481	62.11	1.19e-86	44.31	3.74e-96
chr13-92	chr13	56222064	56222240	62.11	1.19e-86	40.55	2.96e-93
chr13-83	chr13	57603248	57603424	31.06	2.05e-68	61.4	7.44e-107
chr14-75	chr14	23397736	23397912	15.53	1.32e-50	46.22	1.57e-97
chr14-78	chr14	116927521	116927697	20.7	6.34e-58	55.82	1.01e-103
chr15-71	chr15	12424403	12424579	15.53	1.32e-50	38.72	9.41e-92
chr15-64	chr15	62010842	62011018	124.23	4.18e-105	8.36	1.37e-43
chr16-54	chr16	42306020	42306196	62.11	1.19e-86	34.66	3.78e-88
chr17-65	chr17	47571726	47571902	15.53	1.32e-50	39.8	1.2e-92
chr18-61	chr18	4404153	4404329	62.11	1.19e-86	25.89	1.02e-78
chrX-44	chrX	52632873	52633049	62.11	1.19e-86	46.72	6.94e-98
chr1-173	chr1	3062888	3063064	122.62	5.18e-103	141.41	9.94e-133
chr1-118	chr1	36962930	36963106	61.31	7.37e-85	47.66	2.75e-97
chr1-115	chr1	90528109	90528285	61.31	7.37e-85	38.92	9.49e-91
chr1-121	chr1	186510653	186510829	20.44	1.31e-56	21.64	4.75e-72
chr2-166	chr2	3669738	3669914	20.44	1.31e-56	103.47	1.67e-122
chr2-169	chr2	5759607	5759783	122.62	5.18e-103	64.28	5.6e-107
chr2-158	chr2	18686919	18687095	122.62	5.18e-103	69.54	1.54e-109
chr2-171	chr2	30335402	30335578	122.62	5.18e-103	53.03	9.78e-101
chr2-172	chr2	120514233	120514409	122.62	5.18e-103	47.14	6.32e-97
chr2-186	chr2	132044763	132044939	122.62	5.18e-103	61.48	1.56e-105
chr2-174	chr2	152737465	152737641	15.33	2.05e-49	29.67	4.76e-82
chr4-104	chr4	12425541	12425717	122.62	5.18e-103	45.13	1.61e-95
chr4-102	chr4	13218860	13219036	61.31	7.37e-85	41.19	1.43e-92
chr4-111	chr4	13565872	13566048	30.65	6.35e-67	44.65	3.53e-95
chr5-115	chr5	3386770	3386946	61.31	7.37e-85	54.39	1.48e-101
chr5-133	chr5	21651924	21652100	30.65	6.35e-67	45.61	7.25e-96
chr5-132	chr5	25533369	25533545	15.33	2.05e-49	25.87	1.09e-77
chr5-137	chr5	97839464	97839640	20.44	1.31e-56	75.75	2.52e-112
chr5-128	chr5	122191598	122191774	20.44	1.31e-56	44.19	7.68e-95
chr6-105	chr6	32706542	32706718	30.65	6.35e-67	47.14	6.32e-97
chr6-96	chr6	92246413	92246589	20.44	1.31e-56	9.93	4.03e-48
chr6-106	chr6	122702512	122702688	20.44	1.31e-56	24.1	1.89e-75
chr7-88	chr7	79654744	79654920	30.65	6.35e-67	26.68	1.14e-78
chr7-75	chr7	139945607	139945783	30.65	6.35e-67	7.89	2.41e-41
chr8-107	chr8	8872051	8872227	10.22	1.59e-39	73.14	3.51e-111
chr8-111	chr8	22901119	22901295	20.44	1.31e-56	52.37	2.47e-100
chr8-108	chr8	47544111	47544287	61.31	7.37e-85	74.42	9.52e-112
chr8-109	chr8	48179144	48179320	61.31	7.37e-85	37.21	2.62e-89
chr8-119	chr8	78584156	78584332	61.31	7.37e-85	54.39	1.48e-101
chr8-106	chr8	111648857	111649033	61.31	7.37e-85	21.11	2.95e-71
chr11-140	chr11	19985441	19985617	20.44	1.31e-56	20.59	1.75e-70
chr11-134	chr11	46020350	46020526	122.62	5.18e-103	36.26	1.79e-88
chr11-128	chr11	46056763	46056939	30.65	6.35e-67	26.51	1.8e-78
chr11-124	chr11	98057853	98058029	20.44	1.31e-56	46.11	3.24e-96
chr14-76	chr14	48998937	48999113	20.44	1.31e-56	90.26	4.82e-118
chr15-74	chr15	8090778	8090954	61.31	7.37e-85	30.09	1.69e-82
chr15-72	chr15	59083136	59083312	61.31	7.37e-85	37.21	2.62e-89
chr16-55	chr16	4293350	4293526	30.65	6.35e-67	60.6	4.57e-105
chr16-59	chr16	24741276	24741452	122.62	5.18e-103	68.42	5.19e-109
chr18-68	chr18	38148880	38149056	20.44	1.31e-56	33.67	4.27e-86
chr19-62	chr19	12731143	12731319	30.65	6.35e-67	19.02	5.36e-68
chr1-135	chr1	53210233	53210409	60.5	4.49e-83	68.63	1.07e-107
chr1-148	chr1	170477788	170477964	121	6.32e-101	69.77	3.15e-108
chr2-173	chr2	148040828	148041004	30.25	1.94e-65	48.12	2.47e-96
chr2-181	chr2	155222284	155222460	121	6.32e-101	58.96	7.88e-103
chr3-96	chr3	9864221	9864397	30.25	1.94e-65	47.57	5.73e-96
chr3-104	chr3	126464341	126464517	121	6.32e-101	139.55	1.41e-130
chr4-108	chr4	13096262	13096438	30.25	1.94e-65	58.14	2.21e-102
chr4-105	chr4	47724955	47725131	60.5	4.49e-83	57.35	6.11e-102
chr4-103	chr4	56932176	56932352	30.25	1.94e-65	46	6.71e-95
chr4-143	chr4	146498197	146498373	20.17	2.67e-55	38.76	1.88e-89
chr5-127	chr5	113345976	113346152	20.17	2.67e-55	33.49	8.05e-85
chr5-135	chr5	119720905	119721081	30.25	1.94e-65	49.84	1.88e-97
chr5-138	chr5	129966549	129966725	60.5	4.49e-83	67.52	3.55e-107
chr6-104	chr6	31948168	31948344	121	6.32e-101	40.25	1.19e-90
chr6-126	chr6	52472130	52472306	121	6.32e-101	77.53	1.28e-111
chr6-115	chr6	99240911	99241087	121	6.32e-101	76.12	4.97e-111
chr7-83	chr7	118580054	118580230	121	6.32e-101	62.48	1.09e-104
chr9-92	chr9	53680963	53681139	15.13	3.13e-48	65.41	3.71e-106
chr9-107	chr9	58280095	58280271	15.13	3.13e-48	6.49	2.33e-35
chr10-53	chr10	77603269	77603445	121	6.32e-101	23.92	3.03e-74
chr11-121	chr11	7534769	7534945	121	6.32e-101	15.8	2.03e-61
chr11-127	chr11	8575642	8575818	60.5	4.49e-83	25.84	1.17e-76
chr11-139	chr11	11905071	11905247	12.1	7.65e-43	56.57	1.67e-101
chr11-131	chr11	20165121	20165297	15.13	3.13e-48	42.29	3.23e-92
chr11-141	chr11	43525356	43525532	30.25	1.94e-65	58.14	2.21e-102
chr11-119	chr11	59814409	59814585	12.1	7.65e-43	55.82	4.48e-101
chr11-135	chr11	62430640	62430816	121	6.32e-101	41.04	2.88e-91
chr13-82	chr13	37773488	37773664	60.5	4.49e-83	42.29	3.23e-92
chr13-97	chr13	41145533	41145709	30.25	1.94e-65	58.96	7.88e-103
chr13-87	chr13	64107599	64107775	30.25	1.94e-65	58.14	2.21e-102
chr13-99	chr13	92612037	92612213	121	6.32e-101	54.37	3.11e-100
chr14-87	chr14	34359962	34360138	30.25	1.94e-65	31.48	7.33e-83
chr14-88	chr14	64632876	64633052	30.25	1.94e-65	49.84	1.88e-97
chr16-51	chr16	16566950	16567126	12.1	7.65e-43	87.22	2.07e-115
chr17-74	chr17	14693251	14693427	60.5	4.49e-83	44.07	1.57e-93
chr17-75	chr17	35490463	35490639	12.1	7.65e-43	38.41	3.69e-89
chr17-73	chr17	70872505	70872681	12.1	7.65e-43	24.34	8.74e-75
chr17-77	chr17	84745115	84745291	60.5	4.49e-83	99.68	1.03e-119
chr17-71	chr17	90843998	90844174	121	6.32e-101	41.04	2.88e-91
chr18-74	chr18	6275595	6275771	15.13	3.13e-48	50.44	7.78e-98
chr18-75	chr18	30509305	30509481	60.5	4.49e-83	40.64	5.88e-91
chr18-70	chr18	49991960	49992136	30.25	1.94e-65	73.44	7.08e-110
chr18-77	chr18	56744903	56745079	30.25	1.94e-65	30.78	3.7e-82
chr18-72	chr18	75235266	75235442	121	6.32e-101	23.92	3.03e-74
chrX-50	chrX	51684682	51684858	30.25	1.94e-65	36.4	1.85e-87
chrX-48	chrX	60182790	60182966	121	6.32e-101	48.68	1.06e-96
chr1-128	chr1	34073776	34073952	14.92	4.7e-47	12.29	3.89e-53
chr1-151	chr1	39700625	39700801	119.39	7.59e-99	96.06	5.77e-117
chr1-130	chr1	52656722	52656898	59.69	2.7e-81	86.05	1.81e-113
chr1-152	chr1	65800388	65800564	29.85	5.82e-64	65.56	7.7e-105
chr1-153	chr1	87230734	87230910	19.9	5.34e-54	14.49	4.91e-58
chr1-131	chr1	119398789	119398965	59.69	2.7e-81	37.55	2.74e-87
chr1-127	chr1	136696089	136696265	59.69	2.7e-81	20.45	1.84e-68
chr2-164	chr2	21392785	21392961	19.9	5.34e-54	25.82	1.25e-75
chr2-176	chr2	31545409	31545585	59.69	2.7e-81	49.17	9.35e-96
chr2-163	chr2	157967938	157968114	59.69	2.7e-81	51.63	2.71e-97
chr3-111	chr3	102190791	102190967	119.39	7.59e-99	23.21	2.42e-72
chr4-109	chr4	8944005	8944181	29.85	5.82e-64	76.49	9.91e-110
chr4-112	chr4	31960178	31960354	59.69	2.7e-81	60.74	2.01e-102
chr4-116	chr4	44851865	44852041	59.69	2.7e-81	60.74	2.01e-102
chr4-117	chr4	45203445	45203621	19.9	5.34e-54	54.35	6.54e-99
chr4-110	chr4	82401580	82401756	19.9	5.34e-54	26.65	1.3e-76
chr4-114	chr4	84528461	84528637	14.92	4.7e-47	23.21	2.42e-72
chr4-120	chr4	134851269	134851445	119.39	7.59e-99	52.29	1.09e-97
chr5-141	chr5	99552711	99552887	119.39	7.59e-99	79.43	6.29e-111
chr5-134	chr5	119709861	119710037	29.85	5.82e-64	12.71	4.03e-54
chr5-136	chr5	127689044	127689220	59.69	2.7e-81	18.61	1.4e-65
chr6-107	chr6	13748162	13748338	9.95	1.62e-37	40.9	5.8e-90
chr6-112	chr6	54852785	54852961	59.69	2.7e-81	12.99	9.09e-55
chr7-79	chr7	37825896	37826072	59.69	2.7e-81	66.62	2.4e-105
chr8-118	chr8	23753984	23754160	119.39	7.59e-99	43.48	6.94e-92
chr8-113	chr8	108722995	108723171	119.39	7.59e-99	20.55	1.3e-68
chr9-97	chr9	74868318	74868494	59.69	2.7e-81	64.54	2.43e-104
chr9-98	chr9	80391476	80391652	119.39	7.59e-99	84.3	8.17e-113
chr9-102	chr9	83300087	83300263	119.39	7.59e-99	44.41	1.49e-92
chr10-37	chr10	62896930	62897106	29.85	5.82e-64	7.72	1.03e-39
chr10-52	chr10	117805958	117806134	29.85	5.82e-64	19.67	2.83e-67
chr11-115	chr11	6180914	6181090	14.92	4.7e-47	38.6	3.73e-88
chr11-142	chr11	52511971	52512147	59.69	2.7e-81	47.48	1.19e-94
chr11-158	chr11	53336113	53336289	59.69	2.7e-81	49.17	9.35e-96
chr11-146	chr11	86701234	86701410	59.69	2.7e-81	64.54	2.43e-104
chr11-152	chr11	96017895	96018071	29.85	5.82e-64	43.03	1.48e-91
chr11-136	chr11	106724421	106724597	29.85	5.82e-64	21.74	2.45e-70
chr11-137	chr11	117976485	117976661	14.92	4.7e-47	14.65	2.36e-58
chr13-94	chr13	4079998	4080174	119.39	7.59e-99	82.61	3.58e-112
chr14-84	chr14	98933507	98933683	119.39	7.59e-99	93.88	3.11e-116
chr15-76	chr15	100474103	100474279	119.39	7.59e-99	37.89	1.42e-87
chr16-66	chr16	43800304	43800480	29.85	5.82e-64	34.42	1.44e-84
chr17-76	chr17	80497364	80497540	11.94	9.19e-42	30.6	6.72e-81
chr19-63	chr19	3532798	3532974	11.94	9.19e-42	40.5	1.18e-89
chr19-65	chr19	10347986	10348162	119.39	7.59e-99	52.96	4.32e-98
chr19-61	chr19	23056190	23056366	119.39	7.59e-99	45.89	1.39e-93
chr1-164	chr1	7671685	7671861	117.78	8.95e-97	92.61	2.92e-114
chr2-167	chr2	17989156	17989332	29.44	1.72e-62	27.91	5.16e-77
chr2-160	chr2	70619260	70619436	29.44	1.72e-62	49.69	8.21e-95
chr3-102	chr3	86832968	86833144	117.78	8.95e-97	44.29	3.06e-91
chr3-106	chr3	159615038	159615214	117.78	8.95e-97	75.46	7.58e-108
chr4-113	chr4	82511985	82512161	117.78	8.95e-97	31.83	4.78e-81
chr5-125	chr5	25009845	25010021	19.63	1.05e-52	22.03	8.3e-70
chr5-139	chr5	148744850	148745026	29.44	1.72e-62	41.58	2.77e-89
chr6-129	chr6	21986174	21986350	58.89	1.59e-79	84.89	1.56e-111
chr6-113	chr6	65034661	65034837	29.44	1.72e-62	50.31	3.41e-95
chr6-108	chr6	118769852	118770028	29.44	1.72e-62	37.04	1.03e-85
chr6-109	chr6	122366420	122366596	58.89	1.59e-79	41.16	5.71e-89
chr6-110	chr6	122766255	122766431	29.44	1.72e-62	13.1	2.64e-54
chr7-87	chr7	3212149	3212325	29.44	1.72e-62	12.42	9.5e-53
chr7-84	chr7	144562176	144562352	117.78	8.95e-97	84.89	1.56e-111
chr8-131	chr8	4192895	4193071	6.54	1.37e-27	65.72	1.6e-103
chr8-114	chr8	12503463	12503639	8.41	4.56e-33	18.11	6.58e-64
chr8-121	chr8	48728987	48729163	29.44	1.72e-62	38.08	1.44e-86
chr9-95	chr9	18722791	18722967	29.44	1.72e-62	23.42	1.15e-71
chr9-90	chr9	74961367	74961543	58.89	1.59e-79	44.78	1.4e-91
chr10-50	chr10	88684937	88685113	19.63	1.05e-52	32.86	5.05e-82
chr10-51	chr10	108572755	108572931	117.78	8.95e-97	13.86	5.87e-56
chr11-143	chr11	68146677	68146853	117.78	8.95e-97	36.06	6.96e-85
chr11-120	chr11	84277008	84277184	29.44	1.72e-62	50.31	3.41e-95
chr11-126	chr11	111843983	111844159	117.78	8.95e-97	60.82	4.21e-101
chr12-73	chr12	12803700	12803876	29.44	1.72e-62	49.69	8.21e-95
chr13-84	chr13	39523993	39524169	117.78	8.95e-97	45.27	6.37e-92
chr13-90	chr13	45306309	45306485	117.78	8.95e-97	58.21	9.77e-100
chr13-89	chr13	105256867	105257043	117.78	8.95e-97	50.31	3.41e-95
chr14-80	chr14	116869568	116869744	117.78	8.95e-97	55.06	5.26e-98
chr15-82	chr15	56742831	56743007	29.44	1.72e-62	45.78	2.87e-92
chr17-83	chr17	17425121	17425297	117.78	8.95e-97	69.06	4.51e-105
chr18-76	chr18	14674537	14674713	58.89	1.59e-79	24.25	9.85e-73
chr18-81	chr18	82915877	82916053	58.89	1.59e-79	42.89	3.02e-90
chr1-138	chr1	7451782	7451958	29.04	1.72e-62	80.38	2.41e-108
chr1-124	chr1	10031754	10031930	19.36	1.05e-52	78.8	9.85e-108
chr1-141	chr1	74245608	74245784	116.16	8.95e-97	65.88	3.32e-102
chr1-147	chr1	156669788	156669964	29.04	1.72e-62	32.94	5.33e-81
chr2-159	chr2	20934485	20934661	29.04	1.72e-62	29.12	2.87e-77
chr2-178	chr2	43365944	43366120	58.08	1.59e-79	70.51	2.7e-104
chr2-179	chr2	135072557	135072733	29.04	1.72e-62	29.12	2.87e-77
chr2-190	chr2	152029421	152029597	58.08	1.59e-79	68.12	3.12e-103
chr2-182	chr2	156690984	156691160	29.04	1.72e-62	24.36	6.89e-72
chr3-105	chr3	79435104	79435280	58.08	1.59e-79	54.31	2.9e-96
chr3-100	chr3	103127284	103127460	14.52	6.94e-46	25.28	5.32e-73
chr3-108	chr3	119095259	119095435	19.36	1.05e-52	74.42	5.72e-106
chr4-129	chr4	55209057	55209233	58.08	1.59e-79	42.3	1.3e-88
chr4-118	chr4	57163440	57163616	58.08	1.59e-79	65.88	3.32e-102
chr4-119	chr4	102235450	102235626	58.08	1.59e-79	62.8	9.98e-101
chr4-122	chr4	119592580	119592756	58.08	1.59e-79	103.05	4.99e-116
chr6-118	chr6	4739906	4740082	29.04	1.72e-62	23.1	2.69e-70
chr6-119	chr6	28762485	28762661	58.08	1.59e-79	23.5	8.11e-71
chr6-100	chr6	34187541	34187717	19.36	1.05e-52	32.67	9.43e-81
chr6-120	chr6	34717439	34717615	19.36	1.05e-52	35.25	4.65e-83
chr6-131	chr6	54096257	54096433	29.04	1.72e-62	13.35	3.92e-54
chr7-85	chr7	28578646	28578822	29.04	1.72e-62	37.91	2.84e-85
chr7-82	chr7	97804570	97804746	19.36	1.05e-52	19.9	7.6e-66
chr8-122	chr8	25513443	25513619	29.04	1.72e-62	37.21	1.05e-84
chr8-115	chr8	57722880	57723056	58.08	1.59e-79	50.24	7.14e-94
chr8-125	chr8	92133048	92133224	116.16	8.95e-97	13.22	7.59e-54
chr9-105	chr9	14233822	14233998	58.08	1.59e-79	78.8	9.85e-108
chr9-103	chr9	97113672	97113848	116.16	8.95e-97	29.12	2.87e-77
chr9-104	chr9	114557317	114557493	19.36	1.05e-52	29.12	2.87e-77
chr10-54	chr10	95220473	95220649	116.16	8.95e-97	27.72	8.94e-76
chr11-132	chr11	25994234	25994410	19.36	1.05e-52	59.98	2.56e-99
chr11-163	chr11	62845887	62846063	14.52	6.94e-46	83.73	1.32e-109
chr12-77	chr12	12927208	12927384	116.16	8.95e-97	32.15	2.91e-80
chr12-78	chr12	12983162	12983338	29.04	1.72e-62	22.97	3.99e-70
chr12-72	chr12	33035766	33035942	58.08	1.59e-79	70.51	2.7e-104
chr12-76	chr12	111143154	111143330	58.08	1.59e-79	55.05	1.11e-96
chr13-95	chr13	34287566	34287742	58.08	1.59e-79	30.22	2.2e-78
chr13-91	chr13	51921007	51921183	19.36	1.05e-52	20.4	1.37e-66
chr14-93	chr14	18666301	18666477	116.16	8.95e-97	60.89	8.83e-100
chr14-91	chr14	62334395	62334571	116.16	8.95e-97	26.62	1.49e-74
chr16-58	chr16	33734720	33734896	11.62	1.09e-40	66.98	1.03e-102
chr17-79	chr17	23789864	23790040	58.08	1.59e-79	50.87	2.94e-94
chr17-84	chr17	33892536	33892712	29.04	1.72e-62	69.29	9.27e-104
chr17-81	chr17	75557164	75557340	9.68	1.59e-36	63.79	3.27e-101
chrX-53	chrX	103611616	103611792	58.08	1.59e-79	31.9	5.07e-80
chr1-149	chr1	20761496	20761672	57.27	9.24e-78	44.53	5.93e-89
chr1-140	chr1	36898931	36899107	14.32	1.01e-44	45.04	2.71e-89
chr1-166	chr1	75027126	75027302	28.64	4.98e-61	49.54	3.59e-92
chr1-146	chr1	98073218	98073394	114.55	1.04e-94	42.61	1.25e-87
chr1-170	chr1	106176938	106177114	114.55	1.04e-94	52.84	4.01e-94
chr1-180	chr1	186922855	186923031	28.64	4.98e-61	32.75	9.97e-80
chr2-194	chr2	5220046	5220222	114.55	1.04e-94	46.62	2.43e-90
chr2-170	chr2	22294463	22294639	28.64	4.98e-61	60.97	1.85e-98
chr2-185	chr2	69222149	69222325	114.55	1.04e-94	58.28	4.32e-97
chr2-168	chr2	83718462	83718638	28.64	4.98e-61	76.21	3.03e-105
chr2-165	chr2	119707744	119707920	114.55	1.04e-94	62.91	2.09e-99
chr2-193	chr2	174288023	174288199	57.27	9.24e-78	34.76	1.64e-81
chr3-110	chr3	84020710	84020886	11.45	1.26e-39	48.93	8.52e-92
chr3-117	chr3	122390088	122390264	57.27	9.24e-78	54.29	6.1e-95
chr6-128	chr6	16362261	16362437	57.27	9.24e-78	79.26	1.94e-106
chr6-122	chr6	82703849	82704025	28.64	4.98e-61	25.24	5.67e-72
chr6-116	chr6	115252203	115252379	11.45	1.26e-39	110.09	1.85e-116
chr6-111	chr6	141495675	141495851	57.27	9.24e-78	53.56	1.57e-94
chr7-86	chr7	139950558	139950734	28.64	4.98e-61	7.56	1.27e-37
chr8-120	chr8	86888147	86888323	11.45	1.26e-39	38.48	1.48e-84
[truncated: 22,713 more rows]

## Sheet: H3K4_ChIP_ESC
#PeakID	chr	start	end	Fold Change vs Control	p-value vs Control
chr1-1643	chr1	86356891	86362115	15.97	1.33e-64
chr1-823	chr1	86524613	86530234	11.88	2.2e-66
chr10-1296	chr10	79851750	79857562	11.77	4.16e-57
chr10-1622	chr10	81174061	81179688	9.54	6.31e-52
chr11-1081	chr11	3191720	3194462	2.27	7.45e-13
chr11-2820	chr11	48797889	48803382	81.52	6.42e-122
chr11-2853	chr11	117964787	117971151	9.22	7.09e-44
chr11-3016	chr11	3287824	3294117	8.59	2.88e-44
chr11-3504	chr11	97697315	97705148	11.2	5.29e-60
chr12-601	chr12	12936813	12944106	11.84	2.62e-65
chr15-907	chr15	80079853	80084582	19.82	7.87e-72
chr17-1506	chr17	70847592	70855001	9.12	3.77e-54
chr17-920	chr17	34116282	34124571	12.26	7.83e-78
chr18-423	chr18	75365796	75374524	7.51	1e-42
chr19-1144	chr19	5796679	5804949	11.66	3.08e-64
chr19-1530	chr19	23139537	23147372	12.33	1.95e-61
chr19-1807	chr19	8817225	8822203	14.94	1.16e-58
chr2-1793	chr2	39002404	39010261	14.46	9.16e-67
chr2-2240	chr2	163053444	163062886	13.73	1.34e-72
chr3-664	chr3	96556866	96561982	9.47	8.15e-46
chr4-2497	chr4	150235831	150242883	17.37	3.81e-73
chr7-2067	chr7	16780608	16785711	15.21	5.06e-61
chr7-2079	chr7	45125266	45130714	11.27	7.31e-53
chr8-1131	chr8	13103422	13107389	18.73	2.09e-65
chr8-1220	chr8	107055312	107058736	9.1	6.48e-43
chr8-1492	chr8	89040129	89047355	18.43	3.86e-64
chr8-1872	chr8	11633164	11637398	18.48	3.86e-64
chr8-2321	chr8	70894968	70899281	8.19	1.44e-40
chr8-2356	chr8	84659092	84666865	15.06	3.27e-106
chr8-2470	chr8	70041099	70044713	8.08	1.17e-39
chr8-2745	chr8	84975104	84981244	19.55	1.56e-70
chr9-2116	chr9	57070736	57078085	10.57	8.09e-55
chr9-462	chr9	59655495	59663676	10.61	5.93e-62
chr1-1035	chr1	77043922	77044054	27.7	5.38e-15
chr1-1036	chr1	77371077	77371209	14.92	1.85e-12
chr1-1038	chr1	80728346	80728478	14.92	1.85e-12
chr1-1039	chr1	80854509	80854641	27.7	5.38e-15
chr1-104	chr1	106155390	106155522	7.99	2.04e-25
chr1-1041	chr1	82358868	82359000	6.93	1.02e-07
chr1-1042	chr1	82724810	82724942	11.72	4.88e-09
chr1-1044	chr1	87187098	87187230	27.7	5.38e-15
chr1-1046	chr1	89136537	89136669	14.92	1.85e-12
chr1-1049	chr1	90561070	90561202	4.62	8.38e-06
chr1-105	chr1	119329035	119329167	22.91	1.52e-42
chr1-1050	chr1	90915327	90915459	7.46	1.35e-08
chr1-1052	chr1	91380546	91380678	6.93	1.02e-07
chr1-1053	chr1	93635704	93635836	6.93	1.02e-07
chr1-1054	chr1	95268222	95268354	13.85	2.75e-11
chr1-1055	chr1	105990224	105990356	27.7	5.38e-15
chr1-1056	chr1	111864890	111865022	13.85	2.75e-11
chr1-1057	chr1	118976818	118976950	4.26	3.94e-05
chr1-1059	chr1	119053640	119053772	4.97	1.66e-06
chr1-106	chr1	135852503	135852635	14.56	5.19e-33
chr1-1060	chr1	119087681	119087813	13.85	2.75e-11
chr1-1063	chr1	121180449	121180581	13.85	2.75e-11
chr1-1065	chr1	127339177	127339309	4.62	8.38e-06
chr1-1067	chr1	132111382	132111514	7.46	1.35e-08
chr1-1068	chr1	132844190	132844322	13.85	2.75e-11
chr1-107	chr1	178336498	178336630	21.31	1.71e-38
chr1-1070	chr1	134205429	134205561	13.85	2.75e-11
chr1-1071	chr1	134415281	134415413	4.62	8.38e-06
chr1-1072	chr1	134858859	134858991	27.7	5.38e-15
chr1-1074	chr1	135347976	135348108	4.62	8.38e-06
chr1-1075	chr1	135368371	135368503	14.92	1.85e-12
chr1-1077	chr1	135563919	135564051	7.46	1.35e-08
chr1-1078	chr1	135625938	135626070	4.62	8.38e-06
chr1-1079	chr1	136940714	136940846	13.85	2.75e-11
chr1-1080	chr1	137656879	137657011	7.46	1.35e-08
chr1-1081	chr1	143145180	143145312	12.79	3.81e-10
chr1-1082	chr1	143941582	143941714	7.46	1.35e-08
chr1-1083	chr1	150535862	150535994	6.39	7.13e-07
chr1-1084	chr1	151500674	151500806	7.46	1.35e-08
chr1-1085	chr1	151925842	151925974	29.83	1.8e-16
chr1-1086	chr1	156938929	156939061	6.93	1.02e-07
chr1-1087	chr1	157244455	157244587	7.46	1.35e-08
chr1-1088	chr1	157418063	157418195	7.46	1.35e-08
chr1-1089	chr1	157446428	157446560	15.98	1.16e-13
chr1-109	chr1	38450778	38450910	21.31	1.71e-38
chr1-1090	chr1	159761098	159761230	29.83	1.8e-16
chr1-1091	chr1	160115360	160115492	13.85	2.75e-11
chr1-1092	chr1	163994774	163994906	7.46	1.35e-08
chr1-1093	chr1	165634416	165634548	6.93	1.02e-07
chr1-1094	chr1	165853846	165853978	14.92	1.85e-12
chr1-1095	chr1	166154310	166154442	13.85	2.75e-11
chr1-1097	chr1	168291277	168291409	6.93	1.02e-07
chr1-1098	chr1	168355102	168355234	4.97	1.66e-06
chr1-1099	chr1	168384410	168384542	13.85	2.75e-11
chr1-11	chr1	88658477	88658609	46.35	4.6e-110
chr1-110	chr1	73270918	73271050	21.84	7.82e-40
chr1-1100	chr1	169052002	169052134	6.93	1.02e-07
chr1-1101	chr1	171411132	171411264	5.33	3.07e-07
chr1-1102	chr1	171501644	171501776	29.83	1.8e-16
chr1-1103	chr1	171504078	171504210	27.7	5.38e-15
chr1-1105	chr1	172357687	172357819	27.7	5.38e-15
chr1-1106	chr1	174501705	174501837	6.93	1.02e-07
chr1-1107	chr1	175880598	175880730	13.85	2.75e-11
chr1-1108	chr1	177322805	177322937	6.93	1.02e-07
chr1-1109	chr1	177646155	177646287	7.46	1.35e-08
chr1-111	chr1	152904658	152904790	89.5	7.05e-66
chr1-1110	chr1	178357904	178358036	7.46	1.35e-08
chr1-1112	chr1	179842638	179842770	7.99	1.68e-09
chr1-1113	chr1	180365598	180365730	6.93	1.02e-07
chr1-1114	chr1	180377535	180377667	29.83	1.8e-16
chr1-1116	chr1	182103491	182103623	4.62	8.38e-06
chr1-1118	chr1	182663811	182663943	15.98	1.16e-13
chr1-112	chr1	170521673	170521805	21.84	7.82e-40
chr1-1122	chr1	183783951	183784083	12.79	3.81e-10
chr1-1123	chr1	184441419	184441551	6.93	1.02e-07
chr1-1124	chr1	189507375	189507507	13.85	2.75e-11
chr1-1125	chr1	190728093	190728225	14.92	1.85e-12
chr1-1126	chr1	191026130	191026262	6.93	1.02e-07
chr1-1128	chr1	191907574	191907706	14.92	1.85e-12
chr1-1129	chr1	194721411	194721543	14.92	1.85e-12
chr1-113	chr1	34005856	34005988	14.21	7.57e-32
chr1-1130	chr1	194976893	194977025	4.62	8.38e-06
chr1-1131	chr1	195131008	195131140	14.92	1.85e-12
chr1-1133	chr1	7397344	7397476	14.92	1.85e-12
chr1-1136	chr1	21411670	21411802	25.57	1.49e-13
chr1-1138	chr1	25893079	25893211	13.85	2.75e-11
chr1-1139	chr1	30950326	30950458	13.85	2.75e-11
chr1-114	chr1	84155345	84155477	40.49	6.71e-47
chr1-1140	chr1	33814490	33814622	5.33	2.75e-05
chr1-1141	chr1	34005456	34005588	27.7	5.38e-15
chr1-1142	chr1	34304304	34304436	13.85	2.75e-11
chr1-1145	chr1	36003725	36003857	6.93	1.02e-07
chr1-1146	chr1	36303705	36303837	6.93	1.02e-07
chr1-1148	chr1	36939505	36939637	6.39	7.13e-07
chr1-1149	chr1	37865207	37865339	12.79	3.81e-10
chr1-115	chr1	88478271	88478403	87.37	6.31e-64
chr1-1151	chr1	39736229	39736361	7.46	1.35e-08
chr1-1152	chr1	39923510	39923642	4.62	8.38e-06
chr1-1153	chr1	42527738	42527870	13.85	2.75e-11
chr1-1155	chr1	42630092	42630224	12.79	3.81e-10
chr1-1156	chr1	44591874	44592006	4.97	1.66e-06
chr1-1157	chr1	52652963	52653095	27.7	5.38e-15
chr1-1158	chr1	54438948	54439080	7.46	1.35e-08
chr1-116	chr1	91209512	91209644	21.84	7.82e-40
chr1-1160	chr1	54922797	54922929	12.79	3.81e-10
chr1-1161	chr1	55088534	55088666	13.85	2.75e-11
chr1-1162	chr1	55226488	55226620	6.93	1.02e-07
chr1-1163	chr1	55383227	55383359	4.26	3.94e-05
chr1-1165	chr1	55528728	55528860	27.7	5.38e-15
chr1-1166	chr1	55665911	55666043	6.93	1.02e-07
chr1-1167	chr1	55742071	55742203	25.57	1.49e-13
chr1-1168	chr1	61621090	61621222	13.85	2.75e-11
chr1-1169	chr1	62951485	62951617	6.93	1.02e-07
chr1-117	chr1	139337090	139337222	10.92	2.76e-28
chr1-1170	chr1	62964357	62964489	4.26	3.94e-05
chr1-1172	chr1	64302910	64303042	6.93	1.02e-07
chr1-1173	chr1	64795411	64795543	6.93	1.02e-07
chr1-1174	chr1	64918834	64918966	6.93	1.02e-07
chr1-1175	chr1	66692809	66692941	12.79	3.81e-10
chr1-1176	chr1	66861880	66862012	6.93	1.02e-07
chr1-1178	chr1	73640835	73640967	6.93	1.02e-07
chr1-1179	chr1	74119208	74119340	27.7	5.38e-15
chr1-118	chr1	179446678	179446810	45.82	4.23e-55
chr1-1182	chr1	74455756	74455888	27.7	5.38e-15
chr1-1184	chr1	74808155	74808287	13.85	2.75e-11
chr1-1185	chr1	78761441	78761573	6.39	7.13e-07
chr1-1186	chr1	79598855	79598987	27.7	5.38e-15
chr1-1187	chr1	81220046	81220178	27.7	5.38e-15
chr1-1188	chr1	82634689	82634821	12.79	3.81e-10
chr1-1189	chr1	85894509	85894641	5.86	4.62e-06
chr1-119	chr1	25996794	25996926	85.24	5.51e-62
chr1-1190	chr1	87313986	87314118	25.57	1.49e-13
chr1-1191	chr1	87458203	87458335	13.85	2.75e-11
chr1-1192	chr1	88937459	88937591	12.79	3.81e-10
chr1-1196	chr1	90775659	90775791	7.46	1.35e-08
chr1-1197	chr1	91182204	91182336	13.85	2.75e-11
chr1-1198	chr1	91239231	91239363	6.93	1.02e-07
chr1-1199	chr1	91298374	91298506	13.85	2.75e-11
chr1-12	chr1	143080453	143080585	90.57	6.32e-132
chr1-120	chr1	42713456	42713588	10.39	3.23e-26
chr1-1200	chr1	91398916	91399048	6.93	1.02e-07
chr1-1201	chr1	91494474	91494606	6.39	7.13e-07
chr1-1202	chr1	91540597	91540729	25.57	1.49e-13
chr1-1204	chr1	92098575	92098707	13.85	2.75e-11
chr1-1206	chr1	92174682	92174814	13.85	2.75e-11
chr1-1207	chr1	92180994	92181126	6.93	1.02e-07
chr1-1209	chr1	92438071	92438203	25.57	1.49e-13
chr1-121	chr1	73998802	73998934	42.62	3.79e-50
chr1-1210	chr1	92473722	92473854	6.93	1.02e-07
chr1-1212	chr1	97833864	97833996	25.57	1.49e-13
chr1-1213	chr1	104828218	104828350	27.7	5.38e-15
chr1-1215	chr1	125639750	125639882	6.93	1.02e-07
chr1-1216	chr1	126431774	126431906	27.7	5.38e-15
chr1-1217	chr1	127239878	127240010	6.39	7.13e-07
chr1-1219	chr1	131063117	131063249	6.93	1.02e-07
chr1-122	chr1	86032406	86032538	10.12	3.36e-25
chr1-1220	chr1	131461351	131461483	12.79	3.81e-10
chr1-1222	chr1	132430866	132430998	11.72	4.88e-09
chr1-1224	chr1	132917651	132917783	12.79	3.81e-10
chr1-1225	chr1	134038471	134038603	25.57	1.49e-13
chr1-1226	chr1	134046070	134046202	4.62	8.38e-06
chr1-1228	chr1	134233173	134233305	4.97	1.66e-06
chr1-1229	chr1	134332836	134332968	13.85	2.75e-11
chr1-123	chr1	106241169	106241301	42.62	3.79e-50
chr1-1230	chr1	135147362	135147494	11.72	4.88e-09
chr1-1232	chr1	135430576	135430708	4.62	8.38e-06
chr1-1233	chr1	135515371	135515503	6.93	1.02e-07
chr1-1234	chr1	135734776	135734908	4.62	8.38e-06
chr1-1235	chr1	136381352	136381484	23.44	3.81e-12
chr1-1236	chr1	136455994	136456126	6.39	7.13e-07
chr1-1237	chr1	136466208	136466340	13.85	2.75e-11
chr1-1238	chr1	136730663	136730795	25.57	1.49e-13
chr1-1239	chr1	136782336	136782468	13.85	2.75e-11
chr1-124	chr1	152165549	152165681	20.24	7.59e-36
chr1-1240	chr1	137255255	137255387	27.7	5.38e-15
chr1-1242	chr1	139232694	139232826	5.86	4.62e-06
chr1-1243	chr1	151343041	151343173	6.39	7.13e-07
chr1-1244	chr1	152817079	152817211	12.79	3.81e-10
chr1-1245	chr1	153011644	153011776	4.26	3.94e-05
chr1-1247	chr1	154202775	154202907	6.93	1.02e-07
chr1-1248	chr1	154820148	154820280	12.79	3.81e-10
chr1-1249	chr1	155158740	155158872	4.26	3.94e-05
chr1-125	chr1	169051555	169051687	21.84	7.82e-40
chr1-1250	chr1	155159159	155159291	4.26	3.94e-05
chr1-1253	chr1	156674560	156674692	12.79	3.81e-10
chr1-1254	chr1	157039683	157039815	12.79	3.81e-10
chr1-1255	chr1	157828055	157828187	4.97	1.66e-06
chr1-1258	chr1	162081826	162081958	4.62	8.38e-06
chr1-1259	chr1	162209582	162209714	25.57	1.49e-13
chr1-126	chr1	190979214	190979346	87.37	6.31e-64
chr1-1260	chr1	162548590	162548722	6.93	1.02e-07
chr1-1263	chr1	166885545	166885677	12.79	3.81e-10
chr1-1265	chr1	168180699	168180831	12.79	3.81e-10
chr1-1267	chr1	168245684	168245816	6.93	1.02e-07
chr1-1268	chr1	168358433	168358565	27.7	5.38e-15
chr1-127	chr1	20867683	20867815	42.62	3.79e-50
chr1-1270	chr1	171411482	171411614	4.26	3.94e-05
chr1-1271	chr1	172148134	172148266	4.26	3.94e-05
chr1-1272	chr1	172242569	172242701	14.92	1.85e-12
chr1-1275	chr1	172412352	172412484	4.62	8.38e-06
chr1-1277	chr1	176849490	176849622	25.57	1.49e-13
chr1-128	chr1	30949854	30949986	80.98	3.91e-58
chr1-1281	chr1	182409169	182409301	6.39	7.13e-07
chr1-1282	chr1	183388929	183389061	4.62	8.38e-06
chr1-1285	chr1	184748688	184748820	6.93	1.02e-07
chr1-1288	chr1	187684644	187684776	25.57	1.49e-13
chr1-1289	chr1	189228757	189228889	13.85	2.75e-11
chr1-129	chr1	54585653	54585785	83.11	4.7e-60
chr1-1291	chr1	193151255	193151387	13.85	2.75e-11
chr1-1292	chr1	193433624	193433756	6.93	1.02e-07
chr1-1294	chr1	13936068	13936200	11.72	4.88e-09
chr1-1295	chr1	14011674	14011806	4.26	3.94e-05
chr1-1296	chr1	16105722	16105854	23.44	3.81e-12
chr1-1297	chr1	19850090	19850222	12.79	3.81e-10
chr1-1298	chr1	21593979	21594111	25.57	1.49e-13
chr1-1299	chr1	22594936	22595068	6.39	7.13e-07
chr1-13	chr1	135741236	135741368	46.35	4.6e-110
chr1-130	chr1	72307319	72307451	7.88	5.28e-21
chr1-1300	chr1	22615242	22615374	25.57	1.49e-13
chr1-1303	chr1	33814154	33814286	5.86	4.62e-06
chr1-1304	chr1	34183615	34183747	12.79	3.81e-10
chr1-1305	chr1	35469326	35469458	11.72	4.88e-09
chr1-1307	chr1	37513041	37513173	4.26	3.94e-05
chr1-1308	chr1	38198574	38198706	23.44	3.81e-12
chr1-131	chr1	74111435	74111567	7.88	5.28e-21
chr1-1310	chr1	39001224	39001356	4.26	3.94e-05
chr1-1312	chr1	42678766	42678898	11.72	4.88e-09
chr1-1318	chr1	43714917	43715049	6.39	7.13e-07
chr1-1319	chr1	43774008	43774140	4.26	3.94e-05
chr1-132	chr1	82150897	82151029	20.24	7.59e-36
chr1-1322	chr1	52233238	52233370	5.86	4.62e-06
chr1-1325	chr1	57634148	57634280	11.72	4.88e-09
chr1-1328	chr1	61198683	61198815	25.57	1.49e-13
chr1-1329	chr1	62582515	62582647	6.39	7.13e-07
chr1-133	chr1	82243434	82243566	7.67	4.18e-20
chr1-1332	chr1	66862992	66863124	5.86	4.62e-06
chr1-1333	chr1	69157514	69157646	9.59	6.09e-07
chr1-1335	chr1	69508168	69508300	25.57	1.49e-13
chr1-1336	chr1	70853489	70853621	12.79	3.81e-10
chr1-1337	chr1	72751407	72751539	11.72	4.88e-09
chr1-134	chr1	159686512	159686644	13.5	1.5e-29
chr1-1342	chr1	74303993	74304125	5.33	2.75e-05
chr1-1343	chr1	74313394	74313526	12.79	3.81e-10
chr1-1345	chr1	75399998	75400130	5.86	4.62e-06
chr1-1346	chr1	77226679	77226811	11.72	4.88e-09
chr1-1348	chr1	78657814	78657946	11.72	4.88e-09
chr1-135	chr1	165302928	165303060	20.78	3.65e-37
chr1-1350	chr1	79761718	79761850	5.86	4.62e-06
chr1-1351	chr1	82291222	82291354	6.39	7.13e-07
chr1-1354	chr1	82429134	82429266	5.86	4.62e-06
chr1-1356	chr1	84585564	84585696	6.93	1.02e-07
chr1-1359	chr1	85743003	85743135	23.44	3.81e-12
chr1-136	chr1	169485757	169485889	39.42	2.72e-45
chr1-1360	chr1	86154659	86154791	4.26	3.94e-05
chr1-1362	chr1	86705576	86705708	12.79	3.81e-10
chr1-1363	chr1	87035836	87035968	25.57	1.49e-13
chr1-1365	chr1	88668987	88669119	11.72	4.88e-09
chr1-1367	chr1	88745344	88745476	6.39	7.13e-07
chr1-1368	chr1	89196199	89196331	4.62	8.38e-06
chr1-1369	chr1	89454874	89455006	12.79	3.81e-10
chr1-137	chr1	36309585	36309717	78.85	3.16e-56
chr1-1371	chr1	89550222	89550354	6.39	7.13e-07
chr1-1373	chr1	89688943	89689075	11.72	4.88e-09
chr1-1374	chr1	90232547	90232679	5.33	2.75e-05
chr1-1375	chr1	91903770	91903902	6.39	7.13e-07
chr1-1376	chr1	91978572	91978704	4.26	3.94e-05
chr1-1378	chr1	92641959	92642091	11.72	4.88e-09
chr1-138	chr1	36557146	36557278	6.75	2.67e-19
chr1-1380	chr1	92910593	92910725	10.65	5.72e-08
chr1-1381	chr1	93217227	93217359	11.72	4.88e-09
chr1-1382	chr1	93636128	93636260	12.79	3.81e-10
chr1-1383	chr1	97976923	97977055	23.44	3.81e-12
chr1-1384	chr1	102628203	102628335	4.62	8.38e-06
chr1-1387	chr1	112380053	112380185	11.72	4.88e-09
chr1-1388	chr1	118321716	118321848	4.26	3.94e-05
chr1-1389	chr1	118759709	118759841	11.72	4.88e-09
chr1-139	chr1	36949606	36949738	12.79	2.66e-27
chr1-1390	chr1	119388774	119388906	6.39	7.13e-07
chr1-1392	chr1	119879077	119879209	25.57	1.49e-13
chr1-1393	chr1	120093625	120093757	5.86	4.62e-06
chr1-1395	chr1	125455169	125455301	21.31	8.93e-11
chr1-1396	chr1	126656232	126656364	4.26	3.94e-05
chr1-1397	chr1	127414632	127414764	12.79	3.81e-10
chr1-14	chr1	170424697	170424829	44.22	1.98e-103
chr1-140	chr1	61913084	61913216	72.45	1.43e-50
chr1-1400	chr1	128585983	128586115	11.72	4.88e-09
chr1-1401	chr1	131053374	131053506	6.39	7.13e-07
chr1-1402	chr1	131354144	131354276	11.72	4.88e-09
chr1-1404	chr1	131752174	131752306	12.79	3.81e-10
chr1-1405	chr1	132144351	132144483	4.26	3.94e-05
chr1-1409	chr1	132317530	132317662	12.79	3.81e-10
chr1-141	chr1	71540608	71540740	41.55	1.62e-48
chr1-1410	chr1	133046480	133046612	5.86	4.62e-06
chr1-1411	chr1	133069042	133069174	11.72	4.88e-09
chr1-1412	chr1	133177588	133177720	4.26	3.94e-05
chr1-1413	chr1	133306961	133307093	12.79	3.81e-10
chr1-1414	chr1	133434433	133434565	12.79	3.81e-10
chr1-142	chr1	87785851	87785983	13.5	1.5e-29
chr1-1421	chr1	135518648	135518780	4.26	3.94e-05
chr1-1423	chr1	135677063	135677195	12.79	3.81e-10
chr1-1424	chr1	135681282	135681414	6.39	7.13e-07
chr1-1427	chr1	135802166	135802298	11.72	4.88e-09
chr1-1428	chr1	136345585	136345717	6.39	7.13e-07
chr1-1429	chr1	137617526	137617658	12.79	3.81e-10
chr1-143	chr1	94503875	94504007	20.24	7.59e-36
chr1-1430	chr1	137657276	137657408	13.85	2.75e-11
chr1-1431	chr1	138029753	138029885	11.72	4.88e-09
chr1-1433	chr1	139209924	139210056	6.39	7.13e-07
chr1-1435	chr1	150942196	150942328	5.86	4.62e-06
chr1-1436	chr1	151852118	151852250	25.57	1.49e-13
chr1-1437	chr1	152625232	152625364	4.26	3.94e-05
chr1-1438	chr1	153033205	153033337	6.39	7.13e-07
chr1-1439	chr1	153059916	153060048	11.72	4.88e-09
chr1-144	chr1	134096385	134096517	19.18	3.04e-33
chr1-1440	chr1	153107875	153108007	11.72	4.88e-09
chr1-1441	chr1	154786344	154786476	5.86	4.62e-06
chr1-1442	chr1	155114133	155114265	5.33	2.75e-05
chr1-1443	chr1	155557981	155558113	5.86	4.62e-06
chr1-1444	chr1	156241845	156241977	12.79	3.81e-10
chr1-1445	chr1	156931241	156931373	23.44	3.81e-12
chr1-1446	chr1	157114636	157114768	5.86	4.62e-06
chr1-1447	chr1	158356341	158356473	6.39	7.13e-07
chr1-1448	chr1	158860301	158860433	25.57	1.49e-13
chr1-145	chr1	134265934	134266066	10.39	3.23e-26
chr1-1450	chr1	159690278	159690410	12.79	3.81e-10
chr1-1453	chr1	161273592	161273724	5.86	4.62e-06
chr1-1454	chr1	165236815	165236947	4.26	3.94e-05
chr1-1457	chr1	168382966	168383098	12.79	3.81e-10
chr1-1458	chr1	168550200	168550332	23.44	3.81e-12
chr1-1459	chr1	170295280	170295412	6.39	7.13e-07
chr1-146	chr1	160531469	160531601	38.36	1.07e-43
chr1-1461	chr1	171102674	171102806	6.39	7.13e-07
chr1-1462	chr1	171661837	171661969	23.44	3.81e-12
chr1-1464	chr1	172847469	172847601	25.57	1.49e-13
chr1-1465	chr1	175330112	175330244	25.57	1.49e-13
chr1-1467	chr1	177573489	177573621	4.26	3.94e-05
chr1-1468	chr1	178463916	178464048	25.57	1.49e-13
chr1-1469	chr1	179146931	179147063	6.39	7.13e-07
chr1-147	chr1	183140717	183140849	41.55	1.62e-48
chr1-1470	chr1	179517747	179517879	6.39	7.13e-07
chr1-1471	chr1	179645809	179645941	11.72	4.88e-09
chr1-1476	chr1	183048060	183048192	23.44	3.81e-12
chr1-1477	chr1	184441076	184441208	5.86	4.62e-06
chr1-1478	chr1	184845944	184846076	11.72	4.88e-09
chr1-1479	chr1	185493821	185493953	11.72	4.88e-09
chr1-148	chr1	191292561	191292693	18.65	5.83e-32
chr1-1480	chr1	185572733	185572865	12.79	3.81e-10
chr1-1481	chr1	185681589	185681721	5.86	4.62e-06
chr1-1482	chr1	187907938	187908070	5.86	4.62e-06
chr1-1483	chr1	188661019	188661151	6.39	7.13e-07
chr1-1484	chr1	188948419	188948551	5.86	4.62e-06
chr1-1485	chr1	189007839	189007971	6.39	7.13e-07
chr1-1486	chr1	189015491	189015623	5.86	4.62e-06
chr1-1487	chr1	189727955	189728087	23.44	3.81e-12
chr1-1488	chr1	191025606	191025738	6.39	7.13e-07
chr1-149	chr1	59516363	59516495	12.79	2.66e-27
chr1-1490	chr1	193173147	193173279	5.86	4.62e-06
chr1-1493	chr1	193693157	193693289	12.79	3.81e-10
chr1-1494	chr1	193738939	193739071	12.79	3.81e-10
chr1-1495	chr1	193949882	193950014	11.72	4.88e-09
chr1-1496	chr1	194678026	194678158	25.57	1.49e-13
chr1-1498	chr1	4571927	4572059	21.31	8.93e-11
chr1-15	chr1	97540845	97540977	45.28	9.78e-107
chr1-150	chr1	75234687	75234819	12.08	4.25e-25
chr1-1500	chr1	6819994	6820126	5.33	2.75e-05
chr1-1501	chr1	7089106	7089238	5.86	4.62e-06
chr1-1504	chr1	10040137	10040269	5.33	2.75e-05
chr1-1505	chr1	12000580	12000712	23.44	3.81e-12
chr1-1506	chr1	12016841	12016973	27.7	5.38e-15
chr1-1509	chr1	13171263	13171395	11.72	4.88e-09
chr1-151	chr1	80637297	80637429	12.79	2.66e-27
chr1-1511	chr1	16618516	16618648	5.33	2.75e-05
chr1-1512	chr1	17838522	17838654	11.72	4.88e-09
chr1-1513	chr1	20933566	20933698	5.33	2.75e-05
chr1-1514	chr1	22805820	22805952	5.86	4.62e-06
chr1-1518	chr1	34842449	34842581	11.72	4.88e-09
chr1-152	chr1	165046666	165046798	38.36	1.07e-43
chr1-1521	chr1	36445282	36445414	4.26	3.94e-05
chr1-1522	chr1	36475602	36475734	5.86	4.62e-06
chr1-1523	chr1	36603413	36603545	5.86	4.62e-06
chr1-1526	chr1	39367781	39367913	5.33	2.75e-05
chr1-1528	chr1	41888366	41888498	5.33	2.75e-05
chr1-153	chr1	168216246	168216378	4.53	1.38e-12
chr1-1530	chr1	42923972	42924104	11.72	4.88e-09
chr1-1531	chr1	43446679	43446811	10.65	5.72e-08
chr1-1532	chr1	44102377	44102509	21.31	8.93e-11
chr1-1534	chr1	51636804	51636936	23.44	3.81e-12
chr1-1535	chr1	51879354	51879486	5.86	4.62e-06
chr1-1536	chr1	51976725	51976857	10.65	5.72e-08
chr1-1537	chr1	52146676	52146808	23.44	3.81e-12
chr1-1539	chr1	53038402	53038534	21.31	8.93e-11
chr1-154	chr1	186655329	186655461	37.29	4.11e-42
chr1-1540	chr1	53352742	53352874	10.65	5.72e-08
chr1-1541	chr1	53785112	53785244	5.33	2.75e-05
chr1-1542	chr1	54735077	54735209	23.44	3.81e-12
chr1-1543	chr1	54826753	54826885	17.05	3.65e-08
chr1-1545	chr1	55874267	55874399	11.72	4.88e-09
chr1-1546	chr1	58029610	58029742	5.86	4.62e-06
chr1-1547	chr1	58423562	58423694	19.18	1.9e-09
chr1-1549	chr1	59309256	59309388	5.86	4.62e-06
chr1-155	chr1	35869744	35869876	36.23	1.53e-40
chr1-1550	chr1	59524203	59524335	23.44	3.81e-12
chr1-1551	chr1	60931439	60931571	21.31	8.93e-11
chr1-1554	chr1	62665014	62665146	11.72	4.88e-09
chr1-1555	chr1	62701054	62701186	5.33	2.75e-05
chr1-1556	chr1	62786404	62786536	10.65	5.72e-08
chr1-1558	chr1	64295851	64295983	11.72	4.88e-09
chr1-156	chr1	80237565	80237697	72.45	1.43e-50
chr1-1560	chr1	64537920	64538052	19.18	1.9e-09
chr1-1561	chr1	64737503	64737635	11.72	4.88e-09
chr1-1566	chr1	72033712	72033844	23.44	3.81e-12
chr1-1568	chr1	72226322	72226454	23.44	3.81e-12
chr1-1569	chr1	72859083	72859215	23.44	3.81e-12
chr1-157	chr1	121177314	121177446	36.23	1.53e-40
chr1-1573	chr1	74094639	74094771	5.33	2.75e-05
chr1-1575	chr1	74343442	74343574	5.86	4.62e-06
chr1-1576	chr1	75210888	75211020	5.86	4.62e-06
chr1-1577	chr1	75505639	75505771	4.26	3.94e-05
chr1-1578	chr1	76942741	76942873	4.26	3.94e-05
chr1-158	chr1	128561370	128561502	76.72	2.49e-54
chr1-1581	chr1	77410287	77410419	21.31	8.93e-11
chr1-1582	chr1	78536881	78537013	11.72	4.88e-09
chr1-1584	chr1	80218447	80218579	5.86	4.62e-06
chr1-1585	chr1	80656419	80656551	9.59	6.09e-07
chr1-1586	chr1	80758417	80758549	10.65	5.72e-08
chr1-1587	chr1	81301816	81301948	5.33	2.75e-05
chr1-1588	chr1	82294292	82294424	5.86	4.62e-06
chr1-1589	chr1	84217955	84218087	11.72	4.88e-09
chr1-159	chr1	135158729	135158861	38.36	1.07e-43
chr1-1590	chr1	84443689	84443821	10.65	5.72e-08
chr1-1593	chr1	85793341	85793473	21.31	8.93e-11
chr1-1596	chr1	86421112	86421244	11.72	4.88e-09
chr1-1598	chr1	86582823	86582955	5.86	4.62e-06
chr1-16	chr1	131078969	131079101	22.91	2.58e-83
chr1-160	chr1	160856007	160856139	37.29	4.11e-42
chr1-1600	chr1	88623627	88623759	5.33	2.75e-05
chr1-1603	chr1	89880880	89881012	5.86	4.62e-06
chr1-1604	chr1	89887484	89887616	5.86	4.62e-06
chr1-161	chr1	194613597	194613729	9.32	3.24e-22
chr1-1611	chr1	92092489	92092621	11.72	4.88e-09
chr1-1612	chr1	92124891	92125023	11.72	4.88e-09
chr1-1613	chr1	92744897	92745029	10.65	5.72e-08
chr1-1614	chr1	92831729	92831861	5.33	2.75e-05
chr1-1615	chr1	92832772	92832904	11.72	4.88e-09
chr1-1616	chr1	93479509	93479641	10.65	5.72e-08
chr1-1617	chr1	93685416	93685548	19.18	1.9e-09
chr1-1618	chr1	93801806	93801938	10.65	5.72e-08
chr1-1619	chr1	93803448	93803580	21.31	8.93e-11
chr1-162	chr1	64655535	64655667	36.23	1.53e-40
chr1-1620	chr1	100180132	100180264	4.97	1.66e-06
chr1-1622	chr1	106232542	106232674	23.44	3.81e-12
chr1-1623	chr1	106380556	106380688	23.44	3.81e-12
chr1-1624	chr1	106713977	106714109	5.33	2.75e-05
chr1-1626	chr1	108102446	108102578	11.72	4.88e-09
chr1-1627	chr1	108452833	108452965	12.79	3.81e-10
chr1-1628	chr1	118481419	118481551	5.86	4.62e-06
chr1-163	chr1	79776001	79776133	4.53	1.38e-12
chr1-1631	chr1	126046300	126046432	21.31	8.93e-11
chr1-1635	chr1	130715566	130715698	11.72	4.88e-09
chr1-1636	chr1	130716956	130717088	6.39	7.13e-07
chr1-1638	chr1	131181778	131181910	10.65	5.72e-08
chr1-164	chr1	91209918	91210050	36.23	1.53e-40
chr1-1641	chr1	131937781	131937913	10.65	5.72e-08
chr1-1643	chr1	132046490	132046622	11.72	4.88e-09
chr1-1645	chr1	132326976	132327108	5.33	2.75e-05
chr1-1649	chr1	133057463	133057595	5.86	4.62e-06
chr1-165	chr1	119033941	119034073	36.23	1.53e-40
chr1-1652	chr1	133356784	133356916	21.31	8.93e-11
chr1-1654	chr1	134302540	134302672	25.57	1.49e-13
chr1-1657	chr1	135543271	135543403	21.31	8.93e-11
chr1-1658	chr1	135616033	135616165	11.72	4.88e-09
chr1-1659	chr1	135688323	135688455	11.72	4.88e-09
chr1-166	chr1	120115899	120116031	9.06	3.03e-21
chr1-1662	chr1	136076240	136076372	5.86	4.62e-06
chr1-1665	chr1	136415169	136415301	5.86	4.62e-06
chr1-1666	chr1	136456433	136456565	10.65	5.72e-08
chr1-1667	chr1	136624877	136625009	10.65	5.72e-08
chr1-167	chr1	156754641	156754773	17.58	1.98e-29
chr1-1674	chr1	143640690	143640822	9.59	6.09e-07
chr1-1675	chr1	144004408	144004540	5.86	4.62e-06
chr1-1676	chr1	144299726	144299858	10.65	5.72e-08
chr1-168	chr1	170459966	170460098	18.11	1.09e-30
chr1-1680	chr1	150546129	150546261	13.85	2.75e-11
chr1-1681	chr1	151344519	151344651	5.33	2.75e-05
chr1-1682	chr1	151890442	151890574	5.86	4.62e-06
chr1-1683	chr1	151957784	151957916	5.86	4.62e-06
chr1-1685	chr1	152414852	152414984	10.65	5.72e-08
chr1-1688	chr1	152766241	152766373	11.72	4.88e-09
chr1-169	chr1	4857616	4857748	11.72	5.15e-24
chr1-1690	chr1	153265087	153265219	6.93	1.02e-07
chr1-1691	chr1	153278107	153278239	5.33	2.75e-05
chr1-1692	chr1	153594960	153595092	25.57	1.49e-13
chr1-1696	chr1	156229586	156229718	4.26	3.94e-05
chr1-1697	chr1	157079453	157079585	11.72	4.88e-09
chr1-17	chr1	21805127	21805259	32.32	3.72e-101
chr1-170	chr1	34696681	34696813	11.72	5.15e-24
chr1-1700	chr1	158364653	158364785	23.44	3.81e-12
chr1-1702	chr1	158582007	158582139	23.44	3.81e-12
chr1-1703	chr1	159232077	159232209	10.65	5.72e-08
chr1-1704	chr1	160142242	160142374	5.86	4.62e-06
chr1-1706	chr1	161379762	161379894	21.31	8.93e-11
chr1-1708	chr1	161607778	161607910	21.31	8.93e-11
chr1-1709	chr1	162589602	162589734	23.44	3.81e-12
chr1-171	chr1	36244227	36244359	17.05	3.48e-28
chr1-1712	chr1	164275554	164275686	10.65	5.72e-08
chr1-1714	chr1	164397747	164397879	21.31	8.93e-11
chr1-1715	chr1	164899034	164899166	23.44	3.81e-12
chr1-1716	chr1	165104775	165104907	23.44	3.81e-12
chr1-1717	chr1	165187513	165187645	11.72	4.88e-09
chr1-1718	chr1	165498967	165499099	21.31	8.93e-11
chr1-172	chr1	37332897	37333029	18.65	5.83e-32
chr1-1721	chr1	166024105	166024237	5.86	4.62e-06
chr1-1722	chr1	166402219	166402351	23.44	3.81e-12
chr1-1723	chr1	167212386	167212518	5.33	2.75e-05
chr1-1724	chr1	167308435	167308567	5.86	4.62e-06
chr1-1726	chr1	168259099	168259231	11.72	4.88e-09
chr1-1727	chr1	169058839	169058971	5.86	4.62e-06
chr1-1728	chr1	169362589	169362721	25.57	1.49e-13
chr1-1729	chr1	169459522	169459654	5.86	4.62e-06
chr1-1730	chr1	170549196	170549328	23.44	3.81e-12
chr1-1731	chr1	171038176	171038308	23.44	3.81e-12
chr1-1732	chr1	171111382	171111514	23.44	3.81e-12
chr1-1733	chr1	171459947	171460079	11.72	4.88e-09
chr1-1735	chr1	173344123	173344255	9.59	6.09e-07
chr1-1736	chr1	173389950	173390082	11.72	4.88e-09
chr1-1738	chr1	177004200	177004332	21.31	8.93e-11
chr1-1739	chr1	177014414	177014546	10.65	5.72e-08
chr1-174	chr1	88840301	88840433	17.05	3.48e-28
chr1-1740	chr1	177441548	177441680	5.86	4.62e-06
chr1-1742	chr1	179061822	179061954	5.33	2.75e-05
chr1-1743	chr1	179803544	179803676	11.72	4.88e-09
chr1-1745	chr1	180330436	180330568	11.72	4.88e-09
chr1-175	chr1	128472495	128472627	34.1	1.95e-37
chr1-1750	chr1	182053094	182053226	23.44	3.81e-12
chr1-1751	chr1	182125189	182125321	23.44	3.81e-12
chr1-1752	chr1	182341579	182341711	11.72	4.88e-09
chr1-1754	chr1	182951413	182951545	10.65	5.72e-08
chr1-1756	chr1	184462608	184462740	11.72	4.88e-09
chr1-1757	chr1	187331276	187331408	10.65	5.72e-08
chr1-1758	chr1	188468360	188468492	10.65	5.72e-08
chr1-1759	chr1	189688218	189688350	5.33	2.75e-05
chr1-176	chr1	139346836	139346968	17.58	1.98e-29
chr1-1760	chr1	189830789	189830921	19.18	1.9e-09
chr1-1761	chr1	190045906	190046038	5.86	4.62e-06
chr1-1762	chr1	190128822	190128954	5.86	4.62e-06
chr1-1763	chr1	190683281	190683413	11.72	4.88e-09
chr1-1764	chr1	190978673	190978805	10.65	5.72e-08
chr1-1765	chr1	191062925	191063057	21.31	8.93e-11
chr1-1766	chr1	191122888	191123020	21.31	8.93e-11
chr1-1767	chr1	191224859	191224991	5.86	4.62e-06
chr1-1769	chr1	191352931	191353063	21.31	8.93e-11
chr1-177	chr1	161876882	161877014	6.61	8.5e-16
chr1-1771	chr1	191834907	191835039	5.33	2.75e-05
chr1-1772	chr1	192061667	192061799	10.65	5.72e-08
chr1-1775	chr1	193345065	193345197	10.65	5.72e-08
chr1-1777	chr1	193677680	193677812	5.86	4.62e-06
chr1-1778	chr1	194239925	194240057	23.44	3.81e-12
chr1-1779	chr1	194361525	194361657	21.31	8.93e-11
chr1-178	chr1	183072430	183072562	11.72	5.15e-24
chr1-1780	chr1	194658495	194658627	10.65	5.72e-08
chr1-1781	chr1	194897078	194897210	21.31	8.93e-11
chr1-1782	chr1	4571575	4571707	9.59	6.09e-07
chr1-1784	chr1	5015485	5015617	19.18	1.9e-09
chr1-1786	chr1	6483453	6483585	10.65	5.72e-08
chr1-1787	chr1	6805089	6805221	5.33	2.75e-05
chr1-1788	chr1	9570321	9570453	5.33	2.75e-05
chr1-1789	chr1	9611655	9611787	5.33	2.75e-05
chr1-179	chr1	14181639	14181771	34.1	1.95e-37
chr1-1796	chr1	21829789	21829921	19.18	1.9e-09
chr1-1797	chr1	21961338	21961470	21.31	8.93e-11
chr1-1798	chr1	23202997	23203129	21.31	8.93e-11
chr1-18	chr1	64122223	64122355	45.28	9.78e-107
chr1-180	chr1	58445436	58445568	16.52	5.94e-27
chr1-1800	chr1	23762932	23763064	21.31	8.93e-11
chr1-1801	chr1	23764888	23765020	10.65	5.72e-08
chr1-1802	chr1	24005635	24005767	5.33	2.75e-05
chr1-1804	chr1	25824716	25824848	8.52	5.84e-06
chr1-1805	chr1	31154098	31154230	5.33	2.75e-05
chr1-1807	chr1	33932923	33933055	21.31	8.93e-11
chr1-1809	chr1	34700771	34700903	5.33	2.75e-05
chr1-181	chr1	87786401	87786533	12.43	3.41e-26
chr1-1819	chr1	40025900	40026032	19.18	1.9e-09
chr1-182	chr1	89137277	89137409	30.9	7.03e-33
chr1-1820	chr1	42351944	42352076	21.31	8.93e-11
chr1-1826	chr1	44041911	44042043	21.31	8.93e-11
chr1-1827	chr1	44585319	44585451	5.33	2.75e-05
chr1-1829	chr1	51852395	51852527	21.31	8.93e-11
chr1-183	chr1	93210321	93210453	10.65	7.62e-21
chr1-1830	chr1	52280358	52280490	21.31	8.93e-11
chr1-1831	chr1	54666154	54666286	9.59	6.09e-07
chr1-1836	chr1	57751932	57752064	5.33	2.75e-05
chr1-1838	chr1	59037860	59037992	9.59	6.09e-07
chr1-184	chr1	134061277	134061409	34.1	1.95e-37
chr1-1841	chr1	60409660	60409792	9.59	6.09e-07
chr1-1842	chr1	60825956	60826088	21.31	8.93e-11
chr1-1843	chr1	62216078	62216210	17.05	3.65e-08
chr1-1846	chr1	63935062	63935194	17.05	3.65e-08
chr1-185	chr1	171247160	171247292	10.65	7.62e-21
chr1-1851	chr1	66617281	66617413	21.31	8.93e-11
chr1-1854	chr1	71102916	71103048	5.86	4.62e-06
chr1-1855	chr1	71184180	71184312	21.31	8.93e-11
chr1-1857	chr1	71652619	71652751	5.33	2.75e-05
chr1-1858	chr1	72244341	72244473	9.59	6.09e-07
chr1-1859	chr1	72537033	72537165	5.86	4.62e-06
chr1-186	chr1	177640634	177640766	7.46	3.22e-19
chr1-1861	chr1	73153533	73153665	23.44	3.81e-12
chr1-1866	chr1	74317471	74317603	9.59	6.09e-07
chr1-1867	chr1	74397409	74397541	10.65	5.72e-08
chr1-1868	chr1	74538759	74538891	10.65	5.72e-08
chr1-187	chr1	185201206	185201338	6.61	8.5e-16
chr1-1873	chr1	75425872	75426004	9.59	6.09e-07
chr1-1875	chr1	75798832	75798964	10.65	5.72e-08
chr1-1877	chr1	78203883	78204015	5.33	2.75e-05
chr1-188	chr1	194739812	194739944	15.98	9.83e-26
chr1-1880	chr1	80652300	80652432	10.65	5.72e-08
chr1-1881	chr1	81097324	81097456	9.59	6.09e-07
chr1-1882	chr1	81266571	81266703	21.31	8.93e-11
chr1-1883	chr1	81886973	81887105	19.18	1.9e-09
chr1-1885	chr1	83076251	83076383	19.18	1.9e-09
chr1-189	chr1	31059158	31059290	15.98	9.83e-26
chr1-1890	chr1	84560777	84560909	5.33	2.75e-05
chr1-1897	chr1	87389117	87389249	5.33	2.75e-05
chr1-19	chr1	34583891	34584023	168.35	7.71e-144
chr1-190	chr1	36861797	36861929	16.52	5.94e-27
chr1-1900	chr1	88318672	88318804	10.65	5.72e-08
chr1-1906	chr1	89876474	89876606	21.31	8.93e-11
chr1-1908	chr1	90566252	90566384	17.05	3.65e-08
chr1-191	chr1	42686854	42686986	15.45	1.57e-24
chr1-1911	chr1	92057240	92057372	5.33	2.75e-05
chr1-1912	chr1	92635113	92635245	17.05	3.65e-08
chr1-1913	chr1	92647816	92647948	5.33	2.75e-05
chr1-1918	chr1	93695036	93695168	10.65	5.72e-08
chr1-192	chr1	87574930	87575062	15.98	9.83e-26
chr1-1920	chr1	98267453	98267585	21.31	8.93e-11
chr1-1924	chr1	104838951	104839083	5.86	4.62e-06
chr1-1925	chr1	105355672	105355804	10.65	5.72e-08
chr1-1927	chr1	106013858	106013990	9.59	6.09e-07
chr1-193	chr1	90967755	90967887	11.01	6.9e-22
chr1-1932	chr1	106630154	106630286	10.65	5.72e-08
chr1-1937	chr1	120207554	120207686	21.31	8.93e-11
chr1-194	chr1	120142643	120142775	17.05	3.48e-28
chr1-1941	chr1	126925316	126925448	9.59	6.09e-07
chr1-1942	chr1	127537485	127537617	21.31	8.93e-11
chr1-1944	chr1	128304038	128304170	9.59	6.09e-07
chr1-1946	chr1	130699791	130699923	9.59	6.09e-07
chr1-1947	chr1	130875301	130875433	5.86	4.62e-06
chr1-1949	chr1	131135230	131135362	5.33	2.75e-05
chr1-195	chr1	120245977	120246109	33.03	6.66e-36
chr1-1950	chr1	131137278	131137410	10.65	5.72e-08
chr1-1951	chr1	131418141	131418273	21.31	8.93e-11
chr1-1952	chr1	131427373	131427505	10.65	5.72e-08
chr1-1954	chr1	131983004	131983136	5.33	2.75e-05
chr1-1956	chr1	132208292	132208424	21.31	8.93e-11
chr1-1957	chr1	133596776	133596908	9.59	6.09e-07
chr1-196	chr1	128405049	128405181	6.39	5.65e-15
chr1-1961	chr1	134104080	134104212	19.18	1.9e-09
chr1-1963	chr1	134151917	134152049	21.31	8.93e-11
chr1-1964	chr1	134196607	134196739	5.33	2.75e-05
chr1-1966	chr1	134405841	134405973	5.33	2.75e-05
chr1-1969	chr1	135347562	135347694	10.65	5.72e-08
chr1-197	chr1	133661331	133661463	16.52	5.94e-27
chr1-1972	chr1	135645922	135646054	19.18	1.9e-09
chr1-1974	chr1	135917357	135917489	21.31	8.93e-11
chr1-198	chr1	134219640	134219772	11.01	6.9e-22
chr1-1981	chr1	137691336	137691468	19.18	1.9e-09
chr1-1982	chr1	137751788	137751920	5.33	2.75e-05
chr1-1983	chr1	138964125	138964257	9.59	6.09e-07
chr1-1984	chr1	143145758	143145890	19.18	1.9e-09
chr1-1985	chr1	143814059	143814191	5.33	2.75e-05
chr1-1987	chr1	144003635	144003767	21.31	8.93e-11
chr1-1988	chr1	144003971	144004103	9.59	6.09e-07
chr1-199	chr1	137378654	137378786	33.03	6.66e-36
chr1-1990	chr1	150878618	150878750	17.05	3.65e-08
chr1-1993	chr1	151686108	151686240	10.65	5.72e-08
chr1-1995	chr1	151881428	151881560	19.18	1.9e-09
chr1-1996	chr1	151953745	151953877	10.65	5.72e-08
chr1-2	chr1	172349977	172350109	33.03	2.78e-138
chr1-20	chr1	43317278	43317410	42.09	7.05e-97
chr1-200	chr1	183118575	183118707	12.43	3.41e-26
chr1-2004	chr1	153588048	153588180	10.65	5.72e-08
chr1-2005	chr1	153635680	153635812	9.59	6.09e-07
chr1-201	chr1	184066171	184066303	61.8	2.09e-41
chr1-2010	chr1	155109516	155109648	21.31	8.93e-11
chr1-2013	chr1	155790546	155790678	5.33	2.75e-05
chr1-2014	chr1	156183663	156183795	19.18	1.9e-09
chr1-2016	chr1	157047740	157047872	5.33	2.75e-05
chr1-202	chr1	59237322	59237454	11.01	6.9e-22
chr1-2020	chr1	157426217	157426349	10.65	5.72e-08
chr1-2023	chr1	158161654	158161786	10.65	5.72e-08
chr1-2024	chr1	158310607	158310739	21.31	8.93e-11
chr1-2026	chr1	159702182	159702314	19.18	1.9e-09
chr1-2027	chr1	160149644	160149776	21.31	8.93e-11
chr1-2028	chr1	160743363	160743495	9.59	6.09e-07
chr1-203	chr1	64173865	64173997	31.96	2.2e-34
chr1-2030	chr1	163252022	163252154	21.31	8.93e-11
chr1-2031	chr1	163618216	163618348	9.59	6.09e-07
chr1-2033	chr1	165583635	165583767	5.33	2.75e-05
chr1-2034	chr1	165658737	165658869	9.59	6.09e-07
chr1-2036	chr1	166339117	166339249	10.65	5.72e-08
chr1-2037	chr1	166409787	166409919	10.65	5.72e-08
chr1-204	chr1	64853799	64853931	7.72	1.39e-16
chr1-2040	chr1	168432400	168432532	9.59	6.09e-07
chr1-2041	chr1	169460212	169460344	5.33	2.75e-05
chr1-2043	chr1	169934313	169934445	5.33	2.75e-05
chr1-2046	chr1	170721684	170721816	9.59	6.09e-07
chr1-2048	chr1	171263212	171263344	21.31	8.93e-11
chr1-205	chr1	66569821	66569953	33.03	6.66e-36
chr1-2050	chr1	172132380	172132512	10.65	5.72e-08
chr1-2051	chr1	172324784	172324916	21.31	8.93e-11
chr1-2052	chr1	172562705	172562837	21.31	8.93e-11
chr1-2054	chr1	174964221	174964353	17.05	3.65e-08
chr1-2056	chr1	176880309	176880441	21.31	8.93e-11
chr1-2058	chr1	178627159	178627291	21.31	8.93e-11
chr1-2059	chr1	179546827	179546959	10.65	5.72e-08
chr1-206	chr1	73169476	73169608	16.52	5.94e-27
chr1-2060	chr1	179668383	179668515	10.65	5.72e-08
chr1-2061	chr1	179802956	179803088	21.31	8.93e-11
chr1-2062	chr1	179931451	179931583	5.33	2.75e-05
chr1-2065	chr1	180407181	180407313	5.33	2.75e-05
chr1-2067	chr1	180604681	180604813	10.65	5.72e-08
chr1-2068	chr1	180720437	180720569	5.33	2.75e-05
chr1-2069	chr1	180904616	180904748	5.33	2.75e-05
chr1-207	chr1	73864509	73864641	66.06	4.96e-45
chr1-2072	chr1	181793658	181793790	9.59	6.09e-07
chr1-2074	chr1	182115825	182115957	5.33	2.75e-05
chr1-2075	chr1	182282631	182282763	19.18	1.9e-09
chr1-2077	chr1	183947336	183947468	5.33	2.75e-05
chr1-2079	chr1	184906172	184906304	19.18	1.9e-09
chr1-208	chr1	85720405	85720537	15.98	9.83e-26
chr1-2081	chr1	184999914	185000046	21.31	8.93e-11
chr1-2083	chr1	185546556	185546688	5.86	4.62e-06
chr1-2084	chr1	185638736	185638868	10.65	5.72e-08
chr1-2085	chr1	186712914	186713046	19.18	1.9e-09
chr1-2086	chr1	187283008	187283140	23.44	3.81e-12
chr1-209	chr1	119256814	119256946	29.83	2.17e-31
chr1-2095	chr1	192092651	192092783	10.65	5.72e-08
chr1-21	chr1	43358272	43358404	44.75	4.43e-105
chr1-210	chr1	119913114	119913246	10.3	8.15e-20
chr1-2100	chr1	193699015	193699147	17.05	3.65e-08
chr1-2101	chr1	193736339	193736471	21.31	8.93e-11
chr1-2102	chr1	194363268	194363400	9.59	6.09e-07
chr1-2104	chr1	194619775	194619907	9.59	6.09e-07
chr1-2106	chr1	4412601	4412733	8.52	5.84e-06
chr1-2108	chr1	9248588	9248720	19.18	1.9e-09
chr1-2111	chr1	10007387	10007519	19.18	1.9e-09
chr1-2114	chr1	13660604	13660736	19.18	1.9e-09
chr1-2116	chr1	16122825	16122957	7.46	4.98e-05
chr1-2117	chr1	16212654	16212786	8.52	5.84e-06
chr1-2119	chr1	16665112	16665244	17.05	3.65e-08
chr1-212	chr1	127348637	127348769	31.96	2.2e-34
chr1-2121	chr1	20890993	20891125	8.52	5.84e-06
chr1-2122	chr1	21161940	21162072	19.18	1.9e-09
chr1-2125	chr1	24086294	24086426	8.52	5.84e-06
chr1-2127	chr1	24212137	24212269	10.65	5.72e-08
chr1-2128	chr1	25105499	25105631	9.59	6.09e-07
chr1-213	chr1	132727660	132727792	31.96	2.2e-34
chr1-2130	chr1	31101624	31101756	8.52	5.84e-06
chr1-2131	chr1	33334245	33334377	19.18	1.9e-09
chr1-2135	chr1	34298681	34298813	8.52	5.84e-06
chr1-2137	chr1	34677993	34678125	9.59	6.09e-07
chr1-2138	chr1	34867314	34867446	9.59	6.09e-07
chr1-214	chr1	138326353	138326485	14.92	2.44e-23
chr1-2140	chr1	36471723	36471855	9.59	6.09e-07
chr1-2141	chr1	36478267	36478399	19.18	1.9e-09
chr1-2143	chr1	36604435	36604567	19.18	1.9e-09
chr1-2144	chr1	36628778	36628910	17.05	3.65e-08
chr1-2149	chr1	39774199	39774331	19.18	1.9e-09
chr1-215	chr1	153730784	153730916	6.39	5.65e-15
chr1-2155	chr1	43299660	43299792	21.31	8.93e-11
chr1-2156	chr1	45795355	45795487	9.59	6.09e-07
chr1-2158	chr1	51034406	51034538	17.05	3.65e-08
chr1-2159	chr1	51272720	51272852	7.46	4.98e-05
chr1-2160	chr1	51524663	51524795	17.05	3.65e-08
chr1-2161	chr1	51644570	51644702	17.05	3.65e-08
chr1-2165	chr1	53940285	53940417	17.05	3.65e-08
chr1-217	chr1	162000085	162000217	10.65	7.62e-21
chr1-2170	chr1	55505961	55506093	19.18	1.9e-09
chr1-2173	chr1	59247798	59247930	17.05	3.65e-08
chr1-2176	chr1	59734189	59734321	9.59	6.09e-07
chr1-2177	chr1	59887446	59887578	9.59	6.09e-07
chr1-2179	chr1	60567009	60567141	8.52	5.84e-06
chr1-218	chr1	172202387	172202519	63.93	3.27e-43
chr1-2181	chr1	61771318	61771450	19.18	1.9e-09
chr1-2182	chr1	62530085	62530217	9.59	6.09e-07
chr1-2183	chr1	62706896	62707028	19.18	1.9e-09
chr1-2184	chr1	62783426	62783558	8.52	5.84e-06
chr1-2187	chr1	63932662	63932794	8.52	5.84e-06
chr1-2188	chr1	64018767	64018899	14.92	6.22e-07
chr1-2189	chr1	64254125	64254257	8.52	5.84e-06
chr1-219	chr1	180850754	180850886	10.3	8.15e-20
chr1-2192	chr1	64860352	64860484	19.18	1.9e-09
chr1-2195	chr1	65544274	65544406	17.05	3.65e-08
chr1-2197	chr1	66395386	66395518	9.59	6.09e-07
chr1-2199	chr1	66992823	66992955	19.18	1.9e-09
chr1-22	chr1	180848700	180848832	42.09	7.05e-97
chr1-220	chr1	181016608	181016740	10.65	7.62e-21
chr1-2200	chr1	67181328	67181460	9.59	6.09e-07
chr1-2202	chr1	68676622	68676754	9.59	6.09e-07
chr1-2203	chr1	69024938	69025070	9.59	6.09e-07
chr1-2204	chr1	71102613	71102745	19.18	1.9e-09
chr1-2207	chr1	72323055	72323187	17.05	3.65e-08
chr1-221	chr1	181393918	181394050	35.16	5.55e-39
chr1-2215	chr1	74031013	74031145	8.52	5.84e-06
chr1-2218	chr1	74544255	74544387	10.65	5.72e-08
chr1-222	chr1	182398310	182398442	8.52	2.43e-19
chr1-2220	chr1	74763213	74763345	10.65	5.72e-08
chr1-2222	chr1	75168552	75168684	9.59	6.09e-07
chr1-2224	chr1	75653708	75653840	8.52	5.84e-06
chr1-2225	chr1	76641375	76641507	9.59	6.09e-07
chr1-2226	chr1	77128532	77128664	9.59	6.09e-07
chr1-2228	chr1	78215996	78216128	19.18	1.9e-09
chr1-2229	chr1	78590691	78590823	8.52	5.84e-06
chr1-223	chr1	186261669	186261801	8.26	2.08e-18
chr1-2230	chr1	79507036	79507168	14.92	6.22e-07
chr1-2231	chr1	79581465	79581597	17.05	3.65e-08
chr1-2234	chr1	79838086	79838218	19.18	1.9e-09
chr1-2235	chr1	80116012	80116144	17.05	3.65e-08
chr1-2236	chr1	81043345	81043477	19.18	1.9e-09
chr1-224	chr1	186627718	186627850	10.65	7.62e-21
chr1-2247	chr1	87326961	87327093	8.52	5.84e-06
chr1-2248	chr1	87447605	87447737	8.52	5.84e-06
chr1-2249	chr1	87495072	87495204	9.59	6.09e-07
chr1-225	chr1	191183181	191183313	5.33	5.44e-13
chr1-2250	chr1	87853091	87853223	9.59	6.09e-07
chr1-2251	chr1	88301820	88301952	8.52	5.84e-06
chr1-2255	chr1	89102349	89102481	19.18	1.9e-09
chr1-2257	chr1	89171245	89171377	9.59	6.09e-07
chr1-226	chr1	191254526	191254658	10.65	7.62e-21
chr1-2262	chr1	89786482	89786614	19.18	1.9e-09
chr1-2264	chr1	90060771	90060903	9.59	6.09e-07
chr1-2266	chr1	90734201	90734333	9.59	6.09e-07
chr1-227	chr1	193368238	193368370	7.72	1.39e-16
chr1-2270	chr1	92061531	92061663	8.52	5.84e-06
chr1-2274	chr1	92681226	92681358	9.59	6.09e-07
chr1-228	chr1	5232946	5233078	59.67	1.29e-39
chr1-2280	chr1	97661718	97661850	10.65	5.72e-08
chr1-2281	chr1	97843701	97843833	19.18	1.9e-09
chr1-2283	chr1	105355998	105356130	8.52	5.84e-06
chr1-2287	chr1	106231923	106232055	10.65	5.72e-08
chr1-2289	chr1	106870129	106870261	8.52	5.84e-06
chr1-229	chr1	7088680	7088812	10.65	7.62e-21
chr1-2290	chr1	111864401	111864533	8.52	5.84e-06
chr1-2291	chr1	112390001	112390133	17.05	3.65e-08
chr1-2292	chr1	118295153	118295285	9.59	6.09e-07
chr1-2293	chr1	118398981	118399113	17.05	3.65e-08
chr1-2295	chr1	119265647	119265779	8.52	5.84e-06
chr1-2297	chr1	120602387	120602519	19.18	1.9e-09
chr1-2298	chr1	120603417	120603549	8.52	5.84e-06
chr1-2299	chr1	120758195	120758327	9.59	6.09e-07
chr1-23	chr1	104746913	104747045	38.89	3.23e-87
chr1-230	chr1	9659037	9659169	30.9	7.03e-33
chr1-2300	chr1	121309579	121309711	8.52	5.84e-06
chr1-2305	chr1	126933154	126933286	19.18	1.9e-09
chr1-231	chr1	37997229	37997361	6.93	5.83e-14
chr1-2313	chr1	128824296	128824428	19.18	1.9e-09
chr1-2314	chr1	129919523	129919655	17.05	3.65e-08
chr1-2315	chr1	130790139	130790271	8.52	5.84e-06
chr1-2316	chr1	131030402	131030534	5.33	2.75e-05
chr1-2318	chr1	131351776	131351908	8.52	5.84e-06
chr1-2319	chr1	131384415	131384547	17.05	3.65e-08
chr1-232	chr1	66689463	66689595	7.72	1.39e-16
chr1-2321	chr1	131478884	131479016	17.05	3.65e-08
chr1-2326	chr1	131910952	131911084	9.59	6.09e-07
chr1-2328	chr1	132436757	132436889	17.05	3.65e-08
chr1-233	chr1	73744068	73744200	5.97	2.26e-13
chr1-2330	chr1	132640369	132640501	8.52	5.84e-06
chr1-2331	chr1	132845959	132846091	9.59	6.09e-07
chr1-2332	chr1	132880667	132880799	19.18	1.9e-09
chr1-2336	chr1	133101547	133101679	9.59	6.09e-07
chr1-2337	chr1	133171572	133171704	9.59	6.09e-07
chr1-2339	chr1	133423087	133423219	8.52	5.84e-06
chr1-234	chr1	80709366	80709498	6.82	1.24e-16
chr1-2345	chr1	134210273	134210405	19.18	1.9e-09
chr1-2349	chr1	134709145	134709277	8.52	5.84e-06
chr1-235	chr1	90291077	90291209	14.92	2.44e-23
chr1-2353	chr1	135283327	135283459	8.52	5.84e-06
chr1-2354	chr1	135283956	135284088	17.05	3.65e-08
chr1-236	chr1	91250159	91250291	14.92	2.44e-23
chr1-2361	chr1	136055974	136056106	7.46	4.98e-05
chr1-2362	chr1	136070017	136070149	17.05	3.65e-08
chr1-2368	chr1	138963411	138963543	9.59	6.09e-07
chr1-2369	chr1	139079219	139079351	19.18	1.9e-09
chr1-237	chr1	131981778	131981910	14.92	2.44e-23
chr1-2370	chr1	139378929	139379061	9.59	6.09e-07
chr1-2373	chr1	141104069	141104201	9.59	6.09e-07
chr1-2375	chr1	147187407	147187539	19.18	1.9e-09
chr1-2377	chr1	150740959	150741091	9.59	6.09e-07
chr1-2378	chr1	151250929	151251061	9.59	6.09e-07
chr1-238	chr1	151945497	151945629	59.67	1.29e-39
chr1-2382	chr1	153174883	153175015	19.18	1.9e-09
chr1-2385	chr1	153309081	153309213	8.52	5.84e-06
chr1-2386	chr1	153401869	153402001	8.52	5.84e-06
chr1-2387	chr1	153679223	153679355	9.59	6.09e-07
chr1-2388	chr1	153737281	153737413	8.52	5.84e-06
chr1-239	chr1	160906688	160906820	10.3	8.15e-20
chr1-2390	chr1	154661563	154661695	8.52	5.84e-06
chr1-2395	chr1	156719037	156719169	9.59	6.09e-07
chr1-2398	chr1	157519481	157519613	8.52	5.84e-06
chr1-24	chr1	126684161	126684293	39.42	8.2e-89
chr1-240	chr1	165589308	165589440	8.26	2.08e-18
chr1-2400	chr1	158039827	158039959	19.18	1.9e-09
chr1-2402	chr1	159390253	159390385	19.18	1.9e-09
chr1-2403	chr1	159775288	159775420	9.59	6.09e-07
chr1-2404	chr1	160278366	160278498	8.52	5.84e-06
chr1-2407	chr1	162295491	162295623	17.05	3.65e-08
chr1-2408	chr1	162549982	162550114	9.59	6.09e-07
chr1-2409	chr1	162625448	162625580	17.05	3.65e-08
chr1-241	chr1	170136460	170136592	7.72	1.39e-16
chr1-2410	chr1	162729578	162729710	8.52	5.84e-06
chr1-2411	chr1	163640725	163640857	9.59	6.09e-07
chr1-2415	chr1	164814273	164814405	19.18	1.9e-09
chr1-2419	chr1	165934742	165934874	9.59	6.09e-07
chr1-242	chr1	177175555	177175687	31.96	2.2e-34
chr1-2420	chr1	166244328	166244460	8.52	5.84e-06
chr1-2429	chr1	168685125	168685257	19.18	1.9e-09
chr1-243	chr1	177411489	177411621	29.83	2.17e-31
chr1-2433	chr1	171037046	171037178	9.59	6.09e-07
chr1-2434	chr1	171044924	171045056	7.46	4.98e-05
chr1-244	chr1	177555821	177555953	10.65	7.62e-21
chr1-2441	chr1	172220581	172220713	9.59	6.09e-07
chr1-2443	chr1	175308713	175308845	19.18	1.9e-09
chr1-2445	chr1	176355511	176355643	17.05	3.65e-08
chr1-2446	chr1	177307844	177307976	8.52	5.84e-06
chr1-2448	chr1	178369457	178369589	9.59	6.09e-07
chr1-245	chr1	178318214	178318346	14.92	2.44e-23
chr1-2451	chr1	179106799	179106931	8.52	5.84e-06
chr1-2455	chr1	181352629	181352761	19.18	1.9e-09
chr1-246	chr1	181888927	181889059	6.18	3.63e-14
chr1-2463	chr1	182376335	182376467	8.52	5.84e-06
chr1-247	chr1	39749815	39749947	7.19	8.06e-15
chr1-2470	chr1	185964681	185964813	9.59	6.09e-07
chr1-2471	chr1	186399836	186399968	8.52	5.84e-06
chr1-2474	chr1	189291042	189291174	7.46	4.98e-05
chr1-2475	chr1	189887631	189887763	8.52	5.84e-06
chr1-2476	chr1	189973163	189973295	9.59	6.09e-07
chr1-2479	chr1	190911665	190911797	5.33	2.75e-05
chr1-248	chr1	43164013	43164145	28.77	6.48e-30
chr1-2482	chr1	191469321	191469453	8.52	5.84e-06
chr1-2483	chr1	191495175	191495307	17.05	3.65e-08
chr1-2486	chr1	194004240	194004372	19.18	1.9e-09
chr1-2488	chr1	194578446	194578578	9.59	6.09e-07
chr1-249	chr1	43730663	43730795	5.97	2.26e-13
chr1-2492	chr1	195176701	195176833	17.05	3.65e-08
chr1-25	chr1	135159243	135159375	20.51	2.93e-71
chr1-250	chr1	57428980	57429112	28.77	6.48e-30
chr1-251	chr1	58030666	58030798	7.19	8.06e-15
chr1-252	chr1	59912917	59913049	7.19	8.06e-15
chr1-253	chr1	72826483	72826615	6.18	3.63e-14
chr1-254	chr1	79697526	79697658	28.77	6.48e-30
chr1-255	chr1	87891783	87891915	4.26	4.62e-10
chr1-256	chr1	126865636	126865768	4.11	1.99e-09
chr1-257	chr1	128595595	128595727	31.96	2.2e-34
chr1-258	chr1	152592874	152593006	14.92	2.44e-23
chr1-259	chr1	157440494	157440626	29.83	2.17e-31
chr1-26	chr1	154102993	154103125	19.18	9.34e-65
chr1-260	chr1	162570458	162570590	9.59	8.4e-18
chr1-261	chr1	171329194	171329326	5.75	1.36e-12
chr1-262	chr1	177339003	177339135	15.45	1.57e-24
chr1-263	chr1	180365226	180365358	5.75	1.36e-12
chr1-264	chr1	185362791	185362923	15.45	1.57e-24
chr1-265	chr1	194019435	194019567	9.59	8.4e-18
chr1-266	chr1	5229008	5229140	6.66	4.06e-13
chr1-267	chr1	39759650	39759782	5.33	4.39e-11
chr1-268	chr1	41027650	41027782	28.77	6.48e-30
chr1-269	chr1	75559635	75559767	4.97	1.51e-11
chr1-27	chr1	91414216	91414348	37.29	1.83e-82
chr1-270	chr1	81281096	81281228	28.77	6.48e-30
chr1-271	chr1	92787241	92787373	5.75	1.36e-12
chr1-272	chr1	127773923	127774055	8.88	7.51e-16
chr1-273	chr1	134062779	134062911	7.46	1.08e-15
chr1-274	chr1	134557007	134557139	14.38	3.65e-22
chr1-275	chr1	153202307	153202439	4.11	1.99e-09
chr1-276	chr1	154150207	154150339	14.38	3.65e-22
chr1-277	chr1	155063017	155063149	9.59	8.4e-18
chr1-278	chr1	157447289	157447421	27.7	1.86e-28
chr1-279	chr1	160213019	160213151	5.97	2.26e-13
chr1-28	chr1	155212667	155212799	26.99	4.85e-79
chr1-280	chr1	163403634	163403766	26.64	5.16e-27
chr1-281	chr1	169484765	169484897	51.14	1.31e-32
chr1-282	chr1	172048599	172048731	29.83	2.17e-31
chr1-283	chr1	183792336	183792468	53.27	2.46e-34
chr1-284	chr1	184034052	184034184	14.92	2.44e-23
chr1-285	chr1	39941992	39942124	6.66	4.06e-13
chr1-286	chr1	51915160	51915292	12.79	9.76e-19
chr1-287	chr1	52113836	52113968	28.77	6.48e-30
chr1-288	chr1	59795487	59795619	29.83	2.17e-31
chr1-289	chr1	79439980	79440112	6.93	5.83e-14
chr1-29	chr1	188118269	188118401	15.98	8.95e-62
chr1-290	chr1	88707755	88707887	6.66	4.06e-13
chr1-291	chr1	90288937	90289069	9.59	8.4e-18
chr1-292	chr1	91055735	91055867	7.19	8.06e-15
chr1-293	chr1	128578521	128578653	13.85	5.26e-21
chr1-294	chr1	135375498	135375630	6.93	5.83e-14
chr1-295	chr1	152214542	152214674	7.19	8.06e-15
chr1-296	chr1	155099523	155099655	4.11	1.99e-09
chr1-297	chr1	167082893	167083025	26.64	5.16e-27
chr1-298	chr1	170644413	170644545	13.85	5.26e-21
chr1-299	chr1	172203300	172203432	13.85	5.26e-21
chr1-3	chr1	192834783	192834915	283.42	8.37e-271
chr1-30	chr1	132222315	132222447	9.32	9.93e-43
chr1-300	chr1	177150641	177150773	28.77	6.48e-30
chr1-301	chr1	182475071	182475203	13.85	5.26e-21
chr1-302	chr1	186749283	186749415	6.39	2.72e-12
chr1-303	chr1	189645092	189645224	9.23	8.09e-17
chr1-304	chr1	190682598	190682730	6.66	4.06e-13
chr1-305	chr1	193189461	193189593	11.72	1.54e-16
chr1-306	chr1	16656772	16656904	6.39	2.72e-12
chr1-307	chr1	34666388	34666520	13.85	5.26e-21
chr1-308	chr1	36596247	36596379	8.52	6.7e-15
chr1-309	chr1	39936612	39936744	26.64	5.16e-27
chr1-31	chr1	169093668	169093800	35.69	9.08e-78
chr1-310	chr1	51315593	51315725	24.51	3.52e-24
chr1-311	chr1	64839372	64839504	51.14	1.31e-32
chr1-312	chr1	66321639	66321771	26.64	5.16e-27
chr1-313	chr1	72069133	72069265	12.25	1.25e-17
chr1-314	chr1	74295848	74295980	4.26	7.68e-09
chr1-315	chr1	80384331	80384463	53.27	2.46e-34
chr1-316	chr1	84621410	84621542	6.13	1.75e-11
chr1-317	chr1	88562511	88562643	6.39	2.72e-12
chr1-318	chr1	90228470	90228602	5.33	4.39e-11
chr1-319	chr1	106171475	106171607	12.25	1.25e-17
chr1-32	chr1	91459499	91459631	69.26	7.68e-94
chr1-320	chr1	121315118	121315250	13.32	7.31e-20
chr1-321	chr1	127107632	127107764	12.79	9.76e-19
chr1-322	chr1	131473749	131473881	12.25	1.25e-17
chr1-323	chr1	131555274	131555406	55.41	4.44e-36
chr1-324	chr1	133046053	133046185	8.52	6.7e-15
chr1-325	chr1	134048814	134048946	25.57	1.38e-25
chr1-326	chr1	134079033	134079165	25.57	1.38e-25
chr1-327	chr1	134245155	134245287	13.85	5.26e-21
chr1-328	chr1	137591408	137591540	24.51	3.52e-24
chr1-329	chr1	153899879	153900011	25.57	1.38e-25
chr1-33	chr1	189187823	189187955	75.65	5.09e-105
chr1-331	chr1	156035993	156036125	8.52	6.7e-15
chr1-332	chr1	159661326	159661458	12.79	9.76e-19
chr1-333	chr1	163339019	163339151	9.23	8.09e-17
chr1-334	chr1	166280759	166280891	6.66	4.06e-13
chr1-335	chr1	167284408	167284540	8.52	6.7e-15
chr1-336	chr1	170655590	170655722	51.14	1.31e-32
chr1-337	chr1	172376305	172376437	51.14	1.31e-32
chr1-338	chr1	179042186	179042318	13.32	7.31e-20
chr1-339	chr1	179546207	179546339	8.88	7.51e-16
chr1-34	chr1	194629432	194629564	12.08	1.73e-48
chr1-340	chr1	181484799	181484931	8.17	5.74e-14
chr1-341	chr1	184034469	184034601	8.52	6.7e-15
chr1-342	chr1	190137995	190138127	9.23	8.09e-17
chr1-343	chr1	191785275	191785407	12.79	9.76e-19
chr1-344	chr1	191990119	191990251	49.01	6.7e-31
chr1-345	chr1	193238533	193238665	8.88	7.51e-16
chr1-346	chr1	193386369	193386501	27.7	1.86e-28
chr1-347	chr1	14292434	14292566	23.44	8.62e-23
chr1-348	chr1	33042615	33042747	51.14	1.31e-32
chr1-349	chr1	39701456	39701588	53.27	2.46e-34
chr1-35	chr1	86434499	86434631	151.3	3.45e-126
chr1-350	chr1	39947778	39947910	8.17	5.74e-14
chr1-351	chr1	42920919	42921051	7.81	4.71e-13
chr1-352	chr1	56833396	56833528	12.25	1.25e-17
chr1-353	chr1	66386826	66386958	12.25	1.25e-17
chr1-354	chr1	72379874	72380006	24.51	3.52e-24
chr1-355	chr1	74332616	74332748	25.57	1.38e-25
chr1-356	chr1	75180099	75180231	8.52	6.7e-15
chr1-358	chr1	87607917	87608049	12.25	1.25e-17
chr1-36	chr1	86487516	86487648	23.44	5.39e-65
chr1-360	chr1	104769332	104769464	8.52	6.7e-15
chr1-361	chr1	118982619	118982751	8.17	5.74e-14
chr1-362	chr1	119050002	119050134	51.14	1.31e-32
chr1-364	chr1	152792962	152793094	6.39	2.72e-12
chr1-365	chr1	153192048	153192180	25.57	1.38e-25
chr1-366	chr1	155233893	155234025	5.11	2.36e-10
chr1-367	chr1	157554267	157554399	12.79	9.76e-19
chr1-368	chr1	162643831	162643963	12.25	1.25e-17
chr1-369	chr1	169986328	169986460	8.17	5.74e-14
chr1-37	chr1	156998021	156998153	23.09	1.26e-63
chr1-370	chr1	172017013	172017145	25.57	1.38e-25
chr1-371	chr1	172482137	172482269	25.57	1.38e-25
chr1-372	chr1	177447686	177447818	53.27	2.46e-34
chr1-373	chr1	180312731	180312863	12.25	1.25e-17
chr1-374	chr1	182918875	182919007	9.23	8.09e-17
chr1-375	chr1	194978226	194978358	12.25	1.25e-17
chr1-376	chr1	9630460	9630592	22.38	2.02e-21
chr1-377	chr1	37122417	37122549	4.9	1.22e-09
chr1-378	chr1	39977491	39977623	4.08	3.31e-08
chr1-379	chr1	57388028	57388160	11.72	1.54e-16
chr1-38	chr1	172027352	172027484	23.8	2.26e-66
chr1-380	chr1	64196189	64196321	12.25	1.25e-17
chr1-381	chr1	64690537	64690669	4.26	1.3e-07
chr1-382	chr1	65179219	65179351	5.59	6.4e-10
chr1-383	chr1	73642886	73643018	22.38	2.02e-21
chr1-384	chr1	76283480	76283612	13.32	7.31e-20
chr1-385	chr1	79832840	79832972	44.75	1.54e-27
chr1-386	chr1	85969594	85969726	24.51	3.52e-24
chr1-387	chr1	86742904	86743036	7.46	3.71e-12
chr1-388	chr1	87213745	87213877	11.72	1.54e-16
chr1-389	chr1	89424784	89424916	5.59	6.4e-10
chr1-39	chr1	34665364	34665496	9.89	2.61e-41
chr1-390	chr1	90279152	90279284	25.57	1.38e-25
chr1-391	chr1	91525985	91526117	23.44	8.62e-23
chr1-392	chr1	106071352	106071484	51.14	1.31e-32
chr1-393	chr1	114330654	114330786	6.13	1.75e-11
chr1-394	chr1	132200738	132200870	5.86	1.08e-10
chr1-395	chr1	132477026	132477158	12.25	1.25e-17
chr1-396	chr1	135781300	135781432	11.72	1.54e-16
chr1-397	chr1	136140316	136140448	24.51	3.52e-24
chr1-398	chr1	152461973	152462105	12.25	1.25e-17
chr1-399	chr1	153900469	153900601	6.66	4.06e-13
chr1-4	chr1	54250568	54250700	38	6.37e-126
chr1-40	chr1	153084223	153084355	31.43	1.56e-65
chr1-400	chr1	155210051	155210183	8.17	5.74e-14
chr1-402	chr1	167270067	167270199	7.46	3.71e-12
chr1-403	chr1	177447168	177447300	51.14	1.31e-32
chr1-404	chr1	177623502	177623634	13.32	7.31e-20
chr1-405	chr1	180641302	180641434	11.72	1.54e-16
chr1-406	chr1	183574020	183574152	8.52	6.7e-15
chr1-407	chr1	193173475	193173607	23.44	8.62e-23
chr1-408	chr1	14180418	14180550	12.25	1.25e-17
chr1-409	chr1	14218961	14219093	11.19	1.81e-15
chr1-41	chr1	153703510	153703642	16.78	1.96e-53
chr1-410	chr1	20678074	20678206	7.1	2.78e-11
chr1-411	chr1	34011372	34011504	7.1	2.78e-11
chr1-412	chr1	36636586	36636718	5.86	1.08e-10
chr1-413	chr1	36647776	36647908	4.69	6.03e-09
chr1-414	chr1	39900649	39900781	11.19	1.81e-15
chr1-415	chr1	40117622	40117754	10.12	2.18e-13
chr1-416	chr1	41605910	41606042	11.72	1.54e-16
chr1-417	chr1	41652755	41652887	11.72	1.54e-16
chr1-418	chr1	52597357	52597489	11.72	1.54e-16
chr1-419	chr1	64848235	64848367	8.17	5.74e-14
chr1-420	chr1	66816961	66817093	12.25	1.25e-17
chr1-421	chr1	73944489	73944621	12.25	1.25e-17
chr1-422	chr1	80340966	80341098	6.39	2.72e-12
chr1-423	chr1	86359310	86359442	4.69	6.03e-09
chr1-424	chr1	87879951	87880083	5.59	6.4e-10
chr1-425	chr1	87892632	87892764	7.81	4.71e-13
chr1-426	chr1	89070145	89070277	11.19	1.81e-15
chr1-427	chr1	89517909	89518041	5.86	1.08e-10
chr1-428	chr1	89860417	89860549	7.46	3.71e-12
chr1-429	chr1	92100690	92100822	7.46	3.71e-12
chr1-43	chr1	169467995	169468127	23.44	5.39e-65
chr1-430	chr1	93085247	93085379	5.59	6.4e-10
chr1-431	chr1	97770052	97770184	8.17	5.74e-14
chr1-432	chr1	116366926	116367058	7.81	4.71e-13
chr1-433	chr1	121112005	121112137	7.1	2.78e-11
chr1-434	chr1	126830440	126830572	22.38	2.02e-21
chr1-435	chr1	126830799	126830931	22.38	2.02e-21
chr1-436	chr1	131431941	131432073	12.25	1.25e-17
chr1-438	chr1	132881507	132881639	42.62	6.89e-26
chr1-439	chr1	136120056	136120188	22.38	2.02e-21
chr1-44	chr1	9564567	9564699	34.1	3.95e-73
chr1-440	chr1	150759621	150759753	8.17	5.74e-14
chr1-441	chr1	157039045	157039177	5.59	6.4e-10
chr1-442	chr1	159741952	159742084	4.26	1.3e-07
chr1-443	chr1	161969158	161969290	7.81	4.71e-13
chr1-445	chr1	178449320	178449452	7.81	4.71e-13
chr1-446	chr1	7396991	7397123	5.86	1.08e-10
chr1-447	chr1	7397890	7398022	5.33	3.62e-09
chr1-448	chr1	21084808	21084940	7.46	3.71e-12
chr1-449	chr1	34167328	34167460	4.05	5.6e-07
chr1-45	chr1	113358422	113358554	33.03	4.53e-70
chr1-450	chr1	35653329	35653461	42.62	6.89e-26
chr1-451	chr1	36369120	36369252	5.33	3.62e-09
chr1-452	chr1	52845165	52845297	10.65	2.04e-14
chr1-453	chr1	55088050	55088182	22.38	2.02e-21
chr1-454	chr1	57224850	57224982	5.59	6.4e-10
chr1-455	chr1	59423306	59423438	10.65	2.04e-14
chr1-456	chr1	59482024	59482156	10.65	2.04e-14
chr1-457	chr1	61530348	61530480	22.38	2.02e-21
chr1-458	chr1	63763527	63763659	7.46	3.71e-12
chr1-459	chr1	63764132	63764264	7.46	3.71e-12
chr1-46	chr1	155083266	155083398	21.31	7.11e-57
chr1-460	chr1	63828568	63828700	44.75	1.54e-27
chr1-461	chr1	66227022	66227154	10.12	2.18e-13
chr1-462	chr1	73942332	73942464	6.39	1.36e-09
chr1-463	chr1	74386880	74387012	6.75	1.99e-10
chr1-464	chr1	74506669	74506801	7.46	3.71e-12
chr1-465	chr1	74542529	74542661	7.46	3.71e-12
chr1-466	chr1	74588189	74588321	10.65	2.04e-14
chr1-467	chr1	75192109	75192241	44.75	1.54e-27
chr1-468	chr1	75521737	75521869	7.46	3.71e-12
chr1-469	chr1	80018731	80018863	10.65	2.04e-14
chr1-47	chr1	161070691	161070823	13.21	1.34e-46
chr1-470	chr1	82316544	82316676	10.65	2.04e-14
chr1-471	chr1	83907027	83907159	11.19	1.81e-15
chr1-472	chr1	85917087	85917219	22.38	2.02e-21
chr1-473	chr1	86053367	86053499	5.06	1.95e-08
chr1-474	chr1	87273655	87273787	11.19	1.81e-15
chr1-475	chr1	89228560	89228692	44.75	1.54e-27
chr1-477	chr1	91211308	91211440	7.46	3.71e-12
chr1-478	chr1	91458229	91458361	22.38	2.02e-21
chr1-479	chr1	97660715	97660847	7.1	2.78e-11
chr1-48	chr1	178318704	178318836	123.6	2.33e-98
chr1-480	chr1	121327859	121327991	7.46	3.71e-12
chr1-481	chr1	126024577	126024709	5.33	3.62e-09
chr1-482	chr1	126925654	126925786	5.86	1.08e-10
chr1-483	chr1	133178787	133178919	36.23	4.56e-21
chr1-484	chr1	136332001	136332133	4.05	5.6e-07
chr1-485	chr1	136362703	136362835	10.65	2.04e-14
chr1-486	chr1	143989922	143990054	42.62	6.89e-26
chr1-487	chr1	152439975	152440107	42.62	6.89e-26
chr1-488	chr1	154500562	154500694	10.65	2.04e-14
chr1-49	chr1	36556623	36556755	61.8	4.2e-81
chr1-490	chr1	155056242	155056374	5.06	1.95e-08
chr1-491	chr1	158464129	158464261	4.05	5.6e-07
chr1-493	chr1	180215209	180215341	5.59	6.4e-10
chr1-494	chr1	180987888	180988020	4.48	2.86e-08
chr1-495	chr1	181144201	181144333	22.38	2.02e-21
chr1-496	chr1	187052643	187052775	22.38	2.02e-21
chr1-497	chr1	190402083	190402215	44.75	1.54e-27
chr1-498	chr1	191808751	191808883	5.59	6.4e-10
chr1-499	chr1	13005215	13005347	19.18	1.95e-17
chr1-5	chr1	90975042	90975174	236.54	1.2e-217
chr1-50	chr1	46853701	46853833	16.52	3.3e-52
chr1-500	chr1	21830196	21830328	7.46	3.71e-12
chr1-501	chr1	25228717	25228849	21.31	4.52e-20
chr1-502	chr1	36492466	36492598	5.33	3.62e-09
chr1-503	chr1	37350905	37351037	21.31	4.52e-20
chr1-504	chr1	38334311	38334443	21.31	4.52e-20
chr1-505	chr1	38848174	38848306	20.24	9.64e-19
chr1-506	chr1	39918691	39918823	21.31	4.52e-20
chr1-508	chr1	43098347	43098479	11.19	1.81e-15
chr1-509	chr1	52718188	52718320	19.18	1.95e-17
chr1-51	chr1	86442587	86442719	129.99	1.12e-104
chr1-510	chr1	53823921	53824053	21.31	4.52e-20
chr1-511	chr1	55027547	55027679	7.46	3.71e-12
chr1-512	chr1	55161258	55161390	21.31	4.52e-20
chr1-513	chr1	55405715	55405847	21.31	4.52e-20
chr1-514	chr1	56972629	56972761	10.12	2.18e-13
chr1-517	chr1	64220620	64220752	21.31	4.52e-20
chr1-518	chr1	66177887	66178019	21.31	4.52e-20
chr1-519	chr1	66655205	66655337	21.31	4.52e-20
chr1-52	chr1	86504180	86504312	30.37	1.51e-62
chr1-520	chr1	67038790	67038922	6.75	1.99e-10
chr1-521	chr1	67397865	67397997	20.24	9.64e-19
chr1-522	chr1	86587060	86587192	9.59	2.22e-12
chr1-523	chr1	88424771	88424903	7.46	3.71e-12
chr1-524	chr1	89934761	89934893	21.31	4.52e-20
chr1-526	chr1	92180481	92180613	6.39	1.36e-09
chr1-527	chr1	92934258	92934390	4.53	4.85e-07
chr1-528	chr1	118388857	118388989	10.65	2.04e-14
chr1-529	chr1	119533548	119533680	10.12	2.18e-13
chr1-53	chr1	106202091	106202223	33.03	4.53e-70
chr1-530	chr1	127368882	127369014	44.75	1.54e-27
chr1-531	chr1	128285289	128285421	40.49	2.94e-24
chr1-532	chr1	130462448	130462580	9.59	2.22e-12
chr1-533	chr1	131438166	131438298	6.39	1.36e-09
chr1-534	chr1	132333891	132334023	5.06	1.95e-08
chr1-535	chr1	133397861	133397993	4.26	1.3e-07
chr1-536	chr1	135188363	135188495	7.1	2.78e-11
chr1-537	chr1	135549028	135549160	7.1	2.78e-11
chr1-538	chr1	141097656	141097788	7.1	2.78e-11
chr1-539	chr1	143820619	143820751	42.62	6.89e-26
chr1-54	chr1	5022974	5023106	19.89	1.33e-51
chr1-540	chr1	153014516	153014648	4.26	1.3e-07
chr1-541	chr1	154156863	154156995	21.31	4.52e-20
chr1-542	chr1	159413523	159413655	40.49	2.94e-24
chr1-543	chr1	159494375	159494507	10.12	2.18e-13
chr1-544	chr1	162108249	162108381	7.1	2.78e-11
chr1-545	chr1	165320647	165320779	5.33	3.62e-09
chr1-546	chr1	165736273	165736405	4.48	2.86e-08
chr1-547	chr1	165935142	165935274	20.24	9.64e-19
chr1-548	chr1	167240053	167240185	19.18	1.95e-17
chr1-549	chr1	167270517	167270649	10.65	2.04e-14
chr1-55	chr1	9649329	9649461	10.12	5.96e-37
chr1-551	chr1	177796697	177796829	10.65	2.04e-14
chr1-552	chr1	179041918	179042050	42.62	6.89e-26
chr1-553	chr1	180390454	180390586	10.12	2.18e-13
chr1-554	chr1	180942171	180942303	10.65	2.04e-14
chr1-555	chr1	181272986	181273118	4.26	1.3e-07
chr1-556	chr1	182086883	182087015	6.75	1.99e-10
chr1-557	chr1	189731798	189731930	19.18	1.95e-17
chr1-558	chr1	190079978	190080110	10.12	2.18e-13
chr1-559	chr1	190190338	190190470	21.31	4.52e-20
chr1-56	chr1	162832285	162832417	60.73	2.6e-79
chr1-560	chr1	190928453	190928585	7.46	3.71e-12
chr1-561	chr1	191575925	191576057	20.24	9.64e-19
chr1-562	chr1	191821355	191821487	7.1	2.78e-11
chr1-563	chr1	194808392	194808524	7.1	2.78e-11
chr1-564	chr1	194878523	194878655	10.65	2.04e-14
chr1-565	chr1	9748346	9748478	6.75	1.99e-10
chr1-566	chr1	13861162	13861294	21.31	4.52e-20
chr1-567	chr1	35605367	35605499	18.11	3.74e-16
chr1-568	chr1	36030583	36030715	10.12	2.18e-13
chr1-569	chr1	36064993	36065125	6.75	1.99e-10
chr1-57	chr1	180933808	180933940	61.8	4.2e-81
chr1-570	chr1	36528459	36528591	36.23	4.56e-21
chr1-571	chr1	36547337	36547469	4.05	5.6e-07
chr1-572	chr1	36939871	36940003	6.39	1.36e-09
chr1-573	chr1	37220208	37220340	9.59	2.22e-12
chr1-574	chr1	38987557	38987689	6.39	1.36e-09
chr1-575	chr1	43264582	43264714	6.75	1.99e-10
chr1-576	chr1	44147925	44148057	21.31	4.52e-20
chr1-577	chr1	50927516	50927648	4.79	9.97e-08
chr1-578	chr1	51216350	51216482	19.18	1.95e-17
chr1-579	chr1	51478363	51478495	18.11	3.74e-16
chr1-58	chr1	92212114	92212246	58.6	9.41e-76
chr1-580	chr1	55201920	55202052	4.53	4.85e-07
chr1-581	chr1	59670736	59670868	7.1	2.78e-11
chr1-582	chr1	62743467	62743599	19.18	1.95e-17
chr1-584	chr1	64617135	64617267	5.33	3.62e-09
chr1-585	chr1	72720543	72720675	5.33	3.62e-09
chr1-586	chr1	73787740	73787872	40.49	2.94e-24
chr1-587	chr1	75317743	75317875	18.11	3.74e-16
chr1-588	chr1	78649367	78649499	40.49	2.94e-24
chr1-589	chr1	78725897	78726029	5.33	3.62e-09
chr1-59	chr1	104838267	104838399	119.33	3.5e-94
chr1-590	chr1	84696253	84696385	20.24	9.64e-19
chr1-593	chr1	91600705	91600837	4.53	4.85e-07
chr1-594	chr1	92100364	92100496	9.59	2.22e-12
chr1-595	chr1	98190332	98190464	21.31	4.52e-20
chr1-596	chr1	106428340	106428472	6.39	1.36e-09
chr1-597	chr1	106796637	106796769	10.12	2.18e-13
chr1-598	chr1	118694608	118694740	20.24	9.64e-19
chr1-599	chr1	119453891	119454023	10.12	2.18e-13
chr1-6	chr1	194747008	194747140	53.27	3.72e-132
chr1-60	chr1	106199745	106199877	117.2	4.18e-92
chr1-600	chr1	131658171	131658303	9.06	2.14e-11
chr1-602	chr1	132322807	132322939	17.05	6.78e-15
chr1-603	chr1	133131192	133131324	6.39	1.36e-09
chr1-604	chr1	135686910	135687042	6.04	8.75e-09
chr1-605	chr1	137928047	137928179	10.12	2.18e-13
chr1-606	chr1	153487523	153487655	6.75	1.99e-10
chr1-607	chr1	155049125	155049257	10.12	2.18e-13
chr1-608	chr1	156040827	156040959	19.18	1.95e-17
chr1-609	chr1	159594350	159594482	9.06	2.14e-11
chr1-61	chr1	166282764	166282896	9.77	6.02e-35
chr1-610	chr1	165643167	165643299	5.59	6.4e-10
chr1-612	chr1	171380042	171380174	19.18	1.95e-17
chr1-613	chr1	171503343	171503475	38.36	1.19e-22
chr1-614	chr1	175128534	175128666	19.18	1.95e-17
chr1-615	chr1	176994302	176994434	5.06	1.95e-08
chr1-616	chr1	177444540	177444672	7.46	3.71e-12
chr1-617	chr1	179803872	179804004	4.53	4.85e-07
chr1-618	chr1	180387608	180387740	10.12	2.18e-13
chr1-619	chr1	181211920	181212052	6.39	1.36e-09
chr1-62	chr1	43698673	43698805	29.3	1.37e-59
chr1-620	chr1	187975543	187975675	6.75	1.99e-10
chr1-621	chr1	188729345	188729477	38.36	1.19e-22
chr1-622	chr1	191435480	191435612	9.06	2.14e-11
chr1-623	chr1	194223155	194223287	10.12	2.18e-13
chr1-624	chr1	194682131	194682263	7.1	2.78e-11
chr1-625	chr1	5083002	5083134	4.79	9.97e-08
chr1-626	chr1	10037790	10037922	17.05	6.78e-15
chr1-627	chr1	16519715	16519847	10.12	2.18e-13
chr1-628	chr1	39944724	39944856	9.59	2.22e-12
chr1-63	chr1	152556345	152556477	11.72	6.67e-39
chr1-630	chr1	43933799	43933931	6.39	1.36e-09
chr1-631	chr1	52119314	52119446	8.52	1.95e-10
chr1-632	chr1	52630613	52630745	4.79	9.97e-08
chr1-633	chr1	52758305	52758437	36.23	4.56e-21
chr1-635	chr1	59625557	59625689	5.06	1.95e-08
chr1-636	chr1	61181192	61181324	6.04	8.75e-09
chr1-637	chr1	62749783	62749915	18.11	3.74e-16
chr1-638	chr1	62934332	62934464	6.39	1.36e-09
chr1-639	chr1	64143201	64143333	9.06	2.14e-11
chr1-64	chr1	153037820	153037952	119.33	3.5e-94
chr1-640	chr1	67359884	67360016	18.11	3.74e-16
chr1-641	chr1	72229132	72229264	34.1	1.65e-19
chr1-643	chr1	73850724	73850856	18.11	3.74e-16
chr1-644	chr1	74661693	74661825	10.12	2.18e-13
chr1-645	chr1	75142657	75142789	6.04	8.75e-09
chr1-646	chr1	76535630	76535762	38.36	1.19e-22
chr1-647	chr1	80225023	80225155	6.39	1.36e-09
chr1-648	chr1	86178972	86179104	9.06	2.14e-11
chr1-649	chr1	87142534	87142666	9.06	2.14e-11
chr1-65	chr1	92137227	92137359	14.92	5.25e-45
chr1-650	chr1	88699128	88699260	38.36	1.19e-22
chr1-651	chr1	89041346	89041478	19.18	1.95e-17
chr1-653	chr1	91062436	91062568	6.39	1.36e-09
chr1-654	chr1	91098983	91099115	4.53	4.85e-07
chr1-655	chr1	91483445	91483577	34.1	1.65e-19
chr1-657	chr1	106403137	106403269	17.05	6.78e-15
chr1-658	chr1	113633377	113633509	18.11	3.74e-16
chr1-659	chr1	120357464	120357596	5.68	5.34e-08
chr1-66	chr1	119255554	119255686	13.58	3.25e-39
chr1-661	chr1	125560789	125560921	9.06	2.14e-11
chr1-662	chr1	128551852	128551984	9.06	2.14e-11
chr1-663	chr1	128586284	128586416	19.18	1.95e-17
chr1-664	chr1	131378947	131379079	34.1	1.65e-19
chr1-665	chr1	131910245	131910377	38.36	1.19e-22
chr1-666	chr1	132417292	132417424	4.79	9.97e-08
chr1-667	chr1	133188081	133188213	6.39	1.36e-09
chr1-668	chr1	133393326	133393458	19.18	1.95e-17
chr1-669	chr1	133610269	133610401	6.39	1.36e-09
chr1-67	chr1	158386988	158387120	115.07	4.89e-90
chr1-670	chr1	134962451	134962583	9.06	2.14e-11
chr1-671	chr1	135280832	135280964	4.79	9.97e-08
chr1-672	chr1	135670533	135670665	8.52	1.95e-10
chr1-674	chr1	151428569	151428701	10.12	2.18e-13
chr1-675	chr1	151755125	151755257	18.11	3.74e-16
chr1-676	chr1	151878542	151878674	38.36	1.19e-22
chr1-677	chr1	153014804	153014936	36.23	4.56e-21
chr1-678	chr1	155025936	155026068	17.05	6.78e-15
chr1-679	chr1	155092527	155092659	18.11	3.74e-16
chr1-68	chr1	42539046	42539178	13.58	3.25e-39
chr1-680	chr1	157412586	157412718	5.68	5.34e-08
chr1-681	chr1	160370661	160370793	4.26	2.23e-06
chr1-682	chr1	161131454	161131586	4.05	5.6e-07
chr1-683	chr1	164704803	164704935	10.12	2.18e-13
chr1-684	chr1	165191669	165191801	19.18	1.95e-17
chr1-685	chr1	165460596	165460728	18.11	3.74e-16
chr1-686	chr1	167466971	167467103	9.59	2.22e-12
chr1-687	chr1	170885401	170885533	5.68	5.34e-08
chr1-688	chr1	171111050	171111182	9.59	2.22e-12
chr1-69	chr1	88924323	88924455	27.17	9.07e-54
chr1-690	chr1	172633049	172633181	4.53	4.85e-07
chr1-691	chr1	176813348	176813480	19.18	1.95e-17
chr1-692	chr1	180393541	180393673	36.23	4.56e-21
chr1-693	chr1	181552591	181552723	9.59	2.22e-12
chr1-694	chr1	184453932	184454064	40.49	2.94e-24
chr1-695	chr1	188334106	188334238	6.39	1.36e-09
chr1-696	chr1	189927782	189927914	34.1	1.65e-19
chr1-697	chr1	191397356	191397488	6.75	1.99e-10
chr1-699	chr1	193752085	193752217	8.52	1.95e-10
chr1-7	chr1	41390325	41390457	104.42	8.28e-158
chr1-70	chr1	106759868	106760000	7.92	6.46e-29
chr1-700	chr1	194282034	194282166	18.11	3.74e-16
chr1-701	chr1	16130068	16130200	34.1	1.65e-19
chr1-702	chr1	17657461	17657593	36.23	4.56e-21
chr1-703	chr1	20951637	20951769	18.11	3.74e-16
chr1-704	chr1	23256743	23256875	5.68	5.34e-08
chr1-705	chr1	23835018	23835150	38.36	1.19e-22
chr1-706	chr1	25009006	25009138	36.23	4.56e-21
chr1-707	chr1	25166134	25166266	9.06	2.14e-11
chr1-708	chr1	34150875	34151007	31.96	5.64e-18
chr1-709	chr1	36307716	36307848	4.26	2.23e-06
chr1-71	chr1	39838892	39839024	54.34	9.93e-69
chr1-710	chr1	38130158	38130290	5.33	3.07e-07
chr1-711	chr1	41140653	41140785	17.05	6.78e-15
chr1-712	chr1	41605160	41605292	9.06	2.14e-11
chr1-713	chr1	44119633	44119765	4.26	2.23e-06
chr1-714	chr1	56973026	56973158	5.68	5.34e-08
chr1-715	chr1	57266904	57267036	36.23	4.56e-21
chr1-716	chr1	57790002	57790134	9.59	2.22e-12
chr1-717	chr1	59725735	59725867	17.05	6.78e-15
chr1-718	chr1	59789111	59789243	34.1	1.65e-19
chr1-719	chr1	59833815	59833947	6.04	8.75e-09
chr1-72	chr1	72583143	72583275	12.25	1.24e-33
chr1-720	chr1	61310130	61310262	36.23	4.56e-21
chr1-721	chr1	62393091	62393223	36.23	4.56e-21
chr1-722	chr1	66228393	66228525	5.68	5.34e-08
chr1-723	chr1	71653280	71653412	6.39	1.36e-09
chr1-724	chr1	72212210	72212342	17.05	6.78e-15
chr1-726	chr1	72593596	72593728	17.05	6.78e-15
chr1-727	chr1	75445866	75445998	5.33	3.07e-07
chr1-728	chr1	78537587	78537719	18.11	3.74e-16
chr1-729	chr1	82476900	82477032	9.06	2.14e-11
chr1-73	chr1	72739759	72739891	9.41	5.66e-33
chr1-730	chr1	85853457	85853589	18.11	3.74e-16
chr1-731	chr1	85921877	85922009	6.04	8.75e-09
chr1-733	chr1	86703804	86703936	6.04	8.75e-09
chr1-734	chr1	87755818	87755950	4.53	4.85e-07
chr1-735	chr1	88474559	88474691	5.68	5.34e-08
chr1-736	chr1	89131888	89132020	9.06	2.14e-11
chr1-737	chr1	90732913	90733045	17.05	6.78e-15
chr1-738	chr1	90754356	90754488	18.11	3.74e-16
chr1-74	chr1	91177001	91177133	17.4	1.12e-42
chr1-741	chr1	92195965	92196097	17.05	6.78e-15
chr1-742	chr1	92769884	92770016	5.68	5.34e-08
chr1-743	chr1	93220955	93221087	8.52	1.95e-10
chr1-744	chr1	93668854	93668986	8.52	1.95e-10
chr1-745	chr1	93803745	93803877	38.36	1.19e-22
chr1-746	chr1	94136873	94137005	17.05	6.78e-15
chr1-747	chr1	118458942	118459074	36.23	4.56e-21
chr1-75	chr1	169969338	169969470	13.32	4.42e-38
chr1-750	chr1	120120888	120121020	8.52	1.95e-10
chr1-751	chr1	128857065	128857197	19.18	1.95e-17
chr1-752	chr1	132007511	132007643	9.06	2.14e-11
chr1-753	chr1	133268058	133268190	36.23	4.56e-21
chr1-754	chr1	133961807	133961939	15.98	1.16e-13
chr1-755	chr1	134307561	134307693	17.05	6.78e-15
chr1-756	chr1	135583695	135583827	9.59	2.22e-12
chr1-757	chr1	136234323	136234455	9.06	2.14e-11
chr1-758	chr1	152640682	152640814	4.53	4.85e-07
chr1-759	chr1	153749324	153749456	15.98	1.16e-13
chr1-76	chr1	25892485	25892617	17.05	1.94e-41
chr1-761	chr1	155722343	155722475	18.11	3.74e-16
chr1-762	chr1	157518300	157518432	6.04	8.75e-09
chr1-764	chr1	161250176	161250308	4.26	2.23e-06
chr1-765	chr1	166153503	166153635	17.05	6.78e-15
chr1-766	chr1	168287943	168288075	18.11	3.74e-16
chr1-767	chr1	170705193	170705325	18.11	3.74e-16
chr1-768	chr1	170867711	170867843	18.11	3.74e-16
chr1-769	chr1	171150490	171150622	8.52	1.95e-10
chr1-77	chr1	64189587	64189719	9.8	1.42e-29
chr1-770	chr1	171281240	171281372	6.04	8.75e-09
chr1-771	chr1	172099674	172099806	5.68	5.34e-08
chr1-772	chr1	176774663	176774795	18.11	3.74e-16
chr1-773	chr1	178337884	178338016	6.04	8.75e-09
chr1-774	chr1	180195994	180196126	5.68	5.34e-08
chr1-775	chr1	182408851	182408983	9.59	2.22e-12
chr1-777	chr1	183147466	183147598	8.52	1.95e-10
chr1-778	chr1	183247116	183247248	34.1	1.65e-19
chr1-779	chr1	184870289	184870421	36.23	4.56e-21
chr1-78	chr1	137928702	137928834	47.95	1.88e-58
chr1-780	chr1	185617871	185618003	34.1	1.65e-19
chr1-782	chr1	191182557	191182689	5.68	5.34e-08
chr1-783	chr1	191470819	191470951	19.18	1.95e-17
chr1-784	chr1	193130215	193130347	4.26	2.23e-06
chr1-785	chr1	193449717	193449849	38.36	1.19e-22
chr1-787	chr1	194885843	194885975	8.52	1.95e-10
chr1-789	chr1	14309920	14310052	31.96	5.64e-18
chr1-79	chr1	194743011	194743143	18.82	9.93e-48
chr1-790	chr1	16619188	16619320	5.68	5.34e-08
chr1-791	chr1	20845739	20845871	17.05	6.78e-15
chr1-792	chr1	33214985	33215117	7.99	1.68e-09
chr1-794	chr1	34690580	34690712	34.1	1.65e-19
chr1-795	chr1	36709913	36710045	8.52	1.95e-10
chr1-796	chr1	38308208	38308340	8.52	1.95e-10
chr1-797	chr1	39805642	39805774	34.1	1.65e-19
chr1-798	chr1	42684886	42685018	5.33	3.07e-07
chr1-8	chr1	86509570	86509702	20.46	2.78e-88
chr1-80	chr1	134063226	134063358	11.99	1.52e-32
chr1-802	chr1	51114843	51114975	17.05	6.78e-15
chr1-803	chr1	51290751	51290883	5.33	3.07e-07
chr1-804	chr1	55130975	55131107	15.98	1.16e-13
chr1-805	chr1	56977271	56977403	7.99	1.68e-09
chr1-806	chr1	57890397	57890529	5.33	3.07e-07
chr1-807	chr1	58504923	58505055	15.98	1.16e-13
chr1-809	chr1	59763481	59763613	17.05	6.78e-15
chr1-81	chr1	165966662	165966794	98.02	8.73e-74
chr1-810	chr1	64035220	64035352	8.52	1.95e-10
chr1-811	chr1	64305853	64305985	18.11	3.74e-16
chr1-812	chr1	64791534	64791666	7.99	1.68e-09
chr1-813	chr1	64917028	64917160	34.1	1.65e-19
chr1-814	chr1	66896282	66896414	29.83	1.8e-16
chr1-815	chr1	72236527	72236659	8.52	1.95e-10
chr1-817	chr1	74505808	74505940	29.83	1.8e-16
chr1-818	chr1	75479514	75479646	4.26	2.23e-06
chr1-819	chr1	77496997	77497129	4.97	1.66e-06
chr1-82	chr1	36920254	36920386	49.01	3.84e-60
chr1-820	chr1	78593895	78594027	8.52	1.95e-10
chr1-821	chr1	82839253	82839385	34.1	1.65e-19
chr1-823	chr1	85794469	85794601	17.05	6.78e-15
chr1-824	chr1	85922586	85922718	7.99	1.68e-09
chr1-826	chr1	87010735	87010867	5.68	5.34e-08
chr1-827	chr1	87175960	87176092	8.52	1.95e-10
chr1-828	chr1	88809652	88809784	31.96	5.64e-18
chr1-829	chr1	88838717	88838849	5.68	5.34e-08
chr1-83	chr1	121087238	121087370	7.64	1.28e-23
chr1-830	chr1	89656784	89656916	4.26	2.23e-06
chr1-831	chr1	91732488	91732620	34.1	1.65e-19
chr1-832	chr1	93101469	93101601	5.68	5.34e-08
chr1-833	chr1	93342816	93342948	5.68	5.34e-08
chr1-834	chr1	97300408	97300540	36.23	4.56e-21
chr1-837	chr1	118388170	118388302	17.05	6.78e-15
chr1-838	chr1	118389238	118389370	17.05	6.78e-15
chr1-839	chr1	119504874	119505006	15.98	1.16e-13
chr1-84	chr1	153040177	153040309	25.57	1.72e-49
chr1-840	chr1	125560354	125560486	8.52	1.95e-10
chr1-841	chr1	126129279	126129411	17.05	6.78e-15
chr1-843	chr1	126660448	126660580	34.1	1.65e-19
chr1-844	chr1	130715995	130716127	34.1	1.65e-19
chr1-846	chr1	132375383	132375515	15.98	1.16e-13
chr1-848	chr1	132758734	132758866	4.26	2.23e-06
chr1-849	chr1	133492626	133492758	15.98	1.16e-13
chr1-85	chr1	79860822	79860954	26.1	6.57e-51
chr1-850	chr1	134560105	134560237	4.26	2.23e-06
chr1-852	chr1	135568182	135568314	8.52	1.95e-10
chr1-853	chr1	135821839	135821971	31.96	5.64e-18
chr1-854	chr1	135865647	135865779	4.26	2.23e-06
chr1-855	chr1	136131364	136131496	17.05	6.78e-15
chr1-856	chr1	136462631	136462763	5.68	5.34e-08
chr1-857	chr1	138596275	138596407	5.68	5.34e-08
chr1-858	chr1	138618059	138618191	4.26	2.23e-06
chr1-859	chr1	146844115	146844247	34.1	1.65e-19
chr1-86	chr1	91413221	91413353	15.27	2.27e-35
chr1-861	chr1	152410853	152410985	13.85	2.75e-11
chr1-862	chr1	152556681	152556813	4.97	1.66e-06
chr1-865	chr1	157256752	157256884	14.92	1.85e-12
chr1-866	chr1	160535033	160535165	7.99	1.68e-09
chr1-867	chr1	162197055	162197187	31.96	5.64e-18
chr1-868	chr1	162740650	162740782	4.26	2.23e-06
chr1-869	chr1	163257405	163257537	34.1	1.65e-19
chr1-87	chr1	97553999	97554131	23.97	2.7e-45
chr1-871	chr1	165461160	165461292	17.05	6.78e-15
chr1-873	chr1	171033948	171034080	7.46	1.35e-08
chr1-874	chr1	171412538	171412670	18.11	3.74e-16
chr1-875	chr1	172201297	172201429	9.06	2.14e-11
chr1-876	chr1	176994830	176994962	7.99	1.68e-09
chr1-877	chr1	176997952	176998084	5.33	3.07e-07
chr1-878	chr1	176999222	176999354	31.96	5.64e-18
chr1-879	chr1	177700725	177700857	5.33	3.07e-07
chr1-88	chr1	154983431	154983563	11.72	1.82e-31
chr1-880	chr1	180945746	180945878	7.99	1.68e-09
chr1-881	chr1	181842532	181842664	5.68	5.34e-08
chr1-882	chr1	182991044	182991176	4.97	1.66e-06
chr1-883	chr1	186474966	186475098	17.05	6.78e-15
chr1-884	chr1	186609937	186610069	15.98	1.16e-13
chr1-885	chr1	186722079	186722211	8.52	1.95e-10
chr1-887	chr1	190995767	190995899	7.99	1.68e-09
chr1-888	chr1	191325713	191325845	5.33	3.07e-07
chr1-889	chr1	191641629	191641761	5.33	3.07e-07
chr1-89	chr1	180813495	180813627	91.63	7.69e-68
chr1-891	chr1	9566370	9566502	15.98	1.16e-13
chr1-894	chr1	16540811	16540943	15.98	1.16e-13
chr1-896	chr1	20905774	20905906	4.97	1.66e-06
chr1-897	chr1	21052729	21052861	7.46	1.35e-08
chr1-898	chr1	33647258	33647390	29.83	1.8e-16
chr1-899	chr1	34459623	34459755	13.85	2.75e-11
chr1-9	chr1	176814157	176814289	96.96	9e-144
chr1-90	chr1	37890357	37890489	23.97	2.7e-45
chr1-900	chr1	34720176	34720308	6.39	7.13e-07
chr1-901	chr1	36607110	36607242	14.92	1.85e-12
chr1-902	chr1	36691410	36691542	4.97	1.66e-06
chr1-904	chr1	39535662	39535794	7.46	1.35e-08
chr1-906	chr1	40116553	40116685	5.33	3.07e-07
chr1-907	chr1	41651920	41652052	15.98	1.16e-13
chr1-908	chr1	42257925	42258057	14.92	1.85e-12
chr1-91	chr1	84839424	84839556	11.45	2.14e-30
chr1-912	chr1	55193453	55193585	4.97	1.66e-06
chr1-913	chr1	57862275	57862407	7.99	1.68e-09
chr1-915	chr1	59763936	59764068	7.46	1.35e-08
chr1-916	chr1	60098208	60098340	15.98	1.16e-13
chr1-917	chr1	65178344	65178476	4.97	1.66e-06
chr1-918	chr1	66320929	66321061	31.96	5.64e-18
chr1-919	chr1	72243810	72243942	4.97	1.66e-06
chr1-92	chr1	93343470	93343602	46.88	9.03e-57
chr1-920	chr1	74125251	74125383	5.33	3.07e-07
chr1-921	chr1	74797581	74797713	7.46	1.35e-08
chr1-922	chr1	76039194	76039326	5.33	3.07e-07
chr1-923	chr1	78371712	78371844	7.99	1.68e-09
chr1-924	chr1	78761089	78761221	29.83	1.8e-16
chr1-925	chr1	79640256	79640388	15.98	1.16e-13
chr1-926	chr1	80340542	80340674	6.93	1.02e-07
chr1-927	chr1	80408676	80408808	7.99	1.68e-09
chr1-928	chr1	85902159	85902291	17.05	6.78e-15
chr1-929	chr1	85928430	85928562	4.26	2.23e-06
chr1-93	chr1	159670986	159671118	15.27	2.27e-35
chr1-931	chr1	86007898	86008030	5.33	3.07e-07
chr1-932	chr1	90227872	90228004	7.99	1.68e-09
chr1-934	chr1	93235826	93235958	15.98	1.16e-13
chr1-936	chr1	101683982	101684114	29.83	1.8e-16
chr1-937	chr1	104848367	104848499	29.83	1.8e-16
chr1-938	chr1	105993321	105993453	8.52	1.95e-10
chr1-939	chr1	113416906	113417038	7.46	1.35e-08
chr1-94	chr1	35811567	35811699	45.82	4.23e-55
chr1-941	chr1	127204855	127204987	15.98	1.16e-13
chr1-944	chr1	132157527	132157659	6.93	1.02e-07
chr1-945	chr1	132213249	132213381	5.33	3.07e-07
chr1-946	chr1	133025271	133025403	17.05	6.78e-15
chr1-947	chr1	135659612	135659744	4.97	1.66e-06
chr1-948	chr1	135753095	135753227	7.99	1.68e-09
chr1-949	chr1	136346168	136346300	7.46	1.35e-08
chr1-95	chr1	43694938	43695070	11.19	2.46e-29
chr1-950	chr1	136769051	136769183	4.97	1.66e-06
chr1-951	chr1	137900212	137900344	13.85	2.75e-11
chr1-952	chr1	143777095	143777227	14.92	1.85e-12
chr1-953	chr1	144006733	144006865	4.97	1.66e-06
chr1-955	chr1	151632156	151632288	15.98	1.16e-13
chr1-956	chr1	152386569	152386701	4.62	8.38e-06
chr1-957	chr1	152815524	152815656	7.46	1.35e-08
chr1-958	chr1	152818036	152818168	14.92	1.85e-12
chr1-96	chr1	50897807	50897939	15.63	1.45e-36
chr1-960	chr1	155293586	155293718	4.97	1.66e-06
chr1-962	chr1	157501677	157501809	29.83	1.8e-16
chr1-963	chr1	160194928	160195060	13.85	2.75e-11
chr1-966	chr1	163423784	163423916	31.96	5.64e-18
chr1-968	chr1	166002815	166002947	4.62	8.38e-06
chr1-969	chr1	166044014	166044146	7.99	1.68e-09
chr1-97	chr1	54485073	54485205	93.76	8.21e-70
chr1-970	chr1	168046563	168046695	14.92	1.85e-12
chr1-971	chr1	168198395	168198527	31.96	5.64e-18
chr1-972	chr1	171345599	171345731	4.97	1.66e-06
chr1-973	chr1	172082652	172082784	15.98	1.16e-13
chr1-974	chr1	172594624	172594756	29.83	1.8e-16
chr1-975	chr1	175385814	175385946	29.83	1.8e-16
chr1-976	chr1	175692533	175692665	7.99	1.68e-09
chr1-977	chr1	176986372	176986504	31.96	5.64e-18
chr1-978	chr1	176987114	176987246	7.46	1.35e-08
chr1-979	chr1	177495281	177495413	15.98	1.16e-13
chr1-98	chr1	89400784	89400916	23.97	2.7e-45
chr1-980	chr1	177983026	177983158	5.33	3.07e-07
chr1-981	chr1	180725953	180726085	4.97	1.66e-06
chr1-982	chr1	181017392	181017524	4.26	2.23e-06
chr1-984	chr1	181379802	181379934	5.33	3.07e-07
chr1-985	chr1	182489933	182490065	29.83	1.8e-16
chr1-986	chr1	182908582	182908714	7.99	1.68e-09
chr1-987	chr1	183047720	183047852	7.46	1.35e-08
chr1-988	chr1	183521681	183521813	15.98	1.16e-13
chr1-99	chr1	193338448	193338580	22.38	3.49e-41
chr1-990	chr1	185741435	185741567	14.92	1.85e-12
chr1-991	chr1	186250415	186250547	7.99	1.68e-09
chr1-992	chr1	186641203	186641335	29.83	1.8e-16
chr1-993	chr1	187076622	187076754	4.62	8.38e-06
chr1-994	chr1	188885993	188886125	17.05	6.78e-15
chr1-995	chr1	191275663	191275795	4.62	8.38e-06
chr1-996	chr1	191981642	191981774	4.97	1.66e-06
chr1-997	chr1	6214536	6214668	27.7	5.38e-15
chr1-999	chr1	17449420	17449552	6.93	1.02e-07
chr10-1	chr10	7605331	7605463	16.2	5.52e-63
chr10-10	chr10	96616950	96617082	62.86	6.68e-83
chr10-100	chr10	43173239	43173371	14.92	2.44e-23
chr10-1000	chr10	22658856	22658988	21.31	8.93e-11
chr10-1004	chr10	26564552	26564684	19.18	1.9e-09
chr10-1005	chr10	26711289	26711421	23.44	3.81e-12
chr10-1006	chr10	26845084	26845216	19.18	1.9e-09
chr10-1009	chr10	31445770	31445902	5.33	2.75e-05
chr10-101	chr10	44118692	44118824	14.92	2.44e-23
chr10-1011	chr10	33951127	33951259	8.52	5.84e-06
chr10-1012	chr10	37028794	37028926	8.52	5.84e-06
chr10-1014	chr10	38308973	38309105	19.18	1.9e-09
chr10-1015	chr10	38309322	38309454	10.65	5.72e-08
chr10-1016	chr10	38354242	38354374	21.31	8.93e-11
chr10-1019	chr10	39472282	39472414	10.65	5.72e-08
chr10-102	chr10	58907228	58907360	14.38	3.65e-22
chr10-1021	chr10	39811672	39811804	5.33	2.75e-05
chr10-1024	chr10	40529889	40530021	10.65	5.72e-08
chr10-1026	chr10	41501138	41501270	5.33	2.75e-05
chr10-103	chr10	79854186	79854318	29.83	2.17e-31
chr10-1030	chr10	42933185	42933317	19.18	1.9e-09
chr10-1031	chr10	43527782	43527914	5.33	2.75e-05
chr10-1033	chr10	45577786	45577918	10.65	5.72e-08
chr10-1034	chr10	45800173	45800305	9.59	6.09e-07
chr10-1037	chr10	52382000	52382132	19.18	1.9e-09
chr10-104	chr10	81174985	81175117	13.32	7.31e-20
chr10-1040	chr10	58362814	58362946	17.05	3.65e-08
chr10-1041	chr10	58377970	58378102	10.65	5.72e-08
chr10-1044	chr10	59616645	59616777	21.31	8.93e-11
chr10-1046	chr10	59890410	59890542	19.18	1.9e-09
chr10-1049	chr10	60245171	60245303	9.59	6.09e-07
chr10-105	chr10	116362263	116362395	29.83	2.17e-31
chr10-1052	chr10	61374941	61375073	9.59	6.09e-07
chr10-1058	chr10	62602295	62602427	19.18	1.9e-09
chr10-1059	chr10	62740043	62740175	19.18	1.9e-09
chr10-106	chr10	31295836	31295968	8.88	7.51e-16
chr10-1060	chr10	63066088	63066220	10.65	5.72e-08
chr10-1062	chr10	67144321	67144453	17.05	3.65e-08
chr10-1063	chr10	67285302	67285434	10.65	5.72e-08
chr10-1065	chr10	68192248	68192380	19.18	1.9e-09
chr10-1067	chr10	69238441	69238573	10.65	5.72e-08
chr10-1068	chr10	69654932	69655064	19.18	1.9e-09
chr10-1069	chr10	70095148	70095280	5.86	4.62e-06
chr10-107	chr10	38553713	38553845	26.64	5.16e-27
chr10-1070	chr10	70485025	70485157	19.18	1.9e-09
chr10-1071	chr10	70686580	70686712	9.59	6.09e-07
chr10-1072	chr10	71222616	71222748	5.33	2.75e-05
chr10-1075	chr10	75450982	75451114	10.65	5.72e-08
chr10-1079	chr10	77130682	77130814	5.33	2.75e-05
chr10-108	chr10	40247065	40247197	7.46	1.08e-15
chr10-1080	chr10	77215676	77215808	9.59	6.09e-07
chr10-1081	chr10	77418229	77418361	10.65	5.72e-08
chr10-1083	chr10	77978438	77978570	9.59	6.09e-07
chr10-1085	chr10	79925500	79925632	10.65	5.72e-08
chr10-1089	chr10	80406640	80406772	5.33	2.75e-05
chr10-109	chr10	47102751	47102883	25.57	1.38e-25
chr10-1097	chr10	81551725	81551857	21.31	8.93e-11
chr10-11	chr10	84756033	84756165	64.99	1.61e-86
chr10-110	chr10	59786404	59786536	4.79	7.59e-11
chr10-1100	chr10	83117062	83117194	8.52	5.84e-06
chr10-1101	chr10	83261312	83261444	21.31	8.93e-11
chr10-1102	chr10	83640071	83640203	10.65	5.72e-08
chr10-1105	chr10	84803674	84803806	5.33	2.75e-05
chr10-1106	chr10	84900053	84900185	10.65	5.72e-08
chr10-1107	chr10	84966764	84966896	21.31	8.93e-11
chr10-1108	chr10	85013574	85013706	5.33	2.75e-05
chr10-111	chr10	59951714	59951846	14.38	3.65e-22
chr10-1113	chr10	86323332	86323464	5.33	2.75e-05
chr10-1115	chr10	86463866	86463998	5.33	2.75e-05
chr10-1119	chr10	90576657	90576789	5.33	2.75e-05
chr10-112	chr10	62183230	62183362	8.88	7.51e-16
chr10-1120	chr10	90829233	90829365	8.52	5.84e-06
chr10-1122	chr10	91591448	91591580	5.33	2.75e-05
chr10-113	chr10	67851132	67851264	9.94	8.42e-19
chr10-1130	chr10	94530290	94530422	19.18	1.9e-09
chr10-1131	chr10	94710184	94710316	21.31	8.93e-11
chr10-1132	chr10	94944919	94945051	5.33	2.75e-05
chr10-1137	chr10	99106759	99106891	9.59	6.09e-07
chr10-114	chr10	77229721	77229853	14.92	2.44e-23
chr10-1142	chr10	108017896	108018028	17.05	3.65e-08
chr10-1143	chr10	109010542	109010674	9.59	6.09e-07
chr10-1144	chr10	109569947	109570079	9.59	6.09e-07
chr10-1147	chr10	110920042	110920174	10.65	5.72e-08
chr10-1148	chr10	111165293	111165425	9.59	6.09e-07
chr10-1149	chr10	111912625	111912757	9.59	6.09e-07
chr10-115	chr10	78570503	78570635	59.67	1.29e-39
chr10-1150	chr10	112138602	112138734	11.72	4.88e-09
chr10-1151	chr10	112876921	112877053	21.31	8.93e-11
chr10-1154	chr10	118923874	118924006	10.65	5.72e-08
chr10-1155	chr10	119453274	119453406	19.18	1.9e-09
chr10-1159	chr10	120388607	120388739	10.65	5.72e-08
chr10-116	chr10	84060833	84060965	59.67	1.29e-39
chr10-1163	chr10	121739810	121739942	8.52	5.84e-06
chr10-117	chr10	91187960	91188092	27.7	1.86e-28
chr10-1170	chr10	127069277	127069409	5.33	2.75e-05
chr10-1174	chr10	127342009	127342141	5.33	2.75e-05
chr10-1175	chr10	127381201	127381333	9.59	6.09e-07
chr10-1179	chr10	127662880	127663012	10.65	5.72e-08
chr10-118	chr10	94413788	94413920	9.59	8.4e-18
chr10-1181	chr10	128059647	128059779	5.33	2.75e-05
chr10-1183	chr10	128458391	128458523	5.86	4.62e-06
chr10-1185	chr10	128704979	128705111	10.65	5.72e-08
chr10-1188	chr10	3509725	3509857	17.05	3.65e-08
chr10-1189	chr10	3741188	3741320	9.59	6.09e-07
chr10-119	chr10	117095079	117095211	13.85	5.26e-21
chr10-1190	chr10	3863661	3863793	19.18	1.9e-09
chr10-1191	chr10	4467264	4467396	19.18	1.9e-09
chr10-1192	chr10	5824940	5825072	19.18	1.9e-09
chr10-1193	chr10	6916670	6916802	8.52	5.84e-06
chr10-1196	chr10	8035532	8035664	17.05	3.65e-08
chr10-1197	chr10	8060105	8060237	19.18	1.9e-09
chr10-12	chr10	111354700	111354832	62.86	6.68e-83
chr10-120	chr10	14482585	14482717	53.27	2.46e-34
chr10-1200	chr10	8752522	8752654	9.59	6.09e-07
chr10-1201	chr10	8760590	8760722	9.59	6.09e-07
chr10-1203	chr10	9272479	9272611	8.52	5.84e-06
chr10-1204	chr10	10472357	10472489	8.52	5.84e-06
chr10-1205	chr10	10558146	10558278	8.52	5.84e-06
chr10-1206	chr10	12548742	12548874	8.52	5.84e-06
chr10-1207	chr10	13016774	13016906	19.18	1.9e-09
chr10-1209	chr10	17983522	17983654	8.52	5.84e-06
chr10-121	chr10	19310142	19310274	28.77	6.48e-30
chr10-1210	chr10	18022974	18023106	7.46	4.98e-05
chr10-1211	chr10	18055526	18055658	21.31	8.93e-11
chr10-1216	chr10	18437708	18437840	19.18	1.9e-09
chr10-1217	chr10	19609196	19609328	9.59	6.09e-07
chr10-1219	chr10	20723192	20723324	19.18	1.9e-09
chr10-122	chr10	20226886	20227018	25.57	1.38e-25
chr10-1220	chr10	20944560	20944692	9.59	6.09e-07
chr10-1225	chr10	22148545	22148677	8.52	5.84e-06
chr10-1226	chr10	24312115	24312247	9.59	6.09e-07
chr10-1229	chr10	24485528	24485660	8.52	5.84e-06
chr10-123	chr10	24869854	24869986	4.11	1.99e-09
chr10-1230	chr10	24826284	24826416	8.52	5.84e-06
chr10-1232	chr10	25372378	25372510	19.18	1.9e-09
chr10-1233	chr10	25965443	25965575	17.05	3.65e-08
chr10-1234	chr10	26373393	26373525	9.59	6.09e-07
chr10-1235	chr10	26560679	26560811	8.52	5.84e-06
chr10-1236	chr10	29967373	29967505	19.18	1.9e-09
chr10-1237	chr10	30802687	30802819	9.59	6.09e-07
chr10-1238	chr10	32489015	32489147	17.05	3.65e-08
chr10-124	chr10	40883485	40883617	9.59	8.4e-18
chr10-1242	chr10	38419980	38420112	19.18	1.9e-09
chr10-1243	chr10	38855069	38855201	9.59	6.09e-07
chr10-1245	chr10	38897739	38897871	17.05	3.65e-08
chr10-1249	chr10	39421383	39421515	9.59	6.09e-07
chr10-125	chr10	60262419	60262551	6.93	5.83e-14
chr10-1251	chr10	39576872	39577004	7.46	4.98e-05
chr10-1252	chr10	39640863	39640995	8.52	5.84e-06
chr10-1253	chr10	40142222	40142354	9.59	6.09e-07
chr10-1259	chr10	41544652	41544784	7.46	4.98e-05
chr10-126	chr10	121946351	121946483	12.79	9.76e-19
chr10-1262	chr10	41887079	41887211	9.59	6.09e-07
chr10-1264	chr10	42293394	42293526	17.05	3.65e-08
chr10-1266	chr10	42679108	42679240	17.05	3.65e-08
chr10-1267	chr10	43244523	43244655	9.59	6.09e-07
chr10-1268	chr10	43527481	43527613	8.52	5.84e-06
chr10-1269	chr10	43943799	43943931	17.05	3.65e-08
chr10-127	chr10	128322366	128322498	25.57	1.38e-25
chr10-1271	chr10	44388850	44388982	8.52	5.84e-06
chr10-1273	chr10	45850628	45850760	9.59	6.09e-07
chr10-1274	chr10	45871168	45871300	19.18	1.9e-09
chr10-1277	chr10	49788371	49788503	8.52	5.84e-06
chr10-1279	chr10	52274419	52274551	7.46	4.98e-05
chr10-128	chr10	13967448	13967580	5.33	4.39e-11
chr10-1280	chr10	53379242	53379374	19.18	1.9e-09
chr10-1281	chr10	53629452	53629584	9.59	6.09e-07
chr10-1283	chr10	57577433	57577565	17.05	3.65e-08
chr10-1287	chr10	58559886	58560018	17.05	3.65e-08
chr10-1289	chr10	58812434	58812566	17.05	3.65e-08
chr10-129	chr10	39471867	39471999	25.57	1.38e-25
chr10-1291	chr10	59150006	59150138	17.05	3.65e-08
chr10-13	chr10	80385920	80386052	59.67	1.58e-77
chr10-130	chr10	40302203	40302335	6.93	5.83e-14
chr10-1300	chr10	60835141	60835273	19.18	1.9e-09
chr10-1306	chr10	62578414	62578546	9.59	6.09e-07
chr10-1307	chr10	62590295	62590427	8.52	5.84e-06
chr10-1309	chr10	62946822	62946954	17.05	3.65e-08
chr10-131	chr10	60985285	60985417	51.14	1.31e-32
chr10-1313	chr10	67116465	67116597	8.52	5.84e-06
chr10-1314	chr10	67182707	67182839	17.05	3.65e-08
chr10-1317	chr10	67912411	67912543	17.05	3.65e-08
chr10-1318	chr10	68136735	68136867	19.18	1.9e-09
chr10-132	chr10	61452743	61452875	8.52	6.7e-15
chr10-1320	chr10	69872455	69872587	19.18	1.9e-09
chr10-1321	chr10	70437505	70437637	19.18	1.9e-09
chr10-1322	chr10	70506696	70506828	9.59	6.09e-07
chr10-1325	chr10	74607624	74607756	9.59	6.09e-07
chr10-133	chr10	62320656	62320788	7.81	4.71e-13
chr10-1333	chr10	75457874	75458006	10.65	5.72e-08
chr10-1336	chr10	75666651	75666783	10.65	5.72e-08
chr10-1337	chr10	75860230	75860362	9.59	6.09e-07
chr10-1338	chr10	75873827	75873959	17.05	3.65e-08
chr10-134	chr10	79908676	79908808	5.33	4.39e-11
chr10-1340	chr10	76962082	76962214	9.59	6.09e-07
chr10-1345	chr10	77581591	77581723	9.59	6.09e-07
chr10-1346	chr10	77606028	77606160	17.05	3.65e-08
chr10-1347	chr10	77606325	77606457	17.05	3.65e-08
chr10-135	chr10	93275514	93275646	28.77	6.48e-30
chr10-1354	chr10	78722913	78723045	19.18	1.9e-09
chr10-1355	chr10	78812710	78812842	17.05	3.65e-08
chr10-136	chr10	7582289	7582421	4.9	1.22e-09
chr10-1360	chr10	80241787	80241919	17.05	3.65e-08
chr10-137	chr10	14703314	14703446	49.01	6.7e-31
chr10-1372	chr10	82127843	82127975	8.52	5.84e-06
chr10-1374	chr10	82640512	82640644	8.52	5.84e-06
chr10-1375	chr10	83130932	83131064	17.05	3.65e-08
chr10-138	chr10	21923678	21923810	25.57	1.38e-25
chr10-1382	chr10	85045357	85045489	8.52	5.84e-06
chr10-1391	chr10	90577066	90577198	17.05	3.65e-08
chr10-1394	chr10	92006619	92006751	5.33	2.75e-05
chr10-1395	chr10	93194864	93194996	10.65	5.72e-08
chr10-1398	chr10	94172709	94172841	8.52	5.84e-06
chr10-1399	chr10	94294997	94295129	8.52	5.84e-06
chr10-14	chr10	58601065	58601197	28.77	4.02e-58
chr10-1402	chr10	94561569	94561701	9.59	6.09e-07
chr10-1403	chr10	94688461	94688593	21.31	8.93e-11
chr10-1405	chr10	94958381	94958513	14.92	6.22e-07
chr10-1407	chr10	95671242	95671374	19.18	1.9e-09
chr10-141	chr10	63880422	63880554	12.25	1.25e-17
chr10-1414	chr10	108161735	108161867	9.59	6.09e-07
chr10-1417	chr10	109920885	109921017	9.59	6.09e-07
chr10-1418	chr10	110240893	110241025	17.05	3.65e-08
chr10-1419	chr10	110556463	110556595	14.92	6.22e-07
chr10-142	chr10	69594642	69594774	51.14	1.31e-32
chr10-1422	chr10	111139285	111139417	19.18	1.9e-09
chr10-1426	chr10	114203060	114203192	17.05	3.65e-08
chr10-1427	chr10	115354540	115354672	19.18	1.9e-09
chr10-143	chr10	74114284	74114416	49.01	6.7e-31
chr10-1433	chr10	117906348	117906480	10.65	5.72e-08
chr10-1434	chr10	117983683	117983815	9.59	6.09e-07
chr10-1435	chr10	118370486	118370618	9.59	6.09e-07
chr10-1436	chr10	118970665	118970797	17.05	3.65e-08
chr10-1439	chr10	120227135	120227267	19.18	1.9e-09
chr10-144	chr10	75921081	75921213	8.17	5.74e-14
chr10-1444	chr10	121516229	121516361	9.59	6.09e-07
chr10-1445	chr10	121586809	121586941	9.59	6.09e-07
chr10-1446	chr10	121701365	121701497	9.59	6.09e-07
chr10-1448	chr10	122052020	122052152	21.31	8.93e-11
chr10-1449	chr10	122096675	122096807	8.52	5.84e-06
chr10-145	chr10	80249242	80249374	4.9	1.22e-09
chr10-1454	chr10	126814414	126814546	8.52	5.84e-06
chr10-1455	chr10	126828551	126828683	8.52	5.84e-06
chr10-1456	chr10	126845333	126845465	8.52	5.84e-06
chr10-146	chr10	81627428	81627560	12.79	9.76e-19
chr10-1460	chr10	127094439	127094571	10.65	5.72e-08
chr10-1462	chr10	127426887	127427019	8.52	5.84e-06
chr10-1463	chr10	127538083	127538215	10.65	5.72e-08
chr10-147	chr10	82048083	82048215	23.44	8.62e-23
chr10-148	chr10	93453365	93453497	5.11	2.36e-10
chr10-149	chr10	94230722	94230854	7.81	4.71e-13
chr10-15	chr10	70380067	70380199	31.43	1.56e-65
chr10-150	chr10	105841289	105841421	8.17	5.74e-14
chr10-151	chr10	111600681	111600813	4.48	2.86e-08
chr10-152	chr10	126957899	126958031	24.51	3.52e-24
chr10-153	chr10	127121141	127121273	6.39	2.72e-12
chr10-154	chr10	20170626	20170758	21.31	4.52e-20
chr10-155	chr10	40516618	40516750	8.17	5.74e-14
chr10-156	chr10	41934840	41934972	4.9	1.22e-09
chr10-157	chr10	53537725	53537857	5.86	1.08e-10
chr10-158	chr10	56935192	56935324	23.44	8.62e-23
chr10-159	chr10	57822698	57822830	24.51	3.52e-24
chr10-16	chr10	23674780	23674912	28.24	1.16e-56
chr10-160	chr10	59470647	59470779	46.88	3.29e-29
chr10-161	chr10	62356514	62356646	23.44	8.62e-23
chr10-163	chr10	80256312	80256444	11.72	1.54e-16
chr10-164	chr10	80259889	80260021	24.51	3.52e-24
chr10-166	chr10	85539606	85539738	12.79	9.76e-19
chr10-167	chr10	88201092	88201224	5.33	3.62e-09
chr10-168	chr10	91181808	91181940	8.88	7.51e-16
chr10-169	chr10	93432600	93432732	24.51	3.52e-24
chr10-17	chr10	37627998	37628130	57.54	5.51e-74
chr10-170	chr10	93589523	93589655	49.01	6.7e-31
chr10-171	chr10	99197617	99197749	29.83	2.17e-31
chr10-173	chr10	118141506	118141638	51.14	1.31e-32
chr10-174	chr10	121837698	121837830	23.44	8.62e-23
chr10-175	chr10	126775895	126776027	12.25	1.25e-17
chr10-176	chr10	128565892	128566024	4.48	2.86e-08
[truncated: 23,306 more rows]

## Sheet: Sox_ChIP_NPC
#PeakID	chr	start	end	Fold Change vs Control	p-value vs Control	Fold Change vs Local	p-value vs Local
chr1-1	chr1	86526531	86526663	449.64	0	53.65	2.7e-277
chr1-10	chr1	153506403	153506535	49.01	1.82e-118	67.43	5.42e-131
chr1-100	chr1	25830596	25830728	6.7	5.79e-22	31.03	4.43e-49
chr1-1000	chr1	25885136	25885268	13.85	2.75e-11	32.39	7.52e-16
chr1-1001	chr1	31103051	31103183	14.92	1.85e-12	20.52	2.74e-14
chr1-1002	chr1	33669745	33669877	4.97	1.66e-06	12.76	1.51e-11
chr1-1003	chr1	34387585	34387717	13.85	2.75e-11	32.39	7.52e-16
chr1-1005	chr1	37541109	37541241	14.92	1.85e-12	17.16	2.94e-13
chr1-1006	chr1	41158214	41158346	13.85	2.75e-11	17.05	2.21e-12
chr1-1007	chr1	41555796	41555928	27.7	5.38e-15	16.47	3.36e-12
chr1-1008	chr1	42229764	42229896	29.83	1.8e-16	17.16	2.94e-13
chr1-101	chr1	51996731	51996863	11.19	2.46e-29	23.61	4.04e-42
chr1-1010	chr1	43445887	43446019	13.85	2.75e-11	10.56	7.63e-10
chr1-1011	chr1	44118655	44118787	4.62	8.38e-06	8.38	1.16e-08
chr1-1012	chr1	45091384	45091516	25.57	1.49e-13	30.93	1.64e-14
chr1-1013	chr1	55052627	55052759	6.93	1.02e-07	15.67	6.15e-12
chr1-1015	chr1	57406669	57406801	4.97	1.66e-06	19.03	7.48e-14
chr1-1016	chr1	57429910	57430042	4.97	1.66e-06	10.9	1.15e-10
chr1-1018	chr1	57970100	57970232	6.93	1.02e-07	16.76	2.73e-12
chr1-1019	chr1	57995805	57995937	7.46	1.35e-08	23.26	5.15e-15
chr1-102	chr1	58973349	58973481	15.27	2.27e-35	45.92	3.84e-55
chr1-1020	chr1	60180315	60180447	6.93	1.02e-07	11.71	2.24e-10
chr1-1021	chr1	60409289	60409421	29.83	1.8e-16	14.34	3.1e-12
chr1-1022	chr1	60851288	60851420	29.83	1.8e-16	18.69	9.5e-14
chr1-1023	chr1	61234449	61234581	29.83	1.8e-16	14.74	2.16e-12
chr1-1024	chr1	62753425	62753557	7.46	1.35e-08	12.46	2.06e-11
chr1-1028	chr1	66778027	66778159	4.97	1.66e-06	36.09	1.36e-17
chr1-1029	chr1	72142009	72142141	29.83	1.8e-16	23.26	5.15e-15
chr1-103	chr1	88277455	88277587	6.24	1.64e-19	14.74	3.29e-33
chr1-1031	chr1	73862878	73863010	4.97	1.66e-06	12.31	2.4e-11
chr1-1032	chr1	75124714	75124846	4.97	1.66e-06	15.39	1.23e-12
chr1-1033	chr1	76212706	76212838	15.98	1.16e-13	44.85	4e-20
chr1-1034	chr1	76642843	76642975	29.83	1.8e-16	20.93	2.11e-14
chr1-1035	chr1	77043922	77044054	27.7	5.38e-15	31.35	1.14e-15
chr1-1036	chr1	77371077	77371209	14.92	1.85e-12	24.34	2.8e-15
chr1-1038	chr1	80728346	80728478	14.92	1.85e-12	25.53	1.48e-15
chr1-1039	chr1	80854509	80854641	27.7	5.38e-15	17.35	1.78e-12
chr1-104	chr1	106155390	106155522	7.99	2.04e-25	32.98	2.6e-51
chr1-1041	chr1	82358868	82359000	6.93	1.02e-07	18.69	7.15e-13
chr1-1042	chr1	82724810	82724942	11.72	4.88e-09	14.95	4.1e-10
chr1-1044	chr1	87187098	87187230	27.7	5.38e-15	12.96	6.61e-11
chr1-1046	chr1	89136537	89136669	14.92	1.85e-12	6.19	1.28e-07
chr1-1049	chr1	90561070	90561202	4.62	8.38e-06	17.35	1.78e-12
chr1-105	chr1	119329035	119329167	22.91	1.52e-42	44.04	2.24e-54
chr1-1050	chr1	90915327	90915459	7.46	1.35e-08	23.79	3.81e-15
chr1-1052	chr1	91380546	91380678	6.93	1.02e-07	21.6	1.2e-13
chr1-1053	chr1	93635704	93635836	6.93	1.02e-07	12.46	1.06e-10
chr1-1054	chr1	95268222	95268354	13.85	2.75e-11	18	1.14e-12
chr1-1055	chr1	105990224	105990356	27.7	5.38e-15	7.71	2.99e-08
chr1-1056	chr1	111864890	111865022	13.85	2.75e-11	15.93	5.05e-12
chr1-1057	chr1	118976818	118976950	4.26	3.94e-05	9.34	1.29e-08
chr1-1059	chr1	119053640	119053772	4.97	1.66e-06	8.18	4.34e-09
chr1-106	chr1	135852503	135852635	14.56	5.19e-33	31.93	2.42e-46
chr1-1060	chr1	119087681	119087813	13.85	2.75e-11	12.79	7.76e-11
chr1-1063	chr1	121180449	121180581	13.85	2.75e-11	10.56	7.63e-10
chr1-1065	chr1	127339177	127339309	4.62	8.38e-06	22.6	6.82e-14
chr1-1067	chr1	132111382	132111514	7.46	1.35e-08	21.36	1.61e-14
chr1-1068	chr1	132844190	132844322	13.85	2.75e-11	13.69	3.18e-11
chr1-107	chr1	178336498	178336630	21.31	1.71e-38	20.07	1.68e-37
chr1-1070	chr1	134205429	134205561	13.85	2.75e-11	15.67	6.15e-12
chr1-1071	chr1	134415281	134415413	4.62	8.38e-06	14.29	1.89e-11
chr1-1072	chr1	134858859	134858991	27.7	5.38e-15	18.34	9.03e-13
chr1-1074	chr1	135347976	135348108	4.62	8.38e-06	12.3	1.24e-10
chr1-1075	chr1	135368371	135368503	14.92	1.85e-12	13.42	7.87e-12
chr1-1077	chr1	135563919	135564051	7.46	1.35e-08	7.32	1.7e-08
chr1-1078	chr1	135625938	135626070	4.62	8.38e-06	17.05	2.21e-12
chr1-1079	chr1	136940714	136940846	13.85	2.75e-11	29.45	2.5e-15
chr1-1080	chr1	137656879	137657011	7.46	1.35e-08	13.59	6.65e-12
chr1-1081	chr1	143145180	143145312	12.79	3.81e-10	15.2	5.54e-11
chr1-1082	chr1	143941582	143941714	7.46	1.35e-08	21.8	1.22e-14
chr1-1083	chr1	150535862	150535994	6.39	7.13e-07	13.19	2.7e-10
chr1-1084	chr1	151500674	151500806	7.46	1.35e-08	12.03	3.24e-11
chr1-1085	chr1	151925842	151925974	29.83	1.8e-16	18.69	9.5e-14
chr1-1086	chr1	156938929	156939061	6.93	1.02e-07	14.72	1.31e-11
chr1-1087	chr1	157244455	157244587	7.46	1.35e-08	20.52	2.74e-14
chr1-1088	chr1	157418063	157418195	7.46	1.35e-08	20.13	3.55e-14
chr1-1089	chr1	157446428	157446560	15.98	1.16e-13	11.68	9.8e-12
chr1-109	chr1	38450778	38450910	21.31	1.71e-38	49.84	8.31e-53
chr1-1090	chr1	159761098	159761230	29.83	1.8e-16	16.61	4.5e-13
chr1-1091	chr1	160115360	160115492	13.85	2.75e-11	18	1.14e-12
chr1-1092	chr1	163994774	163994906	7.46	1.35e-08	20.52	2.74e-14
chr1-1093	chr1	165634416	165634548	6.93	1.02e-07	11.43	2.97e-10
chr1-1094	chr1	165853846	165853978	14.92	1.85e-12	18.04	1.51e-13
chr1-1095	chr1	166154310	166154442	13.85	2.75e-11	12	1.67e-10
chr1-1097	chr1	168291277	168291409	6.93	1.02e-07	7.65	3.28e-08
chr1-1098	chr1	168355102	168355234	4.97	1.66e-06	11.38	6.67e-11
chr1-1099	chr1	168384410	168384542	13.85	2.75e-11	14.51	1.58e-11
chr1-11	chr1	88658477	88658609	46.35	4.6e-110	32.2	1.19e-96
chr1-110	chr1	73270918	73271050	21.84	7.82e-40	28.65	1.79e-44
chr1-1100	chr1	169052002	169052134	6.93	1.02e-07	7.77	2.73e-08
chr1-1101	chr1	171411132	171411264	5.33	3.07e-07	10.68	3.36e-11
chr1-1102	chr1	171501644	171501776	29.83	1.8e-16	6.54	6.65e-08
chr1-1103	chr1	171504078	171504210	27.7	5.38e-15	6.04	4.71e-07
chr1-1105	chr1	172357687	172357819	27.7	5.38e-15	17.05	2.21e-12
chr1-1106	chr1	174501705	174501837	6.93	1.02e-07	10.34	9.85e-10
chr1-1107	chr1	175880598	175880730	13.85	2.75e-11	19.83	3.44e-13
chr1-1108	chr1	177322805	177322937	6.93	1.02e-07	14.29	1.89e-11
chr1-1109	chr1	177646155	177646287	7.46	1.35e-08	13.95	4.72e-12
chr1-111	chr1	152904658	152904790	89.5	7.05e-66	28.81	1.3e-45
chr1-1110	chr1	178357904	178358036	7.46	1.35e-08	14.95	1.79e-12
chr1-1112	chr1	179842638	179842770	7.99	1.68e-09	19.01	9.97e-15
chr1-1113	chr1	180365598	180365730	6.93	1.02e-07	8.76	6.93e-09
chr1-1114	chr1	180377535	180377667	29.83	1.8e-16	18.69	9.5e-14
chr1-1116	chr1	182103491	182103623	4.62	8.38e-06	13.69	3.18e-11
chr1-1118	chr1	182663811	182663943	15.98	1.16e-13	20.39	3.67e-15
chr1-112	chr1	170521673	170521805	21.84	7.82e-40	60.1	2.34e-57
chr1-1122	chr1	183783951	183784083	12.79	3.81e-10	11.65	1.15e-09
chr1-1123	chr1	184441419	184441551	6.93	1.02e-07	17.67	1.42e-12
chr1-1124	chr1	189507375	189507507	13.85	2.75e-11	24.3	2.77e-14
chr1-1125	chr1	190728093	190728225	14.92	1.85e-12	10.16	2.83e-10
chr1-1126	chr1	191026130	191026262	6.93	1.02e-07	12	1.67e-10
chr1-1128	chr1	191907574	191907706	14.92	1.85e-12	14.34	3.1e-12
chr1-1129	chr1	194721411	194721543	14.92	1.85e-12	14.95	1.79e-12
chr1-113	chr1	34005856	34005988	14.21	7.57e-32	27.43	1.05e-42
chr1-1130	chr1	194976893	194977025	4.62	8.38e-06	8.92	5.61e-09
chr1-1131	chr1	195131008	195131140	14.92	1.85e-12	17.44	2.37e-13
chr1-1133	chr1	7397344	7397476	14.92	1.85e-12	8.72	1.94e-09
chr1-1136	chr1	21411670	21411802	25.57	1.49e-13	20.39	2e-12
chr1-1138	chr1	25893079	25893211	13.85	2.75e-11	9.17	4.05e-09
chr1-1139	chr1	30950326	30950458	13.85	2.75e-11	7.53	3.92e-08
chr1-114	chr1	84155345	84155477	40.49	6.71e-47	40.01	1.04e-46
chr1-1140	chr1	33814490	33814622	5.33	2.75e-05	9.12	2.57e-07
chr1-1141	chr1	34005456	34005588	27.7	5.38e-15	7.36	5.09e-08
chr1-1142	chr1	34304304	34304436	13.85	2.75e-11	15.93	5.05e-12
chr1-1145	chr1	36003725	36003857	6.93	1.02e-07	25.57	1.46e-14
chr1-1146	chr1	36303705	36303837	6.93	1.02e-07	9.26	3.62e-09
chr1-1148	chr1	36939505	36939637	6.39	7.13e-07	8.31	4.57e-08
chr1-1149	chr1	37865207	37865339	12.79	3.81e-10	17.59	1.07e-11
chr1-115	chr1	88478271	88478403	87.37	6.31e-64	23.4	5.26e-41
chr1-1151	chr1	39736229	39736361	7.46	1.35e-08	11.89	3.76e-11
chr1-1152	chr1	39923510	39923642	4.62	8.38e-06	8.83	6.24e-09
chr1-1153	chr1	42527738	42527870	13.85	2.75e-11	16.47	3.36e-12
chr1-1155	chr1	42630092	42630224	12.79	3.81e-10	19.5	3.32e-12
chr1-1156	chr1	44591874	44592006	4.97	1.66e-06	33.76	3.37e-17
chr1-1157	chr1	52652963	52653095	27.7	5.38e-15	38.87	7.52e-17
chr1-1158	chr1	54438948	54439080	7.46	1.35e-08	30.78	1.18e-16
chr1-116	chr1	91209512	91209644	21.84	7.82e-40	13.27	1.8e-31
chr1-1160	chr1	54922797	54922929	12.79	3.81e-10	12.46	5.08e-10
chr1-1161	chr1	55088534	55088666	13.85	2.75e-11	8.1	1.71e-08
chr1-1162	chr1	55226488	55226620	6.93	1.02e-07	12.62	9.08e-11
chr1-1163	chr1	55383227	55383359	4.26	3.94e-05	37.38	1.82e-15
chr1-1165	chr1	55528728	55528860	27.7	5.38e-15	15.93	5.05e-12
chr1-1166	chr1	55665911	55666043	6.93	1.02e-07	19.06	5.63e-13
chr1-1167	chr1	55742071	55742203	25.57	1.49e-13	24.25	2.75e-13
chr1-1168	chr1	61621090	61621222	13.85	2.75e-11	21.13	1.57e-13
chr1-1169	chr1	62951485	62951617	6.93	1.02e-07	21.13	1.57e-13
chr1-117	chr1	139337090	139337222	10.92	2.76e-28	32.26	1.6e-46
chr1-1170	chr1	62964357	62964489	4.26	3.94e-05	16.02	3.08e-11
chr1-1172	chr1	64302910	64303042	6.93	1.02e-07	8.1	1.71e-08
chr1-1173	chr1	64795411	64795543	6.93	1.02e-07	8.76	6.93e-09
chr1-1174	chr1	64918834	64918966	6.93	1.02e-07	12.15	1.44e-10
chr1-1175	chr1	66692809	66692941	12.79	3.81e-10	9.34	1.29e-08
chr1-1176	chr1	66861880	66862012	6.93	1.02e-07	10.8	5.88e-10
chr1-1178	chr1	73640835	73640967	6.93	1.02e-07	7.77	2.73e-08
chr1-1179	chr1	74119208	74119340	27.7	5.38e-15	12.79	7.76e-11
chr1-118	chr1	179446678	179446810	45.82	4.23e-55	68.4	1.9e-62
chr1-1182	chr1	74455756	74455888	27.7	5.38e-15	29.45	2.5e-15
chr1-1184	chr1	74808155	74808287	13.85	2.75e-11	15.43	7.48e-12
chr1-1185	chr1	78761441	78761573	6.39	7.13e-07	18.69	5.39e-12
chr1-1186	chr1	79598855	79598987	27.7	5.38e-15	27.77	5.22e-15
chr1-1187	chr1	81220046	81220178	27.7	5.38e-15	26.27	1.05e-14
chr1-1188	chr1	82634689	82634821	12.79	3.81e-10	18.69	5.39e-12
chr1-1189	chr1	85894509	85894641	5.86	4.62e-06	8.48	1.35e-07
chr1-119	chr1	25996794	25996926	85.24	5.51e-62	76.67	3.62e-60
chr1-1190	chr1	87313986	87314118	25.57	1.49e-13	18.69	5.39e-12
chr1-1191	chr1	87458203	87458335	13.85	2.75e-11	31.35	1.14e-15
chr1-1192	chr1	88937459	88937591	12.79	3.81e-10	15.74	3.76e-11
chr1-1196	chr1	90775659	90775791	7.46	1.35e-08	14.14	3.7e-12
chr1-1197	chr1	91182204	91182336	13.85	2.75e-11	8.68	7.69e-09
chr1-1198	chr1	91239231	91239363	6.93	1.02e-07	23.7	3.77e-14
chr1-1199	chr1	91298374	91298506	13.85	2.75e-11	12.15	1.44e-10
chr1-12	chr1	143080453	143080585	90.57	6.32e-132	115.53	7.96e-141
chr1-120	chr1	42713456	42713588	10.39	3.23e-26	25.13	2.99e-40
chr1-1200	chr1	91398916	91399048	6.93	1.02e-07	12.15	1.44e-10
chr1-1201	chr1	91494474	91494606	6.39	7.13e-07	14.24	1.15e-10
chr1-1202	chr1	91540597	91540729	25.57	1.49e-13	10.94	2.31e-09
chr1-1204	chr1	92098575	92098707	13.85	2.75e-11	6.66	1.59e-07
chr1-1206	chr1	92174682	92174814	13.85	2.75e-11	12.79	7.76e-11
chr1-1207	chr1	92180994	92181126	6.93	1.02e-07	6.52	2e-07
chr1-1209	chr1	92438071	92438203	25.57	1.49e-13	11.36	1.53e-09
chr1-121	chr1	73998802	73998934	42.62	3.79e-50	33.98	2.65e-46
chr1-1210	chr1	92473722	92473854	6.93	1.02e-07	18.69	7.15e-13
chr1-1212	chr1	97833864	97833996	25.57	1.49e-13	20.39	2e-12
chr1-1213	chr1	104828218	104828350	27.7	5.38e-15	17.05	2.21e-12
chr1-1215	chr1	125639750	125639882	6.93	1.02e-07	19.06	5.63e-13
chr1-1216	chr1	126431774	126431906	27.7	5.38e-15	29.45	2.5e-15
chr1-1217	chr1	127239878	127240010	6.39	7.13e-07	16.02	3.08e-11
chr1-1219	chr1	131063117	131063249	6.93	1.02e-07	12.79	7.76e-11
chr1-122	chr1	86032406	86032538	10.12	3.36e-25	29.29	1.07e-41
chr1-1220	chr1	131461351	131461483	12.79	3.81e-10	18.69	5.39e-12
chr1-1222	chr1	132430866	132430998	11.72	4.88e-09	16.12	1.89e-10
chr1-1224	chr1	132917651	132917783	12.79	3.81e-10	10.81	2.64e-09
chr1-1225	chr1	134038471	134038603	25.57	1.49e-13	14.95	6.68e-11
chr1-1226	chr1	134046070	134046202	4.62	8.38e-06	10.34	9.85e-10
chr1-1228	chr1	134233173	134233305	4.97	1.66e-06	7.87	6.98e-09
chr1-1229	chr1	134332836	134332968	13.85	2.75e-11	13.69	3.18e-11
chr1-123	chr1	106241169	106241301	42.62	3.79e-50	32.5	1.49e-45
chr1-1230	chr1	135147362	135147494	11.72	4.88e-09	7.98	2.42e-07
chr1-1232	chr1	135430576	135430708	4.62	8.38e-06	11.71	2.24e-10
chr1-1233	chr1	135515371	135515503	6.93	1.02e-07	7.97	2.07e-08
chr1-1234	chr1	135734776	135734908	4.62	8.38e-06	9.62	2.3e-09
chr1-1235	chr1	136381352	136381484	23.44	3.81e-12	13.71	9.99e-10
chr1-1236	chr1	136455994	136456126	6.39	7.13e-07	8.71	2.75e-08
chr1-1237	chr1	136466208	136466340	13.85	2.75e-11	11.43	2.97e-10
chr1-1238	chr1	136730663	136730795	25.57	1.49e-13	21.36	1.18e-12
chr1-1239	chr1	136782336	136782468	13.85	2.75e-11	12.79	7.76e-11
chr1-124	chr1	152165549	152165681	20.24	7.59e-36	23.87	1.91e-38
chr1-1240	chr1	137255255	137255387	27.7	5.38e-15	19.06	5.63e-13
chr1-1242	chr1	139232694	139232826	5.86	4.62e-06	12.85	1.93e-09
chr1-1243	chr1	151343041	151343173	6.39	7.13e-07	7.23	1.97e-07
chr1-1244	chr1	152817079	152817211	12.79	3.81e-10	6.65	4.78e-07
chr1-1245	chr1	153011644	153011776	4.26	3.94e-05	6.75	4.1e-07
chr1-1247	chr1	154202775	154202907	6.93	1.02e-07	29.45	2.5e-15
chr1-1248	chr1	154820148	154820280	12.79	3.81e-10	20.39	2e-12
chr1-1249	chr1	155158740	155158872	4.26	3.94e-05	11.21	1.76e-09
chr1-125	chr1	169051555	169051687	21.84	7.82e-40	32.26	1.6e-46
chr1-1250	chr1	155159159	155159291	4.26	3.94e-05	11.65	1.15e-09
chr1-1253	chr1	156674560	156674692	12.79	3.81e-10	11.08	2.02e-09
chr1-1254	chr1	157039683	157039815	12.79	3.81e-10	7.23	1.97e-07
chr1-1255	chr1	157828055	157828187	4.97	1.66e-06	22.75	6.92e-15
chr1-1258	chr1	162081826	162081958	4.62	8.38e-06	13.13	5.23e-11
chr1-1259	chr1	162209582	162209714	25.57	1.49e-13	14.24	1.15e-10
chr1-126	chr1	190979214	190979346	87.37	6.31e-64	43.79	7.91e-52
chr1-1260	chr1	162548590	162548722	6.93	1.02e-07	13.31	4.44e-11
chr1-1263	chr1	166885545	166885677	12.79	3.81e-10	26.39	1.04e-13
chr1-1265	chr1	168180699	168180831	12.79	3.81e-10	19.5	3.32e-12
chr1-1267	chr1	168245684	168245816	6.93	1.02e-07	14.72	1.31e-11
chr1-1268	chr1	168358433	168358565	27.7	5.38e-15	10.92	5.15e-10
chr1-127	chr1	20867683	20867815	42.62	3.79e-50	34.77	1.08e-46
chr1-1270	chr1	171411482	171411614	4.26	3.94e-05	8.38	4.14e-08
chr1-1271	chr1	172148134	172148266	4.26	3.94e-05	10.68	3.01e-09
chr1-1272	chr1	172242569	172242701	14.92	1.85e-12	18.04	1.51e-13
chr1-1275	chr1	172412352	172412484	4.62	8.38e-06	19.83	3.44e-13
chr1-1277	chr1	176849490	176849622	25.57	1.49e-13	16.93	1.66e-11
chr1-128	chr1	30949854	30949986	80.98	3.91e-58	26.06	7.73e-40
chr1-1281	chr1	182409169	182409301	6.39	7.13e-07	10.19	5e-09
chr1-1282	chr1	183388929	183389061	4.62	8.38e-06	21.13	1.57e-13
chr1-1285	chr1	184748688	184748820	6.93	1.02e-07	17.35	1.78e-12
chr1-1288	chr1	187684644	187684776	25.57	1.49e-13	22.43	6.73e-13
chr1-1289	chr1	189228757	189228889	13.85	2.75e-11	15.43	7.48e-12
chr1-129	chr1	54585653	54585785	83.11	4.7e-60	52.06	2.96e-52
chr1-1291	chr1	193151255	193151387	13.85	2.75e-11	14.51	1.58e-11
chr1-1292	chr1	193433624	193433756	6.93	1.02e-07	19.44	4.41e-13
chr1-1294	chr1	13936068	13936200	11.72	4.88e-09	13.26	1.4e-09
chr1-1295	chr1	14011674	14011806	4.26	3.94e-05	25.63	1.45e-13
chr1-1296	chr1	16105722	16105854	23.44	3.81e-12	7.98	2.42e-07
chr1-1297	chr1	19850090	19850222	12.79	3.81e-10	34.5	4.62e-15
chr1-1298	chr1	21593979	21594111	25.57	1.49e-13	37.38	1.82e-15
chr1-1299	chr1	22594936	22595068	6.39	7.13e-07	34.5	4.62e-15
chr1-13	chr1	135741236	135741368	46.35	4.6e-110	55.59	8.48e-117
chr1-130	chr1	72307319	72307451	7.88	5.28e-21	46.88	5.19e-48
chr1-1300	chr1	22615242	22615374	25.57	1.49e-13	28.94	3.56e-14
chr1-1303	chr1	33814154	33814286	5.86	4.62e-06	10.28	1.99e-08
chr1-1304	chr1	34183615	34183747	12.79	3.81e-10	15.47	4.57e-11
chr1-1305	chr1	35469326	35469458	11.72	4.88e-09	13.26	1.4e-09
chr1-1307	chr1	37513041	37513173	4.26	3.94e-05	12.64	4.35e-10
chr1-1308	chr1	38198574	38198706	23.44	3.81e-12	12.09	3.56e-09
chr1-131	chr1	74111435	74111567	7.88	5.28e-21	22.49	1.47e-36
chr1-1310	chr1	39001224	39001356	4.26	3.94e-05	27.18	7.35e-14
chr1-1312	chr1	42678766	42678898	11.72	4.88e-09	20.56	1.51e-11
chr1-1318	chr1	43714917	43715049	6.39	7.13e-07	13.39	2.29e-10
chr1-1319	chr1	43774008	43774140	4.26	3.94e-05	16.61	2.05e-11
chr1-132	chr1	82150897	82151029	20.24	7.59e-36	54.63	9.74e-52
chr1-1322	chr1	52233238	52233370	5.86	4.62e-06	10.28	1.99e-08
chr1-1325	chr1	57634148	57634280	11.72	4.88e-09	18.69	4.08e-11
chr1-1328	chr1	61198683	61198815	25.57	1.49e-13	11.36	1.53e-09
chr1-1329	chr1	62582515	62582647	6.39	7.13e-07	16.61	2.05e-11
chr1-133	chr1	82243434	82243566	7.67	4.18e-20	36.37	6.92e-43
chr1-1332	chr1	66862992	66863124	5.86	4.62e-06	8.75	9.88e-08
chr1-1333	chr1	69157514	69157646	9.59	6.09e-07	14.02	2.69e-08
chr1-1335	chr1	69508168	69508300	25.57	1.49e-13	21.88	8.93e-13
chr1-1336	chr1	70853489	70853621	12.79	3.81e-10	21.88	8.93e-13
chr1-1337	chr1	72751407	72751539	11.72	4.88e-09	11.26	7.26e-09
chr1-134	chr1	159686512	159686644	13.5	1.5e-29	41.17	3.61e-47
chr1-1342	chr1	74303993	74304125	5.33	2.75e-05	9.34	2.06e-07
chr1-1343	chr1	74313394	74313526	12.79	3.81e-10	14.95	6.68e-11
chr1-1345	chr1	75399998	75400130	5.86	4.62e-06	10.68	1.35e-08
chr1-1346	chr1	77226679	77226811	11.72	4.88e-09	17.88	6.48e-11
chr1-1348	chr1	78657814	78657946	11.72	4.88e-09	9.45	4.59e-08
chr1-135	chr1	165302928	165303060	20.78	3.65e-37	56.07	1.74e-53
chr1-1350	chr1	79761718	79761850	5.86	4.62e-06	12.27	3.06e-09
chr1-1351	chr1	82291222	82291354	6.39	7.13e-07	6.85	3.5e-07
chr1-1354	chr1	82429134	82429266	5.86	4.62e-06	13.26	1.4e-09
chr1-1356	chr1	84585564	84585696	6.93	1.02e-07	13.88	2.68e-11
chr1-1359	chr1	85743003	85743135	23.44	3.81e-12	20.56	1.51e-11
chr1-136	chr1	169485757	169485889	39.42	2.72e-45	19.9	1.1e-34
chr1-1360	chr1	86154659	86154791	4.26	3.94e-05	18.31	6.82e-12
chr1-1362	chr1	86705576	86705708	12.79	3.81e-10	9.86	7.21e-09
chr1-1363	chr1	87035836	87035968	25.57	1.49e-13	13.59	1.94e-10
chr1-1365	chr1	88668987	88669119	11.72	4.88e-09	16.78	1.25e-10
chr1-1367	chr1	88745344	88745476	6.39	7.13e-07	13.39	2.29e-10
chr1-1368	chr1	89196199	89196331	4.62	8.38e-06	18.69	7.15e-13
chr1-1369	chr1	89454874	89455006	12.79	3.81e-10	9.65	9.13e-09
chr1-137	chr1	36309585	36309717	78.85	3.16e-56	23.24	4.56e-37
chr1-1371	chr1	89550222	89550354	6.39	7.13e-07	15.47	4.57e-11
chr1-1373	chr1	89688943	89689075	11.72	4.88e-09	17.5	8.1e-11
chr1-1374	chr1	90232547	90232679	5.33	2.75e-05	6.23	7.34e-06
chr1-1375	chr1	91903770	91903902	6.39	7.13e-07	11.8	9.98e-10
chr1-1376	chr1	91978572	91978704	4.26	3.94e-05	16.31	2.52e-11
chr1-1378	chr1	92641959	92642091	11.72	4.88e-09	16.78	1.25e-10
chr1-138	chr1	36557146	36557278	6.75	2.67e-19	13.46	1.63e-29
chr1-1380	chr1	92910593	92910725	10.65	5.72e-08	7.33	1.79e-06
chr1-1381	chr1	93217227	93217359	11.72	4.88e-09	7.15	7.03e-07
chr1-1382	chr1	93636128	93636260	12.79	3.81e-10	11.65	1.15e-09
chr1-1383	chr1	97976923	97977055	23.44	3.81e-12	16.12	1.89e-10
chr1-1384	chr1	102628203	102628335	4.62	8.38e-06	74.76	1.79e-20
chr1-1387	chr1	112380053	112380185	11.72	4.88e-09	17.5	8.1e-11
chr1-1388	chr1	118321716	118321848	4.26	3.94e-05	13.39	2.29e-10
chr1-1389	chr1	118759709	118759841	11.72	4.88e-09	21.09	1.16e-11
chr1-139	chr1	36949606	36949738	12.79	2.66e-27	41.4	7.33e-45
chr1-1390	chr1	119388774	119388906	6.39	7.13e-07	6.85	3.5e-07
chr1-1392	chr1	119879077	119879209	25.57	1.49e-13	14.24	1.15e-10
chr1-1393	chr1	120093625	120093757	5.86	4.62e-06	19.12	3.21e-11
chr1-1395	chr1	125455169	125455301	21.31	8.93e-11	12.89	1e-08
chr1-1396	chr1	126656232	126656364	4.26	3.94e-05	7.54	1.28e-07
chr1-1397	chr1	127414632	127414764	12.79	3.81e-10	16.93	1.66e-11
chr1-14	chr1	170424697	170424829	44.22	1.98e-103	73.87	1.33e-121
chr1-140	chr1	61913084	61913216	72.45	1.43e-50	42.36	8.59e-43
chr1-1400	chr1	128585983	128586115	11.72	4.88e-09	11.26	7.26e-09
chr1-1401	chr1	131053374	131053506	6.39	7.13e-07	12.46	5.08e-10
chr1-1402	chr1	131354144	131354276	11.72	4.88e-09	11.26	7.26e-09
chr1-1404	chr1	131752174	131752306	12.79	3.81e-10	10.68	3.01e-09
chr1-1405	chr1	132144351	132144483	4.26	3.94e-05	16.61	2.05e-11
chr1-1409	chr1	132317530	132317662	12.79	3.81e-10	6.19	9.98e-07
chr1-141	chr1	71540608	71540740	41.55	1.62e-48	60.74	8.08e-55
chr1-1410	chr1	133046480	133046612	5.86	4.62e-06	9.34	5.14e-08
chr1-1411	chr1	133069042	133069174	11.72	4.88e-09	7.69	3.51e-07
chr1-1412	chr1	133177588	133177720	4.26	3.94e-05	8.23	5.05e-08
chr1-1413	chr1	133306961	133307093	12.79	3.81e-10	16.02	3.08e-11
chr1-1414	chr1	133434433	133434565	12.79	3.81e-10	19.94	2.59e-12
chr1-142	chr1	87785851	87785983	13.5	1.5e-29	23.67	2.59e-38
chr1-1421	chr1	135518648	135518780	4.26	3.94e-05	8.38	4.14e-08
chr1-1423	chr1	135677063	135677195	12.79	3.81e-10	10.43	3.89e-09
chr1-1424	chr1	135681282	135681414	6.39	7.13e-07	11.36	1.53e-09
chr1-1427	chr1	135802166	135802298	11.72	4.88e-09	15.23	3.4e-10
chr1-1428	chr1	136345585	136345717	6.39	7.13e-07	8.46	3.74e-08
chr1-1429	chr1	137617526	137617658	12.79	3.81e-10	24.25	2.75e-13
chr1-143	chr1	94503875	94504007	20.24	7.59e-36	41.78	2.1e-47
chr1-1430	chr1	137657276	137657408	13.85	2.75e-11	12.62	9.08e-11
chr1-1431	chr1	138029753	138029885	11.72	4.88e-09	21.09	1.16e-11
chr1-1433	chr1	139209924	139210056	6.39	7.13e-07	16.31	2.52e-11
chr1-1435	chr1	150942196	150942328	5.86	4.62e-06	13.71	9.99e-10
chr1-1436	chr1	151852118	151852250	25.57	1.49e-13	23.61	3.74e-13
chr1-1437	chr1	152625232	152625364	4.26	3.94e-05	10.31	4.42e-09
chr1-1438	chr1	153033205	153033337	6.39	7.13e-07	7.35	1.66e-07
chr1-1439	chr1	153059916	153060048	11.72	4.88e-09	16.12	1.89e-10
chr1-144	chr1	134096385	134096517	19.18	3.04e-33	13.52	4.1e-28
chr1-1440	chr1	153107875	153108007	11.72	4.88e-09	16.78	1.25e-10
chr1-1441	chr1	154786344	154786476	5.86	4.62e-06	14.95	4.1e-10
chr1-1442	chr1	155114133	155114265	5.33	2.75e-05	8.8	3.56e-07
chr1-1443	chr1	155557981	155558113	5.86	4.62e-06	16.78	1.25e-10
chr1-1444	chr1	156241845	156241977	12.79	3.81e-10	24.25	2.75e-13
chr1-1445	chr1	156931241	156931373	23.44	3.81e-12	16.45	1.54e-10
chr1-1446	chr1	157114636	157114768	5.86	4.62e-06	13.94	8.42e-10
chr1-1447	chr1	158356341	158356473	6.39	7.13e-07	9.54	1.03e-08
chr1-1448	chr1	158860301	158860433	25.57	1.49e-13	26.39	1.04e-13
chr1-145	chr1	134265934	134266066	10.39	3.23e-26	56.07	1.74e-53
chr1-1450	chr1	159690278	159690410	12.79	3.81e-10	9.44	1.15e-08
chr1-1453	chr1	161273592	161273724	5.86	4.62e-06	19.12	3.21e-11
chr1-1454	chr1	165236815	165236947	4.26	3.94e-05	11.96	8.62e-10
chr1-1457	chr1	168382966	168383098	12.79	3.81e-10	13.19	2.7e-10
chr1-1458	chr1	168550200	168550332	23.44	3.81e-12	17.13	1.01e-10
chr1-1459	chr1	170295280	170295412	6.39	7.13e-07	13.8	1.63e-10
chr1-146	chr1	160531469	160531601	38.36	1.07e-43	37.38	2.65e-43
chr1-1461	chr1	171102674	171102806	6.39	7.13e-07	9.34	1.29e-08
chr1-1462	chr1	171661837	171661969	23.44	3.81e-12	30.46	2.38e-13
chr1-1464	chr1	172847469	172847601	25.57	1.49e-13	28.94	3.56e-14
chr1-1465	chr1	175330112	175330244	25.57	1.49e-13	20.39	2e-12
chr1-1467	chr1	177573489	177573621	4.26	3.94e-05	25.63	1.45e-13
chr1-1468	chr1	178463916	178464048	25.57	1.49e-13	18.69	5.39e-12
chr1-1469	chr1	179146931	179147063	6.39	7.13e-07	16.61	2.05e-11
chr1-147	chr1	183140717	183140849	41.55	1.62e-48	45.56	4.86e-50
chr1-1470	chr1	179517747	179517879	6.39	7.13e-07	11.96	8.62e-10
chr1-1471	chr1	179645809	179645941	11.72	4.88e-09	17.5	8.1e-11
chr1-1476	chr1	183048060	183048192	23.44	3.81e-12	6.09	3.22e-06
chr1-1477	chr1	184441076	184441208	5.86	4.62e-06	13.94	8.42e-10
chr1-1478	chr1	184845944	184846076	11.72	4.88e-09	11.11	8.32e-09
chr1-1479	chr1	185493821	185493953	11.72	4.88e-09	14.18	7.07e-10
chr1-148	chr1	191292561	191292693	18.65	5.83e-32	21.8	3.18e-34
chr1-1480	chr1	185572733	185572865	12.79	3.81e-10	20.39	2e-12
chr1-1481	chr1	185681589	185681721	5.86	4.62e-06	13.26	1.4e-09
chr1-1482	chr1	187907938	187908070	5.86	4.62e-06	17.5	8.1e-11
chr1-1483	chr1	188661019	188661151	6.39	7.13e-07	14.95	6.68e-11
chr1-1484	chr1	188948419	188948551	5.86	4.62e-06	17.88	6.48e-11
chr1-1485	chr1	189007839	189007971	6.39	7.13e-07	21.88	8.93e-13
chr1-1486	chr1	189015491	189015623	5.86	4.62e-06	25.7	1.44e-12
chr1-1487	chr1	189727955	189728087	23.44	3.81e-12	7.28	5.94e-07
chr1-1488	chr1	191025606	191025738	6.39	7.13e-07	11.08	2.02e-09
chr1-149	chr1	59516363	59516495	12.79	2.66e-27	24.25	9.6e-37
chr1-1490	chr1	193173147	193173279	5.86	4.62e-06	7.61	3.84e-07
chr1-1493	chr1	193693157	193693289	12.79	3.81e-10	14.24	1.15e-10
chr1-1494	chr1	193738939	193739071	12.79	3.81e-10	19.94	2.59e-12
chr1-1495	chr1	193949882	193950014	11.72	4.88e-09	18.27	5.16e-11
chr1-1496	chr1	194678026	194678158	25.57	1.49e-13	9.25	1.44e-08
chr1-1498	chr1	4571927	4572059	21.31	8.93e-11	19.67	1.91e-10
chr1-15	chr1	97540845	97540977	45.28	9.78e-107	74.76	6.34e-125
chr1-150	chr1	75234687	75234819	12.08	4.25e-25	31.77	1.2e-38
chr1-1500	chr1	6819994	6820126	5.33	2.75e-05	18.69	3.1e-10
chr1-1501	chr1	7089106	7089238	5.86	4.62e-06	7.48	4.58e-07
chr1-1504	chr1	10040137	10040269	5.33	2.75e-05	6.23	7.34e-06
chr1-1505	chr1	12000580	12000712	23.44	3.81e-12	22.23	6.67e-12
chr1-1506	chr1	12016841	12016973	27.7	5.38e-15	35.99	1.99e-16
chr1-1509	chr1	13171263	13171395	11.72	4.88e-09	20.56	1.51e-11
chr1-151	chr1	80637297	80637429	12.79	2.66e-27	48.06	3.87e-47
chr1-1511	chr1	16618516	16618648	5.33	2.75e-05	9.34	2.06e-07
chr1-1512	chr1	17838522	17838654	11.72	4.88e-09	26.53	1.03e-12
chr1-1513	chr1	20933566	20933698	5.33	2.75e-05	16.99	7.63e-10
chr1-1514	chr1	22805820	22805952	5.86	4.62e-06	16.45	1.54e-10
chr1-1518	chr1	34842449	34842581	11.72	4.88e-09	12.27	3.06e-09
chr1-152	chr1	165046666	165046798	38.36	1.07e-43	42.72	2.44e-45
chr1-1521	chr1	36445282	36445414	4.26	3.94e-05	24.25	2.75e-13
chr1-1522	chr1	36475602	36475734	5.86	4.62e-06	8.84	8.89e-08
chr1-1523	chr1	36603413	36603545	5.86	4.62e-06	8.22	1.81e-07
chr1-1526	chr1	39367781	39367913	5.33	2.75e-05	9.58	1.64e-07
chr1-1528	chr1	41888366	41888498	5.33	2.75e-05	19.67	1.91e-10
chr1-153	chr1	168216246	168216378	4.53	1.38e-12	27.93	8.31e-37
chr1-1530	chr1	42923972	42924104	11.72	4.88e-09	11.58	5.5e-09
chr1-1531	chr1	43446679	43446811	10.65	5.72e-08	8.13	7.21e-07
chr1-1532	chr1	44102377	44102509	21.31	8.93e-11	10.1	9.25e-08
chr1-1534	chr1	51636804	51636936	23.44	3.81e-12	16.78	1.25e-10
chr1-1535	chr1	51879354	51879486	5.86	4.62e-06	17.5	8.1e-11
chr1-1536	chr1	51976725	51976857	10.65	5.72e-08	23.36	3.71e-11
chr1-1537	chr1	52146676	52146808	23.44	3.81e-12	20.56	1.51e-11
chr1-1539	chr1	53038402	53038534	21.31	8.93e-11	22.65	4.98e-11
chr1-154	chr1	186655329	186655461	37.29	4.11e-42	26.7	3.53e-37
chr1-1540	chr1	53352742	53352874	10.65	5.72e-08	31.15	2.32e-12
chr1-1541	chr1	53785112	53785244	5.33	2.75e-05	17.39	6.15e-10
chr1-1542	chr1	54735077	54735209	23.44	3.81e-12	16.45	1.54e-10
chr1-1543	chr1	54826753	54826885	17.05	3.65e-08	9.34	3.04e-06
chr1-1545	chr1	55874267	55874399	11.72	4.88e-09	19.58	2.51e-11
chr1-1546	chr1	58029610	58029742	5.86	4.62e-06	7.15	7.03e-07
chr1-1547	chr1	58423562	58423694	19.18	1.9e-09	7.56	4.56e-06
chr1-1549	chr1	59309256	59309388	5.86	4.62e-06	16.78	1.25e-10
chr1-155	chr1	35869744	35869876	36.23	1.53e-40	57.77	2.8e-47
chr1-1550	chr1	59524203	59524335	23.44	3.81e-12	14.43	5.92e-10
chr1-1551	chr1	60931439	60931571	21.31	8.93e-11	24.92	2e-11
chr1-1554	chr1	62665014	62665146	11.72	4.88e-09	13.71	9.99e-10
chr1-1555	chr1	62701054	62701186	5.33	2.75e-05	7.63	1.26e-06
chr1-1556	chr1	62786404	62786536	10.65	5.72e-08	8.4	5.37e-07
chr1-1558	chr1	64295851	64295983	11.72	4.88e-09	16.78	1.25e-10
chr1-156	chr1	80237565	80237697	72.45	1.43e-50	27.33	1.7e-36
chr1-1560	chr1	64537920	64538052	19.18	1.9e-09	8.85	1.29e-06
chr1-1561	chr1	64737503	64737635	11.72	4.88e-09	8.39	1.49e-07
chr1-1566	chr1	72033712	72033844	23.44	3.81e-12	25.7	1.44e-12
chr1-1568	chr1	72226322	72226454	23.44	3.81e-12	7.69	3.51e-07
chr1-1569	chr1	72859083	72859215	23.44	3.81e-12	10.96	1.04e-08
chr1-157	chr1	121177314	121177446	36.23	1.53e-40	32.17	7.93e-39
chr1-1573	chr1	74094639	74094771	5.33	2.75e-05	7.79	1.05e-06
chr1-1575	chr1	74343442	74343574	5.86	4.62e-06	10.68	1.35e-08
chr1-1576	chr1	75210888	75211020	5.86	4.62e-06	13.71	9.99e-10
chr1-1577	chr1	75505639	75505771	4.26	3.94e-05	12.12	6.87e-10
chr1-1578	chr1	76942741	76942873	4.26	3.94e-05	16.93	1.66e-11
chr1-158	chr1	128561370	128561502	76.72	2.49e-54	34.07	7.02e-42
chr1-1581	chr1	77410287	77410419	21.31	8.93e-11	11.5	2.85e-08
chr1-1582	chr1	78536881	78537013	11.72	4.88e-09	13.71	9.99e-10
chr1-1584	chr1	80218447	80218579	5.86	4.62e-06	17.88	6.48e-11
chr1-1585	chr1	80656419	80656551	9.59	6.09e-07	8.97	1.16e-06
chr1-1586	chr1	80758417	80758549	10.65	5.72e-08	13.59	6.13e-09
chr1-1587	chr1	81301816	81301948	5.33	2.75e-05	18.69	3.1e-10
chr1-1588	chr1	82294292	82294424	5.86	4.62e-06	6.97	9e-07
chr1-1589	chr1	84217955	84218087	11.72	4.88e-09	16.45	1.54e-10
chr1-159	chr1	135158729	135158861	38.36	1.07e-43	8.91	3.58e-22
chr1-1590	chr1	84443689	84443821	10.65	5.72e-08	18.69	3.1e-10
chr1-1593	chr1	85793341	85793473	21.31	8.93e-11	12.06	1.85e-08
chr1-1596	chr1	86421112	86421244	11.72	4.88e-09	20.56	1.51e-11
chr1-1598	chr1	86582823	86582955	5.86	4.62e-06	10.96	1.04e-08
chr1-16	chr1	131078969	131079101	22.91	2.58e-83	42.02	3.06e-105
chr1-160	chr1	160856007	160856139	37.29	4.11e-42	49.37	2.82e-46
chr1-1600	chr1	88623627	88623759	5.33	2.75e-05	13.12	8.54e-09
chr1-1603	chr1	89880880	89881012	5.86	4.62e-06	10.82	1.19e-08
chr1-1604	chr1	89887484	89887616	5.86	4.62e-06	12.09	3.56e-09
chr1-161	chr1	194613597	194613729	9.32	3.24e-22	28.44	4.18e-38
chr1-1611	chr1	92092489	92092621	11.72	4.88e-09	13.26	1.4e-09
chr1-1612	chr1	92124891	92125023	11.72	4.88e-09	20.56	1.51e-11
chr1-1613	chr1	92744897	92745029	10.65	5.72e-08	9.84	1.29e-07
chr1-1614	chr1	92831729	92831861	5.33	2.75e-05	6.18	7.88e-06
chr1-1615	chr1	92832772	92832904	11.72	4.88e-09	6.8	1.14e-06
chr1-1616	chr1	93479509	93479641	10.65	5.72e-08	6.08	9.07e-06
chr1-1617	chr1	93685416	93685548	19.18	1.9e-09	7.48	4.99e-06
chr1-1618	chr1	93801806	93801938	10.65	5.72e-08	6.99	2.73e-06
chr1-1619	chr1	93803448	93803580	21.31	8.93e-11	7.05	2.51e-06
chr1-162	chr1	64655535	64655667	36.23	1.53e-40	34.35	8.9e-40
chr1-1620	chr1	100180132	100180264	4.97	1.66e-06	87.22	7.37e-23
chr1-1622	chr1	106232542	106232674	23.44	3.81e-12	13.48	1.18e-09
chr1-1623	chr1	106380556	106380688	23.44	3.81e-12	16.78	1.25e-10
chr1-1624	chr1	106713977	106714109	5.33	2.75e-05	8.59	4.38e-07
chr1-1626	chr1	108102446	108102578	11.72	4.88e-09	37.38	2.68e-14
chr1-1627	chr1	108452833	108452965	12.79	3.81e-10	30.93	1.64e-14
chr1-1628	chr1	118481419	118481551	5.86	4.62e-06	15.52	2.8e-10
chr1-163	chr1	79776001	79776133	4.53	1.38e-12	72.62	1.32e-50
chr1-1631	chr1	126046300	126046432	21.31	8.93e-11	18.69	3.1e-10
chr1-1635	chr1	130715566	130715698	11.72	4.88e-09	7.41	5e-07
chr1-1636	chr1	130716956	130717088	6.39	7.13e-07	8.38	4.14e-08
chr1-1638	chr1	131181778	131181910	10.65	5.72e-08	13.12	8.54e-09
chr1-164	chr1	91209918	91210050	36.23	1.53e-40	10.46	3.69e-23
chr1-1641	chr1	131937781	131937913	10.65	5.72e-08	10.99	4.3e-08
chr1-1643	chr1	132046490	132046622	11.72	4.88e-09	23.5	3.72e-12
chr1-1645	chr1	132326976	132327108	5.33	2.75e-05	7.4	1.65e-06
chr1-1649	chr1	133057463	133057595	5.86	4.62e-06	19.12	3.21e-11
chr1-165	chr1	119033941	119034073	36.23	1.53e-40	23.98	1.22e-34
chr1-1652	chr1	133356784	133356916	21.31	8.93e-11	8.59	4.38e-07
chr1-1654	chr1	134302540	134302672	25.57	1.49e-13	16.02	3.08e-11
chr1-1657	chr1	135543271	135543403	21.31	8.93e-11	6.92	2.96e-06
chr1-1658	chr1	135616033	135616165	11.72	4.88e-09	11.75	4.76e-09
chr1-1659	chr1	135688323	135688455	11.72	4.88e-09	6.48	1.81e-06
chr1-166	chr1	120115899	120116031	9.06	3.03e-21	16.09	4.89e-29
chr1-1662	chr1	136076240	136076372	5.86	4.62e-06	18.69	4.08e-11
chr1-1665	chr1	136415169	136415301	5.86	4.62e-06	12.85	1.93e-09
chr1-1666	chr1	136456433	136456565	10.65	5.72e-08	6.86	3.2e-06
chr1-1667	chr1	136624877	136625009	10.65	5.72e-08	9.12	2.57e-07
chr1-167	chr1	156754641	156754773	17.58	1.98e-29	29.37	1.81e-36
chr1-1674	chr1	143640690	143640822	9.59	6.09e-07	10.04	4.2e-07
chr1-1675	chr1	144004408	144004540	5.86	4.62e-06	7.83	2.92e-07
chr1-1676	chr1	144299726	144299858	10.65	5.72e-08	23.36	3.71e-11
chr1-168	chr1	170459966	170460098	18.11	1.09e-30	39.71	7.31e-42
chr1-1680	chr1	150546129	150546261	13.85	2.75e-11	31.35	1.14e-15
chr1-1681	chr1	151344519	151344651	5.33	2.75e-05	6.92	2.96e-06
chr1-1682	chr1	151890442	151890574	5.86	4.62e-06	11.92	4.12e-09
chr1-1683	chr1	151957784	151957916	5.86	4.62e-06	10.82	1.19e-08
chr1-1685	chr1	152414852	152414984	10.65	5.72e-08	8.69	3.95e-07
chr1-1688	chr1	152766241	152766373	11.72	4.88e-09	9.24	5.75e-08
chr1-169	chr1	4857616	4857748	11.72	5.15e-24	32.46	7.4e-38
chr1-1690	chr1	153265087	153265219	6.93	1.02e-07	17.67	1.42e-12
chr1-1691	chr1	153278107	153278239	5.33	2.75e-05	10.53	6.37e-08
chr1-1692	chr1	153594960	153595092	25.57	1.49e-13	16.93	1.66e-11
chr1-1696	chr1	156229586	156229718	4.26	3.94e-05	22.43	6.73e-13
chr1-1697	chr1	157079453	157079585	11.72	4.88e-09	8.75	9.88e-08
chr1-17	chr1	21805127	21805259	32.32	3.72e-101	86.11	3.95e-139
chr1-170	chr1	34696681	34696813	11.72	5.15e-24	27.11	2.32e-35
chr1-1700	chr1	158364653	158364785	23.44	3.81e-12	13.05	1.64e-09
chr1-1702	chr1	158582007	158582139	23.44	3.81e-12	43.28	5.55e-15
chr1-1703	chr1	159232077	159232209	10.65	5.72e-08	12.26	1.59e-08
chr1-1704	chr1	160142242	160142374	5.86	4.62e-06	20.56	1.51e-11
chr1-1706	chr1	161379762	161379894	21.31	8.93e-11	9.84	1.29e-07
chr1-1708	chr1	161607778	161607910	21.31	8.93e-11	19.17	2.44e-10
chr1-1709	chr1	162589602	162589734	23.44	3.81e-12	17.5	8.1e-11
chr1-171	chr1	36244227	36244359	17.05	3.48e-28	31.9	1.59e-36
chr1-1712	chr1	164275554	164275686	10.65	5.72e-08	19.67	1.91e-10
chr1-1714	chr1	164397747	164397879	21.31	8.93e-11	15.91	1.42e-09
chr1-1715	chr1	164899034	164899166	23.44	3.81e-12	16.45	1.54e-10
chr1-1716	chr1	165104775	165104907	23.44	3.81e-12	16.45	1.54e-10
chr1-1717	chr1	165187513	165187645	11.72	4.88e-09	10.03	2.54e-08
chr1-1718	chr1	165498967	165499099	21.31	8.93e-11	11.68	2.48e-08
chr1-172	chr1	37332897	37333029	18.65	5.83e-32	38.48	1.41e-42
chr1-1721	chr1	166024105	166024237	5.86	4.62e-06	32.89	1.05e-13
chr1-1722	chr1	166402219	166402351	23.44	3.81e-12	8.94	7.99e-08
chr1-1723	chr1	167212386	167212518	5.33	2.75e-05	20.2	1.48e-10
chr1-1724	chr1	167308435	167308567	5.86	4.62e-06	13.05	1.64e-09
chr1-1726	chr1	168259099	168259231	11.72	4.88e-09	29.37	3.51e-13
chr1-1727	chr1	169058839	169058971	5.86	4.62e-06	15.81	2.3e-10
chr1-1728	chr1	169362589	169362721	25.57	1.49e-13	16.02	3.08e-11
chr1-1729	chr1	169459522	169459654	5.86	4.62e-06	8.94	7.99e-08
chr1-1730	chr1	170549196	170549328	23.44	3.81e-12	14.95	4.1e-10
chr1-1731	chr1	171038176	171038308	23.44	3.81e-12	7.61	3.84e-07
chr1-1732	chr1	171111382	171111514	23.44	3.81e-12	8.57	1.22e-07
chr1-1733	chr1	171459947	171460079	11.72	4.88e-09	20.06	1.95e-11
chr1-1735	chr1	173344123	173344255	9.59	6.09e-07	15.65	1.07e-08
chr1-1736	chr1	173389950	173390082	11.72	4.88e-09	24.19	2.74e-12
chr1-1738	chr1	177004200	177004332	21.31	8.93e-11	9.12	2.57e-07
chr1-1739	chr1	177014414	177014546	10.65	5.72e-08	8.22	6.54e-07
chr1-174	chr1	88840301	88840433	17.05	3.48e-28	26.88	3.18e-34
chr1-1740	chr1	177441548	177441680	5.86	4.62e-06	6.09	3.22e-06
chr1-1742	chr1	179061822	179061954	5.33	2.75e-05	14.66	3.04e-09
chr1-1743	chr1	179803544	179803676	11.72	4.88e-09	9.04	7.17e-08
chr1-1745	chr1	180330436	180330568	11.72	4.88e-09	8.06	2.2e-07
chr1-175	chr1	128472495	128472627	34.1	1.95e-37	23.69	1.56e-32
chr1-1750	chr1	182053094	182053226	23.44	3.81e-12	14.95	4.1e-10
chr1-1751	chr1	182125189	182125321	23.44	3.81e-12	12.85	1.93e-09
chr1-1752	chr1	182341579	182341711	11.72	4.88e-09	9.45	4.59e-08
chr1-1754	chr1	182951413	182951545	10.65	5.72e-08	16.25	1.16e-09
chr1-1756	chr1	184462608	184462740	11.72	4.88e-09	24.19	2.74e-12
chr1-1757	chr1	187331276	187331408	10.65	5.72e-08	16.61	9.43e-10
chr1-1758	chr1	188468360	188468492	10.65	5.72e-08	17.8	4.92e-10
chr1-1759	chr1	189688218	189688350	5.33	2.75e-05	11.5	2.85e-08
chr1-176	chr1	139346836	139346968	17.58	1.98e-29	17.75	1.47e-29
chr1-1760	chr1	189830789	189830921	19.18	1.9e-09	12.69	6.14e-08
chr1-1761	chr1	190045906	190046038	5.86	4.62e-06	12.46	2.63e-09
chr1-1762	chr1	190128822	190128954	5.86	4.62e-06	12.65	2.25e-09
chr1-1763	chr1	190683281	190683413	11.72	4.88e-09	6.53	1.68e-06
chr1-1764	chr1	190978673	190978805	10.65	5.72e-08	7.26	1.95e-06
chr1-1765	chr1	191062925	191063057	21.31	8.93e-11	15.26	2.09e-09
chr1-1766	chr1	191122888	191123020	21.31	8.93e-11	8.59	4.38e-07
chr1-1767	chr1	191224859	191224991	5.86	4.62e-06	10.28	1.99e-08
chr1-1769	chr1	191352931	191353063	21.31	8.93e-11	16.25	1.16e-09
chr1-177	chr1	161876882	161877014	6.61	8.5e-16	31.75	2.19e-35
chr1-1771	chr1	191834907	191835039	5.33	2.75e-05	14.38	3.64e-09
chr1-1772	chr1	192061667	192061799	10.65	5.72e-08	17.39	6.15e-10
chr1-1775	chr1	193345065	193345197	10.65	5.72e-08	10.1	9.25e-08
chr1-1777	chr1	193677680	193677812	5.86	4.62e-06	19.58	2.51e-11
chr1-1778	chr1	194239925	194240057	23.44	3.81e-12	20.06	1.95e-11
chr1-1779	chr1	194361525	194361657	21.31	8.93e-11	12.26	1.59e-08
chr1-178	chr1	183072430	183072562	11.72	5.15e-24	34.75	8.12e-39
chr1-1780	chr1	194658495	194658627	10.65	5.72e-08	12.46	1.37e-08
chr1-1781	chr1	194897078	194897210	21.31	8.93e-11	18.23	3.92e-10
chr1-1782	chr1	4571575	4571707	9.59	6.09e-07	17.71	3.76e-09
chr1-1784	chr1	5015485	5015617	19.18	1.9e-09	7.39	5.44e-06
chr1-1786	chr1	6483453	6483585	10.65	5.72e-08	17.39	6.15e-10
chr1-1787	chr1	6805089	6805221	5.33	2.75e-05	13.59	6.13e-09
chr1-1788	chr1	9570321	9570453	5.33	2.75e-05	8.8	3.56e-07
chr1-1789	chr1	9611655	9611787	5.33	2.75e-05	14.11	4.35e-09
chr1-179	chr1	14181639	14181771	34.1	1.95e-37	19.29	8.21e-30
chr1-1796	chr1	21829789	21829921	19.18	1.9e-09	8.31	2.15e-06
chr1-1797	chr1	21961338	21961470	21.31	8.93e-11	9.58	1.64e-07
chr1-1798	chr1	23202997	23203129	21.31	8.93e-11	13.59	6.13e-09
chr1-18	chr1	64122223	64122355	45.28	9.78e-107	33.62	5.06e-96
chr1-180	chr1	58445436	58445568	16.52	5.94e-27	19.47	4.73e-29
chr1-1800	chr1	23762932	23763064	21.31	8.93e-11	7.95	8.73e-07
chr1-1801	chr1	23764888	23765020	10.65	5.72e-08	7.95	8.73e-07
chr1-1802	chr1	24005635	24005767	5.33	2.75e-05	13.59	6.13e-09
chr1-1804	chr1	25824716	25824848	8.52	5.84e-06	7.04	2.54e-05
chr1-1805	chr1	31154098	31154230	5.33	2.75e-05	21.99	6.62e-11
chr1-1807	chr1	33932923	33933055	21.31	8.93e-11	12.26	1.59e-08
chr1-1809	chr1	34700771	34700903	5.33	2.75e-05	6.5	5.09e-06
chr1-181	chr1	87786401	87786533	12.43	3.41e-26	21.62	4.19e-34
chr1-1819	chr1	40025900	40026032	19.18	1.9e-09	6.8	1.06e-05
chr1-182	chr1	89137277	89137409	30.9	7.03e-33	16.68	1.96e-25
chr1-1820	chr1	42351944	42352076	21.31	8.93e-11	16.61	9.43e-10
chr1-1826	chr1	44041911	44042043	21.31	8.93e-11	17.8	4.92e-10
chr1-1827	chr1	44585319	44585451	5.33	2.75e-05	19.67	1.91e-10
chr1-1829	chr1	51852395	51852527	21.31	8.93e-11	17.8	4.92e-10
chr1-183	chr1	93210321	93210453	10.65	7.62e-21	22.65	4.78e-30
chr1-1830	chr1	52280358	52280490	21.31	8.93e-11	16.99	7.63e-10
chr1-1831	chr1	54666154	54666286	9.59	6.09e-07	18.69	2.37e-09
chr1-1836	chr1	57751932	57752064	5.33	2.75e-05	18.23	3.92e-10
chr1-1838	chr1	59037860	59037992	9.59	6.09e-07	18.69	2.37e-09
chr1-184	chr1	134061277	134061409	34.1	1.95e-37	7.97	1.6e-18
chr1-1841	chr1	60409660	60409792	9.59	6.09e-07	8.52	1.76e-06
chr1-1842	chr1	60825956	60826088	21.31	8.93e-11	14.11	4.35e-09
chr1-1843	chr1	62216078	62216210	17.05	3.65e-08	13.91	1.67e-07
chr1-1846	chr1	63935062	63935194	17.05	3.65e-08	6.95	2.76e-05
chr1-185	chr1	171247160	171247292	10.65	7.62e-21	17.8	4.68e-27
chr1-1851	chr1	66617281	66617413	21.31	8.93e-11	13.59	6.13e-09
chr1-1854	chr1	71102916	71103048	5.86	4.62e-06	11.11	8.32e-09
chr1-1855	chr1	71184180	71184312	21.31	8.93e-11	19.67	1.91e-10
chr1-1857	chr1	71652619	71652751	5.33	2.75e-05	10.68	5.6e-08
chr1-1858	chr1	72244341	72244473	9.59	6.09e-07	8.11	2.61e-06
chr1-1859	chr1	72537033	72537165	5.86	4.62e-06	11.75	4.76e-09
chr1-186	chr1	177640634	177640766	7.46	3.22e-19	24.68	4.96e-36
chr1-1861	chr1	73153533	73153665	23.44	3.81e-12	19.12	3.21e-11
chr1-1866	chr1	74317471	74317603	9.59	6.09e-07	12.01	9.68e-08
chr1-1867	chr1	74397409	74397541	10.65	5.72e-08	10.53	6.37e-08
chr1-1868	chr1	74538759	74538891	10.65	5.72e-08	8.59	4.38e-07
chr1-187	chr1	185201206	185201338	6.61	8.5e-16	19.98	2.23e-29
chr1-1873	chr1	75425872	75426004	9.59	6.09e-07	10.51	2.89e-07
chr1-1875	chr1	75798832	75798964	10.65	5.72e-08	17.39	6.15e-10
chr1-1877	chr1	78203883	78204015	5.33	2.75e-05	14.11	4.35e-09
chr1-188	chr1	194739812	194739944	15.98	9.83e-26	12.82	4.73e-23
chr1-1880	chr1	80652300	80652432	10.65	5.72e-08	9.46	1.84e-07
chr1-1881	chr1	81097324	81097456	9.59	6.09e-07	10.85	2.23e-07
chr1-1882	chr1	81266571	81266703	21.31	8.93e-11	19.67	1.91e-10
chr1-1883	chr1	81886973	81887105	19.18	1.9e-09	23.2	3.72e-10
chr1-1885	chr1	83076251	83076383	19.18	1.9e-09	22.43	4.98e-10
chr1-189	chr1	31059158	31059290	15.98	9.83e-26	43.13	3.51e-38
chr1-1890	chr1	84560777	84560909	5.33	2.75e-05	16.99	7.63e-10
chr1-1897	chr1	87389117	87389249	5.33	2.75e-05	23.36	3.71e-11
chr1-19	chr1	34583891	34584023	168.35	7.71e-144	51.36	1.46e-103
chr1-190	chr1	36861797	36861929	16.52	5.94e-27	32.19	1.45e-35
chr1-1900	chr1	88318672	88318804	10.65	5.72e-08	24.12	2.74e-11
chr1-1906	chr1	89876474	89876606	21.31	8.93e-11	8.22	6.54e-07
chr1-1908	chr1	90566252	90566384	17.05	3.65e-08	8.67	5.19e-06
chr1-191	chr1	42686854	42686986	15.45	1.57e-24	10.42	5.96e-20
chr1-1911	chr1	92057240	92057372	5.33	2.75e-05	9.46	1.84e-07
chr1-1912	chr1	92635113	92635245	17.05	3.65e-08	9.65	2.42e-06
chr1-1913	chr1	92647816	92647948	5.33	2.75e-05	9.34	2.06e-07
chr1-1918	chr1	93695036	93695168	10.65	5.72e-08	13.35	7.25e-09
chr1-192	chr1	87574930	87575062	15.98	9.83e-26	41.53	1.06e-37
chr1-1920	chr1	98267453	98267585	21.31	8.93e-11	39.35	2.4e-13
chr1-1924	chr1	104838951	104839083	5.86	4.62e-06	6.18	2.8e-06
chr1-1925	chr1	105355672	105355804	10.65	5.72e-08	10.24	8.18e-08
chr1-1927	chr1	106013858	106013990	9.59	6.09e-07	20.39	1.13e-09
chr1-193	chr1	90967755	90967887	11.01	6.9e-22	30.9	5.09e-35
chr1-1932	chr1	106630154	106630286	10.65	5.72e-08	11.5	2.85e-08
chr1-1937	chr1	120207554	120207686	21.31	8.93e-11	12.46	1.37e-08
chr1-194	chr1	120142643	120142775	17.05	3.48e-28	39.87	1.5e-39
chr1-1941	chr1	126925316	126925448	9.59	6.09e-07	7.48	4.99e-06
chr1-1942	chr1	127537485	127537617	21.31	8.93e-11	15.57	1.73e-09
chr1-1944	chr1	128304038	128304170	9.59	6.09e-07	15.29	1.3e-08
chr1-1946	chr1	130699791	130699923	9.59	6.09e-07	14.32	2.26e-08
chr1-1947	chr1	130875301	130875433	5.86	4.62e-06	12.85	1.93e-09
chr1-1949	chr1	131135230	131135362	5.33	2.75e-05	7.95	8.73e-07
chr1-195	chr1	120245977	120246109	33.03	6.66e-36	34.08	2.6e-36
chr1-1950	chr1	131137278	131137410	10.65	5.72e-08	7.63	1.26e-06
chr1-1951	chr1	131418141	131418273	21.31	8.93e-11	10.83	4.91e-08
chr1-1952	chr1	131427373	131427505	10.65	5.72e-08	9.71	1.46e-07
chr1-1954	chr1	131983004	131983136	5.33	2.75e-05	10.1	9.25e-08
chr1-1956	chr1	132208292	132208424	21.31	8.93e-11	10.1	9.25e-08
chr1-1957	chr1	133596776	133596908	9.59	6.09e-07	18.69	2.37e-09
chr1-196	chr1	128405049	128405181	6.39	5.65e-15	31.15	4.66e-34
chr1-1961	chr1	134104080	134104212	19.18	1.9e-09	6.41	1.67e-05
chr1-1963	chr1	134151917	134152049	21.31	8.93e-11	13.12	8.54e-09
chr1-1964	chr1	134196607	134196739	5.33	2.75e-05	12.26	1.59e-08
chr1-1966	chr1	134405841	134405973	5.33	2.75e-05	19.17	2.44e-10
chr1-1969	chr1	135347562	135347694	10.65	5.72e-08	9.12	2.57e-07
chr1-197	chr1	133661331	133661463	16.52	5.94e-27	26.64	4.34e-33
chr1-1972	chr1	135645922	135646054	19.18	1.9e-09	11.8	1.12e-07
chr1-1974	chr1	135917357	135917489	21.31	8.93e-11	14.38	3.64e-09
chr1-198	chr1	134219640	134219772	11.01	6.9e-22	35.11	1.06e-36
chr1-1981	chr1	137691336	137691468	19.18	1.9e-09	11.6	1.29e-07
chr1-1982	chr1	137751788	137751920	5.33	2.75e-05	13.35	7.25e-09
chr1-1983	chr1	138964125	138964257	9.59	6.09e-07	12.01	9.68e-08
chr1-1984	chr1	143145758	143145890	19.18	1.9e-09	10.51	2.89e-07
chr1-1985	chr1	143814059	143814191	5.33	2.75e-05	24.92	2e-11
chr1-1987	chr1	144003635	144003767	21.31	8.93e-11	7.19	2.13e-06
chr1-1988	chr1	144003971	144004103	9.59	6.09e-07	6.29	1.93e-05
chr1-199	chr1	137378654	137378786	33.03	6.66e-36	42.14	4.3e-39
chr1-1990	chr1	150878618	150878750	17.05	3.65e-08	9.97	1.91e-06
chr1-1993	chr1	151686108	151686240	10.65	5.72e-08	9.58	1.64e-07
chr1-1995	chr1	151881428	151881560	19.18	1.9e-09	6.66	1.23e-05
chr1-1996	chr1	151953745	151953877	10.65	5.72e-08	8.9	3.2e-07
chr1-2	chr1	172349977	172350109	33.03	2.78e-138	75.98	3.12e-182
chr1-20	chr1	43317278	43317410	42.09	7.05e-97	64.9	1.87e-111
chr1-200	chr1	183118575	183118707	12.43	3.41e-26	55.67	4.55e-48
chr1-2004	chr1	153588048	153588180	10.65	5.72e-08	13.59	6.13e-09
chr1-2005	chr1	153635680	153635812	9.59	6.09e-07	11.21	1.71e-07
chr1-201	chr1	184066171	184066303	61.8	2.09e-41	28.91	4.71e-32
chr1-2010	chr1	155109516	155109648	21.31	8.93e-11	9.46	1.84e-07
chr1-2013	chr1	155790546	155790678	5.33	2.75e-05	14.38	3.64e-09
chr1-2014	chr1	156183663	156183795	19.18	1.9e-09	12.94	5.24e-08
chr1-2016	chr1	157047740	157047872	5.33	2.75e-05	9.12	2.57e-07
chr1-202	chr1	59237322	59237454	11.01	6.9e-22	37.99	9.83e-38
chr1-2020	chr1	157426217	157426349	10.65	5.72e-08	18.69	3.1e-10
chr1-2023	chr1	158161654	158161786	10.65	5.72e-08	16.61	9.43e-10
chr1-2024	chr1	158310607	158310739	21.31	8.93e-11	16.61	9.43e-10
chr1-2026	chr1	159702182	159702314	19.18	1.9e-09	14.02	2.69e-08
chr1-2027	chr1	160149644	160149776	21.31	8.93e-11	11.87	2.14e-08
chr1-2028	chr1	160743363	160743495	9.59	6.09e-07	14.95	1.57e-08
chr1-203	chr1	64173865	64173997	31.96	2.2e-34	56.07	1.57e-41
chr1-2030	chr1	163252022	163252154	21.31	8.93e-11	11.16	3.76e-08
chr1-2031	chr1	163618216	163618348	9.59	6.09e-07	14.32	2.26e-08
chr1-2033	chr1	165583635	165583767	5.33	2.75e-05	17.8	4.92e-10
chr1-2034	chr1	165658737	165658869	9.59	6.09e-07	10.19	3.71e-07
chr1-2036	chr1	166339117	166339249	10.65	5.72e-08	19.17	2.44e-10
chr1-2037	chr1	166409787	166409919	10.65	5.72e-08	14.38	3.64e-09
chr1-204	chr1	64853799	64853931	7.72	1.39e-16	24.36	5.63e-30
chr1-2040	chr1	168432400	168432532	9.59	6.09e-07	8.97	1.16e-06
chr1-2041	chr1	169460212	169460344	5.33	2.75e-05	7.48	1.51e-06
chr1-2043	chr1	169934313	169934445	5.33	2.75e-05	10.24	8.18e-08
chr1-2046	chr1	170721684	170721816	9.59	6.09e-07	14.32	2.26e-08
chr1-2048	chr1	171263212	171263344	21.31	8.93e-11	8.69	3.95e-07
chr1-205	chr1	66569821	66569953	33.03	6.66e-36	77.25	4.15e-47
chr1-2050	chr1	172132380	172132512	10.65	5.72e-08	15.91	1.42e-09
chr1-2051	chr1	172324784	172324916	21.31	8.93e-11	14.11	4.35e-09
chr1-2052	chr1	172562705	172562837	21.31	8.93e-11	9.97	1.15e-07
chr1-2054	chr1	174964221	174964353	17.05	3.65e-08	22.15	5e-09
chr1-2056	chr1	176880309	176880441	21.31	8.93e-11	15.26	2.09e-09
chr1-2058	chr1	178627159	178627291	21.31	8.93e-11	17.8	4.92e-10
chr1-2059	chr1	179546827	179546959	10.65	5.72e-08	7.71	1.15e-06
chr1-206	chr1	73169476	73169608	16.52	5.94e-27	39.28	3.59e-38
chr1-2060	chr1	179668383	179668515	10.65	5.72e-08	10.1	9.25e-08
chr1-2061	chr1	179802956	179803088	21.31	8.93e-11	8.4	5.37e-07
chr1-2062	chr1	179931451	179931583	5.33	2.75e-05	17.8	4.92e-10
chr1-2065	chr1	180407181	180407313	5.33	2.75e-05	7.95	8.73e-07
chr1-2067	chr1	180604681	180604813	10.65	5.72e-08	22.65	4.98e-11
chr1-2068	chr1	180720437	180720569	5.33	2.75e-05	14.95	2.53e-09
chr1-2069	chr1	180904616	180904748	5.33	2.75e-05	10.24	8.18e-08
chr1-207	chr1	73864509	73864641	66.06	4.96e-45	37.38	1.61e-37
chr1-2072	chr1	181793658	181793790	9.59	6.09e-07	12.46	7.16e-08
chr1-2074	chr1	182115825	182115957	5.33	2.75e-05	7.55	1.38e-06
chr1-2075	chr1	182282631	182282763	19.18	1.9e-09	11.03	1.95e-07
chr1-2077	chr1	183947336	183947468	5.33	2.75e-05	18.69	3.1e-10
chr1-2079	chr1	184906172	184906304	19.18	1.9e-09	13.19	4.46e-08
chr1-208	chr1	85720405	85720537	15.98	9.83e-26	32.98	8.85e-35
chr1-2081	chr1	184999914	185000046	21.31	8.93e-11	13.59	6.13e-09
chr1-2083	chr1	185546556	185546688	5.86	4.62e-06	19.12	3.21e-11
chr1-2084	chr1	185638736	185638868	10.65	5.72e-08	16.99	7.63e-10
chr1-2085	chr1	186712914	186713046	19.18	1.9e-09	14.02	2.69e-08
chr1-2086	chr1	187283008	187283140	23.44	3.81e-12	18.27	5.16e-11
chr1-209	chr1	119256814	119256946	29.83	2.17e-31	9.69	1.62e-18
chr1-2095	chr1	192092651	192092783	10.65	5.72e-08	14.66	3.04e-09
chr1-21	chr1	43358272	43358404	44.75	4.43e-105	75.66	6.59e-124
chr1-210	chr1	119913114	119913246	10.3	8.15e-20	37.38	3.31e-35
chr1-2100	chr1	193699015	193699147	17.05	3.65e-08	11.08	8.93e-07
chr1-2101	chr1	193736339	193736471	21.31	8.93e-11	14.11	4.35e-09
chr1-2102	chr1	194363268	194363400	9.59	6.09e-07	11.6	1.29e-07
chr1-2104	chr1	194619775	194619907	9.59	6.09e-07	6.41	1.67e-05
chr1-2106	chr1	4412601	4412733	8.52	5.84e-06	15.33	8.08e-08
chr1-2108	chr1	9248588	9248720	19.18	1.9e-09	30.58	3.4e-11
[truncated: 24,528 more rows]

## Sheet: Brn_ChIP_NPC
#PeakID	chr	start	end	Fold Change vs Control	p-value vs Control	Fold Change vs Local	p-value vs Local
[truncated: 6,645 more rows]

[truncated: 1 more sheets: H3K4_ChIP_NPC]
